# Supplementary material
Source: publisher figshare collection journal article supplement (https://gsapubs.figshare.com/ndownloader/files/22411428)
Supplement: Supplementary file 1 [file 22411428]

Archive with 6 entries (6 files):
- References Cited.docx
- Supplement 1_Ar-Ar Age Protocol and Results Summary.pdf
- Supplement 2_Lower Steens Mineral Compositions.xlsx
- Supplement 3_Steens Basalt Whole Rock & Location data.xls
- Supplement 4_Steens Bootstrapping Data and Results.xlsx
- Supplement 5_Plots to Demonstrate Lack of Cryptic Alteration.pdf
