# Supplementary material
Source: publisher figshare collection journal article supplement (https://gsapubs.figshare.com/ndownloader/files/22411428)
Supplement: Supplementary file 1 [file 22411428 › References Cited.docx]

**Supplemental References Cited**

Koppers, A.A.P., 2002, ArArCALC-software for 40Ar/39Ar age calculations: Computers & Geosciences, v. 28, p. 605–619, https://doi.org/10.1016/S0098-3004(01)00095-4.

Min, K., Mundil, R., Renne, P.R., and Ludwig, K.R., 2000, A test for systematic errors in 40Ar/39Ar geochronology through comparison with U/Pb analysis of a 1.1-Ga rhyolite: Geochimica et Cosmochimica Acta, v. 64, p. 73–98, https://doi.org/10.1016/S0016-7037(99)00204-5.
