# Supplementary material
Source: publisher figshare collection journal article supplement (https://gsapubs.figshare.com/ndownloader/files/22411428)
Supplement: Supplementary file 1 [file 22411428 › Supplement 1_Ar-Ar Age Protocol and Results Summary.pdf]

**EXP#16D03488 > NMSB55 > Groundmass > MOORE (15-45)**  
**OREGON > STEENS MOUNTAIN**  
**15-OSU-06 (6B20-15) > Incremental Heating > Dan Miggins**

**Information on Analysis  
and Constants Used in Calculations**

Project = **MOORE (15-45)**  
Sample = **NMSB55**  
Material = **Groundmass**  
Location = **Steens Mountain**  
Region = **Oregon**  
Analyst = **Dan Miggins**  
Irradiation = **15-OSU-06 (6B20-15)**  
Position = **X: 0 | Y: 0 | Z/H: 23.38 mm**  
FCT-NM Age = **28.201 ± 0.023 Ma**  
FCT-NM Reference = **Kuiper et al (2008)**  
FCT-NM 40Ar/39Ar Ratio = **8.85262 ± 0.01169**  
FCT-NM J-value = **0.00177545 ± 0.00000234**  
Air Shot 40Ar/36Ar = **304.0500 ± 0.4135**  
Air Shot MDF = **0.99296082 ± 0.00066477 (LIN)**  
Experiment Type = **Incremental Heating**  
Extraction Method = **Bulk Laser Heating**  
Heating = **77 sec**  
Isolation = **3.00 min**  
Instrument = **ARGUS-VI-D**  
Preferred Age = **Undefined**  
Age Classification = **Undefined**  
IGSN = **Undefined**  
Rock Class = **Igneous>Volcanic>Mafic**  
Lithology = **Basaltic Lava**  
Lat-Lon = **Undefined - Undefined**  
Age Equations = **Min et al. (2000)**  
Negative Intensities = **Allowed**  
Collector Calibrations = **36Ar**  
Decay 40K = **5.530 ± 0.048 E-10 1/a**  
Decay 39Ar = **2.940 ± 0.016 E-07 1/h**  
Decay 37Ar = **8.230 ± 0.012 E-04 1/h**  
Decay 36Cl = **2.257 ± 0.015 E-06 1/a**  
Decay 40K(EC,β<sup>+</sup>) = **0.580 ± 0.009 E-10 1/a**  
Decay 40K(β<sup>-</sup>) = **4.950 ± 0.043 E-10 1/a**  
Atmospheric 40/36(a) = **295.50**  
Atmospheric 38/36(a) = **0.1869**  
Production 39/37(ca) = **0.0006756 ± 0.0000089**  
Production 38/37(ca) = **0.0000718 ± 0.0000092**  
Production 36/37(ca) = **0.0002663 ± 0.0000004**  
Production 40/39(k) = **0.003823 ± 0.000102**  
Production 38/39(k) = **0.012031 ± 0.000019**  
Production 36/38(cl) = **262.80 ± 1.71**  
Scaling Ratio K/Ca = **0.430**  
Abundance Ratio 40K/K = **1.1700 ± 0.0100 E-04**  
Atomic Weight K = **39.0983 ± 0.0001 g**

| Results                 | 40(a)/36(a) ± 2σ                | 40(r)/39(k) ± 2σ             | Age ± 2σ (Ma)                                         | MSWD           | 39Ar(k) (%n)                               | K/Ca ± 2σ     |
|-------------------------|---------------------------------|------------------------------|-------------------------------------------------------|----------------|--------------------------------------------|---------------|
| <b>Age Plateau</b>      |                                 |                              |                                                       |                |                                            |               |
| <b>Error Mean</b>       |                                 | 5.31025 ± 0.01053<br>± 0.20% | <b>16.97 ± 0.06</b><br>± 0.33%                        | 3.86<br>0%     | 43.44<br>11                                | 0.119 ± 0.008 |
|                         |                                 |                              | Full External Error ± 0.39<br>Analytical Error ± 0.03 | 1.89<br>1.9658 | 2σ Confidence Limit<br>Error Magnification |               |
| <b>Total Fusion Age</b> |                                 | 5.28096 ± 0.00433<br>± 0.08% | <b>16.88 ± 0.05</b><br>± 0.28%                        |                | 43                                         | 0.092 ± 0.000 |
|                         |                                 |                              | Full External Error ± 0.38<br>Analytical Error ± 0.01 |                |                                            |               |
| <b>Normal Isochron</b>  | <b>292.02 ± 6.09</b><br>± 2.09% | 5.31902 ± 0.01877<br>± 0.35% | <b>17.00 ± 0.07</b><br>± 0.44%                        | 3.92<br>0%     | 43.44<br>11                                |               |
| <b>Error Chron</b>      |                                 |                              | Full External Error ± 0.39<br>Analytical Error ± 0.06 | 1.94<br>1.9799 | 2σ Confidence Limit<br>Error Magnification |               |
| <b>Inverse Isochron</b> | <b>292.39 ± 6.02</b><br>± 2.06% | 5.31822 ± 0.01854<br>± 0.35% | <b>16.99 ± 0.07</b><br>± 0.44%                        | 3.84<br>0%     | 43.44<br>11                                |               |
| <b>Error Chron</b>      |                                 |                              | Full External Error ± 0.39<br>Analytical Error ± 0.06 | 1.94<br>1.9595 | 2σ Confidence Limit<br>Error Magnification |               |
|                         |                                 |                              |                                                       | 28%            | Spreading Factor                           |               |

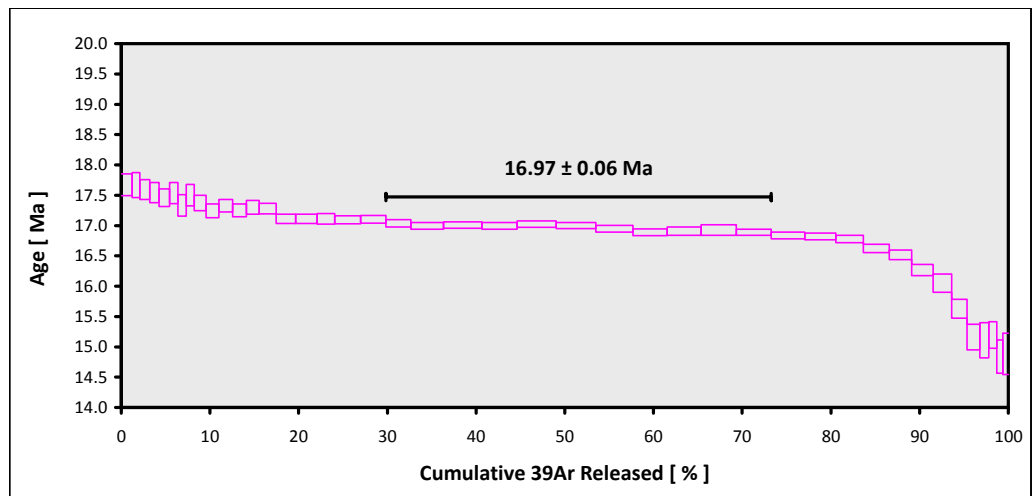

Clear plateau slightly sloping downwards

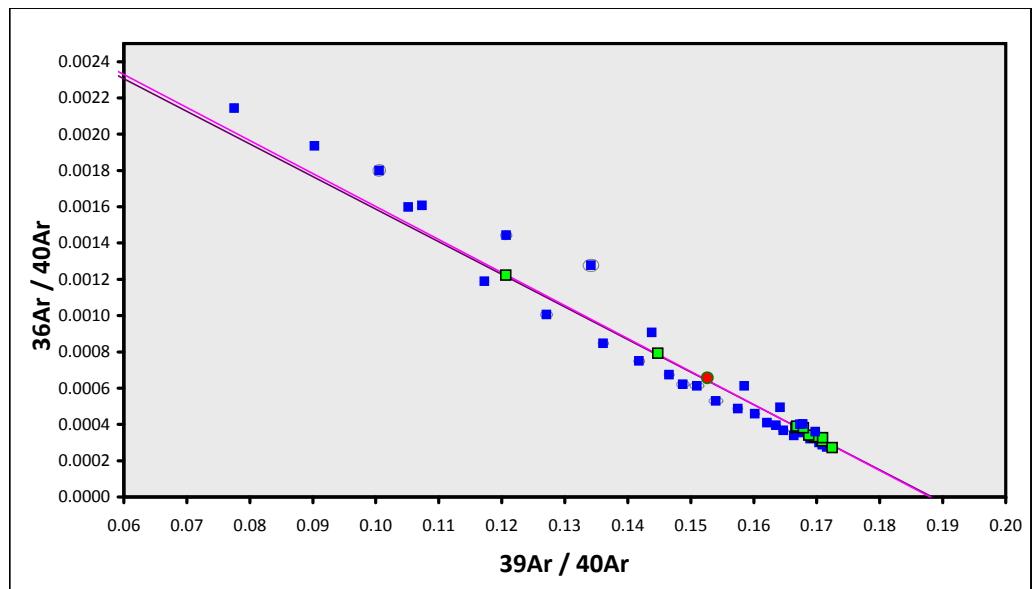

#### *<sup>40</sup>Ar-<sup>39</sup>Ar Dating Preparation, Irradiation and Analytical Protocol*

A groundmass separate of sample NMSB55 for <sup>40</sup>Ar-<sup>39</sup>Ar was prepared as follows. Hand selected chips were crushed in a disk mill or mortar and pestle then sieved to 150-212 µm. A non-magnetic fraction was separated, which was then leached consecutively in 1N HCl (60 min), 6N HCl (60 min), 1N HNO<sub>3</sub> (60 min), 3N HNO<sub>3</sub> (60 min) and 18M Ω water (60 min). Each leaching step was conducted in an ultrasonic bath heated to 50-60°C, and following each acid step the samples were washed three times with 18M Ω water to remove any acid remaining on the samples. About 20 mg of the least altered grains were handpicked for analysis. Select groundmass grains were placed in a 9 mm quartz vial with Fish Canyon Tuff sanidine (FCT-NM) flux monitors. The sample was irradiated for 6 hours in the Cadmium-Lined In-Core Irradiation Tube (CLICIT) TRIGA nuclear reactor at Oregon State University. After irradiation, the sample was loaded in a copper tray, placed under vacuum, baked and pumped overnight at 150°C, and pre-cleaned using two low (<300°C) temperature heating steps.

Incremental age determinations were performed on a Thermo Scientific Model ARGUS-VI mass spectrometer in the Argon Geochronology Lab at Oregon State University. The ARGUS-VI has four Faraday collectors, each fitted with 10<sup>12</sup> Ohm resistors, and one ion-counting CuBE electron multiplier. The arrangement allows for the simultaneous measurement of <sup>36</sup>Ar on the multiplier and <sup>37</sup>Ar through <sup>40</sup>Ar on the adjacent Faraday collectors. J-values were calculated using a parabolic fit with interpolation between measured age standards. Age calculation and correction was performed using the decay constants of Min et al., 2000, the FCT-NM sanidine standard age of 28.201 ± 0.023 Ma (1σ; Kuiper et al. 2008), and ArArCALC v2.6.2 software (Koppers, 2002). All analytical results including total fusion age, normal and inverse isochrons, MSWD, operating conditions, constant values and other metadata are reported in Supplement 2.
