# Supplementary material
Source: publisher figshare collection journal article supplement (https://gsapubs.figshare.com/ndownloader/files/22411428)
Supplement: Supplementary file 1 [file 22411428 › Supplement 2_Lower Steens Mineral Compositions.xlsx]

## Sheet: Olivine
Sample_Grain	Grain # / Point	Grain Type	SiO2 wt.%	TiO2 wt.%	Al2O3 wt.%	FeO wt.%	MnO wt.%	MgO wt.%	CaO wt.%	Na2O wt.%	K2O wt.%	NiO wt.%	Cr2O3 wt.%	Total	Fo	Ni ppm
MF9466_Ol 1	1 / 1 .	Phenocryst	39.6907	0.0244	0.0464	17.2488	0.266	42.4218	0.228	0	0.0011	0.271	0.0509	100.249	81.4265	2129.52
MF9466_Ol 1	1 / 2 .	Phenocryst	39.567	0.0065	0.04	17.4005	0.2802	42.8788	0.2316	0	0	0.2326	0.0444	100.681	81.4561	1827.77
MF9466_Ol 1	1 / 3 .	Phenocryst	38.963	0.0134	0.0389	17.4455	0.2861	42.7433	0.2632	0.0106	0	0.2386	0.0482	100.051	81.3691	1874.92
MF9466_Ol 2	2 / 1 .	Phenocryst	39.2987	0.0097	0.0358	17.5919	0.2598	42.358	0.2618	0.0054	0	0.3013	0.0423	100.165	81.1037	2367.62
MF9466_Ol 2	2 / 2 .	Phenocryst	39.573	0.0165	0.0412	17.3022	0.2207	42.872	0.2491	0	0.0079	0.2528	0.0416	100.577	81.5392	1986.5
MF9466_Ol 2	2 / 3 .	Phenocryst	39.1173	0.0091	0.0404	18.0372	0.2124	42.5998	0.2648	0.0016	0.0005	0.286	0.0294	100.599	80.8061	2247.39
MF9466_Ol 3	3 / 1 .	Phenocryst	39.073	0.0215	0.0481	16.7309	0.2834	42.9596	0.2409	0	0	0.3055	0.0526	99.7156	82.0693	2400.62
MF9466_Ol 3	3 / 2 .	Phenocryst	39.2984	0.0085	0.0634	17.2498	0.258	43.0191	0.2326	0.0065	0	0.2508	0.0547	100.442	81.6362	1970.79
MF9466_Ol 3	3 / 3 .	Phenocryst	38.6662	0.0042	0.036	17.6514	0.2546	42.0493	0.2593	0	0.0022	0.3234	0.0372	99.2838	80.9393	2541.28
MF9466_Ol 4	4 / 1 .	Micropheno	39.5048	0.0226	0.0228	17.6218	0.3153	43.5757	0.2483	0.0058	0.0047	0.2386	0.0397	101.6	81.5087	1874.92
MF9466_Ol 4	4 / 2 .	Micropheno	38.5829	0.0103	0.1452	18.3415	0.2946	42.396	0.2615	0.0021	0	0.2606	0.0458	100.341	80.47	2047.79
MF9466_Ol 5	5 / 1 .	Phenocryst	39.2777	0.0134	0.041	16.3794	0.2291	43.223	0.23	0.0076	0	0.2672	0.0444	99.7129	82.4682	2099.66
MF9466_Ol 5	5 / 2 .	Phenocryst	38.6861	0.0241	0.174	17.3516	0.2065	41.9136	0.2737	0	0.0001	0.2436	0.033	98.9062	81.1528	1914.21
MF9466_Ol 5	5 / 3 .	Phenocryst	37.9865	0.0104	2.1503	16.7182	0.2247	39.5774	0.2781	0.0238	0.0055	0.2528	0.0436	97.2713	80.8425	1986.5
MF9466_Ol 6	6 / 1 .	Phenocryst	39.0534	0.0038	0.0404	17.2593	0.258	42.5808	0.2325	0.0056	0	0.2791	0.0487	99.7617	81.4738	2193.17
MF9466_Ol 6	6 / 2 .	Phenocryst	38.968	0.0078	0.0485	17.0399	0.251	42.4324	0.2398	0.0009	0.0086	0.2508	0.0345	99.2822	81.6138	1970.79
MF9466_Ol 6	6 / 3 .	Phenocryst	39.3998	0.0114	0.0314	17.8033	0.2578	42.8209	0.269	0	0.0201	0.285	0.0466	100.945	81.0872	2239.53
MF9466_Ol 7	7 / 1 .	Phenocryst	39.3529	0.0155	0.0436	17.432	0.2377	42.6571	0.2327	0.0151	0	0.3104	0.0797	100.377	81.3503	2439.12
MF9466_Ol 7	7 / 2 .	Phenocryst	38.8799	0.0161	0.0519	17.0215	0.2762	42.6202	0.2407	0.0116	0	0.2974	0.0611	99.4766	81.6962	2336.97
MF9466_Ol 7	7 / 3 .	Phenocryst	39.419	0.0103	0.0637	17.4187	0.2932	42.5971	0.2393	0	0.0051	0.2841	0.0387	100.369	81.3405	2232.46
MF9466_Ol 8	8 / 1 .	Phenocryst	39.2167	0.0158	0.046	17.3791	0.288	42.576	0.2472	0	0	0.2911	0.0501	100.11	81.3675	2287.46
MF9466_Ol 8	8 / 2 .	Phenocryst	39.4852	0.0123	0.06	17.2401	0.2822	42.3847	0.2462	0.0042	0.0044	0.2366	0.0392	99.9951	81.4209	1859.2
MF9466_Ol 8	8 / 3 .	Phenocryst	39.1695	0.0103	0.0362	17.4978	0.2619	42.6629	0.2642	0.0001	0.0148	0.2871	0.045	100.25	81.2951	2256.03
MF9466_Ol 9	9 / 1 .	Phenocryst	39.417	0.0075	0.0427	16.7111	0.2673	43.2026	0.2258	0.0106	0	0.3602	0.0553	100.3	82.1695	2830.45
MF9466_Ol 9	9 / 2 .	Phenocryst	40.3627	0.0158	0.0416	16.5787	0.2392	43.6007	0.2323	0.023	0	0.2905	0.0551	101.44	82.4191	2282.75
MF9466_Ol 9	9 / 3 .	Phenocryst	39.9802	0.0022	0.0448	16.943	0.2552	42.9132	0.2381	0.0238	0	0.2519	0.0414	100.694	81.8671	1979.43
MF9466_Ol 10	10 / 1 .	Microphenocryst	39.3335	0.0163	0.036	16.8253	0.2814	42.421	0.2462	0.0034	0	0.2681	0.0468	99.4778	81.7993	2106.73
MF9466_Ol 10	10 / 2 .	Microphenocryst	38.7724	0.0236	0.0444	17.309	0.2246	41.7787	0.2528	0	0	0.279	0.0464	98.731	81.1411	2192.38
MF9466_Ol 11	11 / 1 .	Phenocryst	39.3763	0.007	0.0416	16.844	0.2511	42.751	0.2536	0.005	0.0074	0.2701	0.0246	99.8316	81.8979	2122.45
MF9466_Ol 11	11 / 2 .	Phenocryst	38.8263	0.0105	0.0524	17.4278	0.2649	42.8078	0.243	0.0222	0.0014	0.2446	0.0488	99.9497	81.4074	1922.07
MF9466_Ol 11	11 / 3 .	Phenocryst	39.3387	0.01	0.0289	17.9313	0.2426	42.2955	0.2687	0.0106	0	0.2547	0.0581	100.439	80.7862	2001.43
MF9466_Ol 12	12 / 1 .	Phenocryst	39.9493	0.0199	0.0401	17.2636	0.2127	42.7592	0.2561	0	0	0.2266	0.0493	100.777	81.5331	1780.62
MF9466_Ol 12	12 / 2 .	Phenocryst	39.7801	0.0042	0.0677	17.5912	0.2025	42.8486	0.2434	0.0111	0	0.2619	0.0361	101.047	81.2802	2058.01
MF9466_Ol 12	12 / 3 .	Phenocryst	39.4427	0.0037	0.0404	17.568	0.2418	42.552	0.2619	0	0.0075	0.2548	0.045	100.418	81.1944	2002.22
MF9466_Ol 13	13 / 1 .	Microphenocryst	39.2322	0.015	0.054	17.5155	0.264	43.038	0.255	0.0045	0.0118	0.3094	0.0502	100.749	81.4126	2431.27
MF9466_Ol 13	13 / 2 .	Microphenocryst	38.959	0.031	0.6101	25.0814	0.2816	31.372	0.618	0.0352	0.0773	0.2355	0.091	97.3921	69.0367	1850.56
MF9466_Ol 14	14 / 1 .	Microphenocryst	39.6143	0.0105	0.0394	17.416	0.2378	42.8283	0.2618	0.0142	0	0.2538	0.0411	100.717	81.4249	1994.36
MF9466_Ol 14	14 / 2 .	Microphenocryst	39.1209	0.0076	0.0281	18.6557	0.2643	41.9185	0.2672	0	0	0.2363	0.0462	100.545	80.0212	1856.85
MF9466_Ol 15	15 / 1 .	Phenocryst	39.7377	0.0092	0.043	17.2945	0.2669	40.9958	0.2504	0	0	0.2335	0.0335	98.8645	80.8629	1834.84
MF9466_Ol 15	15 / 2 .	Phenocryst	39.1345	0.0161	0.0481	17.6107	0.2497	42.4022	0.2349	0	0	0.279	0.026	100.001	81.1034	2192.38
MF9466_Ol 15	15 / 3 .	Phenocryst	39.1972	0.0004	0.0374	17.1552	0.2409	42.3453	0.2453	0	0.0042	0.2083	0.0412	99.4754	81.4815	1636.82
MF9466_Ol 15	15 / 4 .	Phenocryst	39.8163	0.021	0.0142	18.5434	0.2986	42.1279	0.2562	0	0.0033	0.2868	0.0297	101.398	80.1968	2253.67
MF9466_Ol 16	16 / 1 .	Microphenocryst	39.1633	0.0129	0.041	16.9186	0.2158	42.6465	0.2604	0	0	0.2347	0.0529	99.546	81.7959	1844.27
MF9466_Ol 16	16 / 2 .	Microphenocryst	38.3818	0.0117	0.0956	18.7255	0.2592	41.3992	0.2572	0.0009	0	0.2746	0.0318	99.4375	79.761	2157.81
MF9466_Ol 17	17 / 1 .	Phenocryst	39.0892	0.0112	0.0239	17.277	0.2428	42.7717	0.2425	0.0255	0.002	0.274	0.043	100.003	81.5258	2153.09
MF9466_Ol 17	17 / 2 .	Phenocryst	39.0026	0.0143	0.0639	17.2277	0.2743	45.298	0.2541	0.008	0.0209	0.2792	0.0509	102.494	82.416	2193.95
MF9466_Ol 17	17 / 3 .	Phenocryst	40.2624	0.0158	0.0505	18.1106	0.2194	42.2557	0.255	0.011	0.0059	0.2668	0.0627	101.516	80.6166	2096.51
MF9466_Ol 18	18 / 1 .	Phenocryst	39.4191	0.0226	0.0417	17.0462	0.2098	43.3059	0.2606	0.0065	0	0.2489	0.0337	100.595	81.9122	1955.86
MF9466_Ol 18	18 / 2 .	Phenocryst	39.4944	0.0107	0.0396	17.7615	0.2639	42.8634	0.2497	0.0049	0.0004	0.2153	0.0332	100.937	81.1385	1691.83
MF9466_Ol 18	18 / 3 .	Phenocryst	38.3825	0.021	0.0553	17.2245	0.2276	42.0544	0.2757	0.0008	0	0.2921	0.0469	98.5808	81.316	2295.32
MF9466_Ol 19	19 / 1 .	Microphenocryst	38.974	0.0135	3.8924	15.9953	0.175	47.109	0.3421	0.0155	0.0073	0.2259	0.0383	106.788	83.9998	1775.12
MF9466_Ol 19	19 / 2 .	Microphenocryst	38.9876	0.0205	0.0459	18.5733	0.2907	42.9123	0.273	0.0076	0	0.2364	0.0277	101.375	80.4629	1857.63
MF9466_Ol 20	20 / 1 .	Phenocryst	39.0227	0.027	0.598	24.666	0.3016	30.905	0.6398	0.0386	0.0443	0.2145	0.0778	96.5354	69.0731	1685.54
MF9466_Ol 20	20 / 2 .	Phenocryst	39.8905	0.0065	0.0855	17.4046	0.258	42.6208	0.3596	0	0	0.2568	0.0299	100.912	81.3612	2017.93
MF9466_Ol 20	20 / 3 .	Phenocryst	38.6774	0.0088	0.0349	18.1561	0.2515	42.6597	0.2635	0.0117	0	0.2364	0.0792	100.379	80.7259	1857.63
MF9466_Ol21	1 / 1 .	Phenocryst	38.51	0	0.043	16.973	0.252	42.118	0.242	0	0.005	0.25	0.045	98.438	81.5612	1964.5
MF9466_Ol21	1 / 2 .	Phenocryst	39.085	0.007	0.04	17.066	0.253	42.64	0.239	0.004	0	0.221	0.056	99.611	81.6641	1736.62
MF9466_Ol21	1 / 3 .	Phenocryst	38.813	0.004	0.038	17.282	0.234	42.682	0.24	0.016	0	0.196	0.03	99.535	81.4898	1540.17
MF9466_Ol22	2 / 1 .	Phenocryst	38.751	0.013	0.051	16.941	0.225	42.534	0.236	0	0	0.257	0.041	99.049	81.7368	2019.51
MF9466_Ol22	2 / 2 .	Phenocryst	38.934	0	0.049	16.983	0.219	42.376	0.253	0.008	0	0.259	0.046	99.126	81.6441	2035.22
MF9466_Ol22	2 / 3 .	Phenocryst	39.243	0.025	0.036	17.237	0.24	42.912	0.246	0.012	0	0.24	0.045	100.235	81.6099	1885.92
MF9466_Ol23	3 / 1 .	Phenocryst	37.969	0.022	0.259	16.656	0.224	42.111	0.249	0.02	0.004	0.235	0.032	97.782	81.8406	1846.63
MF9466_Ol23	3 / 2 .	Phenocryst	39.539	0.007	0.045	17	0.231	42.601	0.236	0.021	0.01	0.262	0.028	99.981	81.7083	2058.8
MF9466_Ol23	3 / 3 .	Phenocryst	38.372	0.009	0.044	17.297	0.245	42.426	0.25	0	0	0.245	0.059	98.946	81.3858	1925.21
MF9466_Ol24	4 / 1 .	Phenocryst	38.3	0.023	0.039	16.815	0.227	42.336	0.234	0	0.005	0.254	0.034	98.266	81.7785	1995.93
MF9466_Ol24	4 / 2 .	Phenocryst	38.473	0.002	0.044	16.794	0.214	42.334	0.251	0.003	0	0.277	0.039	98.429	81.7964	2176.67
MF9466_Ol24	4 / 3 .	Phenocryst	38.45	0.01	0.039	16.791	0.249	42.067	0.246	0.017	0	0.269	0.037	98.177	81.7047	2113.8
MF9466_Ol25	5 / 1 .	Phenocryst	39.105	0.014	0.067	17.095	0.23	41.941	0.235	0.017	0	0.213	0.039	98.958	81.3896	1673.75
MF9466_Ol25	5 / 2 .	Phenocryst	38.862	0.022	0.046	16.952	0.256	42.29	0.241	0.007	0.001	0.213	0.052	98.943	81.641	1673.75
MF9466_Ol25	5 / 3 .	Phenocryst	38.478	0.024	0.052	16.811	0.219	41.468	0.245	0.001	0	0.22	0.05	97.568	81.4714	1728.76
MF9466_Ol26	6 / 1 .	Phenocryst	38.584	0.012	0.05	16.694	0.267	41.834	0.242	0	0.004	0.248	0.052	97.987	81.7083	1948.78
MF9466_Ol26	6 / 2 .	Phenocryst	38.442	0.006	0.067	16.856	0.259	42.142	0.238	0.006	0.004	0.264	0.061	98.345	81.6735	2074.51
MF9466_Ol26	6 / 3 .	Phenocryst	38.659	0.006	0.048	16.764	0.233	42.264	0.244	0.008	0.003	0.215	0.047	98.49	81.7984	1689.47
MF9466_Ol27	7 / 1 .	Phenocryst	38.525	0.013	0.075	16.723	0.255	41.808	0.237	0.008	0	0.283	0.045	97.973	81.673	2223.81
MF9466_Ol27	7 / 2 .	Phenocryst	38.357	0.001	0.077	16.916	0.26	42.139	0.239	0.001	0	0.268	0.06	98.318	81.6192	2105.94
MF9466_Ol27	7 / 3 .	Phenocryst	38.791	0.011	0.047	16.727	0.267	41.885	0.241	0.006	0	0.269	0.035	98.279	81.697	2113.8
MF9466_Ol28	8 / 1 .	Phenocryst	38.458	0.012	0.037	16.575	0.259	41.779	0.24	0	0.005	0.216	0.035	97.615	81.7954	1697.33
MF9466_Ol28	8 / 2 .	Phenocryst	39.11	0.007	0.032	16.684	0.253	42.282	0.241	0.017	0.008	0.224	0.04	98.899	81.8758	1760.19
MF9466_Ol28	8 / 3 .	Phenocryst	38.895	0.029	0.041	17.094	0.247	42.619	0.246	0	0	0.303	0.043	99.517	81.6321	2380.97
MF9466_Ol29	9 / 1 .	Phenocryst	38.2	0.01	0.06	17.328	0.255	42.165	0.255	0.013	0	0.283	0.046	98.615	81.2649	2223.81
MF9466_Ol29	9 / 2 .	Phenocryst	38.17	0.008	0.037	17.278	0.266	42.169	0.25	0	0	0.216	0.041	98.436	81.3103	1697.33
MF9466_Ol29	9 / 3 .	Phenocryst	38.338	0.016	0.088	17.228	0.29	42.501	0.282	0.003	0.003	0.276	0.028	99.054	81.4729	2168.81
MF9466_Ol30	10 / 1 .	Phenocryst	39.177	0.013	0.057	16.742	0.203	41.885	0.249	0.013	0.002	0.283	0.045	98.669	81.6836	2223.81
MF9466_Ol30	10 / 2 .	Phenocryst	39.093	0.007	0.053	16.953	0.268	42.57	0.238	0.01	0.004	0.241	0.04	99.478	81.7388	1893.78
MF9466_Ol30	10 / 3 .	Phenocryst	38.43	0.008	0.232	17.085	0.251	42.128	0.255	0.016	0.009	0.228	0.037	98.679	81.4657	1791.62
MF9466_Ol31	11 / 1 .	Phenocryst	38.388	0.011	0.081	16.598	0.271	42.088	0.222	0.008	0	0.231	0.04	97.938	81.8843	1815.2
MF9466_Ol31	11 / 2 .	Phenocryst	38.839	0.018	0.067	16.652	0.25	42.55	0.22	0.004	0	0.301	0.046	98.947	81.9978	2365.26
MF9466_Ol31	11 / 3 .	Phenocryst	38.191	0.011	0.051	17.24	0.212	42.48	0.251	0.009	0.004	0.248	0.034	98.731	81.455	1948.78
MF9466_Ol32	12 / 1 .	Phenocryst	38.822	0.02	0.063	16.943	0.254	42.6	0.264	0.004	0.011	0.229	0.041	99.251	81.7581	1799.48
MF9466_Ol32	12 / 2 .	Phenocryst	39.425	0.014	0.045	17.365	0.225	42.716	0.242	0.013	0	0.284	0.042	100.371	81.4295	2231.67
MF9466_Ol32	12 / 3 .	Phenocryst	39.508	0.013	0.023	17.23	0.246	42.733	0.246	0	0	0.25	0.044	100.294	81.5532	1964.5
MF9466_Ol33	13 / 1 .	Phenocryst	38.577	0.012	0.055	15.932	0.255	43.413	0.225	0.013	0	0.313	0.039	98.834	82.9272	2459.55
MF9466_Ol33	13 / 2 .	Phenocryst	39.821	0.01	0.053	16.128	0.205	43.152	0.236	0.008	0.004	0.283	0.063	99.962	82.6671	2223.81
MF9466_Ol33	13 / 3 .	Phenocryst	38.013	0.019	0.022	17.462	0.287	41.953	0.259	0.009	0	0.263	0.039	98.327	81.0701	2066.65
MF9466_Ol34	14 / 1 .	Phenocryst	38.761	0.018	0.047	17.555	0.289	42.752	0.251	0.003	0	0.271	0.028	99.974	81.2772	2129.52
MF9466_Ol34	14 / 2 .	Phenocryst	38.598	0.017	0.032	17.382	0.234	42.926	0.258	0.002	0	0.236	0.039	99.724	81.4888	1854.49
MF9466_Ol34	14 / 3 .	Phenocryst	39.203	0.046	0.285	17.281	0.278	42.021	0.38	0.052	0.005	0.2	0.042	99.794	81.2541	1571.6
MF9466_Ol35	15 / 1 .	Phenocryst	38.715	0.025	0.034	17.158	0.236	42.73	0.246	0.024	0.014	0.221	0.037	99.441	81.6151	1736.62
MF9466_Ol35	15 / 2 .	Phenocryst	38.489	0.008	0.058	17.529	0.264	42.44	0.249	0.011	0.008	0.273	0.033	99.361	81.1881	2145.23
MF9466_Ol35	15 / 3 .	Phenocryst	38.964	0	0.032	17.241	0.241	42.065	0.25	0.014	0	0.261	0.028	99.096	81.3053	2050.94
MF9466_Ol36	16 / 1 .	Phenocryst	38.537	0	0.043	17.394	0.268	42.191	0.247	0.003	0	0.282	0.029	98.993	81.2163	2215.96
MF9466_Ol36	16 / 2 .	Phenocryst	38.166	0.013	0.046	17.524	0.243	42.507	0.242	0.008	0	0.301	0.041	99.09	81.2166	2365.26
MF9466_Ol36	16 / 3 .	Phenocryst	38.774	0.012	0.043	17.526	0.246	42.5	0.253	0	0.01	0.242	0.034	99.641	81.2123	1901.64
MF9466_Ol37	17 / 1 .	Phenocryst	39.151	0.017	0.043	16.493	0.223	43.24	0.235	0.006	0	0.3	0.056	99.764	82.3737	2357.4
MF9466_Ol37	17 / 2 .	Phenocryst	38.846	0.024	0.039	16.447	0.245	43.225	0.234	0	0.006	0.323	0.036	99.426	82.4092	2538.13
MF9466_Ol37	17 / 3 .	Phenocryst	38.37	0.006	0.043	17.031	0.238	43.07	0.244	0.005	0	0.31	0.039	99.357	81.8444	2435.98
MF9466_Ol38	18 / 1 .	Phenocryst	38.076	0.022	0.044	18.031	0.328	41.002	0.281	0.009	0	0.23	0.027	98.05	80.2116	1807.34
MF9466_Ol38	18 / 2 .	Phenocryst	38.429	0.031	0.114	18.474	0.288	40.555	0.287	0.005	0	0.205	0.03	98.417	79.6464	1610.89
MF9466_Ol38	18 / 3 .	Phenocryst	37.551	0.018	0.031	17.401	0.232	41.32	0.249	0.006	0.002	0.226	0.044	97.079	80.8898	1775.91
MF9466_Ol39	19 / 1 .	Phenocryst	37.831	0.013	0.048	16.762	0.267	42.391	0.244	0.003	0.008	0.239	0.045	97.849	81.8448	1878.06
MF9466_Ol39	19 / 2 .	Phenocryst	38.391	0.001	0.036	16.693	0.273	41.676	0.266	0.006	0	0.174	0.045	97.56	81.6525	1367.29
MF9466_Ol39	19 / 3 .	Phenocryst	38.296	0.017	0.046	17.596	0.273	41.105	0.246	0	0.007	0.277	0.067	97.931	80.6356	2176.67
MF9467_Ol 1	21 / 1 .	Micro/Incl (in plag)	38.7701	0.0295	0.0598	28.8297	0.4296	35.1655	0.2937	0.0033	0	0.088	0.0078	103.677	68.497	691.504
MF9467_Ol 1	21 / 2 .	Micro/Incl (in plag)	36.1307	0.039	0.0187	33.022	0.4967	30.4946	0.2487	0.0266	0	0.1522	0.0027	100.632	62.2088	1195.99
MF9467_Ol 2	22 / 1 .	Micro/Incl (in plag)	38.2172	0.0163	0.0225	20.2083	0.2735	40.608	0.2673	0.02	0	0.258	0.0392	99.9303	78.1754	2027.36
MF9467_Ol 2	22 / 2 .	Micro/Incl (in plag)	38.6323	0.0227	0.0389	20.2037	0.2936	40.173	0.2727	0.0007	0.0164	0.1704	0.0499	99.8743	77.995	1339
MF9467_Ol 2	22 / 3 .	Micro/Incl (in plag)	38.7191	0.0253	0.015	20.5269	0.3155	40.3095	0.2734	0.0039	0.0094	0.1844	0.0366	100.419	77.7801	1449.02
MF9467_Ol 3	23 / 1 .	Microphenocryst	37.6254	0.0255	0.0689	23.4787	0.2876	36.4608	0.4157	0	0.0142	0.2501	0.0351	98.662	73.462	1965.29
MF9467_Ol 3	23 / 2 .	Microphenocryst	39.1968	0.029	0.34	20.6822	0.2974	39.52	0.3294	0.004	0.0215	0.2136	0.0407	100.675	77.3044	1678.47
MF9467_Ol 3	23 / 3 .	Microphenocryst	39.6836	0.02	0.1552	20.6806	0.2424	38.6565	0.3282	0.0209	0.0283	0.1612	0.0301	100.007	76.9158	1266.71
MF9467_Ol 4	24 / 1 .	Microphenocryst	38.8607	0.0276	0.0341	20.6327	0.3305	40.6676	0.2811	0.0153	0	0.2197	0.0417	101.111	77.844	1726.4
MF9467_Ol 4	24 / 2 .	Microphenocryst	38.1063	0.0164	0.8004	21.8356	0.2722	33.8811	0.421	0.0169	0.0378	0.1799	0.028	95.5956	73.4458	1413.65
MF9467_Ol 4	24 / 3 .	Microphenocryst	36.302	0.0601	0.026	35.9754	0.5262	28.3528	0.2251	0.002	0.0022	0.1269	0.0087	101.608	58.4175	997.18
MF9467_Ol 5	25 / 1 .	Microphenocryst	38.828	0.0269	1.0959	28.1061	0.2196	25.9529	0.8574	0.0021	0.0498	0.1098	0.0548	95.3034	62.207	862.808
MF9467_Ol 5	25 / 2 .	Microphenocryst	39.0436	0.0322	0.8099	26.9692	0.2803	27.207	0.7976	0.0031	0.0232	0.2049	0.0317	95.4025	64.2636	1610.1
MF9467_Ol 5	25 / 3 .	Microphenocryst	38.1695	0.0427	0.8794	27.3763	0.3055	26.3539	0.82	0	0.0426	0.1378	0.024	94.1516	63.1809	1082.83
MF9467_Ol 6	26 / 1 .	Microphenocryst	37.5868	0.046	1.0215	25.4582	0.2601	28.5582	0.6465	0.0023	0.0365	0.1361	0.0151	93.7674	66.6623	1069.47
MF9467_Ol 6	26 / 2 .	Microphenocryst	32.5707	0.033	0.3722	33.008	0.4628	28.3944	0.3442	0.0007	0.0108	0.1201	0.0107	95.3276	60.5274	943.746
MF9467_Ol 7	27 / 1 .	Microphenocryst	40.6799	0.1234	0.6831	19.0177	0.2211	37.9837	2.0074	0.1818	0.0351	0.1614	0.0351	101.13	78.0714	1268.28
MF9467_Ol 7	27 / 2 .	Microphenocryst	35.2616	0.0276	1.7257	33.7003	0.5074	28.0075	0.3125	0.0159	0	0.15	0.0198	99.7282	59.7008	1178.7
MF9467_Ol 8	28 / 1 .	Microphenocryst	37.4298	0.0444	0.9785	33.3569	0.3195	21.6552	0.9897	0.011	0.0657	0.1091	0.0232	94.9831	53.6442	857.308
MF9467_Ol 8	28 / 2 .	Microphenocryst	37.1078	0.0116	1.0967	30.0893	0.3647	25.5662	0.8716	0.0224	0.0216	0.1533	0.0267	95.332	60.2322	1204.63
MF9467_Ol 8	28 / 3 .	Microphenocryst	36.0835	0.0257	0.0125	37.5231	0.5599	27.3839	0.2851	0.0033	0	0.0525	0.0067	101.936	56.5385	412.545
MF9468_Ol1	23 / 1 .	Phenocryst	38.2469	0.0179	0.0312	20.2445	0.2545	40.4613	0.2682	0.0096	0.0189	0.1466	0.0336	99.7331	78.083	1151.98
MF9468_Ol1	23 / 2 .	Phenocryst	38.6356	0.0116	0.0688	20.3189	0.2882	40.8749	0.2605	0.0084	0.0285	0.2055	0.046	100.747	78.1941	1614.82
MF9468_Ol1	23 / 3 .	Phenocryst	38.7366	0.0294	0.0357	21.1612	0.3036	39.8409	0.2753	0	0	0.2322	0.0429	100.658	77.0435	1824.63
MF9468_Ol2	24 / 1 .	Phenocryst	38.4698	0.021	0.0359	20.0228	0.2973	40.6352	0.2655	0	0.0057	0.2033	0.034	99.9905	78.3437	1597.53
MF9468_Ol2	24 / 2 .	Phenocryst	39.1298	0.0099	0.0472	20.1699	0.2992	40.6331	0.2585	0.0007	0.0123	0.2332	0.0261	100.82	78.2184	1832.49
MF9468_Ol2	24 / 3 .	Phenocryst	38.5493	0.0225	0.0543	21.5712	0.236	39.9168	0.2673	0.0137	0	0.2429	0.0218	100.896	76.7364	1908.71
MF9468_Ol3	25 / 1 .	Phenocryst	38.9767	0.0174	0.0546	20.1161	0.2763	40.4169	0.2616	0.0249	0	0.2695	0.044	100.458	78.173	2117.73
MF9468_Ol3	25 / 2 .	Phenocryst	38.7457	0.005	0.0246	20.2831	0.2968	40.4426	0.2945	0.0229	0.0006	0.2043	0.0311	100.351	78.0425	1605.39
MF9468_Ol3	25 / 3 .	Phenocryst	49.8698	0.0608	31.2504	0.9302	0.034	0.1541	13.2233	2.878	0.1377	0	0	98.5383	22.798	0
MF9468_Ol4	26 / 1 .	Phenocryst	38.5482	0.0166	0.0347	20.2631	0.2511	40.8818	0.2726	0.0028	0.0038	0.2756	0.052	100.602	78.2438	2165.66
MF9468_Ol4	26 / 2 .	Phenocryst	38.9978	0.0164	0.0221	20.9514	0.2815	39.7707	0.2753	0.0096	0	0.2426	0.0264	100.594	77.1882	1906.35
MF9468_Ol4	26 / 3 .	Phenocryst	36.7153	0.0544	1.1201	28.0558	0.3472	32.3348	0.2948	0.0093	0.0077	0.1884	0.0251	99.1528	67.2606	1480.45
MF9468_Ol5	27 / 1 .	Microphenocryst	38.2609	0.0192	0.0872	20.371	0.2999	40.0949	0.2798	0	0.0028	0.2658	0.0434	99.725	77.8196	2088.66
MF9468_Ol5	27 / 2 .	Microphenocryst	38.2213	0.0217	0.0317	19.8912	0.3387	40.7711	0.2817	0	0.0079	0.252	0.0248	99.8421	78.5118	1980.22
MF9468_Ol5	27 / 3 .	Microphenocryst	38.6463	0.0156	0.0296	20.3187	0.2646	41.0026	0.2781	0.0174	0.0169	0.235	0.0404	100.865	78.2474	1846.63
MF9468_Ol6	28 / 1 .	Phenocryst	38.157	0.0217	0.0412	20.5872	0.3137	40.5193	0.2722	0	0	0.2296	0.0332	100.175	77.8191	1804.2
MF9468_Ol6	28 / 2 .	Phenocryst	38.5721	0.0173	0.2871	20.3549	0.2678	39.7015	0.2642	0.0043	0.017	0.2536	0.0268	99.7666	77.6626	1992.79
MF9468_Ol6	28 / 3 .	Phenocryst	38.3316	0.0227	0.0409	20.9271	0.3209	39.6776	0.274	0.0171	0.0164	0.2245	0.0408	99.8935	77.1674	1764.12
MF9468_Ol7	29 / 1 .	Phenocryst	38.2725	0.0137	0.0629	20.6222	0.2804	40.1669	0.2673	0.0106	0	0.221	0.0462	99.9639	77.6385	1736.62
MF9468_Ol7	29 / 2 .	Phenocryst	38.501	0.0165	0.0481	20.6222	0.3143	40.4461	0.2702	0.0099	0	0.1911	0.0252	100.445	77.7585	1501.66
MF9468_Ol7	29 / 3 .	Phenocryst	38.3701	0.0148	0.0362	21.5432	0.2781	39.5645	0.266	0	0	0.2228	0.0266	100.322	76.601	1750.76
MF9468_Ol8	30 / 1 .	Phenocryst	38.2461	0.0096	0.0257	20.1771	0.2738	40.2946	0.27	0.0091	0.0141	0.2232	0.0351	99.5783	78.0694	1753.91
MF9468_Ol8	30 / 2 .	Phenocryst	38.8237	0.015	0.0245	20.6887	0.3054	39.983	0.2647	0.0036	0	0.2321	0.032	100.373	77.5026	1823.84
MF9468_Ol8	30 / 3 .	Phenocryst	36.2023	0.0324	0.0346	32.8365	0.4681	30.164	0.277	0.0453	0.0063	0.1465	0.0067	100.219	62.0849	1151.2
MF9468_Ol9	31 / 1 .	Phenocryst	38.9394	0.0248	0.0261	20.6015	0.3111	41.4337	0.2603	0.0028	0.0199	0.2091	0.0304	101.859	78.1901	1643.11
MF9468_Ol9	31 / 2 .	Phenocryst	37.4195	0.0215	0.0498	24.0542	0.3283	37.8255	0.2911	0.003	0	0.1557	0.0295	100.178	73.7056	1223.49
MF9468_Ol10	32 / 1 .	Phenocryst	38.306	0.0144	0.023	20.7085	0.2751	40.2435	0.2679	0.0155	0	0.1297	0.0345	100.018	77.599	1019.18
MF9468_Ol10	32 / 2 .	Phenocryst	38.2431	0.0082	0.0386	21.1218	0.274	40.1778	0.2609	0.0046	0	0.2065	0.0387	100.374	77.2249	1622.68
MF9468_Ol10	32 / 3 .	Phenocryst	38.1141	0.0136	0.0398	23.3618	0.3165	37.8872	0.2657	0.0271	0.0136	0.2109	0.035	100.285	74.2988	1657.25
MF9468_Ol11	33 / 1 .	Microphenocryst	38.9693	0.008	0.0404	18.8982	0.249	41.8184	0.2409	0.0129	0	0.2481	0.041	100.526	79.7754	1949.57
MF9468_Ol11	33 / 2 .	Microphenocryst	37.4308	0.0466	0.0368	25.0091	0.3201	37.8956	0.2479	0.0219	0.0084	0.1881	0.0297	101.235	72.9807	1478.09
MF9468_Ol12	34 / 1 .	Microphenocryst	38.4412	0.0132	0.0509	18.7906	0.269	41.5973	0.2551	0.0112	0	0.2143	0.0446	99.6874	79.782	1683.97
MF9468_Ol12	34 / 2 .	Microphenocryst	48.2381	0.8519	7.9499	7.8569	0.1015	9.9064	3.4967	1.2156	1.6102	0	0.0016	81.2287	69.2074	0
MF9469_Ol1	11 / 1 .	Phenocryst	39.4345	0.0023	0.0757	15.2974	0.188	44.0274	0.2296	0.0009	0.0138	0.354	0.0586	99.6822	83.6877	2781.73
MF9469_Ol1	11 / 2 .	Phenocryst	39.9246	0.0107	0.0731	15.3814	0.2211	44.535	0.2484	0.0018	0.0152	0.33	0.063	100.805	83.7693	2593.14
MF9469_Ol1	11 / 3 .	Phenocryst	38.6783	0.0135	0.043	17.2394	0.241	42.4711	0.242	0.0062	0	0.2693	0.0406	99.2442	81.4523	2116.16
MF9469_Ol2	12 / 1 .	Phenocryst	38.5156	0.0095	0.0379	20.9337	0.3411	40.0934	0.1949	0.0098	0.0089	0.2472	0.0239	100.416	77.345	1942.5
MF9469_Ol2	12 / 2 .	Phenocryst	38.9939	0.0245	0.0285	19.0881	0.2645	41.8538	0.1957	0.0109	0	0.2547	0.0259	100.74	79.6273	2001.43
MF9469_Ol2	12 / 3 .	Phenocryst	36.4224	0.0656	0.0767	28.8465	0.3982	31.9984	0.3166	0.0029	0	0.2065	0.0221	98.356	66.4128	1622.68
MF9469_Ol3	13 / 1 .	Microphenocryst	36.2608	0.033	0.0297	32.4127	0.4676	30.7995	0.2347	0.0016	0.0013	0.1413	0.0066	100.389	62.8782	1110.34
MF9469_Ol3	13 / 2 .	Microphenocryst	36.1372	0.0141	0.168	33.0882	0.479	30.7831	0.2463	0	0	0.1165	0	101.032	62.383	915.457
MF9469_Ol3	13 / 3 .	Microphenocryst	35.7112	0.0677	0.0302	36.0384	0.5035	28.0506	0.2674	0	0.0126	0.1259	0.009	100.817	58.1144	989.322
MF9469_Ol4	14 / 1 .	Phenocryst	39.7017	0.0098	0.059	17.757	0.2682	42.5211	0.2445	0.0054	0	0.3694	0.0487	100.985	81.0193	2902.75
MF9469_Ol4	14 / 2 .	Phenocryst	39.2387	0.0175	0.0584	15.9648	0.1898	43.9018	0.2389	0	0	0.311	0.0549	99.9759	83.0562	2443.84
MF9469_Ol4	14 / 3 .	Phenocryst	36.6712	0.0332	0.035	28.9261	0.3869	33.3295	0.2497	0	0.0034	0.098	0.0168	99.7498	67.2551	770.084
MF9469_Ol5	15 / 1 .	Groundmass	36.1491	0.0234	0.0275	34.8696	0.4986	28.9808	0.2642	0.0046	0	0.1324	0	100.95	59.702	1040.4
MF9469_Ol5	15 / 2 .	Groundmass	35.7525	0.0548	0.008	35.2731	0.4784	29.1388	0.237	0.012	0	0.1029	0	101.057	59.5559	808.588
MF9469_Ol6	16 / 1 .	Phenocryst	39.4841	0.0228	0.0452	16.8327	0.2464	43.5547	0.2479	0.0133	0	0.328	0.0536	100.829	82.1822	2577.42
MF9469_Ol6	16 / 2 .	Phenocryst	38.6926	0.0126	0.031	18.8973	0.2237	41.6154	0.2406	0.0197	0	0.2622	0.0314	100.026	79.6976	2060.37
MF9469_Ol6	16 / 3 .	Phenocryst	36.8988	0.0251	0.0291	25.3431	0.3109	36.337	0.2565	0	0.0087	0.2107	0.03	99.4499	71.8772	1655.68
MF9469_Ol7	17 / 1 .	Phenocryst	38.6687	0.0291	0.0505	21.7511	0.2996	39.3722	0.2678	0	0	0.3347	0.0396	100.813	76.3406	2630.07
MF9469_Ol7	17 / 2 .	Phenocryst	39.1133	0.0152	0.0481	17.4556	0.212	42.8955	0.2335	0	0	0.3343	0.045	100.353	81.4142	2626.93
MF9469_Ol7	17 / 3 .	Phenocryst	49.7385	0.088	30.6594	1.026	0.0251	0.0884	12.5788	3.3715	0.2102	0	0.0175	97.8035	13.3137	0
MF9469_Ol8	18 / 1 .	Phenocryst	39.6621	0.0078	0.0462	15.7736	0.2249	44.3353	0.246	0.0158	0	0.3498	0.0497	100.711	83.3618	2748.73
MF9469_Ol8	18 / 2 .	Phenocryst	39.5635	0	0.0491	15.8884	0.1891	44.2437	0.2403	0.0141	0.0078	0.3267	0.0412	100.564	83.2321	2567.21
MF9469_Ol8	18 / 3 .	Phenocryst	36.8689	0.0184	0.0392	26.4589	0.3796	35.0177	0.2441	0.0032	0.0123	0.2549	0.0337	99.3309	70.2307	2003
MF9469_Ol9	19 / 1 .	Phenocryst	39.9928	0.0127	0.0473	15.3435	0.1807	44.348	0.2268	0.02	0	0.3635	0.0503	100.586	83.7456	2856.38
MF9469_Ol9	19 / 2 .	Phenocryst	40.1429	0.0209	0.0617	16.0934	0.2032	44.156	0.2329	0	0	0.286	0.0501	101.247	83.0245	2247.39
MF9469_Ol9	19 / 3 .	Phenocryst	36.985	0.0034	0.0656	27.0347	0.4058	34.8218	0.2413	0	0.0054	0.2211	0.0311	99.8152	69.6602	1737.4
MF9469_Ol10	20 / 1 .	Phenocryst	39.9883	0.0098	0.0515	15.8386	0.2289	44.2367	0.2364	0.0076	0.0217	0.2722	0.0572	100.949	83.2737	2138.95
MF9469_Ol10	20 / 2 .	Phenocryst	39.4794	0.0062	0.0452	16.1639	0.223	43.6766	0.2322	0	0	0.285	0.0498	100.161	82.808	2239.53
MF9469_Ol10	20 / 3 .	Phenocryst	36.3241	0.022	0.3517	28.9742	0.3723	27.8942	0.5104	0	0	0.1987	0.1192	94.7669	63.1826	1561.38
MF9469_Ol11	21 / 1 .	Phenocryst	40.1235	0.0051	0.0452	16.0578	0.262	44.006	0.2493	0.0142	0	0.2802	0.0494	101.093	83.0078	2201.81
MF9469_Ol11	21 / 2 .	Phenocryst	39.3121	0.013	0.0549	19.4289	0.2434	41.457	0.2349	0.0218	0.0028	0.2623	0.0372	101.068	79.1822	2061.15
MF9469_Ol11	21 / 3 .	Phenocryst	36.6295	0.0269	0.0311	32.7512	0.4965	30.6574	0.2332	0.0247	0.0053	0.1505	0.0095	101.016	62.5271	1182.63
MF9469_Ol12	22 / 1 .	Phenocryst	39.9888	0.0233	0.0536	15.934	0.203	44.0105	0.2318	0.0064	0.0231	0.3379	0.0613	100.874	83.1181	2655.22
MF9469_Ol12	22 / 2 .	Phenocryst	38.755	0.0155	0.0623	21.7709	0.2893	38.5549	0.2414	0.0047	0.0087	0.255	0.0318	99.9894	75.943	2003.79
MF9469_Ol12	22 / 3 .	Phenocryst	53.8201	0.1278	28.8618	1.2704	0.0184	0.0946	10.3466	4.5182	0.3159	0.0101	0.0007	99.3845	11.7183	79.3658
MF9469_ol13	16 / 1 .	Phenocryst	39.117	0.0127	0.0782	17.0703	0.2513	42.3033	0.2461	0.0085	0.0006	0.2952	0.0451	99.4283	81.5413	2319.68
MF9469_ol13	16 / 2 .	Phenocryst	39.2461	0.0241	0.068	15.7918	0.1925	44.5603	0.2544	0	0.0041	0.3582	0.037	100.536	83.416	2814.74
MF9469_ol13	16 / 3 .	Phenocryst	37.1506	0.0187	0.04	25.7338	0.403	36.2806	0.2121	0	0.0004	0.2224	0.0232	100.085	71.5353	1747.62
MF9469_ol14	17 / 1 .	Phenocryst	37.9214	0.0198	0.0633	17.8727	0.2617	42.4706	0.2553	0.0149	0	0.3259	0.046	99.2515	80.9009	2560.92
MF9469_ol14	17 / 2 .	Phenocryst	38.4519	0.0137	0.0506	15.7024	0.2511	44.2217	0.258	0	0	0.3145	0.0553	99.3192	83.389	2471.34
MF9469_ol14	17 / 3 .	Phenocryst	38.9966	0.0146	0.0701	16.2339	0.2381	43.5338	0.251	0.0093	0.0006	0.3458	0.0499	99.7437	82.6996	2717.3
MF9469_ol15	18 / 1 .	Phenocryst	38.7721	0.0101	0.0774	15.4351	0.1892	44.5729	0.2524	0.0096	0	0.2812	0.0443	99.6444	83.7335	2209.67
MF9469_ol15	18 / 2 .	Phenocryst	39.5068	0.0128	0.0777	15.2084	0.1735	44.8929	0.2393	0	0	0.3516	0.061	100.524	84.0302	2762.87
MF9469_ol15	18 / 3 .	Phenocryst	36.6822	0.023	0.0224	27.6555	0.3982	33.8263	0.1951	0	0	0.1699	0.0092	98.9818	68.5564	1335.07
MF9469_ol16	19 / 1 .	Phenocryst	38.7591	0.0189	0.0802	15.6025	0.2243	44.0893	0.2449	0	0	0.3496	0.0527	99.4216	83.4358	2747.16
MF9469_ol16	19 / 2 .	Phenocryst	39.0507	0.0071	0.0614	15.153	0.1919	44.3707	0.2344	0.006	0	0.3263	0.063	99.4644	83.9219	2564.07
MF9469_ol16	19 / 3 .	Phenocryst	38.0284	0.0169	0.0553	21.4843	0.3381	38.634	0.2364	0	0.0005	0.2042	0.0426	99.0408	76.2214	1604.6
MF9469_ol17	20 / 1 .	Phenocryst	39.2036	0.0268	0.0344	17.3992	0.2296	43.2711	0.2566	0	0.0161	0.3552	0.0524	100.845	81.5944	2791.16
MF9469_ol17	20 / 2 .	Phenocryst	38.5063	0.0107	0.0305	16.1751	0.237	43.9365	0.2689	0	0.0098	0.3015	0.0316	99.5078	82.8824	2369.19
MF9469_ol17	20 / 3 .	Phenocryst	38.8364	0.0226	0.0395	15.9144	0.2252	43.6568	0.2508	0.0135	0.0153	0.2872	0.0563	99.3181	83.0219	2256.82
MF9469_ol18	21 / 1 .	Phenocryst	39.2543	0.0144	0.0511	15.7935	0.2038	44.156	0.2408	0.0117	0	0.3439	0.0445	100.114	83.288	2702.37
MF9469_ol18	21 / 2 .	Phenocryst	38.8776	0.0235	0.0702	15.8872	0.2058	44.1883	0.2647	0.0129	0	0.3244	0.0702	99.9247	83.2157	2549.14
MF9469_ol18	21 / 3 .	Phenocryst	38.0146	0.0048	0.0457	18.4059	0.2303	42.0375	0.249	0.0005	0.0083	0.2643	0.0344	99.2953	80.2808	2076.87
MF9469_ol19	22 / 1 .	Phenocryst	39.6033	0.0249	0.0706	15.6819	0.2119	44.0411	0.254	0.0002	0	0.3176	0.0467	100.252	83.3503	2495.7
MF9469_ol19	22 / 2 .	Phenocryst	39.1911	0.0091	0.066	14.9932	0.2102	44.6112	0.2432	0.0075	0	0.3533	0.0621	99.7469	84.1367	2776.23
MF9469_ol19	22 / 3 .	Phenocryst	38.5325	0.0171	0.0635	18.8425	0.2534	41.4912	0.2316	0.0147	0.0047	0.3529	0.0473	99.8514	79.6962	2773.09
MF9469_ol20	23 / 1 .	Phenocryst	38.5601	0.0067	0.0527	17.7631	0.2224	42.5957	0.2302	0	0	0.3452	0.0718	99.8479	81.041	2712.58
MF9469_ol20	23 / 2 .	Phenocryst	38.3689	0.0013	0.0598	16.415	0.2229	42.8051	0.2555	0.0014	0.0122	0.2918	0.0669	98.5009	82.2957	2292.96
MF9469_ol20	23 / 3 .	Phenocryst	37.9858	0.0084	0.0266	23.6002	0.3808	37.6377	0.2325	0	0	0.2291	0.0209	100.122	73.9775	1800.27
MF9469_ol21	24 / 1 .	Phenocryst	38.3078	0.0239	0.0613	15.9679	0.2019	43.5866	0.2398	0	0	0.3282	0.047	98.7644	82.9518	2579
MF9469_ol21	24 / 2 .	Phenocryst	38.498	0.0049	0.0642	16.0836	0.2206	43.8092	0.229	0	0	0.3088	0.0448	99.2633	82.9217	2426.55
MF9469_ol21	24 / 3 .	Phenocryst	39.2375	0.0173	0.0657	15.4408	0.2485	44.5558	0.2391	0	0.0012	0.3519	0.0498	100.208	83.7232	2765.23
MF9469_ol22	25 / 1 .	Phenocryst	39.2426	0.0269	0.043	15.1057	0.2005	44.5472	0.2476	0.0035	0.011	0.3135	0.0434	99.785	84.0174	2463.48
MF9469_ol22	25 / 2 .	Phenocryst	38.3143	0.02	0.0316	15.3818	0.2072	44.4587	0.2403	0.0139	0.0066	0.3296	0.0361	99.0401	83.7456	2590
MF9469_ol22	25 / 3 .	Phenocryst	39.1936	0.0166	0.071	16.5033	0.2039	43.0213	0.2419	0.0041	0	0.3058	0.047	99.6085	82.2909	2402.98
MF9469_ol23	26 / 1 .	Phenocryst	35.6175	0.0268	0.0229	30.0662	0.4479	32.8444	0.2422	0	0.0058	0.1289	0.0184	99.4211	66.0702	1012.9
MF9469_ol23	26 / 2 .	Phenocryst	34.6633	0.0188	0.0346	30.8405	0.512	31.6569	0.2468	0	0.0039	0.1418	0.0158	98.1344	64.6611	1114.26
MF9469_ol23	26 / 3 .	Phenocryst	35.1622	0.0179	0.0275	31.8915	0.4289	30.9117	0.2482	0	0	0.1537	0.0173	98.859	63.3403	1207.77
MF9469_ol24	27 / 1 .	Phenocryst	36.8723	0.0256	0.0577	21.4846	0.2368	40.2869	0.2662	0	0	0.2726	0.0317	99.5344	76.9721	2142.09
MF9469_ol24	27 / 2 .	Phenocryst	38.3429	0.0144	0.0403	22.9263	0.3632	38.4738	0.2513	0.0049	0.0112	0.2083	0.0344	100.671	74.9461	1636.82
MF9469_ol24	27 / 3 .	Phenocryst	35.3951	0.0307	0.0206	32.4947	0.4225	30.9047	0.2508	0	0	0.1368	0.0122	99.6682	62.8988	1074.97
MF9469_ol25	28 / 1 .	Phenocryst	38.078	0.013	0.0651	17.5624	0.2453	42.4064	0.253	0.0013	0	0.244	0.0545	98.923	81.1469	1917.35
MF9469_ol25	28 / 2 .	Phenocryst	37.6215	0.0162	0.062	15.6666	0.2098	43.7011	0.2445	0.0006	0.0179	0.3489	0.0556	97.9447	83.2561	2741.66
MF9469_ol25	28 / 3 .	Phenocryst	39.0065	0.0146	0.0444	16.8615	0.2398	43.2545	0.2485	0.0137	0.0001	0.4013	0.0529	100.138	82.0555	3153.42
MF9469_ol26	29 / 1 .	Phenocryst	38.1064	0.0104	0.0508	15.2534	0.2414	44.0494	0.23	0	0	0.2863	0.0407	98.2689	83.7338	2249.75
MF9469_ol26	29 / 2 .	Phenocryst	38.6203	0.0082	0.0434	15.6442	0.2305	44.3368	0.2419	0	0	0.2924	0.0364	99.454	83.4762	2297.68
MF9469_ol26	29 / 3 .	Phenocryst	38.174	0.0174	0.0308	17.0238	0.2289	43.2707	0.2256	0	0	0.2899	0.0543	99.3154	81.9196	2278.03
MF9469_ol27	30 / 1 .	Phenocryst	37.683	0.0268	0.0768	15.7798	0.2236	44.071	0.2386	0.0021	0.0079	0.3649	0.0626	98.5371	83.2732	2867.38
MF9469_ol27	30 / 2 .	Phenocryst	38.4424	0.0074	0.0576	16.0097	0.2482	44.1711	0.2475	0.0105	0	0.3394	0.0542	99.5879	83.1027	2667.01
MF9469_ol27	30 / 3 .	Phenocryst	37.4634	0.0187	0.0527	20.3909	0.252	40.2456	0.2561	0	0	0.2739	0.0315	98.9848	77.8674	2152.31
MF9469_ol28	31 / 1 .	Phenocryst	39.5103	0.0213	0.0501	15.8317	0.215	43.8386	0.2333	0	0	0.2847	0.0578	100.043	83.1535	2237.17
MF9469_ol28	31 / 2 .	Phenocryst	37.0567	0.0206	0.0357	23.0398	0.35	37.9456	0.2452	0.0132	0.0036	0.2328	0.0292	98.9724	74.5921	1829.34
MF9469_ol28	31 / 3 .	Phenocryst	37.2681	0.0208	0.0361	23.6519	0.3332	37.5791	0.2388	0.0127	0	0.2479	0.0314	99.42	73.9053	1948
MF9472_Ol 1	29 / 1 .	Phenocryst	39.1354	0.0207	0.0379	19.3593	0.3142	40.7663	0.2324	0.0042	0.0237	0.2049	0.0255	100.125	78.9635	1610.1
MF9472_Ol 1	29 / 2 .	Phenocryst	38.96	0.0292	0.0435	18.0209	0.2978	40.9943	0.2402	0.0104	0.0065	0.1879	0.028	98.8187	80.2176	1476.52
MF9472_Ol 1	29 / 3 .	Phenocryst	37.636	0.0086	0.0228	24.909	0.3484	35.8828	0.233	0	0	0.1765	0.0097	99.2267	71.972	1386.94
MF9472_Ol 2	30 / 1 .	Microphenocryst	38.0621	0.0153	0.0529	24.9183	0.3337	36.1443	0.2269	0.0062	0	0.1675	0.055	99.9822	72.1108	1316.22
MF9472_Ol 2	30 / 2 .	Microphenocryst	38.6622	0.0079	0.0475	24.2042	0.3512	37.0986	0.2342	0	0.0033	0.1707	0.0434	100.823	73.206	1341.36
MF9472_Ol 3	31 / 1 .	Microphenocryst	38.8651	0.0081	0.3746	22.8781	0.2975	40.2833	0.2455	0.0183	0.0006	0.17	0.0336	103.175	75.8377	1335.86
MF9472_Ol 3	31 / 2 .	Microphenocryst	36.8971	0.0181	0.0393	28.9567	0.4069	33.617	0.229	0.0048	0	0.1608	0.0123	100.342	67.4207	1263.57
MF9472_Ol 4	32 / 1 .	Phenocryst	40.2617	0.0351	0.0546	14.7779	0.1934	44.9479	0.1605	0.0084	0.005	0.3487	0.0894	100.882	84.4279	2740.08
MF9472_Ol 4	32 / 2 .	Phenocryst	40.1098	0.0192	0.0469	15.0622	0.2105	44.9935	0.1966	0	0	0.3193	0.0798	101.038	84.1892	2509.06
MF9472_Ol 4	32 / 3 .	Phenocryst	38.5789	0.0013	0.041	19.0981	0.2801	41.4785	0.209	0.0061	0	0.3189	0.0726	100.084	79.4723	2505.92
MF9472_Ol 5	33 / 1 .	Microphenocryst	37.1824	0.0114	0.1984	26.195	0.2771	34.0494	0.3157	0.0128	0.0176	0.2183	0.0452	98.5232	69.8526	1715.4
MF9472_Ol 5	33 / 2 .	Microphenocryst	36.8099	0.0191	0.0413	30.0154	0.4308	33.0078	0.2629	0.0117	0.0123	0.1896	0.0213	100.822	66.2192	1489.88
MF9472_Ol 6	34 / 1 .	Phenocryst	39.5949	0.0325	0.0353	18.2749	0.2325	42.1883	0.2392	0.008	0.0065	0.2243	0.0325	100.869	80.45	1762.55
MF9472_Ol 6	34 / 2 .	Phenocryst	39.257	0.0022	0.0311	18.2744	0.2464	41.9762	0.2241	0	0.0003	0.197	0.0456	100.254	80.371	1548.03
MF9472_Ol 6	34 / 3 .	Phenocryst	39.7958	0.0182	0.0406	18.7415	0.2633	41.122	0.2283	0	0.0066	0.2494	0.0433	100.509	79.6385	1959.79
MF9472_Ol 7	35 / 1 .	Phenocryst	39.4823	0.0299	0.0386	16.7859	0.2613	42.8476	0.2568	0.0066	0.0162	0.2024	0.0355	99.963	81.9824	1590.46
MF9472_Ol 7	35 / 2 .	Phenocryst	40.0664	0.0234	0.0385	17.1004	0.2471	42.7341	0.2449	0	0.0118	0.2499	0.0316	100.748	81.6669	1963.71
MF9472_Ol 7	35 / 3 .	Phenocryst	37.7405	0.0264	0.0498	20.9488	0.3131	39.6611	0.2349	0.0176	0.0042	0.1944	0.036	99.2268	77.1418	1527.6
MF9472_Ol 8	36 / 1 .	Microphenocryst	39.158	0.0315	0.2686	19.2847	0.2962	41.2662	0.2173	0.0052	0.0039	0.2321	0.0274	100.791	79.2289	1823.84
MF9472_Ol 8	36 / 2 .	Microphenocryst	38.9963	0.0255	0.0326	26.1601	0.3659	35.599	0.2392	0.0041	0	0.1915	0.0183	101.632	70.8091	1504.81
MF9472_Ol 9	37 / 1 .	Phenocryst	38.2491	0.0214	0.017	23.5977	0.3246	37.6794	0.2347	0.0152	0	0.1819	0.0214	100.342	74.0008	1429.37
MF9472_Ol 9	37 / 2 .	Phenocryst	37.983	0.0269	0.0248	23.1541	0.3836	38.1337	0.2215	0.0127	0	0.1869	0.0162	100.143	74.5921	1468.66
MF9472_Ol 9	37 / 3 .	Phenocryst	38.3663	0.0072	0.0372	19.6783	0.3069	41.0625	0.2351	0.016	0.0182	0.1916	0.0158	99.9353	78.8119	1505.59
MF9472_Ol 10	38 / 1 .	Phenocryst	39.1663	0.0227	0.0362	20.6858	0.3224	39.5098	0.234	0.0081	0.0066	0.1955	0.0211	100.209	77.2968	1536.24
MF9472_Ol 10	38 / 2 .	Phenocryst	39.0978	0.0347	0.0283	18.9385	0.2471	40.7668	0.2456	0.0046	0.0071	0.2453	0.0353	99.6511	79.3265	1927.57
MF9472_Ol 10	38 / 3 .	Phenocryst	38.7682	0.0086	0.0478	21.5913	0.3257	38.5247	0.2262	0	0	0.2657	0.042	99.8002	76.0797	2087.87
MF9472_Ol 11	39 / 1 .	Phenocryst	39.736	0.019	0.0561	19.1015	0.2842	41.1243	0.2291	0	0.0135	0.2573	0.0379	100.859	79.3291	2021.86
MF9472_Ol 11	39 / 2 .	Phenocryst	39.2015	0.0247	0.0418	18.7115	0.2633	41.9624	0.2211	0.0114	0	0.2565	0.0616	100.756	79.9902	2015.58
MF9472_Ol 11	39 / 3 .	Phenocryst	37.9735	0.0094	0.0383	25.654	0.3878	36.0552	0.2431	0.0073	0	0.1714	0.0124	100.552	71.4716	1346.86
MF9472_Ol 12	40 / 1 .	Phenocryst	40.5229	0.0083	0.1328	16.1037	0.2395	43.5632	0.2202	0.0184	0.0138	0.2724	0.0709	101.166	82.8241	2140.52
MF9472_Ol 12	40 / 2 .	Phenocryst	40.1435	0.0232	0.0439	17.0571	0.2723	42.803	0.2227	0.0004	0.0057	0.2205	0.0531	100.845	81.7289	1732.69
MF9472_Ol 12	40 / 3 .	Phenocryst	38.5099	0.0071	1.0223	17.2887	0.2288	44.6241	0.2734	0.0108	0.0057	0.2538	0.0443	102.269	82.146	1994.36
MF9472_Ol 12	40 / 4 .	Phenocryst	40.105	0.0068	0.045	16.1016	0.197	43.2286	0.2215	0	0.0061	0.2734	0.0381	100.223	82.716	2148.38
MF9472_Ol 12	40 / 5 .	Phenocryst	39.0169	0.0137	0.0537	16.0985	0.211	42.6081	0.2231	0.0142	0	0.247	0.0489	98.535	82.5111	1940.93
MF9472_Ol 13	41 / 1 .	Phenocryst	39.4634	0.0239	0.065	17.4264	0.1874	43.5151	0.2483	0.0041	0.0014	0.2599	0.0431	101.238	81.6553	2042.29
MF9472_Ol 13	41 / 2 .	Phenocryst	38.8613	0.0206	0.031	17.1887	0.2307	42.2862	0.2261	0.0053	0	0.2447	0.0471	99.1416	81.4309	1922.85
MF9472_Ol 13	41 / 3 .	Phenocryst	40.1383	0.0019	0.4569	19.4478	0.2644	43.9417	0.2375	0.0057	0	0.2312	0.0461	104.772	80.1099	1816.77
MF9472_Ol 14	42 / 1 .	Phenocryst	38.7542	0.0284	0.0293	20.0613	0.3128	40.4905	0.236	0	0.0044	0.1795	0.023	100.119	78.2504	1410.51
MF9472_Ol 14	42 / 2 .	Phenocryst	39.0262	0.0297	0.0343	20.2452	0.2956	40.0995	0.2337	0.0086	0	0.2409	0.0296	100.243	77.9283	1892.99
MF9472_Ol 14	42 / 3 .	Phenocryst	38.816	0.0128	0.0297	19.8337	0.333	41.153	0.221	0.0046	0.0066	0.1765	0.0312	100.618	78.7172	1386.94
MF9472_Ol 15	43 / 1 .	Phenocryst	38.846	0.03	0.0287	19.4076	0.2389	40.9533	0.2789	0.0026	0.0012	0.1907	0.0389	100.017	78.9982	1498.52
MF9472_Ol 15	43 / 2 .	Phenocryst	38.8337	0.0288	0.0529	20.6573	0.3074	40.2253	0.2316	0.0097	0.0008	0.1965	0.0331	100.577	77.6342	1544.1
MF9472_Ol 15	43 / 3 .	Phenocryst	37.3567	0.023	0.0274	26.3813	0.3793	36.0484	0.2407	0.0064	0	0.1693	0.0162	100.649	70.8942	1330.36
MF9472_Ol 16	44 / 1 .	Phenocryst	37.2651	0.0582	0.4332	24.9061	0.3005	33.3768	0.4249	0.0115	0.0762	0.1543	0.0174	97.0241	70.4911	1212.49
MF9472_Ol 16	44 / 2 .	Phenocryst	37.7189	0.0325	0.0231	21.8855	0.3446	39.6422	0.2237	0.0222	0	0.2113	0.0273	100.131	76.3527	1660.4
MF9472_Ol 16	44 / 3 .	Phenocryst	38.7564	0.0111	0.0788	22.0143	0.3287	39.7976	0.2271	0.0149	0	0.2093	0.0473	101.486	76.3174	1644.68
MF9472_Ol 17	45 / 1 .	Microphenocryst	37.9988	0.0144	0.0421	23.0488	0.3259	38.2557	0.2387	0.0105	0	0.1528	0.057	100.145	74.7387	1200.7
MF9472_Ol 17	45 / 2 .	Microphenocryst	36.1432	0.0139	0.0295	27.1715	0.3755	35.5807	0.2445	0	0.0114	0.1881	0.0318	99.7902	70.008	1478.09
MF9472_Ol 18	46 / 1 .	Phenocryst	37.3047	0.0065	0.0344	26.0664	0.3973	36.1189	0.2623	0	0	0.1272	0.0167	100.334	71.1815	999.538
MF9472_Ol 18	46 / 2 .	Phenocryst	36.7116	0.0211	0.5945	28.7408	0.293	28.589	0.5048	0.0115	0.035	0.1167	0.0231	95.6411	63.9398	917.029
MF9472_Ol 18	46 / 3 .	Phenocryst	36.9197	0.0138	0.0164	28.6365	0.4506	34.2558	0.2652	0	0	0.1269	0.0228	100.708	68.075	997.18
MF9472_Ol 19	47 / 1 .	Phenocryst	39.914	0.0269	0.0422	16.936	0.2602	43.4475	0.2301	0.0248	0.0004	0.2579	0.0404	101.181	82.0562	2026.58
MF9472_Ol 19	47 / 2 .	Phenocryst	39.4642	0.0061	0.04	16.3224	0.2624	43.2726	0.2281	0.0038	0.0016	0.3198	0.0413	99.9623	82.5351	2512.99
MF9472_Ol 19	47 / 3 .	Phenocryst	39.0335	0.003	0.0433	17.6304	0.2508	42.9246	0.2193	0.0138	0.0255	0.2285	0.036	100.409	81.2733	1795.55
MF9472_Ol20	20 / 1 .	Phenocryst	38.783	0.02	0.056	16.778	0.24	42.56	0.239	0.013	0	0.259	0.032	98.98	81.8897	2035.22
MF9472_Ol20	20 / 2 .	Phenocryst	39.001	0.019	0.057	18.28	0.283	42.275	0.234	0.02	0.003	0.248	0.039	100.461	80.4779	1948.78
MF9472_Ol20	20 / 3 .	Phenocryst	38.658	0.01	0.037	21.327	0.309	39.186	0.228	0	0.005	0.165	0.023	99.947	76.6095	1296.57
MF9472_Ol21	21 / 1 .	Phenocryst	38.312	0.02	0.06	20.498	0.251	39.914	0.222	0	0	0.178	0.035	99.489	77.6337	1398.72
MF9472_Ol21	21 / 2 .	Phenocryst	38.043	0.01	0.046	18.814	0.28	41.016	0.21	0.008	0.004	0.255	0.041	98.727	79.5338	2003.79
MF9472_Ol21	21 / 3 .	Phenocryst	37.64	0.024	0.061	20.484	0.317	39.586	0.224	0.006	0	0.201	0.03	98.573	77.502	1579.46
MF9472_Ol22	22 / 1 .	Phenocryst	37.99	0.011	0.038	19.384	0.278	40.398	0.221	0	0	0.233	0.051	98.604	78.7911	1830.91
MF9472_Ol22	22 / 2 .	Phenocryst	38.385	0.006	0.026	20.223	0.316	40.342	0.218	0.002	0	0.198	0.041	99.756	78.0506	1555.88
MF9472_Ol22	22 / 3 .	Phenocryst	37.971	0.008	0.016	23.822	0.394	37.472	0.237	0.001	0	0.173	0.03	100.123	73.7116	1359.43
MF9472_Ol23	23 / 1 .	Phenocryst	39.225	0.003	0.08	15.831	0.253	44.486	0.217	0	0	0.236	0.078	100.41	83.3585	1854.49
MF9472_Ol23	23 / 2 .	Phenocryst	38.791	0.003	0.068	15.751	0.237	44.183	0.232	0.006	0	0.283	0.061	99.615	83.334	2223.81
MF9472_Ol23	23 / 3 .	Phenocryst	37.954	0.016	0.057	18.716	0.248	41.238	0.212	0	0.012	0.245	0.052	98.75	79.7061	1925.21
MF9472_Ol24	24 / 1 .	Phenocryst	38.537	0.01	0.042	19.657	0.284	40.68	0.24	0	0.004	0.247	0.02	99.72	78.6734	1940.93
MF9472_Ol24	24 / 2 .	Phenocryst	38.361	0.019	0.039	20.025	0.293	40.343	0.223	0.009	0.008	0.177	0.029	99.528	78.2191	1390.87
MF9472_Ol24	24 / 3 .	Phenocryst	38.362	0.02	0.045	19.13	0.225	41.483	0.222	0.014	0	0.236	0.027	99.765	79.4468	1854.49
MF9472_Ol25	25 / 1 .	Phenocryst	38.642	0.016	0.047	15.061	0.246	43.494	0.214	0.019	0.005	0.234	0.052	98.03	83.7339	1838.77
MF9472_Ol25	25 / 2 .	Phenocryst	38.922	0.011	0.035	15.858	0.219	43.292	0.216	0.002	0.018	0.212	0.036	98.823	82.9536	1665.9
MF9472_Ol25	25 / 3 .	Phenocryst	37.522	0.018	0.036	23.82	0.357	36.484	0.22	0.001	0	0.208	0.033	98.698	73.1922	1634.46
MF9472_Ol26	26 / 1 .	Phenocryst	38.437	0.017	0.052	19.051	0.288	41.043	0.206	0.006	0	0.247	0.036	99.383	79.3401	1940.93
MF9472_Ol26	26 / 2 .	Phenocryst	38.593	0.007	0.069	16.479	0.254	42.809	0.203	0.01	0	0.23	0.05	98.704	82.2402	1807.34
MF9472_Ol26	26 / 3 .	Phenocryst	38.109	0.011	0.036	21.537	0.307	38.944	0.212	0.017	0.001	0.235	0.037	99.446	76.3217	1846.63
MF9472_Ol27	27 / 1 .	Phenocryst	38.467	0.014	0.032	18.52	0.23	41.055	0.222	0.018	0.014	0.208	0.042	98.82	79.8043	1634.46
MF9472_Ol27	27 / 2 .	Phenocryst	37.943	0.022	0.044	20.085	0.289	40.043	0.221	0.017	0	0.173	0.028	98.866	78.0405	1359.43
MF9472_Ol27	27 / 3 .	Phenocryst	37.074	0.008	0.047	22.45	0.315	37.425	0.242	0	0	0.16	0.036	97.757	74.8211	1257.28
MF9472_Ol28	28 / 1 .	Phenocryst	36.856	0.019	0.029	21.837	0.275	38.247	0.267	0	0	0.131	0.035	97.696	75.7405	1029.4
MF9472_Ol28	28 / 2 .	Phenocryst	38.062	0.01	0.043	21.9	0.348	38.668	0.268	0.003	0.011	0.139	0.014	99.465	75.8884	1092.26
MF9472_Ol28	28 / 3 .	Phenocryst	36.931	0.024	0.04	26.63	0.393	35.545	0.254	0.019	0.009	0.157	0.018	100.019	70.4081	1233.71
MF9472_Ol29	29 / 1 .	Phenocryst	38.493	0.019	0.051	18.073	0.272	41.149	0.224	0.004	0	0.261	0.029	98.576	80.2315	2050.94
MF9472_Ol29	29 / 2 .	Phenocryst	38.807	0.022	0.046	18.611	0.276	40.613	0.222	0	0.001	0.166	0.034	98.799	79.5497	1304.43
MF9472_Ol29	29 / 3 .	Phenocryst	37.217	0.015	0.023	22.468	0.296	37.546	0.217	0	0.009	0.222	0.046	98.06	74.8668	1744.48
MF9472_Ol30	30 / 1 .	Phenocryst	38.659	0.009	0.05	16.262	0.221	42.874	0.2	0.005	0	0.253	0.036	98.569	82.455	1988.07
MF9472_Ol30	30 / 2 .	Phenocryst	38.631	0.003	0.052	17.171	0.217	42.24	0.221	0	0	0.223	0.054	98.813	81.4299	1752.33
MF9472_Ol30	30 / 3 .	Phenocryst	37.645	0.01	0.033	21.108	0.258	38.67	0.226	0.011	0	0.159	0.037	98.157	76.5569	1249.42
MF9472_Ol31	31 / 1 .	Phenocryst	38.194	0.016	0.049	18.028	0.282	41.576	0.212	0	0	0.18	0.043	98.581	80.434	1414.44
MF9472_Ol31	31 / 2 .	Phenocryst	38.012	0.013	0.064	16.744	0.22	42.239	0.202	0.003	0	0.254	0.057	97.807	81.8074	1995.93
MF9472_Ol31	31 / 3 .	Phenocryst	38.138	0.008	0.044	19.633	0.243	39.585	0.209	0.008	0	0.225	0.043	98.135	78.2328	1768.05
MF9472_Ol32	32 / 1 .	Phenocryst	38.299	0.02	0.038	19.053	0.268	40.665	0.233	0.002	0.007	0.218	0.032	98.835	79.1863	1713.04
MF9472_Ol32	32 / 2 .	Phenocryst	37.744	0.022	0.067	19.365	0.283	40.886	0.238	0.005	0	0.21	0.048	98.867	79.0073	1650.18
MF9472_Ol32	32 / 3 .	Phenocryst	37.965	0.003	0.049	19.989	0.273	41.214	0.246	0.014	0.005	0.196	0.035	99.989	78.6111	1540.17
MF9472_Ol33	33 / 1 .	Phenocryst	38.513	0.01	0.044	19.557	0.301	41.101	0.195	0.005	0	0.17	0.033	99.929	78.9306	1335.86
MF9472_Ol33	33 / 2 .	Phenocryst	38.926	0.006	0.055	17.114	0.263	43.297	0.191	0.005	0.013	0.191	0.04	100.102	81.8502	1500.88
MF9472_Ol33	33 / 3 .	Phenocryst	37.976	0.003	0.037	20.939	0.296	38.458	0.225	0	0	0.163	0.035	98.132	76.6025	1280.85
MF9472_Ol34	34 / 1 .	Phenocryst	38.777	0.011	0.04	15.878	0.222	43.279	0.227	0.002	0	0.253	0.032	98.72	82.9315	1988.07
MF9472_Ol34	34 / 2 .	Phenocryst	38.977	0.033	0.055	16.329	0.228	43.174	0.218	0.003	0	0.269	0.033	99.32	82.4963	2113.8
MF9472_Ol34	34 / 3 .	Phenocryst	39.35	0.007	0.037	17.415	0.181	42.97	0.214	0.014	0	0.241	0.034	100.462	81.4756	1893.78
MF9472_Ol35	35 / 1 .	Phenocryst	38.693	0.021	0.047	14.96	0.221	43.984	0.221	0.013	0	0.236	0.055	98.45	83.9767	1854.49
MF9472_Ol35	35 / 2 .	Phenocryst	39.015	0.019	0.049	15.052	0.209	43.983	0.216	0.003	0	0.273	0.041	98.861	83.8937	2145.23
MF9472_Ol35	35 / 3 .	Phenocryst	38.674	0.011	0.061	17.156	0.253	42.837	0.206	0.017	0.004	0.281	0.061	99.562	81.6543	2208.1
MF9472_Ol36	36 / 1 .	Phenocryst	39.092	0.013	0.064	16.05	0.29	43.471	0.271	0.003	0	0.248	0.044	99.546	82.8414	1948.78
MF9472_Ol36	36 / 2 .	Phenocryst	39.082	0.025	0.055	16.382	0.203	43.31	0.251	0.006	0	0.256	0.037	99.607	82.4949	2011.65
MF9472_Ol36	36 / 3 .	Phenocryst	38.556	0.007	0.054	18.435	0.263	42.364	0.222	0.015	0	0.211	0.043	100.169	80.3781	1658.04
MF9472_Ol37	37 / 1 .	Phenocryst	38.115	0.02	0.033	21.832	0.38	39.135	0.236	0.005	0.011	0.18	0.015	99.961	76.1639	1414.44
MF9472_Ol37	37 / 2 .	Phenocryst	37.85	0.017	0.049	22.735	0.295	38.542	0.233	0.013	0	0.158	0.01	99.902	75.1362	1241.56
MF9472_Ol37	37 / 3 .	Phenocryst	38.145	0.012	0.05	19.873	0.262	39.75	0.219	0	0.008	0.232	0.04	98.591	78.0964	1823.06
MF9472_Ol38	38 / 1 .	Phenocryst	38.142	0.035	0.047	21.084	0.316	39.28	0.246	0	0	0.194	0.03	99.375	76.8569	1524.45
MF9472_Ol38	38 / 2 .	Phenocryst	37.532	0.025	0.03	22.604	0.301	38.326	0.237	0.005	0.004	0.163	0.032	99.259	75.1392	1280.85
MF9472_Ol38	38 / 3 .	Phenocryst	36.297	0.019	0.037	26.751	0.338	35.083	0.238	0	0.009	0.178	0.021	98.971	70.0397	1398.72
JS19_Ol 1	48 / 1 .	Microphenocryst	37.2478	0.0243	0.0336	26.9531	0.368	35.8038	0.2591	0	0	0.1462	0.012	100.848	70.3079	1148.84
JS19_Ol 1	48 / 2 .	Microphenocryst	35.963	0.0459	0.2332	29.8342	0.3683	30.4615	0.3804	0.0255	0.0071	0.1465	0.023	97.4886	64.5394	1151.2
JS19_Ol 2	49 / 1 .	Microphenocryst	37.0957	0.0325	0.022	27.5826	0.4259	34.6805	0.2603	0.0189	0	0.105	0.0041	100.227	69.1478	825.09
JS19_Ol 2	49 / 2 .	Microphenocryst	35.9033	0.0309	0.0522	34.1414	0.5346	29.3582	0.285	0.0152	0.0179	0.0844	0.0127	100.436	60.5183	663.215
JS19_Ol 3	50 / 1 .	Microphenocryst	36.022	0.0314	0.0376	33.7693	0.5067	30.0988	0.2502	0.0155	0	0.0894	0	100.821	61.3721	702.505
JS19_Ol 3	50 / 2 .	Microphenocryst	35.1799	0.0382	0.1678	36.0589	0.6082	27.8801	0.2839	0.0052	0.0241	0.1417	0	100.388	57.9521	1113.48
JS19_Ol 4	51 / 1 .	Microphenocryst	37.5973	0.0337	0.0169	28.1726	0.3968	33.964	0.2334	0.0036	0	0.109	0.0276	100.555	68.2438	856.522
JS19_Ol 4	51 / 2 .	Microphenocryst	35.5325	0.0665	0.0153	35.9466	0.5017	27.8641	0.269	0.0018	0	0.0704	0.0021	100.27	58.0141	553.203
JS19_Ol 5	52 / 1 .	Microphenocryst	35.8734	0.0297	0.0225	32.1967	0.4807	31.2247	0.2486	0.0097	0	0.1543	0	100.24	63.353	1212.49
JS19_Ol 5	52 / 2 .	Microphenocryst	36.3301	0.0409	0.0179	31.0414	0.4885	31.4271	0.26	0	0.0121	0.1345	0.0031	99.7555	64.3456	1056.9
JS19_Ol 6	53 / 1 .	Microphenocryst	36.4176	0.0261	0.0249	31.3324	0.4168	31.4787	0.2561	0.004	0.0059	0.1305	0.001	100.094	64.169	1025.47
JS19_Ol 6	53 / 2 .	Microphenocryst	35.694	0.024	0.0262	34.1301	0.5412	29.0868	0.258	0	0.0016	0.0963	0.0007	99.8589	60.3041	756.725
JS19_Ol 7	54 / 1 .	Microphenocryst	36.5351	0.0345	0.0404	32.0988	0.4438	31.5181	0.2803	0	0.0032	0.0976	0.0076	101.059	63.6404	766.941
JS19_Ol 7	54 / 2 .	Microphenocryst	35.3373	0.0478	0.0304	35.8973	0.5927	27.8858	0.2759	0	0	0.107	0.0125	100.187	58.0665	840.806
JS19_Ol 8	55 / 1 .	Microphenocryst	37.1086	0.0294	0.0325	25.2895	0.3928	36.7651	0.2656	0	0	0.1604	0.019	100.063	72.1559	1260.42
JS19_Ol 8	55 / 2 .	Microphenocryst	37.3073	0.0256	0.0358	25.2778	0.376	36.614	0.259	0.007	0.0216	0.1945	0.0147	100.133	72.0824	1528.38
JS19_Ol 8	55 / 3 .	Microphenocryst	35.027	0.0475	0.0044	37.6281	0.6171	26.6459	0.2484	0	0.0024	0.0861	0.0111	100.318	55.7971	676.574
JS19_Ol 9	56 / 1 .	Micro/Incl	37.9216	0.0201	0.0282	23.9949	0.393	37.7551	0.2663	0.0105	0.0029	0.1335	0.0189	100.545	73.7173	1049.04
JS19_Ol 9	56 / 2 .	Micro/Incl	38.0311	0.0289	0.0469	23.961	0.369	36.2772	0.2807	0.0066	0	0.1395	0.035	99.1759	72.9642	1096.19
JS19_Ol 10	57 / 1 .	Phenocryst	37.3194	0.0321	0.0294	26.0525	0.3449	36.5295	0.2625	0.0029	0.0018	0.1734	0.0197	100.768	71.4237	1362.58
JS19_Ol 10	57 / 2 .	Phenocryst	37.1326	0.0266	0.0272	25.8971	0.3984	36.247	0.2719	0.0137	0	0.1413	0.0112	100.167	71.3874	1110.34
JS19_Ol 10	57 / 3 .	Phenocryst	37.2091	0.0384	0.0342	25.2546	0.3669	36.0784	0.2774	0.0073	0.0102	0.1584	0.0339	99.4688	71.8034	1244.71
JS19_Ol 11	58 / 1 .	Phenocryst	37.7638	0.0258	0.027	25.8171	0.3986	36.1162	0.2697	0	0.0107	0.1072	0.0101	100.546	71.3767	842.378
JS19_Ol 11	58 / 2 .	Phenocryst	37.2069	0.017	0.015	25.8656	0.3767	36.1302	0.2739	0	0	0.1193	0.0047	100.009	71.3463	937.459
JS19_Ol 11	58 / 3 .	Phenocryst	35.7269	0.0336	0.0513	34.41	0.5567	29.4038	0.2679	0.01	0.0033	0.0933	0.0153	100.572	60.368	733.151
JS19_Ol 12	59 / 1 .	Micro/Incl (in plag)	38.0593	0.0298	0.0315	22.011	0.3385	39.1912	0.2549	0.0152	0	0.162	0.0279	100.121	76.0415	1273
JS19_Ol 12	59 / 2 .	Micro/Incl (in plag)	38.31	0.0302	0.0142	22.0263	0.3186	39.3973	0.2628	0.0002	0.0091	0.1479	0.0192	100.536	76.1243	1162.2
JS19_Ol 13	60 / 1 .	Micro/Incl (in plag)	38.5873	0.019	0.023	22.036	0.3246	39.0732	0.2659	0.0046	0.0029	0.1489	0.0166	100.502	75.9658	1170.06
JS19_Ol 14	61 / 1 .	Micro/Incl (in plag)	38.0671	0.0206	0.0354	21.9941	0.3356	39.8547	0.2554	0	0.0025	0.1449	0.0251	100.735	76.3599	1138.62
JS19_Ol 15	62 / 1 .	Micro/Incl (in plag)	38.4793	0.0502	0.0144	22.2845	0.3104	38.718	0.2668	0	0.0071	0.1177	0.015	100.263	75.5924	924.887
JS19_Ol 16	63 / 1 .	Micro/Incl (in plag)	34.9396	0.0373	0.6209	21.9932	0.3504	35.535	0.2906	0.0016	0.0098	0.1567	0.0153	93.9503	74.2276	1231.35
JS19_Ol 17	64 / 1 .	Phenocryst	36.8528	0.0288	0.0126	26.0635	0.3534	24.287	0.2786	0	0.001	0.1128	0.0142	88.0047	62.4209	886.382
JS19_Ol 17	64 / 2 .	Phenocryst	37.4915	0.0274	0.0204	26.1634	0.3785	36.2775	0.2717	0.0089	0.0072	0.2084	0.0189	100.874	71.1952	1637.61
JS19_Ol 17	64 / 3 .	Phenocryst	37.3073	0.0314	0.0277	27.4587	0.4062	34.8271	0.2626	0.0146	0.0027	0.096	0.0283	100.463	69.3335	754.368
JS19_Ol 18	65 / 1 .	Microphenocryst	37.564	0.0299	0.0424	26.0019	0.342	36.2461	0.2694	0	0	0.1223	0.0073	100.625	71.3043	961.033
JS19_Ol 18	65 / 2 .	Microphenocryst	36.2644	0.0255	0.0123	32.7982	0.5204	30.5298	0.2602	0.0014	0.0081	0.0955	0.016	100.532	62.3957	750.439
JS19_Ol 19	66 / 1 .	Micro/Incl	36.9383	0.0262	0.0231	30.5712	0.4569	32.8232	0.2955	0.0042	0	0.1685	0.0215	101.329	65.6813	1324.07
JS19_Ol 20	67 / 1 .	Phenocryst	37.476	0.0248	0.0176	25.2714	0.4326	36.6822	0.2679	0	0.0034	0.1373	0.0119	100.325	72.1249	1078.9
JS19_Ol 20	67 / 2 .	Phenocryst	37.703	0.0328	0.047	25.9418	0.3529	36.4598	0.2816	0	0	0.1323	0.0201	100.971	71.4716	1039.61
JS19_Ol 20	67 / 3 .	Phenocryst	37.6525	0.0268	0.0206	26.2298	0.3903	35.9791	0.2785	0.0165	0	0.1633	0.0193	100.777	70.9733	1283.21
JS19_Ol 21	68 / 1 .	Microphenocryst	37.7699	0.0345	0.0372	25.8344	0.3698	36.2244	0.2634	0.0051	0.0042	0.1373	0.0155	100.696	71.4241	1078.9
JS19_Ol 21	68 / 2 .	Microphenocryst	34.5787	0.0841	0.0516	41.4642	0.7203	23.5749	0.2061	0	0.0186	0.1035	0.0111	100.813	50.335	813.303
JS22_Ol1	1 / 1 .	Phenocryst	38.608	0.0113	0.0513	18.3436	0.2412	41.6718	0.2622	0	0	0.2237	0.0326	99.4457	80.196	1757.83
JS22_Ol1	1 / 2 .	Phenocryst	39.0473	0.0114	0.0639	18.092	0.2451	42.174	0.2588	0.0141	0.0107	0.2628	0.0377	100.218	80.6024	2065.08
JS22_Ol1	1 / 3 .	Phenocryst	36.6186	0.0095	0.1871	30.6588	0.3276	28.2989	0.4674	0	0.0184	0.1576	0.025	96.7688	62.1977	1238.42
JS22_Ol2	2 / 1 .	Phenocryst	38.6192	0.0106	0.0612	18.5511	0.2502	42.1935	0.2532	0.0122	0	0.2382	0.0362	100.226	80.215	1871.78
JS22_Ol2	2 / 2 .	Phenocryst	38.9487	0.0206	0.0507	18.4439	0.2465	42.4003	0.2578	0.0122	0.0169	0.2663	0.0451	100.709	80.384	2092.59
JS22_Ol2	2 / 3 .	Phenocryst	38.537	0.0172	0.0779	20.4276	0.2483	40.0012	0.2944	0.0035	0.0041	0.2558	0.041	99.9078	77.7312	2010.08
JS22_Ol3	3 / 1 .	Phenocryst	39.8158	0.0102	0.102	16.4271	0.1927	43.5315	0.2213	0	0.0017	0.3135	0.0658	100.682	82.5289	2463.48
JS22_Ol3	3 / 2 .	Phenocryst	39.3923	0.0134	0.0794	17.7457	0.2484	42.6831	0.2434	0	0.0008	0.306	0.0668	100.779	81.0875	2404.55
JS22_Ol3	3 / 3 .	Phenocryst	36.281	0.0529	0.0396	32.7713	0.4782	30.4964	0.2948	0	0.0195	0.0746	0.0004	100.509	62.3892	586.207
JS22_Ol4	4 / 1 .	Phenocryst	38.744	0.0112	0.0583	17.8954	0.1984	42.406	0.2571	0	0	0.2391	0.0429	99.8525	80.8577	1878.85
JS22_Ol4	4 / 2 .	Phenocryst	38.4495	0.0134	0.0532	18.0237	0.2209	42.4125	0.2581	0.0146	0.0212	0.243	0.0363	99.7465	80.7493	1909.49
JS22_Ol4	4 / 3 .	Phenocryst	38.8547	0.013	0.049	19.8976	0.282	41.2321	0.2771	0.0019	0	0.1997	0.0637	100.871	78.6954	1569.24
JS22_Ol5	5 / 1 .	Phenocryst	39.0337	0.0233	0.0608	17.9231	0.2538	42.5213	0.2664	0.0014	0	0.254	0.0444	100.382	80.8758	1995.93
JS22_Ol5	5 / 2 .	Phenocryst	39.0753	0.0183	0.0536	17.9454	0.2895	42.6522	0.254	0	0	0.221	0.0335	100.543	80.9041	1736.62
JS22_Ol5	5 / 3 .	Phenocryst	38.9962	0.0068	0.038	18.3074	0.2302	42.541	0.2581	0	0	0.271	0.0433	100.692	80.5528	2129.52
JS22_Ol6	6 / 1 .	Phenocryst	39.6248	0.0127	0.0526	18.189	0.2471	42.2732	0.2716	0	0	0.2328	0.0325	100.936	80.5555	1829.34
JS22_Ol6	6 / 2 .	Phenocryst	39.3904	0.0184	0.0519	18.2533	0.2376	42.2407	0.2642	0.0011	0.0217	0.2177	0.0455	100.743	80.4881	1710.69
JS22_Ol6	6 / 3 .	Phenocryst	38.4095	0.017	0.2865	22.8239	0.3206	38.401	0.3444	0.0098	0.0056	0.1298	0.0372	100.785	74.9946	1019.97
JS22_Ol7	7 / 1 .	Phenocryst	39.1326	0.0309	0.0582	19.3129	0.2406	41.2788	0.267	0.0142	0	0.2513	0.0421	100.629	79.2099	1974.72
JS22_Ol7	7 / 2 .	Phenocryst	39.2621	0.0201	0.0463	19.0671	0.209	41.6409	0.2725	0.0142	0	0.2055	0.0257	100.763	79.5624	1614.82
JS22_Ol7	7 / 3 .	Phenocryst	37.5451	0.0125	0.3739	26.5799	0.3354	30.9678	0.6011	0.0068	0.0596	0.2174	0.0225	96.722	67.4989	1708.33
JS22_Ol8	8 / 1 .	Phenocryst	41.9928	3.3017	13.1526	9.2911	0.2281	10.8655	17.7237	0.3565	0	0.0869	0.0191	97.0179	67.581	682.86
JS22_Ol8	8 / 2 .	Phenocryst	38.9214	0.0141	0.0456	18.6705	0.2766	42.2522	0.2619	0	0	0.1962	0.0309	100.669	80.1351	1541.74
JS22_Ol8	8 / 3 .	Phenocryst	38.7516	0.0099	0.0299	19.4888	0.3145	41.3435	0.2884	0	0	0.257	0.0396	100.523	79.0861	2019.51
JS22_Ol9	9 / 1 .	Groundmass	34.6523	0.0346	0.0322	40.7272	0.6128	23.8714	0.3213	0.0178	0	0.0645	0.01	100.344	51.0956	506.841
JS22_Ol10	10 / 1 .	Groundmass	35.6359	0.0265	0.0364	33.9435	0.4668	29.9572	0.3017	0.0062	0.018	0.119	0.0029	100.514	61.138	935.102
JS22_Ol11	39 / 1 .	Phenocryst	38.578	0.019	0.055	18.01	0.239	42.174	0.244	0.001	0.014	0.303	0.034	99.672	80.6733	2380.97
JS22_Ol11	39 / 2 .	Phenocryst	38.182	0.007	0.056	18.162	0.221	42.173	0.237	0	0.01	0.266	0.04	99.355	80.5416	2090.23
JS22_Ol11	39 / 3 .	Phenocryst	37.596	0.015	0.049	20.869	0.279	39.546	0.259	0	0	0.199	0.037	98.849	77.1579	1563.74
JS22_Ol12	40 / 1 .	Phenocryst	38.917	0.006	0.04	17.764	0.26	42.039	0.254	0.004	0.023	0.253	0.038	99.6	80.8373	1988.07
JS22_Ol12	40 / 2 .	Phenocryst	38.922	0.009	0.059	18.046	0.209	42.145	0.238	0.006	0.012	0.273	0.024	99.942	80.6315	2145.23
JS22_Ol12	40 / 3 .	Phenocryst	38.187	0.005	0.024	18.666	0.302	40.697	0.248	0.009	0.008	0.206	0.034	98.387	79.5353	1618.75
JS22_Ol13	41 / 1 .	Phenocryst	37.136	0.02	0.139	20.476	0.289	39.284	0.298	0.013	0.005	0.178	0.046	97.884	77.375	1398.72
JS22_Ol13	41 / 2 .	Phenocryst	38.528	0.003	0.047	18.996	0.263	40.971	0.265	0	0	0.274	0.03	99.377	79.3587	2153.09
JS22_Ol13	41 / 3 .	Phenocryst	38.301	0.015	0.044	19.165	0.264	40.566	0.272	0.009	0	0.209	0.035	98.879	79.0492	1642.32
JS22_Ol14	42 / 1 .	Phenocryst	37.972	0.023	0.049	18.112	0.274	41.733	0.264	0	0	0.244	0.038	98.708	80.4202	1917.35
JS22_Ol14	42 / 2 .	Phenocryst	38.283	0.016	0.053	18.122	0.275	41.556	0.265	0	0.011	0.272	0.032	98.884	80.3444	2137.38
JS22_Ol14	42 / 3 .	Phenocryst	37.911	0.029	0.043	21.537	0.261	38.24	0.276	0	0	0.209	0.035	98.542	75.9905	1642.32
JS22_Ol15	1 / 1 .	Phenocryst	38.177	0.019	0.062	17.548	0.2	41.672	0.238	0	0.014	0.237	0.048	98.216	80.8909	1862.35
JS22_Ol15	1 / 2 .	Phenocryst	38.297	0.011	0.048	17.44	0.254	42.367	0.242	0.004	0.002	0.226	0.029	98.92	81.2395	1775.91
JS22_Ol15	1 / 3 .	Phenocryst	38.676	0.008	0.035	18.067	0.276	41.335	0.247	0.013	0.005	0.242	0.034	98.939	80.3082	1901.64
JS22_Ol16	2 / 1 .	Phenocryst	36.721	0.016	0.34	18.996	0.273	39.161	0.306	0	0	0.187	0.026	96.028	78.6087	1469.45
JS22_Ol16	2 / 2 .	Phenocryst	37.643	0.012	0.047	19.548	0.34	38.621	0.292	0.01	0.026	0.209	0.03	96.78	77.8849	1642.32
JS22_Ol16	2 / 3 .	Phenocryst	37.438	0.025	0.27	20.693	0.338	38.318	0.323	0.011	0	0.17	0.032	97.618	76.7486	1335.86
JS22_Ol17	3 / 1 .	Phenocryst	38.284	0.002	0.061	17.985	0.265	41.206	0.256	0.012	0	0.191	0.032	98.293	80.3307	1500.88
JS22_Ol17	3 / 2 .	Phenocryst	38.069	0.021	0.073	17.991	0.241	41.339	0.263	0	0.013	0.215	0.057	98.282	80.3763	1689.47
JS22_Ol17	3 / 3 .	Phenocryst	36.446	0.03	0.028	23.716	0.365	36.166	0.275	0.005	0.002	0.13	0.013	97.177	73.1062	1021.54
JS22_Ol18	4 / 1 .	Phenocryst	38.497	0	0.049	17.519	0.297	41.385	0.272	0.005	0	0.221	0.033	98.278	80.8095	1736.62
JS22_Ol18	4 / 2 .	Phenocryst	38.076	0.026	0.047	17.986	0.224	41.066	0.263	0.003	0	0.241	0.033	97.967	80.276	1893.78
JS22_Ol18	4 / 3 .	Phenocryst	36.313	0.018	0.03	27.189	0.389	33.799	0.287	0.009	0.011	0.124	0.023	98.192	68.9046	974.392
JS22_Ol19	5 / 1 .	Phenocryst	38.915	0	0.046	17.693	0.269	41.222	0.252	0	0.009	0.242	0.022	98.669	80.5941	1901.64
JS22_Ol19	5 / 2 .	Phenocryst	37.464	0.019	0.045	18.536	0.277	40.274	0.306	0	0.004	0.222	0.049	97.197	79.4789	1744.48
JS22_Ol19	5 / 3 .	Phenocryst	37.535	0.036	0.033	23.197	0.318	37.162	0.276	0.003	0	0.176	0.029	98.766	74.0642	1383.01
JS22_Ol20	6 / 1 .	Phenocryst	38.205	0.02	0.042	18.782	0.269	41.572	0.261	0.009	0.003	0.241	0.033	99.437	79.7796	1893.78
JS22_Ol20	6 / 2 .	Phenocryst	38.563	0.014	0.054	18.384	0.263	41.533	0.269	0	0	0.224	0.035	99.342	80.1079	1760.19
JS22_Ol20	6 / 3 .	Phenocryst	38.425	0.02	0.041	19.197	0.299	40.976	0.266	0.01	0.003	0.213	0.034	99.484	79.1877	1673.75
JS22_Ol21	7 / 1 .	Phenocryst	37.619	0.021	0.065	19.568	0.272	39.576	0.32	0	0.015	0.237	0.042	97.735	78.2854	1862.35
JS22_Ol21	7 / 2 .	Phenocryst	39.016	0.013	0.041	18.672	0.269	41.325	0.277	0.006	0	0.32	0.02	99.96	79.7782	2514.56
JS22_Ol21	7 / 3 .	Phenocryst	38.885	0.022	0.044	18.828	0.248	41.205	0.289	0.005	0	0.209	0.025	99.759	79.5965	1642.32
JS22_Ol22	8 / 1 .	Phenocryst	39.284	0.012	0.05	19.511	0.313	40.298	0.284	0.001	0	0.187	0.025	99.964	78.6402	1469.45
JS22_Ol22	8 / 2 .	Phenocryst	38.096	0.005	0.041	19.679	0.293	40.516	0.276	0.002	0	0.184	0.043	99.136	78.5867	1445.87
JS22_Ol22	8 / 3 .	Phenocryst	37.338	0.034	0.042	22.704	0.312	37.953	0.293	0	0	0.19	0.027	98.894	74.8731	1493.02
JS22_Ol23	9 / 1 .	Phenocryst	38.199	0.009	0.039	19.453	0.325	40.768	0.299	0.009	0.016	0.234	0.039	99.391	78.8839	1838.77
JS22_Ol23	9 / 2 .	Phenocryst	38.285	0.018	0.035	19.775	0.266	41.026	0.296	0	0	0.247	0.037	99.985	78.715	1940.93
JS22_Ol23	9 / 3 .	Phenocryst	38.261	0.007	0.033	20.501	0.312	39.537	0.302	0	0	0.19	0.033	99.177	77.4659	1493.02
JS22_Ol24	10 / 1 .	Phenocryst	38.297	0.016	0.069	18.09	0.279	41.343	0.261	0	0	0.295	0.047	98.697	80.2911	2318.11
JS22_Ol24	10 / 2 .	Phenocryst	38.656	0.01	0.075	17.977	0.228	41.772	0.248	0.01	0	0.236	0.053	99.266	80.5523	1854.49
JS22_Ol24	10 / 3 .	Phenocryst	38.129	0.005	0.04	18.933	0.259	41.09	0.258	0	0.001	0.206	0.038	98.961	79.4604	1618.75
JS22_Ol25	11 / 1 .	Phenocryst	38.177	0.016	0.049	18.156	0.25	41.768	0.264	0.014	0.01	0.269	0.04	99.013	80.3951	2113.8
JS22_Ol25	11 / 2 .	Phenocryst	39.178	0.024	0.039	17.776	0.257	41.575	0.256	0.015	0.018	0.236	0.035	99.41	80.6542	1854.49
JS22_Ol25	11 / 3 .	Phenocryst	38.438	0.016	0.035	19.116	0.284	40.556	0.261	0.009	0	0.256	0.027	98.997	79.0874	2011.65
JS22_Ol26	12 / 1 .	Phenocryst	38.327	0.031	0.049	18.431	0.267	41.222	0.27	0.011	0	0.267	0.031	98.904	79.947	2098.09
JS22_Ol26	12 / 2 .	Phenocryst	38.353	0.015	0.045	18.798	0.235	41.155	0.258	0	0	0.171	0.053	99.084	79.6026	1343.72
JS22_Ol26	12 / 3 .	Phenocryst	37.932	0.016	0.031	23.705	0.416	36.425	0.266	0.007	0.002	0.155	0.029	98.984	73.2553	1217.99
JS22_Ol27	13 / 1 .	Phenocryst	37.968	0.02	0.048	18.703	0.26	40.989	0.254	0.002	0	0.233	0.047	98.524	79.6193	1830.91
JS22_Ol27	13 / 2 .	Phenocryst	37.628	0.015	0.042	19.291	0.295	41.02	0.263	0	0	0.267	0.029	98.851	79.1248	2098.09
JS22_Ol27	13 / 3 .	Phenocryst	37.495	0.006	0.051	20.322	0.256	39.974	0.275	0.009	0	0.194	0.026	98.608	77.809	1524.45
JS22_Ol28	14 / 1 .	Phenocryst	38.355	0.007	0.032	17.826	0.258	41.674	0.231	0.013	0.012	0.304	0.03	98.742	80.6475	2388.83
JS22_Ol28	14 / 2 .	Phenocryst	38.888	0.009	0.034	17.827	0.245	41.513	0.247	0.001	0	0.283	0.033	99.08	80.5861	2223.81
JS22_Ol28	14 / 3 .	Phenocryst	38.285	0.019	0.055	18.394	0.251	41.013	0.26	0.005	0	0.198	0.043	98.524	79.8977	1555.88
JS22_Ol29	15 / 1 .	Phenocryst	47.902	0.07	31.497	0.831	0	0.159	13.889	2.504	0.076	0	0.001	96.928	25.4325	0
JS22_Ol29	15 / 2 .	Phenocryst	38.08	0.011	0.057	17.957	0.289	41.197	0.278	0.007	0	0.256	0.032	98.165	80.3518	2011.65
JS22_Ol29	15 / 3 .	Phenocryst	38.099	0.006	0.055	18.29	0.244	41.042	0.301	0.009	0.008	0.239	0.033	98.326	79.9999	1878.06
JS22_Ol30	16 / 1 .	Phenocryst	38.351	0.01	0.055	17.777	0.269	41.288	0.272	0.002	0.004	0.24	0.031	98.299	80.545	1885.92
JS22_Ol30	16 / 2 .	Phenocryst	38.844	0	0.108	17.808	0.224	41.262	0.274	0	0.002	0.231	0.037	98.789	80.5078	1815.2
JS22_Ol30	16 / 3 .	Phenocryst	38.495	0.013	0.049	17.685	0.256	41.174	0.278	0.003	0.003	0.258	0.035	98.25	80.583	2027.36
JS22_Ol31	17 / 1 .	Phenocryst	38.841	0.024	0.111	17.681	0.216	41.361	0.305	0.008	0	0.242	0.025	98.813	80.6573	1901.64
JS22_Ol31	17 / 2 .	Phenocryst	38.054	0.009	0.058	17.891	0.265	41.67	0.233	0	0	0.237	0.019	98.436	80.5891	1862.35
JS22_Ol31	17 / 3 .	Phenocryst	38.862	0.031	0.041	17.486	0.246	41.298	0.274	0	0.004	0.242	0.035	98.52	80.8061	1901.64
JS22_Ol32	18 / 1 .	Phenocryst	38.865	0.014	0.034	17.648	0.251	41.714	0.267	0.006	0	0.265	0.037	99.098	80.8185	2082.37
JS22_Ol32	18 / 2 .	Phenocryst	38.832	0.007	0.043	17.793	0.227	41.179	0.269	0.011	0	0.244	0.038	98.644	80.4894	1917.35
JS22_Ol32	18 / 3 .	Phenocryst	37.405	0.02	0.044	21.876	0.295	38.581	0.271	0.001	0.011	0.185	0.076	98.768	75.8673	1453.73
JS22_Ol33	19 / 1 .	Phenocryst	38.669	0.024	0.045	17.684	0.257	42.01	0.244	0.022	0.008	0.258	0.034	99.256	80.8964	2027.36
JS22_Ol33	19 / 2 .	Phenocryst	38.448	0.008	0.038	17.971	0.223	41.763	0.267	0	0.012	0.244	0.029	99.004	80.5542	1917.35
JS22_Ol33	19 / 3 .	Phenocryst	38.199	0.012	0.052	18.645	0.252	41.496	0.259	0.002	0	0.246	0.036	99.199	79.868	1933.07
JS23_Ol1	1 / 1 .	Microphenocryst	38.5943	0.0332	0.0449	20.0595	0.2974	39.8868	0.2786	0.0042	0	0.2931	0.021	99.5131	77.9952	2303.18
JS23_Ol1	1 / 2 .	Microphenocryst	39.1662	0.0194	0.0443	20.0005	0.2356	40.258	0.2565	0.0153	0	0.2661	0.0324	100.294	78.2041	2091.01
JS23_Ol1	1 / 3 .	Microphenocryst	38.0792	0.0229	0.0482	21.1717	0.254	39.303	0.2523	0	0	0.2367	0.0396	99.4075	76.7934	1859.99
JS23_Ol2	2 / 1 .	Phenocryst	38.9351	0.0106	0.0462	19.9474	0.2778	40.4376	0.2549	0.0142	0	0.2333	0.0338	100.191	78.325	1833.27
JS23_Ol2	2 / 2 .	Phenocryst	38.6499	0.0129	0.0528	19.3922	0.3098	40.2698	0.2558	0	0	0.2234	0.0349	99.2014	78.7308	1755.48
JS23_Ol2	2 / 3 .	Phenocryst	37.8678	0.0068	0.0381	20.1192	0.2905	40.1268	0.2482	0.0104	0.014	0.2422	0.0205	98.9845	78.0472	1903.21
JS23_Ol3	3 / 1 .	Phenocryst	38.6724	0.0244	0.0362	19.6173	0.2652	40.411	0.247	0.0124	0	0.2295	0.0184	99.5338	78.5959	1803.41
JS23_Ol3	3 / 2 .	Phenocryst	38.5726	0.0105	0.0371	19.5757	0.2803	40.5866	0.2458	0.0069	0	0.2768	0.0284	99.6206	78.7043	2175.09
JS23_Ol3	3 / 3 .	Phenocryst	37.4481	0.0188	0.1253	20.7361	0.2905	39.5887	0.2582	0.0042	0	0.2161	0.0136	98.6996	77.2892	1698.11
JS23_Ol4	4 / 1 .	Phenocryst	38.6464	0.0111	0.2215	19.2874	0.2953	40.3875	0.2502	0.0136	0	0.2507	0.0257	99.3893	78.8701	1970
JS23_Ol4	4 / 2 .	Phenocryst	38.8559	0.0012	0.0407	19.8522	0.2403	40.9602	0.2455	0.0077	0.0023	0.2066	0.0243	100.437	78.6227	1623.46
JS23_Ol4	4 / 3 .	Phenocryst	38.1932	0.009	0.0298	19.3251	0.3172	40.8848	0.2657	0.0035	0	0.3019	0.031	99.3612	79.041	2372.33
JS23_Ol5	5 / 1 .	Phenocryst	37.7821	0.0131	0.1861	19.7556	0.3156	39.6843	0.2372	0.0012	0	0.2663	0.0351	98.2765	78.1694	2092.59
JS23_Ol5	5 / 2 .	Phenocryst	39.0225	0.019	0.1262	19.0946	0.2603	41.0113	0.2547	0	0	0.2636	0.0338	100.086	79.2899	2071.37
JS23_Ol5	5 / 3 .	Phenocryst	39.4901	0.0173	0.2834	19.5168	0.2732	41.5987	0.263	0.0095	0.0091	0.2606	0.0287	101.75	79.164	2047.79
JS23_Ol6	6 / 1 .	Phenocryst	38.4828	0.0138	0.1005	19.4352	0.269	40.7381	0.2555	0.0064	0	0.2845	0.0284	99.6142	78.8869	2235.6
JS23_Ol6	6 / 2 .	Phenocryst	38.5904	0.0254	0.0433	19.3672	0.3189	41.0486	0.2472	0.011	0.0018	0.1884	0.0411	99.8832	79.0712	1480.45
JS23_Ol6	6 / 3 .	Phenocryst	38.8895	0.0118	0.5243	19.4265	0.2632	42.3005	0.3031	0.0029	0.0294	0.2425	0.0298	102.023	79.5143	1905.57
JS23_Ol7	7 / 1 .	Phenocryst	38.6232	0.0129	0.1501	19.1112	0.2628	39.9411	0.2611	0.0099	0	0.2702	0.0406	98.6833	78.8378	2123.23
JS23_Ol7	7 / 2 .	Phenocryst	38.7021	0.0233	0.0525	18.708	0.3142	40.2634	0.2619	0.0018	0	0.1977	0.0382	98.5632	79.3235	1553.53
JS23_Ol7	7 / 3 .	Phenocryst	38.8944	0	0.0408	19.6385	0.2696	40.0353	0.2722	0.0091	0.0123	0.2469	0.0343	99.4534	78.4201	1940.14
JS23_Ol8	8 / 1 .	Phenocryst	38.7998	0.0157	0.069	19.1275	0.2529	39.9489	0.2653	0.0058	0	0.2161	0.017	98.7177	78.8269	1698.11
JS23_Ol8	8 / 2 .	Phenocryst	39.0495	0.0147	0.1696	19.1765	0.271	40.0847	0.4071	0.0112	0	0.2241	0.0274	99.4358	78.8408	1760.98
JS23_Ol8	8 / 3 .	Phenocryst	39.6346	0.0176	0.1227	19.397	0.2761	41.7547	0.2541	0.008	0.0133	0.2463	0.0358	101.76	79.3268	1935.43
JS23_Ol8	8 / 4 .	Phenocryst	37.2742	0.0113	0.3767	19.2904	0.2976	39.5445	0.2522	0.0096	0.0066	0.2129	0.0364	97.3126	78.5138	1672.97
JS23_Ol9	9 / 1 .	Phenocryst	38.5218	0.0156	0.1282	19.5683	0.2813	40.6556	0.2629	0.0111	0	0.2618	0.0308	99.7372	78.7391	2057.22
JS23_Ol9	9 / 2 .	Phenocryst	38.6433	0.0208	0.0537	19.5399	0.2414	40.8134	0.2492	0.0053	0	0.2317	0.0347	99.8335	78.8282	1820.7
JS23_Ol9	9 / 3 .	Phenocryst	39.0356	0	0.0892	19.4874	0.2714	40.1673	0.2681	0.0101	0.0113	0.2067	0.0194	99.5664	78.6059	1624.25
JS23_Ol10	10 / 1 .	Phenocryst	38.9044	0.0313	0.0227	19.7353	0.3504	40.0344	0.2655	0	0.0013	0.2442	0.022	99.6115	78.3364	1918.92
JS23_Ol10	10 / 2 .	Phenocryst	38.8771	0.0069	0.05	19.7116	0.22	40.4792	0.2471	0.0042	0	0.2683	0.0405	99.905	78.5435	2108.3
JS23_Ol10	10 / 3 .	Phenocryst	38.7095	0.03	0.0563	19.5729	0.3226	40.3211	0.2648	0.01	0	0.2463	0.0326	99.5661	78.5965	1935.43
JS23_Ol11	11 / 1 .	Phenocryst	38.4032	0.0136	0.0367	19.8458	0.3077	40.1184	0.2502	0.0001	0.0042	0.2074	0.0336	99.221	78.2771	1629.75
JS23_Ol11	11 / 2 .	Phenocryst	38.0558	0.0246	0.0407	19.7467	0.241	40.0169	0.2612	0.0035	0	0.1904	0.0347	98.6155	78.3191	1496.16
JS23_Ol11	11 / 3 .	Phenocryst	38.2373	0.0156	0.0354	20.6207	0.2992	38.9661	0.2716	0.0004	0	0.2512	0.028	98.7255	77.1084	1973.93
JS23_Ol12	12 / 1 .	Microphenocryst	38.366	0.0229	0.0367	19.937	0.2721	39.9283	0.2509	0.0082	0.012	0.1865	0.0291	99.0496	78.118	1465.52
JS23_Ol12	12 / 2 .	Microphenocryst	37.5783	0.0301	0.0851	22.585	0.3064	38.2519	0.2874	0	0.0006	0.202	0.0234	99.3502	75.1187	1587.32
JS23_Ol13	13 / 1 .	Phenocryst	38.0959	0.0087	0.0488	18.7475	0.2608	40.9633	0.2508	0	0.004	0.234	0.0281	98.6419	79.5705	1838.77
JS23_Ol13	13 / 2 .	Phenocryst	38.8911	0.0195	0.0534	19.0555	0.2856	40.1776	0.2599	0.0017	0.0146	0.2912	0.0498	99.0999	78.9846	2288.25
JS23_Ol13	13 / 3 .	Phenocryst	38.173	0.0049	0.0352	19.3109	0.2556	40.8054	0.2565	0	0	0.2449	0.0283	99.1147	79.021	1924.42
JS23_Ol14	14 / 1 .	Phenocryst	38.893	0.0212	0.0534	19.8966	0.2504	40.3145	0.2548	0	0.0133	0.2668	0.0351	99.9991	78.3165	2096.51
JS23_Ol14	14 / 2 .	Phenocryst	38.2018	0.0131	0.0376	19.4297	0.2734	40.6988	0.249	0.0073	0	0.246	0.0195	99.1761	78.8756	1933.07
JS23_Ol14	14 / 3 .	Phenocryst	38.3161	0.019	0.0541	18.9482	0.2816	40.6718	0.2469	0	0	0.2401	0.0423	98.8201	79.2798	1886.71
JS23_Ol14	14 / 4 .	Phenocryst	37.798	0.028	0.0339	19.4665	0.2595	40.3786	0.2554	0.0197	0	0.2159	0.0298	98.4852	78.712	1696.54
JS23_Ol15	54 / 1 .	Phenocryst	38.497	0.006	0.049	19.962	0.25	40.926	0.25	0.007	0.003	0.251	0.033	100.235	78.5158	1972.36
JS23_Ol15	54 / 2 .	Phenocryst	38.319	0.017	0.033	19.467	0.264	40.891	0.257	0.012	0.009	0.239	0.032	99.541	78.9221	1878.06
JS23_Ol15	54 / 3 .	Phenocryst	37.415	0.018	0.072	19.691	0.292	41.976	0.242	0.005	0	0.279	0.036	100.026	79.1664	2192.38
JS23_Ol16	55 / 1 .	Phenocryst	38.417	0.018	0.042	19.451	0.243	40.873	0.242	0	0.001	0.204	0.037	99.528	78.9284	1603.03
JS23_Ol16	55 / 2 .	Phenocryst	38.374	0.009	0.054	19.135	0.308	41.219	0.253	0	0	0.232	0.024	99.609	79.3381	1823.06
JS23_Ol16	55 / 3 .	Phenocryst	38.317	0.004	0.027	19.341	0.245	40.767	0.27	0.004	0.001	0.261	0.019	99.256	78.9795	2050.94
JS23_Ol17	56 / 1 .	Phenocryst	38.751	0.023	0.044	19.757	0.37	40.419	0.25	0.004	0.017	0.276	0.024	99.935	78.4796	2168.81
JS23_Ol17	56 / 2 .	Phenocryst	38.312	0.022	0.044	19.852	0.269	40.836	0.244	0	0.013	0.253	0.024	99.869	78.5718	1988.07
JS23_Ol17	56 / 3 .	Phenocryst	38.45	0.032	0.063	19.703	0.289	41.08	0.255	0.001	0.005	0.256	0.019	100.154	78.7981	2011.65
JS23_Ol18	57 / 1 .	Phenocryst	37.996	0.02	0.048	20.127	0.271	40.375	0.25	0.018	0.001	0.221	0.031	99.359	78.146	1736.62
JS23_Ol18	57 / 2 .	Phenocryst	38.631	0.018	0.041	19.935	0.262	41.271	0.242	0.015	0.003	0.236	0.028	100.682	78.6798	1854.49
JS23_Ol18	57 / 3 .	Phenocryst	37.801	0.011	0.045	19.752	0.228	41.104	0.251	0	0	0.202	0.035	99.429	78.7663	1587.32
JS26_Ol1	15 / 1 .	Phenocryst	39.9683	0.0134	0.1012	15.6297	0.2414	43.7261	0.2353	0	0	0.332	0.0482	100.296	83.2969	2608.86
JS26_Ol1	15 / 2 .	Phenocryst	39.2848	0.0237	0.0453	15.8174	0.21	43.4341	0.2529	0	0	0.34	0.0482	99.4563	83.036	2671.72
JS26_Ol1	15 / 3 .	Phenocryst	39.2912	0.0109	0.0688	17.3894	0.2205	43.3691	0.2435	0.0122	0.0126	0.2819	0.0644	100.965	81.6368	2215.17
JS26_Ol1	15 / 4 .	Phenocryst	38.4793	0.0218	0.0395	20.5717	0.3402	39.8442	0.2614	0.0213	0.0074	0.2366	0.0243	99.8477	77.5409	1859.2
JS26_Ol2	16 / 1 .	Phenocryst	38.3751	0.0313	0.0343	20.9387	0.2965	39.9667	0.2653	0.0337	0.021	0.1763	0.034	100.173	77.2853	1385.37
JS26_Ol2	16 / 2 .	Phenocryst	38.2047	0.0043	0.0477	21.948	0.294	39.3141	0.2676	0.022	0	0.2342	0.0238	100.36	76.1506	1840.34
JS26_Ol2	16 / 3 .	Phenocryst	37.2802	0.0443	0.0226	28.5451	0.4275	33.3033	0.2663	0.0044	0.01	0.1759	0.0143	100.094	67.5292	1382.22
JS26_Ol3	17 / 1 .	Phenocryst	38.9741	0.0293	0.0424	22.7195	0.3496	37.7704	0.2937	0	0	0.1657	0.0276	100.372	74.7694	1302.07
JS26_Ol3	17 / 2 .	Phenocryst	37.3023	0.0213	0.027	23.6092	0.3687	37.6086	0.2981	0.0126	0.0068	0.1966	0.0163	99.4675	73.9552	1544.88
JS26_Ol3	17 / 3 .	Phenocryst	36.2892	0.041	0.0385	31.1858	0.5073	31.1807	0.2907	0	0	0.1064	0.008	99.6476	64.058	836.091
JS26_Ol4	18 / 1 .	Phenocryst	38.9103	0.0028	0.081	18.3326	0.2297	42.0061	0.2265	0.0057	0.0141	0.2447	0.0186	100.072	80.3321	1922.85
JS26_Ol4	18 / 2 .	Phenocryst	39.1046	0.0201	0.058	18.8561	0.2335	41.5985	0.223	0.0121	0.0101	0.3138	0.0128	100.443	79.7263	2465.84
JS26_Ol4	18 / 3 .	Phenocryst	38.044	0.0159	0.0354	26.1555	0.3847	35.1054	0.2518	0.0063	0	0.1274	0.0237	100.15	70.5233	1001.11
JS26_Ol5	19 / 1 .	Phenocryst	38.8828	0.0216	0.0629	19.4735	0.2961	41.2268	0.2215	0	0.0026	0.2414	0.0241	100.453	79.0523	1896.92
JS26_Ol5	19 / 2 .	Phenocryst	38.6923	0.018	0.0573	19.9921	0.3137	39.7008	0.239	0.0138	0.0074	0.2472	0.0406	99.3224	77.9728	1942.5
JS26_Ol5	19 / 3 .	Phenocryst	38.8701	0.0155	0.0491	22.1009	0.3297	39.2228	0.2727	0.0067	0	0.1615	0.0302	101.059	75.9819	1269.07
JS26_Ol6	20 / 1 .	Phenocryst	38.821	0.0133	0.0504	20.9009	0.3278	39.4916	0.2592	0	0	0.2082	0.028	100.1	77.1066	1636.04
JS26_Ol6	20 / 2 .	Phenocryst	38.7398	0.0193	0.0424	22.5021	0.3138	37.5557	0.2674	0.0149	0	0.1607	0.0215	99.6376	74.8431	1262.78
JS26_Ol6	20 / 3 .	Phenocryst	36.1822	0.03	0.0164	35.3891	0.5886	27.2135	0.2959	0.0216	0.0052	0.1416	0.0127	99.8968	57.8192	1112.69
JS26_Ol7	21 / 1 .	Phenocryst	38.4875	0.0163	0.0368	22.2864	0.3163	38.1712	0.2597	0.0069	0.0103	0.1859	0.0139	99.7909	75.3274	1460.8
JS26_Ol7	21 / 2 .	Phenocryst	38.44	0.0117	0.0527	20.5747	0.3004	39.3454	0.2497	0.0069	0.0191	0.1942	0.0251	99.2199	77.3181	1526.02
JS26_Ol7	21 / 3 .	Phenocryst	37.0161	0.0229	0.0453	28.7218	0.4093	33.175	0.2591	0.0119	0	0.0933	0.0105	99.7653	67.3088	733.151
JS26_Ol8	22 / 1 .	Phenocryst	37.0745	0.0298	0.0287	24.831	0.3652	36.2837	0.2688	0.0075	0.0297	0.1675	0.0133	99.0996	72.2585	1316.22
JS26_Ol8	22 / 2 .	Phenocryst	38.704	0.0185	0.0366	20.4463	0.3137	39.4895	0.2758	0.0004	0.0081	0.1884	0.0351	99.5163	77.4916	1480.45
JS26_Ol8	22 / 3 .	Phenocryst	39.1074	0.0186	2.1797	24.9341	0.3411	36.187	0.2826	0	0	0.1976	0.0189	103.267	72.1218	1552.74
JS26_Ol9	23 / 1 .	Micro/Incl (in plag)	38.3513	0.005	0.0354	21.4076	0.3249	39.6792	0.2736	0	0	0.1516	0.0244	100.253	76.7657	1191.27
JS26_Ol9	23 / 2 .	Micro/Incl (in plag)	38.8174	0.0347	0.0296	21.2268	0.3458	37.7003	0.3025	0.0046	0	0.1937	0.0166	98.672	75.9958	1522.09
JS26_Ol10	24 / 1 .	Phenocryst	38.4274	0.014	0.0845	19.6156	0.2707	40.2304	0.2539	0	0.0171	0.1929	0.0255	99.132	78.5219	1515.81
JS26_Ol10	24 / 2 .	Phenocryst	37.7008	0.0165	0.3293	19.858	0.2724	39.4486	0.2563	0.0033	0	0.2982	0.0264	98.2096	77.9789	2343.26
JS26_Ol10	24 / 3 .	Phenocryst	36.5731	0.0317	0.0126	32.4357	0.5448	29.9759	0.2932	0.0019	0	0.0753	0.0118	99.956	62.2267	591.707
JS26_Ol11	25 / 1 .	Microphenocryst	38.3846	0.0302	0.0388	21.3668	0.2272	39.5753	0.2539	0.0156	0.0127	0.1309	0.0271	100.063	76.7529	1028.61
JS26_Ol11	25 / 2 .	Microphenocryst	39.3857	0.0102	0.0338	21.4502	0.3127	40.3317	0.2571	0.0153	0.0092	0.1559	0.0254	101.987	77.0202	1225.06
JS26_Ol12	26 / 1 .	Phenocryst	39.5786	0.0195	0.0436	20.3192	0.3178	40.9799	0.2633	0.0016	0	0.1944	0.019	101.737	78.2375	1527.6
JS26_Ol12	26 / 2 .	Phenocryst	38.2853	0.0272	0.0313	20.6073	0.2706	40.2074	0.2727	0.0044	0	0.2203	0.0281	99.9545	77.6685	1731.12
JS26_Ol12	26 / 3 .	Phenocryst	36.6469	0.0284	0.0188	29.9397	0.4933	32.3786	0.2898	0.0126	0	0.114	0.0099	99.932	65.8442	895.812
JS26_Ol13	27 / 1 .	Phenocryst	38.9111	0.0045	0.0596	18.6191	0.2582	41.2781	0.2276	0.0066	0	0.2806	0.0405	99.6858	79.8056	2204.95
JS26_Ol13	27 / 2 .	Phenocryst	38.6206	0.0164	0.0594	18.8299	0.2141	40.9023	0.2407	0	0.0165	0.2664	0.0435	99.2097	79.4748	2093.37
JS26_Ol13	27 / 3 .	Phenocryst	38.1667	0.0073	0.0528	19.1872	0.2848	40.299	0.2346	0.0091	0.0016	0.2261	0.0491	98.5184	78.9203	1776.69
JS26_Ol13	27 / 4 .	Phenocryst	37.449	0.0252	0.0453	26.8953	0.4344	34.8926	0.2697	0	0.0253	0.1655	0.007	100.209	69.8122	1300.5
JS26_Ol14	43 / 1 .	Phenocryst	38.592	0.017	0.055	17.772	0.254	42.835	0.223	0	0.01	0.29	0.031	100.079	81.1193	2278.82
JS26_Ol14	43 / 2 .	Phenocryst	39.431	0.015	0.082	18.157	0.23	42.37	0.229	0.003	0.001	0.261	0.036	100.815	80.6188	2050.94
JS26_Ol14	43 / 3 .	Phenocryst	38.97	0.017	0.075	18.052	0.249	42.154	0.239	0.012	0	0.278	0.029	100.074	80.6296	2184.52
JS26_Ol15	44 / 1 .	Phenocryst	37.365	0.016	0.047	20.925	0.292	40.039	0.249	0.013	0.001	0.168	0.015	99.132	77.3285	1320.14
JS26_Ol15	44 / 2 .	Phenocryst	38.025	0.003	0.056	21.295	0.277	39.472	0.257	0.014	0.002	0.182	0.022	99.606	76.7664	1430.16
JS26_Ol15	44 / 3 .	Phenocryst	37.761	0.025	0.037	21.622	0.365	38.914	0.277	0.014	0	0.167	0.023	99.205	76.2365	1312.29
JS26_Ol16	45 / 1 .	Phenocryst	38.098	0.024	0.066	21.596	0.288	39.444	0.262	0.002	0	0.262	0.028	100.07	76.5023	2058.8
JS26_Ol16	45 / 2 .	Phenocryst	37.52	0.02	0.039	20.833	0.313	39.891	0.287	0.001	0.016	0.203	0.033	99.157	77.3409	1595.17
JS26_Ol16	45 / 3 .	Phenocryst	38.196	0.017	0.032	20.959	0.307	40.208	0.264	0.008	0.007	0.155	0.025	100.178	77.3739	1217.99
JS26_Ol17	46 / 1 .	Phenocryst	38.014	0.037	0.048	20.598	0.378	40.281	0.28	0.005	0	0.179	0.037	99.857	77.708	1406.58
JS26_Ol17	46 / 2 .	Phenocryst	38.077	0.015	0.04	21.489	0.284	39.842	0.278	0.014	0	0.229	0.033	100.302	76.771	1799.48
JS26_Ol17	46 / 3 .	Phenocryst	38.216	0.022	0.037	21.516	0.276	39.974	0.274	0.003	0.011	0.185	0.027	100.541	76.8076	1453.73
JS26_Ol18	47 / 1 .	Phenocryst	37.84	0.011	0.051	21.769	0.336	39.866	0.257	0	0	0.263	0.019	100.412	76.5502	2066.65
JS26_Ol18	47 / 2 .	Phenocryst	37.918	0.016	0.045	21.789	0.286	39.162	0.259	0.003	0.008	0.117	0.021	99.624	76.2122	919.386
JS26_Ol18	47 / 3 .	Phenocryst	36.692	0.014	0.038	29.95	0.504	32.555	0.272	0.002	0	0.129	0.005	100.161	65.9586	1013.68
JS26_Ol19	48 / 1 .	Phenocryst	38.508	0.018	0.049	20.592	0.34	40.434	0.258	0.013	0.019	0.16	0.025	100.416	77.7787	1257.28
JS26_Ol19	48 / 2 .	Phenocryst	38.072	0.022	0.027	20.38	0.283	40.282	0.246	0	0	0.227	0.03	99.568	77.8922	1783.77
JS26_Ol19	48 / 3 .	Phenocryst	37.526	0.017	0.028	21.568	0.311	39.513	0.275	0.003	0.01	0.181	0.024	99.455	76.557	1422.3
JS26_Ol20	49 / 1 .	Phenocryst	38.417	0.027	0.044	21.412	0.316	39.15	0.272	0.011	0	0.233	0.022	99.904	76.5217	1830.91
JS26_Ol20	49 / 2 .	Phenocryst	38.24	0.018	0.05	20.314	0.274	40.148	0.266	0.012	0.022	0.152	0.017	99.512	77.8907	1194.42
JS26_Ol20	49 / 3 .	Phenocryst	36.608	0.016	0.021	29.021	0.402	33.067	0.286	0	0	0.097	0.012	99.53	67.0083	762.226
JS26_Ol21	50 / 1 .	Phenocryst	38.054	0.013	0.038	20.509	0.283	39.759	0.279	0.013	0	0.184	0.012	99.143	77.5567	1445.87
JS26_Ol21	50 / 2 .	Phenocryst	37.985	0.028	0.044	21.671	0.285	40.006	0.257	0.008	0.012	0.202	0.026	100.524	76.6938	1587.32
JS26_Ol21	50 / 3 .	Phenocryst	35.732	0.029	0.039	29.533	0.433	32.967	0.292	0.006	0	0.155	0.003	99.188	66.5532	1217.99
JS26_Ol22	51 / 1 .	Phenocryst	38.287	0.02	0.031	20.258	0.291	40.1	0.268	0.007	0.009	0.212	0.02	99.504	77.9176	1665.9
JS26_Ol22	51 / 2 .	Phenocryst	38.034	0.001	0.037	20.752	0.322	39.833	0.275	0.002	0.012	0.196	0.04	99.503	77.3836	1540.17
JS26_Ol22	51 / 3 .	Phenocryst	37.841	0.011	0.038	22.487	0.375	38.793	0.269	0.005	0	0.131	0.015	99.964	75.4609	1029.4
JS26_Ol23	52 / 1 .	Phenocryst	37.771	0.018	0.032	20.709	0.266	39.887	0.255	0.019	0	0.196	0.03	99.181	77.4436	1540.17
JS26_Ol23	52 / 2 .	Phenocryst	38.281	0.014	0.04	21.002	0.321	39.774	0.266	0	0	0.134	0.034	99.865	77.1472	1052.97
JS26_Ol23	52 / 3 .	Phenocryst	35.475	0.169	0.014	33.968	0.541	29.187	0.224	0.008	0.013	0.057	0.07	99.727	60.5002	447.906
JS26_Ol24	53 / 1 .	Phenocryst	38.39	0.012	0.045	20.434	0.309	40.625	0.235	0.003	0	0.23	0.034	100.318	77.9925	1807.34
JS26_Ol24	53 / 2 .	Phenocryst	38.496	0.009	0.046	19.925	0.29	40.649	0.226	0.01	0.009	0.26	0.02	99.941	78.4324	2043.08
JS26_Ol24	53 / 3 .	Phenocryst	36.449	0.021	0.035	31.276	0.498	31.537	0.292	0.002	0.018	0.083	0.014	100.226	64.2529	652.214
JS27_Ol1	37 / 1 .	Phenocryst	39.2659	0.0136	0.0703	18.724	0.2507	41.7837	0.2984	0.0067	0.0026	0.2219	0.0257	100.663	79.9111	1743.69
JS27_Ol1	37 / 2 .	Phenocryst	39.2555	0.0106	0.0397	18.7367	0.2543	41.6571	0.2922	0.0107	0	0.2178	0.0274	100.502	79.8514	1711.47
JS27_Ol1	37 / 3 .	Phenocryst	38.1173	0.0433	0.0453	19.97	0.3004	41.0436	0.2946	0.0263	0	0.2095	0.0273	100.078	78.5574	1646.25
JS27_Ol2	35 / 1 .	Microphenocryst	38.8038	0.0223	0.0378	20.801	0.2612	40.3369	0.2787	0.0088	0.004	0.1522	0.0234	100.73	77.5618	1195.99
JS27_Ol2	35 / 2 .	Microphenocryst	38.2418	0.015	0.0475	20.6427	0.3014	40.933	0.2799	0.0382	0	0.1592	0.0353	100.694	77.9477	1250.99
JS27_Ol3	36 / 1 .	Microphenocryst	36.3532	0.0338	0.1168	29.2488	0.4168	31.4813	0.3225	0	0	0.1194	0.0048	98.0974	65.7371	938.245
JS27_Ol3	36 / 2 .	Microphenocryst	35.782	0.0595	0.0151	35.9367	0.5827	27.8362	0.285	0.0106	0.0109	0.05	0	100.569	57.9964	392.9
JS27_Ol4	38 / 1 .	Phenocryst	38.5271	0.0192	0.0524	19.0164	0.3011	41.5766	0.2674	0.0144	0	0.2107	0.0365	100.022	79.5806	1655.68
JS27_Ol4	38 / 2 .	Phenocryst	38.939	0.0105	0.0562	19.2147	0.3077	41.4481	0.2746	0.0013	0	0.2208	0.0319	100.505	79.3608	1735.05
JS27_Ol4	38 / 3 .	Phenocryst	37.6083	0.0302	0.0267	26.6383	0.427	34.9287	0.2917	0	0.0009	0.1357	0.036	100.124	70.0358	1066.33
JS27_Ol5	39 / 1 .	Phenocryst	38.9432	0.0306	0.0414	19.067	0.2785	41.1228	0.2795	0.0033	0.0173	0.2354	0.0364	100.055	79.3581	1849.77
JS27_Ol5	39 / 2 .	Phenocryst	38.5953	0.022	0.0466	19.0348	0.3001	41.3161	0.2707	0.0047	0	0.2254	0.0348	99.8504	79.4625	1771.19
JS27_Ol5	39 / 3 .	Phenocryst	38.5829	0.0137	0.4711	25.5375	0.2386	31.4646	0.5639	0.013	0.0443	0.1621	0.0375	97.129	68.7136	1273.78
JS27_Ol6	20 / 1 .	Phenocryst	38.333	0.009	0.024	19.167	0.281	41.378	0.272	0	0	0.197	0.029	99.691	79.3738	1548.03
JS27_Ol6	20 / 2 .	Phenocryst	38.69	0.016	0.037	18.869	0.305	41.533	0.286	0	0.005	0.256	0.039	100.035	79.6897	2011.65
JS27_Ol6	20 / 3 .	Phenocryst	38.212	0.024	0.039	18.669	0.267	41.253	0.263	0.006	0	0.176	0.033	98.941	79.7526	1383.01
JS27_Ol7	21 / 1 .	Phenocryst	38.077	0.022	0.051	19.125	0.268	41.283	0.284	0.005	0.018	0.229	0.031	99.394	79.3721	1799.48
JS27_Ol7	21 / 2 .	Phenocryst	38.218	0.006	0.039	18.895	0.269	41.357	0.274	0.009	0	0.218	0.044	99.33	79.5986	1713.04
JS27_Ol7	21 / 3 .	Phenocryst	37.507	0.021	0.047	22.03	0.395	38.715	0.277	0.011	0.01	0.182	0.036	99.23	75.8023	1430.16
JS27_Ol8	22 / 1 .	Phenocryst	38.086	0.012	0.04	19.045	0.242	41.501	0.28	0	0	0.223	0.042	99.472	79.5265	1752.33
JS27_Ol8	22 / 2 .	Phenocryst	38.269	0.018	0.042	19.236	0.308	41.378	0.271	0	0	0.227	0.04	99.79	79.3149	1783.77
JS27_Ol8	22 / 3 .	Phenocryst	35.989	0.028	0.047	28.263	0.481	33.805	0.29	0	0.013	0.085	0.027	99.028	68.0724	667.93
JS27_Ol9	23 / 1 .	Phenocryst	38.499	0.01	0.064	18.652	0.274	41.709	0.271	0.009	0	0.248	0.034	99.771	79.9442	1948.78
JS27_Ol9	23 / 2 .	Phenocryst	38.025	0.009	0.044	18.926	0.248	41.782	0.255	0.006	0	0.213	0.033	99.54	79.7376	1673.75
JS27_Ol9	23 / 3 .	Phenocryst	38.295	0.018	0.054	20.576	0.305	40.163	0.27	0.014	0	0.231	0.033	99.959	77.6757	1815.2
JS27_Ol10	24 / 1 .	Phenocryst	38.75	0.006	0.027	19.08	0.269	40.623	0.274	0.008	0.001	0.225	0.023	99.285	79.1459	1768.05
JS27_Ol10	24 / 2 .	Phenocryst	37.908	0.013	0.053	19.084	0.269	40.967	0.279	0.008	0.003	0.189	0.023	98.797	79.2813	1485.16
JS27_Ol10	24 / 3 .	Phenocryst	38.882	0.004	0.033	19.997	0.282	40.576	0.276	0.005	0	0.169	0.026	100.25	78.3408	1328
JS27_Ol11	25 / 1 .	Phenocryst	38.879	0.014	0.06	18.886	0.261	41.032	0.274	0	0.01	0.215	0.025	99.656	79.4779	1689.47
JS27_Ol11	25 / 2 .	Phenocryst	38.276	0.005	0.04	18.907	0.299	41.659	0.274	0.012	0	0.239	0.034	99.744	79.7062	1878.06
JS27_Ol11	25 / 3 .	Phenocryst	38.308	0.021	0.046	19.844	0.338	40.989	0.274	0.011	0.013	0.197	0.038	100.08	78.6415	1548.03
JS27_Ol12	26 / 1 .	Phenocryst	39.094	0.022	0.044	17.912	0.253	41.932	0.261	0.014	0	0.216	0.021	99.769	80.6687	1697.33
JS27_Ol12	26 / 2 .	Phenocryst	38.375	0.012	0.042	18.738	0.253	41.733	0.254	0.011	0	0.215	0.044	99.674	79.8796	1689.47
JS27_Ol12	26 / 3 .	Phenocryst	38.54	0.01	0.04	18.868	0.255	41.287	0.276	0	0	0.155	0.056	99.487	79.5943	1217.99
JS27_Ol13	27 / 1 .	Phenocryst	38.636	0.014	0.04	19.476	0.297	40.922	0.277	0.002	0	0.173	0.025	99.862	78.927	1359.43
JS27_Ol13	27 / 2 .	Phenocryst	38.669	0.011	0.029	19.085	0.27	41.073	0.291	0.002	0	0.168	0.021	99.621	79.3228	1320.14
JS27_Ol13	27 / 3 .	Phenocryst	38.443	0.026	0.05	18.778	0.262	41.391	0.296	0.016	0.01	0.182	0.033	99.488	79.7125	1430.16
JS27_Ol14	28 / 1 .	Phenocryst	38.533	0.032	0.03	19.022	0.286	41.256	0.26	0.012	0	0.207	0.043	99.681	79.4497	1626.61
JS27_Ol14	28 / 2 .	Phenocryst	38.798	0	0.039	18.936	0.287	41.318	0.266	0	0.003	0.213	0.039	99.898	79.548	1673.75
JS27_Ol14	28 / 3 .	Phenocryst	38.577	0.022	0.021	18.785	0.299	41.004	0.297	0.016	0	0.191	0.039	99.252	79.5541	1500.88
JS27_Ol15	29 / 1 .	Phenocryst	38.395	0.004	0.05	19.011	0.281	40.582	0.267	0	0.017	0.207	0.028	98.842	79.189	1626.61
JS27_Ol15	29 / 2 .	Phenocryst	37.93	0.007	0.04	18.476	0.281	41.505	0.275	0	0.01	0.152	0.041	98.718	80.0175	1194.42
JS27_Ol15	29 / 3 .	Phenocryst	38.386	0.016	0.047	19.623	0.269	40.769	0.264	0	0.008	0.147	0.033	99.562	78.739	1155.13
JS27_Ol16	30 / 1 .	Phenocryst	38.894	0.007	0.047	18.93	0.283	41.517	0.269	0.003	0	0.238	0.038	100.224	79.6312	1870.2
JS27_Ol16	30 / 2 .	Phenocryst	38.297	0.022	0.054	19.3	0.29	41.373	0.272	0	0	0.198	0.035	99.84	79.2584	1555.88
JS27_Ol16	30 / 3 .	Phenocryst	38.221	0.037	0.036	20.894	0.3	39.917	0.283	0	0.003	0.201	0.05	99.941	77.301	1579.46
JS27_Ol17	31 / 1 .	Phenocryst	38.868	0.01	0.014	18.553	0.304	42.059	0.266	0.018	0.012	0.221	0.029	100.354	80.1626	1736.62
JS27_Ol17	31 / 2 .	Phenocryst	38.646	0.024	0.028	18.574	0.327	41.825	0.266	0.022	0	0.217	0.047	99.976	80.0557	1705.19
JS27_Ol17	31 / 3 .	Phenocryst	38.479	0.016	0.029	18.566	0.24	41.157	0.276	0.008	0.008	0.244	0.027	99.05	79.8043	1917.35
JS27_Ol18	32 / 1 .	Phenocryst	38.644	0.028	0.04	20.152	0.307	40.374	0.276	0.004	0	0.236	0.036	100.099	78.1244	1854.49
JS27_Ol18	32 / 2 .	Phenocryst	38.293	0.019	0.033	19.374	0.267	41.408	0.263	0	0.007	0.191	0.04	99.895	79.2093	1500.88
JS27_Ol18	32 / 3 .	Phenocryst	38.781	0.021	0.034	20.59	0.3	39.992	0.262	0.005	0.011	0.166	0.041	100.204	77.5898	1304.43
JS27_Ol19	33 / 1 .	Phenocryst	38.774	0.017	0.037	19.555	0.307	41.367	0.264	0.014	0	0.237	0.021	100.594	79.0393	1862.35
JS27_Ol19	33 / 2 .	Phenocryst	38.262	0.013	0.071	19.065	0.247	41.092	0.279	0.008	0	0.148	0.027	99.213	79.3476	1162.98
JS27_Ol19	33 / 3 .	Phenocryst	37.55	0.01	0.04	20.587	0.317	40.352	0.291	0	0	0.189	0.04	99.374	77.7478	1485.16
JS27_Ol20	34 / 1 .	Phenocryst	38.774	0.017	0.037	19.555	0.307	41.367	0.264	0.014	0	0.209	0.021	98.994	79.0393	1642.32
JS27_Ol20	34 / 2 .	Phenocryst	38.512	0.01	0.046	19.372	0.306	41.33	0.283	0	0	0.219	0.031	100.11	79.1799	1720.9
JS27_Ol20	34 / 3 .	Phenocryst	37.663	0.009	0.034	23.189	0.378	38.122	0.284	0.011	0.006	0.174	0.025	99.896	74.5577	1367.29
JS27_Ol21	35 / 1 .	Phenocryst	38.797	0.015	0.05	18.545	0.265	41.566	0.254	0.004	0.005	0.227	0.021	99.749	79.9813	1783.77
JS27_Ol21	35 / 2 .	Phenocryst	38.176	0.011	0.048	18.589	0.273	41.605	0.254	0.003	0	0.246	0.024	99.229	79.9584	1933.07
JS27_Ol21	35 / 3 .	Phenocryst	38.179	0.018	0.05	19.412	0.295	41.358	0.289	0.009	0	0.204	0.035	99.848	79.1571	1603.03
JS27_Ol22	36 / 1 .	Phenocryst	38.491	0.009	0.051	18.643	0.287	41.869	0.265	0.007	0.011	0.257	0.043	99.932	80.0132	2019.51
JS27_Ol22	36 / 2 .	Phenocryst	38.796	0.002	0.053	18.365	0.243	41.591	0.249	0.004	0.001	0.251	0.024	99.579	80.1466	1972.36
JS27_Ol22	36 / 3 .	Phenocryst	38.175	0.021	0.026	21.307	0.29	39.638	0.293	0	0	0.169	0.02	99.94	76.8311	1328
JS27_Ol23	37 / 1 .	Phenocryst	38.734	0.012	0.046	18.89	0.288	41.743	0.274	0	0.002	0.239	0.043	100.273	79.7533	1878.06
JS27_Ol23	37 / 2 .	Phenocryst	38.64	0.019	0.026	20.612	0.283	40.645	0.262	0.001	0	0.121	0.022	100.631	77.8518	950.818
JS27_Ol23	37 / 3 .	Phenocryst	38.227	0.023	0.048	21.37	0.276	39.809	0.277	0.006	0.001	0.186	0.033	100.256	76.8552	1461.59
JS27_Ol24	38 / 1 .	Phenocryst	38.271	0.014	0.047	19.152	0.327	41.385	0.261	0.01	0	0.232	0.034	99.733	79.3894	1823.06
JS27_Ol24	38 / 2 .	Phenocryst	38.75	0.019	0.116	18.725	0.285	41.555	0.255	0	0	0.222	0.03	99.956	79.822	1744.48
JS27_Ol24	38 / 3 .	Phenocryst	38.459	0.035	0.059	19.989	0.305	40.64	0.288	0.004	0	0.166	0.018	99.962	78.3744	1304.43
JS27_Ol25	39 / 1 .	Phenocryst	38.74	0.01	0.06	21.028	0.286	40.375	0.268	0.011	0.002	0.193	0.029	101.002	77.3889	1516.59
JS27_Ol25	39 / 2 .	Phenocryst	38.274	0	0.059	19.06	0.251	41.77	0.241	0.011	0.019	0.282	0.025	99.992	79.6187	2215.96
JS27_Ol25	39 / 3 .	Phenocryst	37.889	0.024	0.034	19.703	0.284	41.136	0.285	0.013	0	0.195	0.031	99.595	78.8208	1532.31
JS27_Ol26	40 / 1 .	Phenocryst	39.188	0.018	0.063	18.053	0.292	42.191	0.23	0.013	0.004	0.213	0.026	100.291	80.6424	1673.75
JS27_Ol26	40 / 2 .	Phenocryst	38.586	0.007	0.067	18.273	0.253	42.137	0.24	0.004	0	0.265	0.029	99.862	80.4325	2082.37
JS27_Ol26	40 / 3 .	Phenocryst	38.879	0.006	0.057	19.717	0.302	41.161	0.273	0.013	0.024	0.205	0.043	100.679	78.8191	1610.89
JS27_Ol27	41 / 1 .	Phenocryst	38.64	0	0.058	18.839	0.32	41.474	0.273	0	0	0.198	0.041	99.843	79.6925	1555.88
JS27_Ol27	41 / 2 .	Phenocryst	38.242	0.005	0.066	18.845	0.301	41.656	0.257	0.005	0.009	0.201	0.039	99.626	79.7581	1579.46
JS27_Ol27	41 / 3 .	Phenocryst	38.15	0.007	0.058	18.986	0.261	41.566	0.266	0.006	0.002	0.233	0.039	99.574	79.6024	1830.91
JS27_Ol28	42 / 1 .	Phenocryst	38.518	0.017	0.054	18.826	0.276	41.312	0.276	0.013	0	0.219	0.171	99.682	79.6403	1720.9
JS27_Ol28	42 / 2 .	Phenocryst	38.683	0.024	0.037	18.731	0.299	41.668	0.265	0.001	0.005	0.278	0.03	100.023	79.8605	2184.52
JS27_Ol28	42 / 3 .	Phenocryst	38.077	0.009	0.037	19.886	0.303	40.178	0.286	0.012	0.007	0.146	0.026	98.967	78.2679	1147.27
JS30_Ol1	28 / 1 .	Phenocryst	35.9808	0.0422	0.1323	32.518	0.5758	29.887	0.294	0.0092	0.0094	0.0237	0	99.4722	62.0972	186.235
JS30_Ol1	28 / 2 .	Phenocryst	36.8096	0.0239	0.0559	30.8553	0.4885	31.9198	0.2658	0	0	0.0584	0	100.477	64.8389	458.907
JS30_Ol1	28 / 3 .	Phenocryst	35.8503	0.0264	0.6408	31.5819	0.5736	29.436	0.3104	0	0.01	0.0741	0	98.5034	62.4263	582.278
JS30_Ol2	29 / 1 .	Phenocryst	38.9659	0.025	0.0572	21.8473	0.2827	39.1556	0.2548	0.0103	0.0048	0.1564	0.0003	100.76	76.1607	1228.99
JS30_Ol2	29 / 2 .	Phenocryst	38.2967	0.0286	0.0926	22.6326	0.3439	38.8874	0.2657	0.004	0.0179	0.1443	0.0033	100.717	75.3864	1133.91
JS30_Ol2	29 / 3 .	Phenocryst	37.1378	0.0246	0.771	26.7619	0.3943	34.6883	0.2694	0	0.007	0.0878	0.0273	100.169	69.7932	689.932
JS30_Ol3	30 / 1 .	Phenocryst	34.1336	0.0398	0.9428	39.3085	0.0939	15.9155	0.9479	0.0273	0.0959	0.0856	0.0188	91.6095	41.919	672.645
JS30_Ol3	30 / 2 .	Phenocryst	36.7806	0.0639	0.1133	21.4587	0.3303	37.1043	0.3009	0	0.011	0.1669	0.0207	96.3506	75.5035	1311.5
JS30_Ol3	30 / 3 .	Phenocryst	38.2419	0.0167	0.0395	22.2769	0.3116	38.1422	0.2551	0.0268	0	0.1908	0.027	99.5284	75.3212	1499.31
JS30_Ol3	30 / 4 .	Phenocryst	38.0325	0.03	0.027	24.1688	0.3596	36.5674	0.2554	0.0068	0.0076	0.2113	0.0204	99.6868	72.9511	1660.4
JS30_Ol4	31 / 1 .	Phenocryst	38.0251	0.0209	0.047	22.6132	0.3249	36.7521	0.2691	0.0024	0.0005	0.2325	0.0088	98.2964	74.3399	1826.99
JS30_Ol4	31 / 2 .	Phenocryst	37.5692	0.0191	0.0438	22.8144	0.3736	37.8775	0.2628	0.0012	0.0079	0.1964	0.0069	99.1727	74.7441	1543.31
JS30_Ol4	31 / 3 .	Phenocryst	37.5612	0.0232	0.03	23.8547	0.3729	37.4958	0.2486	0.0159	0.0153	0.1972	0.0074	99.8222	73.6973	1549.6
JS30_Ol5	32 / 1 .	Phenocryst	37.8265	0.0161	0.2797	21.9611	0.3384	38.8083	0.2843	0	0.0125	0.203	0.005	99.735	75.9037	1595.17
JS30_Ol5	32 / 2 .	Phenocryst	38.2408	0.0267	0.0448	22.3196	0.3243	38.757	0.2652	0.0219	0.0114	0.1629	0.0199	100.195	75.5819	1280.07
JS30_Ol5	32 / 3 .	Phenocryst	37.7637	0.0196	0.0383	21.6171	0.3197	38.9407	0.2642	0.0209	0.0055	0.162	0.0177	99.1694	76.253	1273
JS30_Ol5	32 / 4 .	Phenocryst	38.5582	0.0059	0.0913	22.4097	0.2975	38	0.2656	0.0165	0	0.1679	0.0119	99.8245	75.1409	1319.36
JS30_Ol6	33 / 1 .	Microphenocryst	36.1123	0.0343	0.1963	30.578	0.5393	31.7488	0.278	0.0083	0	0.0727	0.0113	99.5792	64.9222	571.277
JS30_Ol6	33 / 2 .	Microphenocryst	36.0672	0.0559	0.1234	32.4029	0.5498	29.2897	0.2884	0	0.0031	0.0904	0	98.8707	61.7047	710.363
JS30_Ol7	34 / 1 .	Microphenocryst	36.5259	0.025	0.0949	30.5058	0.4755	30.1972	0.3342	0	0	0.0779	0.0103	98.2467	63.8274	612.138
JS30_Ol7	34 / 2 .	Microphenocryst	36.6816	0.0539	0.109	32.8242	0.5687	29.5932	0.287	0.0128	0	0.059	0	100.189	61.6431	463.622
JS30_Ol8	35 / 1 .	Microphenocryst	35.7711	0.0605	1.7915	30.3499	0.5518	30.6294	0.3149	0.0062	0	0.0664	0.0056	99.5471	64.2726	521.771
JS30_Ol8	35 / 2 .	Microphenocryst	36.5729	0.1286	0.1657	32.7933	0.695	27.9927	0.8462	0.0062	0.0233	0.0445	0.0138	99.282	60.3427	349.681
JS30_Ol9	36 / 1 .	Microphenocryst	35.0339	0.0601	0.0815	32.0795	0.598	29.55	0.2778	0	0	0.0276	0	97.7086	62.1498	216.881
JS30_Ol9	36 / 2 .	Microphenocryst	36.8188	0.0406	0.0508	31.812	0.6575	29.984	0.3057	0	0	0.1008	0.0036	99.7738	62.6883	792.086
JS30_Ol10	37 / 1 .	Phenocryst	37.6348	0.0097	0.064	21.9033	0.32	38.1431	0.2821	0.0103	0.0132	0.1322	0.0043	98.5168	75.6347	1038.83
JS30_Ol10	37 / 2 .	Phenocryst	37.8872	0.0279	0.1138	22.119	0.3198	37.5889	0.2643	0.0041	0	0.1832	0.0244	98.5325	75.1815	1439.59
JS30_Ol10	37 / 3 .	Phenocryst	37.4336	0.03	0.2381	23.2259	0.3043	37.4371	0.2595	0.001	0.0089	0.112	0.0102	99.0606	74.1818	880.096
JS30_Ol10	37 / 4 .	Phenocryst	37.3181	0.0394	0.1453	29.6384	0.5173	32.5572	0.2752	0.004	0	0.1113	0.0108	100.617	66.1945	874.595
JS30_Ol11	38 / 1 .	Phenocryst	38.4112	0.0311	0.0598	21.7968	0.312	39.1463	0.2678	0.0114	0.0065	0.1816	0.036	100.26	76.1984	1427.01
JS30_Ol11	38 / 2 .	Phenocryst	38.4314	0.0272	0.1134	21.9747	0.3277	39.1365	0.269	0.0093	0.0026	0.1496	0.0175	100.459	76.0461	1175.56
JS30_Ol11	38 / 3 .	Phenocryst	38.7067	0.0143	0.2771	22.0667	0.3099	38.835	0.262	0.0127	0	0.1107	0.0201	100.615	75.8285	869.881
JS30_Ol11	38 / 4 .	Phenocryst	37.0483	0.0148	0.131	27.1082	0.4194	34.5982	0.2627	0.0168	0	0.1141	0.0138	99.7273	69.4663	896.598
JS30_Ol12	39 / 1 .	Microphenocryst	36.3261	0.0285	0.9738	32.6884	0.5566	28.2957	0.3573	0.0121	0.0185	0.0664	0	99.3234	60.6765	521.771
JS30_Ol12	39 / 2 .	Microphenocryst	36.086	0.0492	0.0802	32.5661	0.656	29.2103	0.29	0	0	0.0406	0.0021	98.9805	61.5217	319.035
NMSB5_ol1	1 / 1 .	Phenocryst	39.6829	0.0076	0.0568	15.702	0.232	44.2013	0.2343	0.008	0.002	0.2931	0.0652	100.485	83.3829	2303.18
NMSB5_ol1	1 / 2 .	Phenocryst	38.8627	0.0137	0.0579	15.1126	0.2184	44.8024	0.2282	0.0162	0	0.3351	0.0542	99.7013	84.0879	2633.22
NMSB5_ol1	1 / 3 .	Phenocryst	39.3171	0.0103	0.0571	16.4434	0.2208	43.7831	0.2143	0.0055	0.0151	0.3898	0.0556	100.512	82.5976	3063.05
NMSB5_ol2	2 / 1 .	Phenocryst	38.8761	0.0117	0.0584	15.077	0.1779	44.0063	0.2224	0.0172	0	0.327	0.0529	98.8268	83.8784	2569.57
NMSB5_ol2	2 / 2 .	Phenocryst	39.3467	0.0043	0.1185	15.1315	0.1987	43.9747	0.2321	0.0231	0.0037	0.3004	0.069	99.4026	83.8198	2360.54
NMSB5_ol2	2 / 3 .	Phenocryst	39.0718	0.0024	0.06	17.5257	0.2263	43.0061	0.2232	0.0087	0	0.3232	0.0504	100.498	81.3925	2539.71
NMSB5_ol3	3 / 1 .	Phenocryst	39.0594	0.0131	0.0453	14.5442	0.2001	45.0965	0.2287	0	0	0.329	0.0692	99.5854	84.6792	2585.28
NMSB5_ol3	3 / 2 .	Phenocryst	39.6039	0.0094	0.0517	13.8431	0.1668	45.3156	0.2344	0.0149	0.0048	0.3334	0.0339	99.6118	85.3699	2619.86
NMSB5_ol3	3 / 3 .	Phenocryst	39.3542	0.0184	0.0516	13.7765	0.1619	44.5493	0.2173	0.0123	0.0038	0.3547	0.0586	98.5587	85.2164	2787.23
NMSB5_ol4	4 / 1 .	Phenocryst	38.6973	0.0069	0.0489	15.6465	0.2043	43.6129	0.2164	0.0098	0.006	0.2767	0.0557	98.7814	83.2458	2174.31
NMSB5_ol4	4 / 2 .	Phenocryst	39.2518	0	0.0355	14.886	0.1987	44.219	0.2122	0.0122	0.007	0.3036	0.0543	99.1803	84.1146	2385.69
NMSB5_ol4	4 / 3 .	Phenocryst	38.6093	0.0027	0.0735	16.3433	0.2129	43.1257	0.2089	0.0101	0	0.2857	0.059	98.9312	82.4675	2245.03
NMSB5_ol5	5 / 1 .	Phenocryst	38.9137	0.0021	0.0494	16.0446	0.1778	43.5219	0.2221	0.0137	0.0021	0.3147	0.0639	99.326	82.8629	2472.91
NMSB5_ol5	5 / 2 .	Phenocryst	39.2739	0.0151	0.0569	14.2706	0.209	43.7011	0.2176	0.0047	0	0.3183	0.0631	98.1302	84.5171	2501.2
NMSB5_ol5	5 / 3 .	Phenocryst	39.1838	0.0176	0.0753	13.5909	0.2024	44.9935	0.2102	0	0	0.3278	0.0488	98.6504	85.5099	2575.85
NMSB5_ol6	6 / 1 .	Phenocryst	39.0656	0.0094	0.1357	16.2155	0.2331	43.3826	0.2342	0	0.001	0.2942	0.0592	99.6305	82.666	2311.82
NMSB5_ol6	6 / 2 .	Phenocryst	38.9195	0.0068	0.0559	15.9169	0.2184	43.7264	0.2196	0.0121	0	0.3533	0.0694	99.4983	83.0421	2776.23
NMSB5_ol6	6 / 3 .	Phenocryst	38.4533	0.0138	0.0467	17.0913	0.2278	42.7023	0.2151	0.0143	0	0.2624	0.0648	99.0918	81.6637	2061.94
NMSB5_ol7	7 / 1 .	Phenocryst	38.6759	0.0099	0.0603	15.1622	0.2232	43.9151	0.2209	0.0077	0.0037	0.3718	0.0754	98.7261	83.7739	2921.6
NMSB5_ol7	7 / 2 .	Phenocryst	38.8136	0.02	0.0569	15.4547	0.2084	43.9719	0.2164	0.0088	0	0.3258	0.0668	99.1432	83.5303	2560.14
NMSB5_ol7	7 / 3 .	Phenocryst	38.7915	0.0097	0.1033	16.2213	0.2335	42.7272	0.2101	0.0206	0	0.4101	0.0723	98.7996	82.4416	3222.57
NMSB5_ol8	8 / 1 .	Phenocryst	40.0114	0.0124	0.0579	13.5087	0.1673	45.2798	0.2082	0	0	0.3565	0.0596	99.6618	85.663	2801.38
NMSB5_ol8	8 / 2 .	Phenocryst	39.0617	0.0041	0.0595	13.7254	0.1494	45.4316	0.2112	0.0179	0	0.3869	0.0813	99.129	85.5079	3040.26
NMSB5_ol8	8 / 3 .	Phenocryst	39.0826	0.0087	0.0758	16.6045	0.2268	42.0717	0.217	0.0103	0.0106	0.3138	0.0576	98.6794	81.8727	2465.84
NMSB5_ol9	9 / 1 .	Phenocryst	39.3146	0.0124	0.0375	13.3491	0.2055	45.4616	0.2153	0.0138	0	0.3115	0.0439	98.9651	85.857	2447.77
NMSB5_ol9	9 / 2 .	Phenocryst	39.6585	0.011	0.0496	13.2172	0.2194	45.5006	0.2474	0.0074	0.0187	0.3382	0.0578	99.3258	85.9875	2657.58
NMSB5_ol9	9 / 3 .	Phenocryst	40.0305	0.0048	0.0546	13.6311	0.1726	45.3985	0.227	0.0026	0	0.3791	0.0703	99.9712	85.5841	2978.97
NMSB5_ol10	10 / 1 .	Phenocryst	39.3219	0.0188	0.0492	17.5856	0.2512	42.4365	0.2205	0.0078	0	0.2654	0.0643	100.221	81.1376	2085.51
NMSB5_ol10	10 / 2 .	Phenocryst	39.0514	0.014	0.0578	14.6792	0.1968	44.2574	0.2185	0	0.0031	0.3185	0.0657	98.8625	84.3121	2502.77
NMSB5_ol10	10 / 3 .	Phenocryst	39.1621	0.0078	0.0429	16.7165	0.2387	42.6825	0.217	0	0.0065	0.2646	0.0554	99.3941	81.9866	2079.23
NMSB5_ol11	11 / 1 .	Phenocryst	37.0897	0.0313	0.0402	23.5122	0.3757	36.9909	0.2281	0.0101	0.0011	0.1348	0.0132	98.4275	73.7148	1059.26
NMSB5_ol11	11 / 2 .	Phenocryst	37.2612	0.0321	0.0348	24.253	0.2576	37.2361	0.2326	0.0036	0.0045	0.1649	0.0098	99.4902	73.239	1295.78
NMSB5_ol11	11 / 3 .	Phenocryst	37.2596	0.0306	0.0436	24.5062	0.3395	37.2049	0.2205	0.0059	0	0.1639	0.0029	99.7776	73.0185	1287.93
NMSB5_ol12	12 / 1 .	Phenocryst	37.5391	0.0328	0.0229	23.7221	0.2958	37.3342	0.2162	0.0071	0.0035	0.2101	0.0084	99.3922	73.7216	1650.97
NMSB5_ol12	12 / 2 .	Phenocryst	37.422	0.0273	0.0281	24.3824	0.3109	37.192	0.2227	0.0101	0.001	0.1575	0.009	99.763	73.1113	1237.63
NMSB5_ol12	12 / 3 .	Phenocryst	37.3433	0.0315	0.0383	23.6475	0.3384	37.2167	0.2179	0.002	0.0119	0.1757	0.0143	99.0375	73.7216	1380.65
NMSB5_ol13	13 / 1 .	Phenocryst	39.2912	0.011	0.0393	14.2159	0.1968	44.8598	0.2405	0.0162	0	0.3444	0.0543	99.2694	84.9057	2706.3
NMSB5_ol13	13 / 2 .	Phenocryst	39.3756	0.0232	0.0477	14.3301	0.2077	45.0486	0.2351	0.0121	0.0039	0.3464	0.0548	99.685	84.857	2722.01
NMSB5_ol13	13 / 3 .	Phenocryst	39.1175	0.0065	0.0542	17.3817	0.1917	42.4501	0.2182	0	0	0.2883	0.0701	99.7784	81.3203	2265.46
NMSB5_ol14	14 / 1 .	Phenocryst	39.1786	0.0073	0.0592	16.1633	0.1948	43.9348	0.2208	0	0	0.3049	0.0669	100.131	82.8922	2395.9
NMSB5_ol14	14 / 2 .	Phenocryst	38.6097	0.0154	0.0546	16.6519	0.2494	43.0062	0.2209	0.0213	0	0.2359	0.048	99.1134	82.1547	1853.7
NMSB5_ol14	14 / 3 .	Phenocryst	38.9999	0.0111	0.0363	19.4317	0.2618	41.4577	0.2254	0	0	0.2787	0.0513	100.754	79.1801	2190.02
NMSB5_ol15	15 / 1 .	Phenocryst	39.6395	0.008	0.0561	14.6328	0.2008	45.4198	0.2031	0.005	0.0002	0.3824	0.0778	100.626	84.6931	3004.9
NMSB5_ol15	15 / 2 .	Phenocryst	38.8517	0.011	0.0434	17.8486	0.2841	42.2626	0.2219	0.0053	0.0131	0.3006	0.0705	99.9127	80.8458	2362.11
NMSB5_ol15	15 / 3 .	Phenocryst	39.0366	0.0045	0.077	19.0605	0.2384	41.7718	0.2294	0.0019	0.0077	0.3206	0.0753	100.824	79.619	2519.27
NMSB13_Ol1	40 / 1 .	Phenocryst	38.4882	0.0197	0.0413	21.5904	0.2964	38.7104	0.2611	0.0202	0	0.1947	0.0349	99.6573	76.1679	1529.95
NMSB13_Ol1	40 / 2 .	Phenocryst	39.8124	0.024	0.0645	22.0338	0.2995	39.9416	0.2492	0	0	0.1818	0.0338	102.641	76.3666	1428.58
NMSB13_Ol1	40 / 3 .	Phenocryst	38.1285	0.0141	0.0344	22.3294	0.2852	39.1274	0.2736	0.0071	0	0.2375	0.0229	100.46	75.749	1866.27
NMSB13_Ol1	40 / 4 .	Phenocryst	37.0435	0.025	0.2835	23.9922	0.3214	35.45	0.3828	0.0015	0	0.1075	0.0195	97.6269	72.4809	844.735
NMSB13_Ol2	41 / 1 .	Phenocryst	38.2194	0.0177	0.0262	23.2239	0.3506	37.5565	0.2736	0	0	0.1658	0.0205	99.8542	74.2444	1302.86
NMSB13_Ol2	41 / 2 .	Phenocryst	38.2759	0.0155	0.0429	22.2767	0.3028	39.1362	0.2684	0.0116	0.0018	0.1461	0.0381	100.516	75.7965	1148.05
NMSB13_Ol2	41 / 3 .	Phenocryst	38.4074	0.0417	0.3006	25.5826	0.431	35.4611	0.3022	0	0.0122	0.1924	0.0324	100.764	71.1888	1511.88
NMSB13_Ol3	42 / 1 .	Groundmass	37.1528	0.0808	0.025	30.4386	0.502	31.865	0.3351	0.0045	0.0008	0.094	0.0052	100.504	65.1092	738.652
NMSB13_Ol3	42 / 2 .	Groundmass	35.5014	0.0679	0.0333	39.9254	0.7431	24.5255	0.3215	0.0074	0.0058	0.0725	0.0027	101.207	52.2671	569.705
NMSB13_Ol4	43 / 1 .	Microphenocryst	37.8731	0.0252	1.2404	21.8019	0.3146	38.3105	0.2867	0.0015	0.0045	0.1535	0.0249	100.037	75.8005	1206.2
NMSB13_Ol4	43 / 2 .	Microphenocryst	37.7981	0.03	0.0378	22.7693	0.3846	38.2617	0.3104	0	0.0033	0.2164	0.029	99.8406	74.9713	1700.47
NMSB13_Ol5	44 / 1 .	Microphenocryst	38.598	0.0137	0.0266	21.4561	0.3149	39.4301	0.2777	0	0	0.2144	0.0255	100.357	76.6126	1684.76
NMSB13_Ol5	44 / 2 .	Microphenocryst	38.5386	0.0127	0.0315	22.0999	0.3164	38.7467	0.2921	0.003	0	0.2202	0.028	100.289	75.7591	1730.33
NMSB13_Ol6	45 / 1 .	Microphenocryst	37.8278	0.0311	0.038	22.1116	0.3271	39.3275	0.2782	0.0024	0	0.2375	0.0282	100.209	76.0217	1866.27
NMSB13_Ol6	45 / 2 .	Microphenocryst	34.988	0.0439	0.0232	38.3939	0.6627	25.075	0.3676	0.0091	0.0134	0.0965	0.0038	99.6771	53.7932	758.297
NMSB13_Ol7	46 / 1 .	Microphenocryst	38.0601	0.0221	0.0423	22.0098	0.3182	38.1135	0.2667	0.0005	0	0.1613	0.0265	99.0209	75.5308	1267.5
NMSB13_Ol7	46 / 2 .	Microphenocryst	37.6641	0.0321	0.0242	22.1708	0.3349	38.3032	0.2641	0.0163	0	0.2224	0.0257	99.0577	75.4879	1747.62
NMSB13_Ol8	47 / 1 .	Microphenocryst	38.4869	0.0218	0.0412	22.3567	0.3116	37.876	0.279	0.002	0.0076	0.1515	0.0196	99.5539	75.124	1190.49
NMSB13_Ol8	47 / 2 .	Microphenocryst	38.4533	0.0239	0.0246	21.748	0.3229	39.2211	0.2509	0.0112	0	0.2045	0.0226	100.283	76.2736	1606.96
NMSB13_Ol8	47 / 3 .	Microphenocryst	38.025	0.0313	0.0329	22.1885	0.3274	37.6383	0.2815	0	0	0.1525	0.0102	98.6876	75.1475	1198.35
NMSB13_Ol9	48 / 1 .	Microphenocryst	37.979	0.0122	0.0419	21.9308	0.2986	38.8392	0.269	0.0129	0.0035	0.2132	0.0261	99.6265	75.9435	1675.33
NMSB13_Ol9	48 / 2 .	Microphenocryst	38.1593	0.0232	0.0373	21.9253	0.2958	39.0131	0.2713	0.0002	0	0.1784	0.0287	99.9325	76.0296	1401.87
NMSB13_Ol9	48 / 3 .	Microphenocryst	37.1567	0.0207	0.0129	22.1281	0.2974	38.0641	0.2661	0.006	0.01	0.2201	0.0241	98.2061	75.4076	1729.55
NMSB13_Ol10	49 / 1 .	Microphenocryst	39.1599	0.0187	0.0494	21.5231	0.3344	38.8598	0.2725	0.0199	0.0039	0.1759	0.0332	100.451	76.2942	1382.22
NMSB13_Ol10	49 / 2 .	Microphenocryst	37.7182	0.0281	0.6909	25.4784	0.2752	31.2547	0.6502	0.0235	0.0682	0.169	0.0274	96.3838	68.6194	1328
NMSB13_Ol11	50 / 1 .	Microphenocryst	37.8069	0.0222	0.0267	21.7026	0.3319	38.356	0.2836	0.0141	0.0074	0.2293	0.0278	98.8085	75.9059	1801.84
NMSB13_Ol11	50 / 2 .	Microphenocryst	38.4804	0.0174	0.0243	22.0076	0.2882	38.3609	0.27	0	0.0033	0.1682	0.0226	99.643	75.6521	1321.72
NMSB13_Ol11	50 / 3 .	Microphenocryst	39.0939	0.0217	0.0292	23.359	0.3362	37.6014	0.2933	0.0108	0.0059	0.131	0.0237	100.906	74.1562	1029.4
NMSB13_Ol12	51 / 1 .	Microphenocryst	37.8808	0.0139	0.0316	22.0178	0.3187	38.474	0.2712	0.0078	0.0117	0.1566	0.0299	99.2138	75.6977	1230.56
NMSB13_Ol12	51 / 2 .	Microphenocryst	38.2225	0.0403	0.0358	23.4767	0.3457	36.5565	0.2894	0	0.0167	0.1634	0.0235	99.1705	73.5147	1284
NMSB13_Ol13	52 / 1 .	Micro/Incl (in plag)	38.9446	0.033	0.0468	21.1255	0.3162	40.1428	0.2565	0	0	0.1962	0.0276	101.089	77.2065	1541.74
NMSB13_Ol13	52 / 2 .	Micro/Incl (in plag)	34.2936	0.0204	0.2104	20.3408	0.267	38.0227	0.2581	0.0088	0	0.199	0.0322	93.6529	76.9165	1563.74
NMSB13_Ol13	52 / 3 .	Micro/Incl (in plag)	38.1975	0.0331	0.0611	20.9595	0.2713	39.2083	0.2757	0	0	0.2331	0.0179	99.2576	76.9296	1831.7
NMSB13_Ol14	53 / 1 .	Microphenocryst	37.5594	0.0186	0.0427	21.6183	0.2929	38.0904	0.2772	0.016	0.0063	0.1729	0.0238	98.1187	75.8499	1358.65
NMSB13_Ol14	53 / 2 .	Microphenocryst	37.9144	0.0219	0.0392	21.6334	0.3424	38.2466	0.2632	0.0092	0.0083	0.176	0.0244	98.6789	75.912	1383.01
NMSB13_Ol15	54 / 1 .	Microphenocryst	39.0522	0.0177	0.027	21.923	0.3528	38.6968	0.2645	0.0049	0.0074	0.1717	0.0313	100.549	75.8828	1349.22
NMSB13_Ol15	54 / 2 .	Microphenocryst	36.9585	0.0158	0.0389	28.4505	0.3794	33.1827	0.2918	0.0073	0	0.1447	0.0138	99.4834	67.5224	1137.05
NMSB13_Ol16	55 / 1 .	Microphenocryst	38.3841	0.0228	0.0277	21.6959	0.3196	38.9038	0.27	0.0038	0	0.214	0.0273	99.8688	76.1699	1681.61
NMSB13_Ol16	55 / 2 .	Microphenocryst	38.631	0.0197	0.0405	21.9193	0.2887	38.4062	0.2618	0	0	0.2239	0.035	99.8261	75.7477	1759.41
NMSB13_Ol16	55 / 3 .	Microphenocryst	37.9036	0.0153	0.0409	24.0286	0.3616	36.496	0.2695	0.0167	0.0065	0.1526	0.0142	99.3053	73.0272	1199.13
NMSB13_Ol17	56 / 1 .	Microphenocryst	38.8078	0.0266	0.0517	22.2566	0.3291	39.1562	0.2691	0.0075	0.0164	0.1938	0.0123	101.127	75.8224	1522.88
NMSB13_Ol17	56 / 2 .	Microphenocryst	38.6826	0.0273	0.0321	23.3343	0.3591	37.4813	0.2867	0.0117	0	0.1347	0.0147	100.365	74.1152	1058.47
NMSB13_Ol18	57 / 1 .	Microphenocryst	39.232	0.0146	0.0346	21.6938	0.3416	39.1292	0.2742	0	0	0.2193	0.0274	100.967	76.2763	1723.26
NMSB13_Ol18	57 / 2 .	Microphenocryst	39.09	0.0211	0.6859	22.1438	0.3244	38.5198	0.2977	0.0038	0.002	0.1549	0.0379	101.281	75.6145	1217.2
NMSB13_Ol19	58 / 1 .	Microphenocryst	38.4291	0.0229	0.0277	21.1868	0.2985	38.5881	0.2823	0	0	0.218	0.0304	99.0838	76.4518	1713.04
NMSB13_Ol19	58 / 2 .	Microphenocryst	37.7608	0.0267	0.0301	22.0665	0.2999	38.1306	0.2764	0.0102	0.0009	0.2198	0.0289	98.8508	75.4916	1727.19
NMSB13_Ol20	59 / 1 .	Phenocryst	38.2838	0.0127	0.0411	22.0362	0.3175	38.5551	0.2822	0.0054	0	0.1856	0.0324	99.752	75.7211	1458.44
NMSB13_Ol20	59 / 2 .	Phenocryst	38.8404	0.0216	0.0379	21.9511	0.3584	38.9954	0.2727	0.0094	0.0029	0.2367	0.0287	100.755	75.9999	1859.99
NMSB13_Ol20	59 / 3 .	Phenocryst	39.0012	0.0281	0.0275	22.4929	0.3413	38.5288	0.2728	0.0102	0.0018	0.1283	0.0217	100.855	75.3293	1008.18
NMSB13_Ol21	60 / 1 .	Microphenocryst	38.8111	0.0204	0.0472	22.4364	0.3226	38.601	0.2646	0.0094	0.0123	0.1476	0.0239	100.696	75.4107	1159.84
NMSB13_Ol21	60 / 2 .	Microphenocryst	37.0967	0.0284	0.0227	29.062	0.4259	33.1326	0.3087	0.0095	0	0.0931	0.0133	100.193	67.0209	731.58
NMSB13_Ol22	61 / 1 .	Microphenocryst	39.118	0.0294	0.0481	21.7645	0.3177	39.2073	0.2568	0.0127	0	0.223	0.0305	101.008	76.2535	1752.33
NMSB13_Ol22	61 / 2 .	Microphenocryst	38.8589	0.0147	0.0279	21.3757	0.316	39.6485	0.2573	0.0178	0.0137	0.2031	0.0253	100.759	76.7785	1595.96
NMSB13_Ol22	61 / 3 .	Microphenocryst	38.5585	0.0107	0.035	22.1022	0.3026	39.0146	0.2699	0.0021	0	0.1989	0.028	100.523	75.8835	1562.96
NMSB13_Ol23	62 / 1 .	Microphenocryst	38.0956	0.0213	0.0373	21.5185	0.3033	38.5059	0.2581	0.0026	0.004	0.2336	0.0292	99.0095	76.1323	1835.63
NMSB13_Ol23	62 / 2 .	Microphenocryst	39.1045	0.0168	0.0222	22.224	0.3567	39.3324	0.266	0	0.003	0.2166	0.0163	101.558	75.9314	1702.04
NMSB13_Ol24	63 / 1 .	Microphenocryst	38.8983	0.0249	0.0506	21.7988	0.2996	39.2443	0.2841	0	0.0029	0.1845	0.0148	100.803	76.2421	1449.8
NMSB13_Ol24	63 / 2 .	Microphenocryst	37.6625	0.0281	0.0206	28.1814	0.4531	33.3902	0.322	0.0028	0.0017	0.1075	0.0154	100.185	67.8666	844.735
NMSB18_ol1	47 / 1 .	Phenocryst	39.6699	0.0113	0.0402	16.6239	0.2209	42.661	0.2382	0.0121	0.0058	0.2868	0.0504	99.8204	82.0611	2253.67
NMSB18_ol1	47 / 2 .	Phenocryst	38.3257	0.0143	0.0575	16.8712	0.2256	42.6792	0.2416	0.022	0.0069	0.2816	0.0544	98.7801	81.849	2212.81
NMSB18_ol1	47 / 3 .	Phenocryst	38.1047	0.0168	0.0315	17.7207	0.1869	42.0993	0.2642	0.0062	0	0.2335	0.0374	98.7011	80.8972	1834.84
NMSB18_ol2	48 / 1 .	Phenocryst	38.4753	0.0194	0.0504	16.4492	0.2594	43.13	0.2587	0	0.0196	0.3116	0.0388	99.0124	82.3754	2448.55
NMSB18_ol2	48 / 2 .	Phenocryst	38.5403	0.0177	0.0458	16.7912	0.2633	43.0383	0.2503	0.0051	0.0083	0.2152	0.0308	99.2062	82.0433	1691.04
NMSB18_ol2	48 / 3 .	Phenocryst	38.4748	0.0162	0.0297	16.607	0.2346	42.8684	0.2457	0	0	0.2849	0.0413	98.8026	82.1473	2238.74
NMSB18_ol3	49 / 1 .	Phenocryst	38.5073	0.017	0.0443	17.4203	0.2154	42.9723	0.2448	0	0.0332	0.2017	0.0556	99.712	81.4718	1584.96
NMSB18_ol3	49 / 2 .	Phenocryst	39.0972	0.0136	0.0329	16.8011	0.2403	43.0432	0.2575	0	0.0127	0.261	0.0485	99.8079	82.0363	2050.94
NMSB18_ol3	49 / 3 .	Phenocryst	39.2037	0.014	0.0402	17.1589	0.2618	42.5097	0.257	0.0012	0	0.2609	0.0506	99.7579	81.5366	2050.15
NMSB18_ol4	50 / 1 .	Phenocryst	40.0649	0.014	0.0582	15.1381	0.1992	43.8688	0.2383	0.0225	0	0.3195	0.0525	99.976	83.7812	2510.63
NMSB18_ol4	50 / 2 .	Phenocryst	39.4127	0.0126	0.062	15.6404	0.2078	43.8218	0.2566	0.0089	0.005	0.3386	0.0574	99.8239	83.3178	2660.72
NMSB18_ol4	50 / 3 .	Phenocryst	38.4481	0.0231	0.0517	16.4509	0.229	43.4161	0.2477	0.0051	0	0.2178	0.0486	99.1381	82.4696	1711.47
NMSB18_ol5	51 / 1 .	Phenocryst	39.0748	0.0191	0.0494	16.7018	0.2442	42.8171	0.2418	0	0.0032	0.3009	0.052	99.5043	82.046	2364.47
NMSB18_ol5	51 / 2 .	Phenocryst	38.9607	0.0031	0.0433	16.7227	0.2333	42.5445	0.2554	0.0053	0	0.2804	0.0326	99.0813	81.9332	2203.38
NMSB18_ol5	51 / 3 .	Phenocryst	37.7243	0.0102	0.037	18.5908	0.2442	41.2523	0.2658	0	0	0.2104	0.0437	98.3787	79.8201	1653.32
NMSB18_ol6	52 / 1 .	Phenocryst	40.0782	0.0147	0.2233	16.1918	0.2265	43.2223	0.2418	0	0.0009	0.2876	0.0555	100.543	82.6339	2259.96
NMSB18_ol6	52 / 2 .	Phenocryst	39.2031	0.0107	0.0595	16.36	0.2244	43.3203	0.2409	0.014	0	0.2803	0.0522	99.7655	82.5178	2202.6
NMSB18_ol6	52 / 3 .	Phenocryst	38.5132	0.0178	0.036	16.6115	0.243	42.7216	0.2543	0.0119	0	0.2526	0.0463	98.7082	82.0929	1984.93
NMSB18_ol7	53 / 1 .	Phenocryst	38.3868	0.0188	0.1203	16.7522	0.2065	43.2372	0.2642	0.0047	0	0.2731	0.0563	99.3201	82.1452	2146.02
NMSB18_ol7	53 / 2 .	Phenocryst	38.992	0.0198	0.0566	15.8011	0.2137	43.6036	0.2398	0	0.0183	0.303	0.0529	99.3009	83.1053	2380.97
NMSB18_ol7	53 / 3 .	Phenocryst	39.405	0.0146	0.0458	16.8529	0.244	43.5074	0.2573	0	0	0.3048	0.0763	100.708	82.1487	2395.12
NMSB19_ol1	32 / 1 .	Phenocryst	38.3823	0.0217	0.042	16.6753	0.2277	43.3335	0.2622	0.0132	0.0121	0.2837	0.0456	99.2992	82.2451	2229.31
NMSB19_ol1	32 / 2 .	Phenocryst	38.7111	0.0104	0.0431	16.2522	0.2555	43.5384	0.2588	0.0132	0.0021	0.1981	0.0531	99.3359	82.6849	1556.67
NMSB19_ol1	32 / 3 .	Phenocryst	38.8118	0.0192	0.0497	16.3529	0.219	43.2757	0.2614	0	0.0031	0.2491	0.0562	99.298	82.5092	1957.43
NMSB19_ol2	33 / 1 .	Phenocryst	38.8525	0.016	0.0391	16.57	0.2718	43.6223	0.267	0.0088	0	0.3068	0.03	99.9844	82.4338	2410.83
NMSB19_ol2	33 / 2 .	Phenocryst	38.8136	0.0068	0.0406	16.6726	0.2541	43.8205	0.2576	0.0043	0.0074	0.2824	0.0354	100.195	82.4101	2219.1
NMSB19_ol2	33 / 3 .	Phenocryst	38.8843	0.0213	0.0339	16.5487	0.2149	43.4178	0.2501	0.0097	0.0157	0.324	0.0452	99.7655	82.3844	2545.99
NMSB19_ol3	34 / 1 .	Phenocryst	38.9967	0.012	0.0605	16.6544	0.1978	43.3679	0.2635	0	0.0073	0.2607	0.0345	99.8553	82.275	2048.58
NMSB19_ol3	34 / 2 .	Phenocryst	39.1745	0.0147	0.0402	16.3381	0.2362	43.6552	0.2728	0.0037	0.0024	0.3137	0.0297	100.081	82.6478	2465.05
NMSB19_ol3	34 / 3 .	Phenocryst	38.5824	0.0228	0.0318	17.7116	0.2621	42.7466	0.2623	0	0.0042	0.2665	0.0518	99.9421	81.1397	2094.16
NMSB19_ol4	35 / 1 .	Phenocryst	39.4423	0.0176	0.0535	15.876	0.208	43.9352	0.2608	0.004	0.0021	0.2746	0.0541	100.128	83.1452	2157.81
NMSB19_ol4	35 / 2 .	Phenocryst	39.2588	0.0161	0.082	15.5028	0.2349	43.6116	0.2657	0.0091	0.0006	0.2399	0.0593	99.2808	83.3737	1885.13
NMSB19_ol4	35 / 3 .	Phenocryst	37.9842	0.0259	0.0596	17.613	0.1944	41.9429	0.2666	0	0.0033	0.2147	0.0444	98.3492	80.9339	1687.11
NMSB19_ol5	36 / 1 .	Phenocryst	38.5847	0.0023	0.0575	17.6115	0.2208	42.4733	0.2764	0	0.007	0.3081	0.0365	99.5781	81.1283	2421.05
NMSB19_ol5	36 / 2 .	Phenocryst	38.85	0.0205	0.0494	15.8673	0.254	43.7102	0.2644	0.0122	0.0129	0.2445	0.0545	99.3399	83.0808	1921.28
NMSB19_ol5	36 / 3 .	Phenocryst	38.2402	0.016	0.0425	20.7393	0.281	39.7679	0.2649	0.0069	0.0044	0.222	0.0188	99.6038	77.3657	1744.48
NMSB19_ol6	37 / 1 .	Phenocryst	39.6948	0.001	0.0716	14.0997	0.2132	45.6511	0.2251	0	0.0217	0.3555	0.0719	100.406	85.2321	2793.52
NMSB19_ol6	37 / 2 .	Phenocryst	39.337	0.0073	0.0556	13.9445	0.2231	45.3176	0.2433	0.004	0	0.3882	0.0756	99.5961	85.279	3050.48
NMSB19_ol6	37 / 3 .	Phenocryst	38.6149	0.016	0.0479	17.3369	0.2217	42.8262	0.2515	0.0061	0	0.2797	0.0762	99.6771	81.4929	2197.88
NMSB19_ol7	38 / 1 .	Phenocryst	39.4199	0.0244	0.0432	17.0621	0.2377	43.1547	0.2795	0.008	0.0015	0.2584	0.0485	100.538	81.8464	2030.51
NMSB19_ol7	38 / 2 .	Phenocryst	38.4827	0.021	0.0455	17.1492	0.2564	43.4799	0.288	0.0104	0.0016	0.2094	0.0259	99.9699	81.8823	1645.47
NMSB19_ol7	38 / 3 .	Phenocryst	38.6548	0.0247	0.0428	17.6229	0.2601	42.54	0.2805	0.0045	0	0.2592	0.0442	99.7337	81.1424	2036.79
NMSB19_ol8	39 / 1 .	Phenocryst	39.5617	0.0284	0.0385	16.369	0.2341	43.4863	0.2724	0.0066	0	0.339	0.0143	100.35	82.565	2663.86
NMSB19_ol8	39 / 2 .	Phenocryst	39.3612	0.01	0.0311	16.8348	0.2458	43.0649	0.2673	0	0	0.2554	0.0405	100.111	82.0142	2006.93
NMSB19_ol8	39 / 3 .	Phenocryst	39.1336	0.023	0.0461	18.5337	0.2597	41.8065	0.2696	0.0072	0	0.2042	0.0366	100.32	80.0833	1604.6
NMSB19_ol9	40 / 1 .	Phenocryst	38.8009	0.0249	0.0382	16.909	0.2466	42.9096	0.2734	0.01	0	0.2226	0.0371	99.4723	81.8957	1749.19
NMSB19_ol9	40 / 2 .	Phenocryst	39.0494	0	0.0553	16.6557	0.228	43.4192	0.2675	0.0107	0.0106	0.282	0.0533	100.031	82.2911	2215.96
NMSB19_ol9	40 / 3 .	Phenocryst	39.0265	0.0137	0.0405	16.6997	0.22	42.5908	0.2674	0	0.018	0.285	0.0452	99.2067	81.9697	2239.53
NMSB19_ol10	41 / 1 .	Phenocryst	38.7012	0.0071	0.0407	16.3459	0.2488	43.2277	0.2575	0.007	0.0191	0.2667	0.0456	99.1673	82.4993	2095.73
NMSB19_ol10	41 / 2 .	Phenocryst	38.9192	0.0128	0.0367	16.4575	0.2418	43.2679	0.2559	0.0128	0	0.316	0.0348	99.5555	82.4143	2483.13
NMSB19_ol10	41 / 3 .	Phenocryst	39.0784	0.0141	0.0497	16.8071	0.2744	42.9706	0.2587	0.0007	0.0234	0.2841	0.0493	99.8106	82.0061	2232.46
NMSB19_ol11	42 / 1 .	Phenocryst	39.4296	0.0176	0.0398	16.2999	0.2417	43.4707	0.2467	0.0012	0	0.2818	0.0379	100.067	82.6206	2214.38
NMSB19_ol11	42 / 2 .	Phenocryst	39.058	0.0094	0.0367	16.1348	0.1855	43.1459	0.2464	0	0.0075	0.2961	0.0388	99.1591	82.6591	2326.75
NMSB19_ol11	42 / 3 .	Phenocryst	39.6291	0.0035	0.0375	16.4523	0.2594	42.9109	0.2573	0.0055	0	0.2684	0.0374	99.8612	82.2986	2109.09
NMSB19_ol12	43 / 1 .	Phenocryst	39.3955	0.0253	0.0499	15.9348	0.1979	43.7418	0.2809	0.0065	0.0009	0.2564	0.0488	99.9388	83.0313	2014.79
NMSB19_ol12	43 / 2 .	Phenocryst	38.5929	0.008	0.0259	15.9755	0.2164	44.0064	0.2559	0	0	0.3283	0.042	99.4512	83.0802	2579.78
NMSB19_ol12	43 / 3 .	Phenocryst	38.8158	0.0247	0.0354	17.0713	0.2199	42.6081	0.2659	0.0015	0.0153	0.2541	0.042	99.3541	81.6482	1996.72
NMSB19_ol13	44 / 1 .	Phenocryst	39.0723	0.0189	0.0724	16.3249	0.2062	43.7364	0.2516	0.0053	0	0.2726	0.0409	100.002	82.686	2142.09
NMSB19_ol13	44 / 2 .	Phenocryst	38.9658	0.0258	0.063	16.0713	0.2112	43.844	0.2546	0.001	0.0039	0.3349	0.0392	99.8147	82.9438	2631.64
NMSB19_ol13	44 / 3 .	Phenocryst	39.0491	0.0129	0.0398	17.3689	0.1969	42.7424	0.2504	0	0	0.2478	0.0465	99.9549	81.4354	1947.21
NMSB19_ol14	45 / 1 .	Phenocryst	38.005	0	0.061	16.3138	0.2419	43.0261	0.2668	0	0.0021	0.2412	0.0388	98.1966	82.4602	1895.35
NMSB19_ol14	45 / 2 .	Phenocryst	38.3861	0.0068	0.0552	16.9681	0.2368	43.5994	0.2645	0.0022	0	0.2196	0.038	99.7767	82.0797	1725.62
NMSB19_ol14	45 / 3 .	Phenocryst	39.0497	0.0196	0.039	17.5324	0.2532	42.1774	0.2626	0.0243	0	0.2685	0.0601	99.6869	81.0902	2109.87
NMSB19_ol15	46 / 1 .	Phenocryst	40.0019	0.0153	0.0468	15.1894	0.2148	44.556	0.2603	0.0077	0	0.2934	0.0512	100.637	83.9457	2305.54
NMSB19_ol15	46 / 2 .	Phenocryst	38.9707	0.0055	0.0486	15.1989	0.2393	44.6925	0.247	0.0042	0.0044	0.3198	0.0368	99.7677	83.9785	2512.99
NMSB19_ol15	46 / 3 .	Phenocryst	39.105	0.0225	0.0537	17.064	0.2503	43.0221	0.247	0.0043	0.0072	0.2613	0.0471	100.084	81.799	2053.3
NMSB55_ol1	1 / 1 .	Microphenocryst	37.9379	0.0196	0.0685	20.8556	0.3246	39.2179	0.2283	0.0116	0.0162	0.1735	0.0341	98.8877	77.0221	1363.36
NMSB55_ol1	1 / 2 .	Microphenocryst	37.6966	0.0016	0.0458	21.7513	0.3772	38.7986	0.2166	0.0037	0.0055	0.2456	0.0263	99.1688	76.0743	1929.92
NMSB55_ol1	1 / 3 .	Microphenocryst	37.6477	0.0099	0.0701	22.3868	0.3352	38.3984	0.2317	0.0035	0	0.2404	0.0368	99.3606	75.3542	1889.06
NMSB55_ol2	2 / 1 .	Microphenocryst	38.5342	0.014	0.0529	21.5737	0.2976	38.7583	0.2068	0.0013	0	0.2498	0.0247	99.7133	76.2044	1962.93
NMSB55_ol2	2 / 2 .	Microphenocryst	37.3958	0.0129	0.8874	21.6375	0.3473	35.2796	0.3769	0.0209	0.0541	0.1845	0.0358	96.2328	74.4011	1449.8
NMSB55_ol2	2 / 3 .	Microphenocryst	37.4317	0.0476	0.9298	23.9255	0.3527	33.1813	0.3971	0.0171	0.0897	0.0905	0.0253	96.4883	71.1994	711.149
NMSB55_ol3	3 / 1 .	Microphenocryst	37.415	0.0022	0.0544	23.6453	0.3925	37.2912	0.2007	0	0	0.2286	0.0141	99.244	73.7621	1796.34
NMSB55_ol3	3 / 2 .	Microphenocryst	37.5809	0.0291	0.0399	27.2831	0.4699	34.3364	0.2056	0.0063	0	0.158	0.016	100.125	69.168	1241.56
NMSB55_ol3	3 / 3 .	Microphenocryst	35.9817	0.0297	0.0506	28.7389	0.5527	33.2706	0.2229	0.0054	0	0.1454	0.0155	99.0134	67.359	1142.55
NMSB55_ol4	4 / 1 .	Groundmass	36.6715	0.022	0.0442	25.3571	0.4371	35.9672	0.2186	0.0076	0	0.1932	0.0105	98.9289	71.6587	1518.17
NMSB55_ol4	4 / 2 .	Groundmass	37.0476	0.0384	0.0402	26.6459	0.4527	34.7325	0.175	0	0.0078	0.1068	0.0053	99.2523	69.9115	839.234
NMSB55_ol4	4 / 3 .	Groundmass	36.2686	0.0224	0.0536	28.3447	0.4717	33.8903	0.2078	0.0096	0	0.1066	0.0142	99.3895	68.0644	837.663
NMSB55_ol5	5 / 1 .	Groundmass	36.4934	0.0181	0.0364	27.226	0.4872	34.2946	0.2208	0.0063	0	0.0728	0.0083	98.864	69.1867	572.062
NMSB55_ol5	5 / 2 .	Groundmass	36.0838	0.0264	0.2012	26.6543	0.4319	33.7214	0.2626	0.0036	0.0009	0.0841	0.0169	97.4871	69.2797	660.858
NMSB55_ol5	5 / 3 .	Groundmass	36.4556	0.0214	0.0318	28.0739	0.5303	33.5367	0.244	0.0058	0.0084	0.0338	0.0121	98.9538	68.0451	265.6
NMSB55_ol6	6 / 1 .	Microphenocryst	38.2456	0.0105	0.0283	22.7453	0.3915	38.3078	0.2239	0	0	0.233	0.0087	100.195	75.0137	1830.91
NMSB55_ol6	6 / 2 .	Microphenocryst	37.7761	0.0129	0.0604	23.4452	0.4243	37.5214	0.232	0.011	0.0004	0.1628	0.0075	99.6538	74.0447	1279.28
NMSB55_ol6	6 / 3 .	Microphenocryst	38.875	0.0413	2.1316	26.238	0.3722	25.3356	0.759	0.0228	0.1052	0.083	0.0184	93.9821	63.2521	652.214
NMSB55_ol7	7 / 1 .	Microphenocryst	36.7563	0.0079	0.0329	25.8467	0.4709	35.5434	0.2113	0.0161	0.0066	0.1654	0.0169	99.0744	71.0254	1299.71
NMSB55_ol7	7 / 2 .	Microphenocryst	36.2761	0.0187	0.0343	27.3934	0.4519	34.1315	0.2318	0.0051	0	0.1477	0.0092	98.6995	68.9539	1160.63
NMSB55_ol7	7 / 3 .	Microphenocryst	36.3564	0.1054	0.0229	28.0763	0.5261	33.1447	0.1825	0.0107	0.002	0.1055	0.0031	98.5356	67.7871	829.019
NMSB55_ol8	8 / 1 .	Microphenocryst	38.0826	0.0265	0.0486	19.7782	0.267	40.8785	0.2169	0.0031	0	0.2161	0.0182	99.5358	78.6519	1698.11
NMSB55_ol8	8 / 2 .	Microphenocryst	37.9421	0.0163	0.0619	19.8971	0.3341	40.2991	0.2206	0.0134	0	0.2254	0.0257	99.0357	78.3096	1771.19
NMSB55_ol8	8 / 3 .	Microphenocryst	37.9387	0.0237	0.118	21.9394	0.3672	37.6976	0.221	0	0.0318	0.2249	0.0202	98.5825	75.387	1767.26
NMSB61_ol1	9 / 1 .	Micro/Incl (in plag)	44.3392	0	5.5129	19.849	0.0788	15.6192	2.3029	0.0321	0.186	0.0175	0	87.9377	58.38	137.515
NMSB61_ol1	9 / 2 .	Micro/Incl (in plag)	44.6828	0.0138	5.4194	20.5248	0.0669	15.1398	2.2236	0.0618	0.3549	0.0124	0.0043	88.5044	56.8011	97.4392
NMSB61_ol2	10 / 1 .	Microphenocryst	46.9889	0.0047	4.7218	18.4109	0.1246	16.8382	1.8939	0.0243	0.1282	0.0393	0.006	89.1808	61.9813	308.819
NMSB61_ol2	10 / 2 .	Microphenocryst	46.8077	0	4.7818	18.6299	0.091	17.0608	1.9416	0.0147	0.0956	0.0093	0	89.4324	62.0121	73.0794
NMSB61_ol2	10 / 3 .	Microphenocryst	44.68	0.0166	4.686	20.4707	0.0974	15.5038	2.0069	0.018	0.0996	0.0206	0	87.5995	57.4476	161.875
NMSB61_ol3	11 / 1 .	Microphenocryst	38.8446	0.0259	0.0551	20.0531	0.3232	39.9764	0.2283	0.0097	0.0027	0.2802	0.0119	99.8112	78.0392	2201.81
NMSB61_ol3	11 / 2 .	Microphenocryst	38.0736	0.0163	0.0427	20.0389	0.2797	39.9824	0.221	0.0092	0.0031	0.2378	0.0241	98.9286	78.0539	1868.63
NMSB61_ol3	11 / 3 .	Microphenocryst	37.4145	0.0233	0.0404	23.2378	0.2946	37.3515	0.2377	0.016	0	0.2246	0	98.8404	74.1281	1764.91
NMSB61_ol4	12 / 1 .	Microphenocryst	38.5467	0.0192	0.0605	19.9553	0.2838	40.062	0.22	0.0213	0.0007	0.2006	0.0138	99.3839	78.1594	1576.31
NMSB61_ol4	12 / 2 .	Microphenocryst	38.0282	0.0251	0.0446	20.1301	0.2855	40.2031	0.2217	0.0033	0.0151	0.2708	0.0232	99.2507	78.0704	2127.95
NMSB61_ol4	12 / 3 .	Microphenocryst	37.6469	0.0117	0.0305	20.6194	0.2981	39.4684	0.231	0.0032	0.0071	0.1922	0.0126	98.5211	77.3348	1510.31
NMSB61_ol5	13 / 1 .	Microphenocryst	37.874	0.0159	0.0509	19.9319	0.2877	40.001	0.2363	0.0171	0	0.2037	0.0077	98.6262	78.1534	1600.67
NMSB61_ol5	13 / 2 .	Microphenocryst	37.5996	0.025	0.0405	19.7821	0.3153	40.0824	0.2223	0.0018	0.0012	0.2057	0.0166	98.2928	78.3165	1616.39
NMSB61_ol5	13 / 3 .	Microphenocryst	37.8074	0.0239	0.0395	19.9079	0.2827	40.0314	0.2181	0	0.0028	0.2213	0.0328	98.5677	78.1869	1738.98
NMSB61_ol6	14 / 1 .	Microphenocryst	38.4144	0.0188	0.03	20.1281	0.2817	40.2763	0.2199	0	0.0009	0.1964	0.029	99.5955	78.1032	1543.31
NMSB61_ol6	14 / 2 .	Microphenocryst	38.3319	0.0112	0.0363	20.1447	0.2985	40.064	0.2314	0.0041	0	0.2026	0.0108	99.3356	77.9986	1592.03
NMSB61_ol6	14 / 3 .	Microphenocryst	38.0895	0.0274	0.0612	20.3599	0.3367	39.3534	0.2438	0.0108	0	0.2852	0.0158	98.7837	77.5052	2241.1
NMSB61_ol7	15 / 1 .	Microphenocryst	48.4568	0	4.09	16.4532	0.1689	17.7027	1.5379	0.0477	0.2442	0.0632	0	88.7646	65.7291	496.626
NMSB61_ol7	15 / 2 .	Microphenocryst	46.9394	0	4.6394	17.974	0.1802	17.1311	1.9057	0.0215	0.1722	0.0155	0.0017	88.9807	62.9487	121.799
NMSB61_ol7	15 / 3 .	Microphenocryst	44.4674	0.0098	5.0169	20.0517	0.1211	15.3105	2.2053	0.0201	0.1295	0.0227	0.0081	87.3631	57.6463	178.377
NMSB61_ol8	16 / 1 .	Micro/Incl (in plag)	46.7984	0	5.8594	20.1647	0.0434	15.4204	2.2522	0.0114	0.2368	0.0309	0	90.8177	57.6837	242.812
NMSB61_ol9	17 / 1 .	Micro/Incl (in plag)	45.5814	0.0035	5.3571	20.1394	0.1212	15.5565	2.3629	0.0285	0.1687	0.0031	0	89.3224	57.9287	24.3598
NMSB61_ol10	18 / 1 .	Micro/Incl (in plag)	43.9329	0.0062	5.3984	21.988	0.0658	14.7954	2.4904	0.0182	0.14	0	0	88.8352	54.5342	0
NMSB61_ol11	19 / 1 .	Micro/Incl (in plag)	37.6985	0.028	0.0387	22.4605	0.3119	37.8518	0.2261	0.0026	0.0013	0.1444	0.0122	98.7758	75.0254	1134.7
NMSB64_ol1	20 / 1 .	Microphenocryst	37.7857	0.0462	17.6044	12.9034	0.1086	8.1555	4.8229	0.2326	1.8315	0.0258	0	83.5166	52.9777	202.736
NMSB64_ol2	21 / 1 .	Microphenocryst	35.9994	0.0211	0.0293	30.9611	0.5177	31.312	0.3173	0.0087	0	0.093	0.0001	99.2596	64.3208	730.794
NMSB64_ol2	21 / 2 .	Microphenocryst	36.3369	0.0213	0.0418	30.0758	0.4527	31.9608	0.3156	0.0202	0	0.1626	0.0131	99.4009	65.449	1277.71
NMSB64_ol2	21 / 3 .	Microphenocryst	36.4516	0.0391	0.6086	27.7544	0.4389	32.2963	0.3931	0.0294	0.0102	0.0881	0.0121	98.1219	67.4719	692.29
NMSB64_ol3	22 / 1 .	Microphenocryst	35.1671	0.0266	0.0238	33.0223	0.4646	30.3595	0.3513	0.0203	0.0077	0.1071	0.0079	99.5582	62.1042	841.592
NMSB64_ol3	22 / 2 .	Microphenocryst	35.6853	0.0346	0.0178	33.0221	0.5409	29.868	0.3592	0.0061	0	0.0724	0	99.6062	61.7194	568.919
NMSB64_ol4	23 / 1 .	Microphenocryst	36.6158	0.0413	0.8004	28.7649	0.4709	26.1244	0.5408	0.0379	0.0167	0.0767	0	93.4896	61.8163	602.709
NMSB64_ol4	23 / 2 .	Microphenocryst	35.3363	0.0254	0.0266	34.0338	0.5963	28.7772	0.3542	0	0	0.0835	0	99.2334	60.1154	656.143
NMSB64_ol5	24 / 1 .	Microphenocryst	35.9805	0.0464	0.0173	29.917	0.4732	32.2228	0.3356	0.0008	0	0.1115	0	99.1051	65.7527	876.167
NMSB64_ol5	24 / 2 .	Microphenocryst	36.1843	0.0246	0.0324	32.3927	0.5019	30.1161	0.3347	0	0.0031	0.1704	0.006	99.766	62.3674	1339
NMSB64_ol6	25 / 1 .	Microphenocryst	35.7376	0.0153	0.0436	29.2245	0.4357	31.9969	0.3263	0.0051	0	0.1146	0.0101	97.9097	66.1207	900.527
NMSB64_ol6	25 / 2 .	Microphenocryst	35.7864	0.0115	0.0323	30.3366	0.4815	31.9434	0.2952	0.0004	0.0058	0.089	0.0055	98.9874	65.2412	699.362
NMSB64_ol6	25 / 3 .	Microphenocryst	36.0243	0.0248	0.0173	31.2804	0.5378	31.3965	0.3174	0	0.0054	0.0868	0.0092	99.7	64.147	682.074
NMSB68_ol1	26 / 1 .	Micro/Incl (in plag)	36.9665	0.0398	0.0374	25.9763	0.4094	35.3097	0.2815	0	0.0055	0.1438	0	99.17	70.7861	1129.98
NMSB68_ol1	26 / 2 .	Micro/Incl (in plag)	36.9525	0.0308	0.0316	25.4993	0.3814	35.3355	0.259	0.0084	0.0039	0.1346	0.0117	98.6486	71.1829	1057.69
NMSB68_ol1	26 / 3 .	Micro/Incl (in plag)	36.587	0.0236	0.0222	25.4236	0.3336	35.8682	0.2727	0	0	0.0853	0.0043	98.6206	71.5494	670.287
NMSB68_ol2	27 / 1 .	Micro/Incl (in plag)	35.3472	0.037	0.0153	33.0365	0.6261	29.0503	0.3	0	0.0004	0.0632	0.0065	98.4825	61.0511	496.626
NMSB68_ol3	28 / 1 .	Micro/Incl (in plag)	37.219	0.0353	0.0362	24.7267	0.381	35.6784	0.3116	0	0	0.109	0.0213	98.5186	72.005	856.522
NMSB68_ol4	29 / 1 .	Microphenocryst	42.0449	0.0098	5.3618	25.5056	0.1985	12.4037	1.8565	0.0272	0.1351	0.0317	0	87.5748	46.4346	249.099
NMSB68_ol4	29 / 2 .	Microphenocryst	40.7827	0.015	5.9666	25.315	0.1752	12.4686	2.2576	0.0375	0.0876	0	0	87.1058	46.7512	0
NMSB68_ol4	29 / 3 .	Microphenocryst	40.1066	0.0351	6.0741	26.9642	0.1455	12.3403	2.037	0.0301	0.1849	0	0.0023	87.9202	44.9277	0
NMSB68_ol5	30 / 1 .	Groundmass	33.6468	0.0881	0.0205	42.7254	0.7981	21.6858	0.2568	0	0	0.0131	0	99.2346	47.4998	102.94
NMSB68_ol6	31 / 1 .	Micro/Incl (in plag)	37.1178	0.0192	0.1277	25.2451	0.3875	35.2257	0.2928	0	0.0043	0.0288	0.0023	98.4512	71.3244	226.31
NMSB68_ol7	32 / 1 .	Micro/Incl (in plag)	36.8129	0.0388	0.034	27.4523	0.3987	34.4779	0.2699	0	0	0.0308	0.0257	99.541	69.1238	242.026
NMSB68_ol8	33 / 1 .	Microphenocryst	33.8949	0.0355	0.0378	37.7181	0.787	25.2205	0.3005	0.0065	0.0017	0.0253	0	98.028	54.3778	198.807
NMSB68_ol9	34 / 1 .	Phenocryst	44.7072	0	5.8177	21.0948	0.2075	14.6026	2.2019	0.0203	0.1322	0.0134	0.0025	88.8001	55.2362	105.297
NMSB68_ol9	34 / 2 .	Phenocryst	42.9508	0.01	5.6516	23.5442	0.1995	13.806	2.2145	0.0054	0.1047	0	0	88.4867	51.1066	0
NMSB68_ol9	34 / 3 .	Phenocryst	41.9196	0.0199	5.0265	25.3453	0.1597	13.2349	2.1821	0.0358	0.1438	0.0389	0	88.1066	48.2085	305.676
Notes
On any given grain, point 1 = core analysis, 2 = midpoint analysis, 3 = rim analysis. Where only 2 points are analyzed, 1 = core and 2 = rim. Where more than 3 points are analyzed, 1 = core, final point = rim, and all others are midpoints increasingly farther from the core.
Bolded Fo (forsterite) content indicates a core analysis.
Red text indicates an erroneous analysis (not olivine or off grain). These data were not used for any plots, calculations or models.
Orange text indicates low or high total. These data were not used for any plots, calculations or models.

## Sheet: Clinopyroxene
Sample_Grain	Grain # / Point	Grain Type	SiO2 wt.%	TiO2 wt.%	Al2O3 wt.%	FeO wt.%	MnO wt.%	MgO wt.%	CaO wt.%	Na2O wt.%	K2O wt.%	Cr2O3 wt.%	Total	Mg#	Cr ppm
MF9466_Cpx1	1 / 1 .	Microphenocryst	50.5488	1.6248	4.0807	8.9717	0.2043	15.5327	18.1567	0.2958	0.0046	0.581	100.001	75.527	3975.2
MF9466_Cpx1	1 / 2 .	Microphenocryst	51.4529	1.4127	2.8305	11.4519	0.2912	15.1956	17.5312	0.275	0	0.088	100.529	70.2848	602.096
MF9466_Cpx2	2 / 1 .	Microphenocryst	50.7975	1.2814	3.5114	9.1836	0.1841	15.4367	18.5964	0.272	0.0076	0.3038	99.5745	74.9768	2078.6
MF9466_Cpx2	2 / 2 .	Microphenocryst	50.5242	1.4766	2.9098	11.4678	0.265	15.0189	17.6604	0.2652	0	0.0532	99.6411	70.0108	363.994
MF9466_Cpx3	3 / 1 .	Microphenocryst	51.8179	1.1056	1.4004	12.9999	0.2825	15.5396	16.3196	0.2144	0	0.0403	99.7201	68.0593	275.733
MF9466_Cpx3	3 / 2 .	Microphenocryst	49.878	1.5426	2.3266	15.5962	0.3101	13.4956	16.5593	0.3117	0	0.013	100.033	60.6681	88.946
MF9466_Cpx4	4 / 1 .	Microphenocryst	51.1917	1.5531	2.5572	13.3194	0.2753	14.7216	17.2844	0.2901	0	0.0284	101.221	66.3324	194.313
MF9466_Cpx4	4 / 2 .	Microphenocryst	51.3748	1.5271	3.093	11.2971	0.1986	14.877	17.4958	0.2815	0	0.1132	100.258	70.1262	774.514
MF9466_Cpx5	5 / 1 .	Microphenocryst	51.5451	1.4492	4.0074	9.224	0.2205	16.0635	18.1755	0.2866	0	0.2683	101.24	75.6353	1835.71
MF9466_Cpx5	5 / 2 .	Microphenocryst	53.4364	0.7566	1.4897	11.2748	0.2502	18.1078	15.441	0.2022	0	0.1945	101.153	74.1124	1330.77
MF9466_Cpx5	5 / 3 .	Microphenocryst	52.1122	1.0957	1.2643	15.4816	0.3434	15.847	14.7592	0.2157	0.002	0.0173	101.138	64.5971	118.367
MF9466_Cpx6	6 / 1 .	Microphenocryst	50.7622	1.3433	4.1786	8.2868	0.1478	15.9249	17.7945	0.2973	0	1.0049	99.7403	77.404	6875.53
MF9466_Cpx6	6 / 2 .	Microphenocryst	47.9937	1.7159	4.8806	15.5328	0.3359	13.7453	14.7186	0.3205	0	0.0034	99.2467	61.2015	23.2628
MF9466_Cpx7	7 / 1 .	Microphenocryst	50.3583	1.7133	3.9677	8.3672	0.1832	15.3033	19.3264	0.2702	0	0.641	100.13	76.527	4385.72
MF9466_Cpx7	7 / 2 .	Microphenocryst	50.5355	1.5564	3.58	10.338	0.1777	15.801	17.5268	0.2592	0	0.2551	100.029	73.1509	1745.39
MF9467_Cpx1	8 / 1 .	Microphenocryst	53.8177	0.769	2.0002	9.5579	0.2752	18.0179	16.906	0.2508	0.0043	0.527	102.126	77.066	3605.73
MF9467_Cpx1	8 / 2 .	Microphenocryst	52.946	0.8682	2.2171	10.4211	0.2495	17.2836	17.0292	0.2564	0.0086	0.2708	101.55	74.7245	1852.81
MF9467_Cpx2	9 / 1 .	Microphenocryst	51.0457	1.0755	3.126	9.2491	0.2164	15.7263	18.0514	0.3134	0.0051	0.3924	99.2013	75.1916	2684.8
MF9467_Cpx2	9 / 2 .	Microphenocryst	52.7038	0.8419	2.3496	8.9048	0.1863	17.1023	17.8515	0.26	0.0009	0.5514	100.753	77.3936	3772.68
MF9467_Cpx2	9 / 3 .	Microphenocryst	52.3496	0.9958	1.634	12.7086	0.2656	16.2981	16.368	0.2561	0.0004	0.0293	100.906	69.5681	200.471
MF9467_Cpx3	10 / 1 .	Microphenocryst	52.3791	1.0285	2.1312	10.4806	0.2716	16.2668	17.5964	0.2847	0.0009	0.2509	100.691	73.4514	1716.66
MF9467_Cpx3	10 / 2 .	Microphenocryst	51.2661	1.3337	3.508	9.6002	0.1789	16.06	18.2619	0.2832	0.0027	0.6009	101.096	74.887	4111.36
MF9467_Cpx3	10 / 3 .	Microphenocryst	50.2523	1.4654	3.8552	9.8744	0.1959	16.0719	17.7071	0.3168	0.0058	0.5935	100.338	74.3678	4060.73
MF9467_Cpx4	11 / 1 .	Microphenocryst	54.5425	0.8745	2.0359	10.882	0.2897	16.4161	17.009	0.2227	0	0.1218	102.394	72.893	833.356
MF9467_Cpx4	11 / 2 .	Microphenocryst	50.6425	1.5067	3.2335	11.3684	0.2378	15.5319	17.2427	0.2976	0.001	0.1162	100.178	70.8912	795.04
MF9467_Cpx4	11 / 3 .	Microphenocryst	50.3925	1.6555	2.6683	14.6971	0.3387	14.2439	16.5879	0.3418	0.015	0.0222	100.963	63.3375	151.892
MF9467_Cpx5	12 / 1 .	Microphenocryst	52.1677	1.0253	2.8815	9.0471	0.2216	16.6625	17.6453	0.2833	0	0.5722	100.506	76.652	3914.99
MF9467_Cpx5	12 / 2 .	Microphenocryst	51.6188	1.4648	3.4939	9.6114	0.1799	15.504	18.4465	0.2775	0	0.3966	100.993	74.1963	2713.54
MF9467_Cpx5	12 / 3 .	Microphenocryst	51.6976	1.1023	3.3742	8.9797	0.1113	16.2556	18.1298	0.2816	0	0.6907	100.623	76.3419	4725.77
MF9467_Cpx6	13 / 1 .	Microphenocryst	53.5744	0.8907	1.655	11.2066	0.226	17.0642	16.7862	0.2444	0	0.1217	101.769	73.0769	832.671
MF9467_Cpx6	13 / 2 .	Microphenocryst	53.6124	0.7964	1.8708	9.4558	0.1508	17.3341	17.8078	0.2422	0	0.4426	101.713	76.5683	3028.27
MF9467_Cpx7	14 / 1 .	Microphenocryst	52.9585	0.7727	2.1201	8.6117	0.1996	17.087	18.3121	0.2586	0	0.529	100.849	77.9584	3619.42
MF9467_Cpx7	14 / 2 .	Microphenocryst	53.2753	0.8151	1.8544	9.5519	0.1963	17.5526	16.9201	0.2111	0.0064	0.3672	100.75	76.6116	2512.38
MF9467_Cpx7	14 / 3 .	Microphenocryst	53.2249	0.9044	1.6607	10.5015	0.2101	16.6838	17.1443	0.2438	0.0145	0.1205	100.709	73.9036	824.461
MF9468_Cpx1	11 / 1 .	Groundmass	47.8267	0.9035	5.306	10.0399	0.0216	13.322	16.7911	0.5045	0.0269	0.3745	95.1167	70.2848	2562.33
MF9468_Cpx1	11 / 2 .	Groundmass	51.8557	0.8735	2.8623	9.9461	0.0384	16.6068	16.9416	0.2636	0	0.4608	99.8489	74.8509	3152.79
MF9468_Cpx2	12 / 1 .	Groundmass	51.8123	1.0867	2.9949	12.2507	0.028	15.6112	16.6325	0.2831	0	0.2084	100.908	69.4332	1425.87
MF9468_Cpx2	12 / 2 .	Groundmass	50.9367	1.0574	2.3892	12.2333	0.0615	15.7901	17.1062	0.3033	0.0071	0.0636	99.9486	69.7045	435.151
MF9468_Cpx3	13 / 1 .	Groundmass	52.1477	0.8662	1.3636	17.0078	0.0566	14.1169	15.3022	0.2867	0.01	0.0106	101.168	59.6703	72.5252
MF9468_Cpx3	13 / 2 .	Groundmass	49.5061	1.0133	4.1481	11.5447	0.0324	16.0737	17.1115	0.3086	0.0362	0.1674	99.942	71.2796	1145.35
MF9468_Cpx4	14 / 1 .	Groundmass	51.6758	1.0389	3.2022	10.4964	0.0835	15.8331	17.6457	0.2565	0.0026	0.3147	100.55	72.8913	2153.18
MF9468_Cpx4	14 / 2 .	Groundmass	43.4024	3.1094	3.5026	12.2932	0.0676	6.7619	16.8452	0.6063	1.3231	0.0166	87.9282	49.5076	113.577
MF9469_Cpx1	7 / 1 .	Microphenocryst	51.5602	1.1712	3.207	11.4915	0.0857	15.8199	17.1725	0.2675	0.0184	0.042	100.836	71.0478	287.364
MF9469_Cpx1	7 / 2 .	Microphenocryst	50.9615	1.259	2.3182	13.5502	0	15.6166	16.1531	0.2828	0.0095	0.0301	100.181	67.2603	205.944
MF9469_Cpx1	7 / 3 .	Microphenocryst	50.757	0.3619	20.9247	1.2602	0.0039	0.0694	6.7818	5.3438	0.8059	0	86.3085	8.93911	0
MF9469_Cpx2	8 / 1 .	Groundmass	51.7869	1.0479	2.1908	13.1336	0.0903	15.0584	16.3898	0.3023	0.0028	0.0177	100.02	67.1463	121.103
MF9469_Cpx2	8 / 2 .	Groundmass	57.9029	0.3224	17.4293	4.3986	0.0503	3.3926	7.881	5.5863	0.877	0.0203	97.8608	57.8924	138.893
MF9469_Cpx3	9 / 1 .	Groundmass	52.8472	0.871	2.8845	8.5828	0.0148	16.5767	18.706	0.2502	0	0.4404	101.174	77.4917	3013.22
MF9469_Cpx3	9 / 2 .	Groundmass	51.8938	0.9532	3.7094	7.8816	0.0137	16.4752	18.217	0.2745	0	1.2145	100.633	78.8411	8309.61
MF9469_Cpx4	10 / 1 .	Groundmass	52.0816	0.9565	2.8076	9.7091	0.0569	16.5301	17.6735	0.2768	0.0055	0.3576	100.455	75.216	2446.7
MF9469_Cpx4	10 / 2 .	Groundmass	51.5812	1.0751	2.6617	10.2643	0.0397	16.3084	17.5693	0.3158	0	0.2504	100.066	73.9053	1713.24
MF9472_Cpx1	15 / 1 .	Groundmass	52.3697	0.8833	3.135	8.3878	0.1722	16.7548	18.1238	0.2866	0.0125	0.8919	101.018	78.0735	6102.38
MF9472_Cpx2	16 / 1 .	Groundmass	52.5382	0.7762	2.8275	8.746	0.1944	17.3014	17.3537	0.256	0	0.7588	100.752	77.9067	5191.71
MF9472_Cpx3	17 / 1 .	Groundmass	46.3386	1.1722	4.8276	12.2371	0.2774	15.4628	15.7515	0.3665	0.0373	0.0189	96.49	69.2538	129.314
MF9472_Cpx4	18 / 1 .	Groundmass	51.8818	1.0204	2.4507	10.4599	0.2412	15.8194	17.9054	0.3288	0	0.4282	100.536	72.943	2929.74
MF9472_Cpx5	19 / 1 .	Groundmass	51.9101	0.8548	3.0601	7.8644	0.1388	16.764	18.3261	0.286	0.0205	0.9219	100.147	79.1656	6307.64
MF9472_Cpx6	20 / 1 .	Groundmass	52.5696	1.054	1.5661	12.3737	0.2869	15.9862	16.7266	0.3112	0.0076	0.0279	100.91	69.7242	190.892
JS19_Cpx1	21 / 1 .	Groundmass	46.4349	4.6928	3.1158	25.3029	0.3191	11.7654	9.1207	0.3772	0.6457	0.0261	101.8	45.321	178.576
JS22_Cpx1	1 / 1 .	Phenocryst	49.3071	1.4453	4.014	10.1934	0.0088	14.8228	18.242	0.3611	0	0.3367	98.7312	72.1612	2303.7
JS22_Cpx1	1 / 2 .	Phenocryst	48.8553	1.4705	4.4091	10.7451	0.0196	14.6892	17.5484	0.3583	0.0061	0.3461	98.4475	70.9036	2368.02
JS22_Cpx1	1 / 3 .	Phenocryst	51.1503	1.0047	1.4528	14.3447	0	14.9473	16.0557	0.2561	0	0	99.2114	65.0036	0
JS22_Cpx2	2 / 1 .	Microphenocryst	50.3892	1.4318	4.2404	9.7947	0.0089	14.8879	18.3607	0.395	0	0.5516	100.06	73.042	3774.05
JS22_Cpx2	2 / 2 .	Microphenocryst	50.3465	1.3456	3.0038	12.0224	0.1012	14.3231	17.9941	0.3803	0.014	0.0421	99.5731	67.9864	288.048
JS22_Cpx3	3 / 1 .	Microphenocryst	49.9575	1.3584	3.7039	10.0332	0.0514	14.8878	18.2904	0.3463	0	0.2488	98.8776	72.5655	1702.29
JS22_Cpx3	3 / 2 .	Microphenocryst	52.2883	0.836	1.7438	10.7026	0.0555	16.2161	17.4554	0.2814	0.0177	0.1294	99.7263	72.9791	885.355
JS22_Cpx3	3 / 3 .	Microphenocryst	50.2999	1.5162	3.2881	12.4173	0.0433	14.1986	17.7918	0.378	0	0.0583	99.9915	67.0865	398.889
JS22_Cpx4	4 / 1 .	Microphenocryst	49.8423	1.6067	3.818	12.0054	0	14.6108	17.1759	0.3398	0.0221	0.1845	99.6055	68.4483	1262.35
JS22_Cpx4	4 / 2 .	Microphenocryst	50.4245	1.4457	3.25	11.9913	0	14.2266	17.8961	0.3983	0	0.0635	99.696	67.8956	434.467
JS22_Cpx4	4 / 3 .	Microphenocryst	49.982	1.4733	3.1729	12.5695	0.0146	14.1698	17.6692	0.3785	0.0054	0.0543	99.4894	66.7719	371.521
JS22_Cpx5	5 / 1 .	Microphenocryst	51.8707	1.4424	7.0828	10.5943	0.0443	12.9232	14.3412	1.1676	0.3262	0.2338	100.026	68.498	1599.66
JS22_Cpx5	5 / 2 .	Microphenocryst	48.4116	2.0442	3.6263	14.5599	0.0594	13.3877	16.6262	0.427	0	0.0317	99.1738	62.1075	216.891
JS22_Cpx5	5 / 3 .	Microphenocryst	48.6867	2.148	3.537	14.9897	0	13.1753	16.5484	0.4489	0.0057	0.0149	99.5547	61.0408	101.946
JS22_Cpx6	6 / 1 .	Phenocryst	50.4451	1.3736	3.7467	10.692	0	14.9034	18.2318	0.4167	0.0128	0.1898	100.012	71.3029	1298.61
JS22_Cpx6	6 / 2 .	Phenocryst	50.3378	1.3945	3.7162	10.7588	0.0152	14.9062	18.3161	0.3754	0.011	0.2068	100.038	71.1791	1414.93
JS22_Cpx6	6 / 3 .	Phenocryst	49.9568	1.6251	3.2594	13.3692	0.0224	13.7939	17.5461	0.4516	0.0132	0.0295	100.067	64.7786	201.839
JS23_cpx1	1 / 1 .	Phenocryst	49.9649	2.2275	3.802	13.3731	0.2598	13.4333	17.4986	0.4017	0	0.0019	100.963	64.1651	12.9998
JS23_cpx1	1 / 2 .	Phenocryst	50.3596	2.2041	3.6489	12.7186	0.2047	13.2955	18.2335	0.4042	0.0113	0.0478	101.128	65.0766	327.048
JS23_cpx1	1 / 3 .	Phenocryst	55.7389	0.4995	22.9924	3.1003	0.0543	2.9156	10.6706	4.4671	0.272	0.0019	100.713	62.6358	12.9998
JS23_cpx2	2 / 1 .	Micropheno	53.3953	0.9054	5.437	11.9927	0.2559	13.371	15.7102	1.3762	0.0584	0.0194	102.522	66.5263	132.735
JS23_cpx2	2 / 2 .	Micropheno	52.3289	1.1501	1.6816	13.099	0.2907	15.0389	16.9945	0.2901	0	0.0254	100.899	67.1759	173.787
JS23_cpx2	2 / 3 .	Micropheno	55.4727	0.8641	11.0511	9.3432	0.1931	6.9684	13.7566	3.6151	0.2939	0.0071	101.565	57.0719	48.5782
JS23_cpx3	3 / 1 .	Phenocryst	49.9668	2.2731	4.1226	12.4943	0.219	13.3148	18.0589	0.4331	0	0.099	100.982	65.5126	677.358
JS23_cpx3	3 / 2 .	Phenocryst	49.554	2.2348	3.9522	12.5059	0.2109	13.0567	17.9674	0.3908	0.0046	0.1128	99.9902	65.0479	771.778
JS23_cpx3	3 / 3 .	Phenocryst	48.7218	2.081	3.5988	12.8427	0.2027	12.7742	17.5618	0.3602	0.0017	0.0222	98.1671	63.9386	151.892
JS23_cpx4	4 / 1 .	Phenocryst	49.5388	2.2955	4.2673	11.628	0.1851	12.8852	18.7463	0.4291	0.0136	0.0859	100.075	66.3897	587.728
JS23_cpx4	4 / 2 .	Phenocryst	49.1464	2.5062	4.5494	12.1569	0.201	12.9877	18.8831	0.4235	0.006	0.1199	100.98	65.5691	820.356
JS23_cpx4	4 / 3 .	Phenocryst	50.3587	1.9175	3.3276	12.1623	0.211	13.3632	18.6835	0.3988	0.0014	0.0373	100.461	66.1998	255.207
JS23_cpx5	5 / 1 .	Microphenocryst	49.421	2.3441	4.15	12.3775	0.1528	13.273	18.3617	0.4284	0.0064	0.0962	100.611	65.6537	658.2
JS23_cpx5	5 / 2 .	Microphenocryst	49.2349	2.4114	4.3491	12.4412	0.1498	12.9575	18.5355	0.4185	0	0.1312	100.629	64.9925	897.67
JS23_cpx5	5 / 3 .	Microphenocryst	48.9041	2.4237	4.4122	12.0558	0.1569	13.1501	18.7608	0.4341	0.0031	0.1167	100.418	66.0367	798.461
JS23_cpx6	6 / 1 .	Microphenocryst	48.3865	2.6883	5.002	12.7136	0.2275	13.0386	17.8315	0.4378	0	0.1179	100.444	64.6408	806.672
JS23_cpx6	6 / 2 .	Microphenocryst	49.307	2.1899	5.0584	11.7231	0.1695	13.1029	18.3702	0.444	0	0.0866	100.452	66.5815	592.517
JS23_cpx6	6 / 3 .	Microphenocryst	50.5436	1.853	3.4635	12.0328	0.2078	13.6556	18.5234	0.39	0	0.031	100.701	66.9198	212.102
JS26_cpx1	7 / 1 .	Microphenocryst	53.1544	0.9213	2.1822	9.7783	0.1991	16.51	17.9015	0.283	0	0.2848	101.215	75.0606	1948.6
JS26_cpx1	7 / 2 .	Microphenocryst	50.7417	1.6882	3.9344	10.9763	0.1906	14.7378	18.1037	0.4003	0	0.1333	100.906	70.5312	912.039
JS26_cpx1	7 / 3 .	Microphenocryst	57.3032	0.1354	28.5069	0.9537	0.0328	0.0876	9.6532	5.2709	0.3343	0	102.278	14.0696	0
JS26_cpx2	8 / 1 .	Microphenocryst	50.691	1.5128	3.731	10.1773	0.1908	14.824	18.997	0.3854	0	0.279	100.788	72.1946	1908.92
JS26_cpx2	8 / 2 .	Microphenocryst	50.4957	1.4684	3.8791	10.3882	0.1757	14.7649	18.8186	0.3418	0	0.3234	100.656	71.7	2212.7
JS26_cpx2	8 / 3 .	Microphenocryst	50.2826	1.7169	3.8211	11.5028	0.2215	14.5472	18.351	0.4075	0.0031	0.1336	100.987	69.2717	914.091
JS26_cpx3	9 / 1 .	Microphenocryst	49.7289	1.6019	4.3535	10.1064	0.1868	14.3444	19.0095	0.3699	0	0.441	100.142	71.6717	3017.32
JS26_cpx3	9 / 2 .	Microphenocryst	50.5635	1.7412	4.6627	10.7073	0.1736	14.6169	18.5821	0.357	0	0.3898	101.794	70.8745	2667.01
JS26_cpx3	9 / 3 .	Microphenocryst	50.65	1.6887	3.8467	11.7498	0.2177	14.7333	18.4908	0.3969	0	0.1053	101.879	69.0898	720.463
JS26_cpx4	10 / 1 .	Microphenocryst	50.7381	1.5146	3.671	10.2393	0.1902	14.4601	18.4673	0.3603	0	0.2191	99.86	71.5695	1499.08
JS26_cpx4	10 / 2 .	Microphenocryst	52.6852	0.9452	2.1614	10.2104	0.2147	16.2209	17.845	0.2702	0.0016	0.1995	100.754	73.9031	1364.98
JS26_cpx4	10 / 3 .	Microphenocryst	52.0819	1.0837	1.8801	11.0814	0.1982	15.6087	17.7986	0.3089	0	0.0334	100.075	71.5166	228.523
JS26_cpx5	11 / 1 .	Microphenocryst	52.8429	0.9891	2.0993	10.3522	0.2418	16.4329	18.0727	0.3406	0.0047	0.1049	101.481	73.8876	717.726
JS26_cpx5	11 / 2 .	Microphenocryst	50.5462	1.7079	4.4319	10.616	0.2102	14.935	18.4564	0.3831	0.0065	0.3364	101.629	71.4918	2301.65
JS26_cpx6	12 / 1 .	Microphenocryst	50.4908	1.5237	3.9904	10.2451	0.1977	14.7599	18.5719	0.3513	0.0097	0.3902	100.531	71.9738	2669.75
JS26_cpx6	12 / 2 .	Microphenocryst	50.7753	1.61	4.0619	10.0155	0.1167	14.7339	19.0705	0.359	0.0129	0.3634	101.119	72.3935	2486.38
JS26_cpx6	12 / 3 .	Microphenocryst	48.9898	1.5365	3.8463	10.0796	0.1714	14.5471	18.5403	0.3642	0	0.2605	98.3358	72.0093	1782.34
JS27_Cpx1	15 / 1 .	Microphenocryst	49.5376	1.5478	3.7627	12.742	0.0167	13.9751	17.4734	0.44	0.0005	0.0413	99.537	66.1597	282.575
JS27_Cpx1	15 / 2 .	Microphenocryst	50.0809	1.3562	3.743	11.8597	0.0486	14.2833	17.9744	0.3459	0	0.1254	99.8174	68.222	857.987
JS27_Cpx1	15 / 3 .	Microphenocryst	49.4935	1.5313	3.8413	12.1279	0.083	14.1283	18.009	0.393	0.0019	0.1075	99.7167	67.4963	735.515
JS27_Cpx2	16 / 1 .	Microphenocryst	49.2072	1.4743	3.646	11.9345	0.0799	14.1212	18.126	0.38	0.0151	0.0847	99.0689	67.837	579.517
JS27_Cpx2	16 / 2 .	Microphenocryst	49.2203	1.4893	3.5968	13.1409	0	14.2694	17.4335	0.4043	0.0182	0.035	99.6078	65.9358	239.47
JS27_Cpx2	16 / 3 .	Microphenocryst	49.9967	1.7224	2.6057	15.077	0.0685	12.6012	17.7301	0.4023	0.0193	0.0161	100.239	59.8368	110.156
NMSB13_Cpx1	13 / 1 .	Microphenocryst	48.7394	2.5595	4.8315	12.3174	0.1643	13.3832	18.3324	0.4151	0.0143	0.0972	100.854	65.9493	665.042
NMSB13_Cpx1	13 / 2 .	Microphenocryst	50.5817	2.2068	3.6133	12.7786	0.2237	13.2038	18.2842	0.4024	0	0.0277	101.322	64.8119	189.523
NMSB13_Cpx2	14 / 1 .	Microphenocryst	49.0632	2.2001	4.6597	11.7286	0.2021	13.828	18.1898	0.4072	0	0.119	100.398	67.7589	814.198
NMSB13_Cpx2	14 / 2 .	Microphenocryst	49.1218	1.9982	3.3065	12.7578	0.2421	13.7453	18.0915	0.3784	0.0116	0.0212	99.6744	65.7596	145.05
NMSB13_Cpx3	15 / 1 .	Microphenocryst	49.6457	2.0521	3.9202	12.0289	0.2233	13.6751	18.3452	0.392	0.0059	0.061	100.35	66.9586	417.362
NMSB13_Cpx3	15 / 2 .	Microphenocryst	48.4312	2.5725	4.5671	13.9063	0.2356	13.3303	17.1877	0.4249	0.0008	0.0518	100.708	63.0822	354.416
NMSB13_Cpx3	15 / 3 .	Microphenocryst	49.6008	2.1818	3.3642	12.7447	0.2794	13.3964	18.3234	0.4087	0.009	0.0097	100.318	65.2017	66.3674
NMSB13_Cpx4	16 / 1 .	Groundmass	49.8826	2.1332	3.3762	12.9511	0.1969	13.1979	18.3025	0.3994	0	0.0133	100.453	64.4952	90.9986
NMSB13_Cpx4	16 / 2 .	Groundmass	50.2964	2.0883	2.7315	14.265	0.3424	12.9602	17.7571	0.3891	0	0.0257	100.856	61.8248	175.839
NMSB13_Cpx5	17 / 1 .	Groundmass	50.4499	1.7507	3.5239	12.8522	0.2147	13.9932	17.9952	0.4016	0	0.0893	101.271	65.9957	610.991
NMSB13_Cpx5	17 / 2 .	Groundmass	54.8264	0.1894	26.1942	1.6929	0.0123	0.705	8.7313	4.7231	0.4109	0	97.4857	42.6058	0
NMSB13_Cpx6	18 / 1 .	Microphenocryst	48.6784	2.4598	4.9285	11.3128	0.1507	13.3931	19.0121	0.361	0	0.1785	100.475	67.8492	1221.3
NMSB13_Cpx6	18 / 2 .	Microphenocryst	49.2173	2.3538	4.5186	11.4863	0.1436	13.4976	18.6078	0.4281	0.0011	0.2084	100.463	67.6865	1425.87
NMSB55_cpx1	1 / 1 .	Groundmass	51.6308	1.1262	2.9082	9.9129	0.1754	15.3938	18.8529	0.3948	0	0.1391	100.534	99.4808	951.722
NMSB55_cpx2	2 / 1 .	Groundmass	51.9632	1.2854	2.4901	10.7388	0.2217	15.0751	18.3092	0.4018	0	0.0659	100.551	99.3253	450.888
NMSB61_cpx1	3 / 1 .	Groundmass	46.3341	0.0267	5.0565	23.8729	0.1882	16.2735	2.2904	0.0457	0.1877	0.0147	94.2903	95.5935	100.577
NMSB61_cpx2	4 / 1 .	Groundmass	50.0201	1.8041	3.5264	12.0337	0.2474	13.8451	17.8289	0.3869	0.0095	0.02	99.722	99.2276	136.84
NMSB61_cpx3	5 / 1 .	Groundmass	47.6073	2.4152	4.5489	13.17	0.2387	13.5381	17.3265	0.4159	0.0014	0.0373	99.2993	99.2331	255.207
NMSB64_cpx1	6 / 1 .	Microphenocryst	47.8184	0.0563	28.3021	0.2015	0.0031	0	12.8713	0.6435	0.2171	0.023	90.1362	99.9865	157.366
NMSB64_cpx2	7 / 1 .	Microphenocryst	52.5382	1.1463	2.1093	9.8958	0.1816	15.501	18.5939	0.3571	0	0.0914	100.414	99.4551	625.359
NMSB64_cpx2	7 / 2 .	Microphenocryst	50.1522	1.8992	3.9168	10.2942	0.1722	14.0056	19.1195	0.4239	0	0.0379	100.021	99.4973	259.312
NMSB64_cpx2	7 / 3 .	Microphenocryst	49.3334	2.1185	4.297	10.7869	0.1902	13.7798	19.0622	0.4579	0	0.0614	100.087	99.4434	420.099
NMSB64_cpx3	8 / 1 .	Microphenocryst	49.9876	2.4315	3.3377	11.5047	0.2172	13.3868	18.8042	0.5738	0	0.0383	100.282	99.3562	262.049
NMSB64_cpx3	8 / 2 .	Microphenocryst	50.2736	1.9718	2.601	11.4175	0.2597	13.7317	18.6695	0.5379	0.0188	0.0024	99.4837	99.2257	16.4208
NMSB64_cpx4	9 / 1 .	Microphenocryst	49.3387	1.967	4.4765	9.9954	0.1803	14.1494	18.9527	0.425	0.0018	0.1233	99.6102	99.4692	843.619
NMSB64_cpx4	9 / 2 .	Microphenocryst	49.1044	2.1377	4.7004	10.2648	0.163	13.9441	18.8645	0.4037	0.0075	0.1463	99.7367	99.5176	1000.98
NMSB64_cpx5	10 / 1 .	Microphenocryst	48.9543	2.9726	4.1012	11.4971	0.2101	13.169	18.4228	0.5992	0.0048	0.0391	99.9702	99.3643	267.522
NMSB64_cpx5	10 / 2 .	Microphenocryst	49.9179	2.1515	2.8269	11.6047	0.2364	13.4707	18.4363	0.5767	0.0027	0.0093	99.233	99.2858	63.6306
NMSB64_cpx6	11 / 1 .	Microphenocryst	48.6734	2.3593	4.3639	11.219	0.2062	13.6224	18.7419	0.4785	0	0.054	99.7185	99.3866	369.468
NMSB64_cpx6	11 / 2 .	Microphenocryst	50.5159	2.0075	3.8313	10.5085	0.1964	13.7905	19.045	0.4415	0.0008	0.0352	100.373	99.4248	240.838
NMSB64_cpx7	12 / 1 .	Microphenocryst	49.4385	2.2794	4.0368	10.9579	0.2296	13.5979	19.0159	0.4805	0	0.049	100.085	99.3272	335.258
NMSB64_cpx7	12 / 2 .	Microphenocryst	49.0268	2.2354	3.9878	11.0241	0.1982	13.59	18.9265	0.5154	0.0136	0.0472	99.565	99.416	322.942
NMBS64_cpx8	1 / 1 .	Microphenocryst	53.251	0.1092	28.9345	1.65	0.001	0.4403	10.3532	4.5602	0.2765	0	99.5757	99.9946	0
NMSB68_cpx1	13 / 1 .	Groundmass	50.4314	1.5351	3.1332	11.9691	0.2404	14.4408	17.9779	0.3508	0.0022	0.0382	100.119	99.2554	261.364
NMSB68_cpx1	13 / 2 .	Groundmass	51.1136	1.2755	2.077	12.9218	0.3097	14.2804	17.5702	0.3554	0.0054	0	99.909	99.0209	0
NMSB68_cpx2	14 / 1 .	Groundmass	50.2712	1.4657	2.9964	11.5693	0.3132	14.5177	18.1856	0.3554	0.0002	0.0426	99.7174	99.0431	291.469
NMSB68_cpx2	14 / 2 .	Groundmass	51.7412	1.1659	2.1682	14.8543	0.3508	13.8245	16.016	0.3012	0	0.0239	100.446	98.7862	163.524
NMSB68_cpx3	15 / 1 .	Groundmass	51.6574	1.1111	2.0306	11.2216	0.2914	14.8103	18.5915	0.3324	0.0113	0.0272	100.085	99.1284	186.102
NMSB68_cpx3	15 / 2 .	Groundmass	50.9603	1.0783	1.3971	14.9222	0.4452	13.7016	16.6198	0.3793	0.0069	0.0044	99.515	98.5195	30.1048
NMSB68_cpx4	16 / 1 .	Groundmass	48.5803	2.6757	3.9899	13.7943	0.3139	12.56	18.0255	0.4155	0.0056	0.0081	100.369	99.0325	55.4202
NMSB68_cpx5	17 / 1 .	Groundmass	49.741	1.4816	3.502	13.8371	0.2879	13.9692	16.0067	0.4106	0.1136	0	99.3495	99.0011	0
Notes
On any given grain, point 1 = core analysis, 2 = midpoint analysis, 3 = rim analysis. Where only 2 points are analyzed, 1 = core and 2 = rim. Where more than 3 points are analyzed, 1 = core, final point = rim, and all others are midpoints increasingly farther from the core.
Bolded Mg# indicates a core analysis.
Red text indicates an erroneous analysis (not clinopyroxene or off grain). These data were not used for any plots, calculations or models.
Orange text indicates low or high total. These data were not used for any plots, calculations or models.

## Sheet: Plagioclase
Sample_Grain	Grain # / Point	Grain Type	SiO2 wt.%	TiO2 wt.%	Al2O3 wt.%	FeO wt.%	MgO wt.%	CaO wt.%	Na2O wt.%	K2O wt.%	Total	An
MF9466_plag1	1 / 1 .	Megaphenocryst	51.6049	0.0478	29.763	0.4869	0.1749	12.7907	3.6414	0.2291	98.7387	65.9999
MF9466_plag1	1 / 2 .	Megaphenocryst	51.7053	0.1003	29.3028	0.5222	0.1806	12.5413	3.9968	0.2514	98.6007	63.4245
MF9466_plag1	1 / 3 .	Megaphenocryst	49.6866	0.0539	31.0474	0.5077	0.1657	14.4338	2.9091	0.1259	98.9302	73.2759
MF9466_plag1	1 / 4 .	Megaphenocryst	50.7962	0.067	30.5083	0.5278	0.1685	13.47	3.5098	0.2475	99.2951	67.9581
MF9466_plag2	2 / 1 .	Megaphenocryst	50.9417	0.0643	30.0077	0.4896	0.1835	13.1995	3.5516	0.1888	98.6267	67.2545
MF9466_plag2	2 / 2 .	Megaphenocryst	51.952	0.079	29.3862	0.564	0.1684	12.7824	3.9322	0.2175	99.0818	64.2403
MF9466_plag2	2 / 3 .	Megaphenocryst	51.413	0.0742	29.9262	0.5306	0.1457	12.9637	3.8018	0.2178	99.0729	65.3309
MF9466_plag2	2 / 4 .	Megaphenocryst	51.7053	0.0831	30.0275	0.4754	0.1899	13.2449	3.5119	0.195	99.4331	67.5769
MF9466_plag3	3 / 1 .	Megaphenocryst	51.6759	0.0937	29.7937	0.4739	0.1618	12.9763	3.6871	0.1994	99.0619	66.0433
MF9466_plag3	3 / 2 .	Megaphenocryst	49.1879	0.0617	30.888	0.5443	0.1638	14.639	2.8845	0.1298	98.4991	73.7163
MF9466_plag3	3 / 3 .	Megaphenocryst	50.7624	0.0602	30.5582	0.5062	0.1881	13.738	3.4231	0.1487	99.3849	68.9238
MF9466_plag4	4 / 1 .	Groundmass	50.4251	0.0995	30.4729	0.8514	0.1045	13.6127	3.4504	0.1835	99.2	68.5562
MF9466_plag4	4 / 2 .	Groundmass	55.3704	1.4015	23.9737	0.9924	0.034	8.0409	5.1873	1.712	96.7121	46.1394
MF9466_plag5	5 / 1 .	Groundmass	50.5613	0.0876	29.9436	0.6781	0.2102	13.3171	3.5067	0.1674	98.4721	67.7283
MF9466_plag5	5 / 2 .	Groundmass	56.3708	0.1087	26.3408	0.7303	0.0741	8.7822	5.7613	0.5088	98.677	45.723
MF9466_plag6	6 / 1 .	Groundmass	53.91	0.1269	28.2262	0.6483	0.1357	10.854	4.9163	0.3188	99.1362	54.9566
MF9466_plag6	6 / 2 .	Groundmass	51.9162	0.1084	29.3695	0.872	0.1345	12.0718	4.323	0.1818	98.9774	60.6795
MF9466_plag7	7 / 1 .	Phenocryst	50.7325	0.0733	30.0615	0.5637	0.142	13.1975	3.4821	0.2128	98.4655	67.6849
MF9466_plag7	7 / 2 .	Phenocryst	51.0251	0.0902	29.8485	0.5618	0.1562	13.1626	3.5954	0.2016	98.6414	66.9221
MF9466_plag7	7 / 3 .	Phenocryst	52.3444	0.0987	29.0847	0.6068	0.1995	12.2634	4.0189	0.215	98.8314	62.7744
MF9466_plag7	7 / 4 .	Phenocryst	48.9763	0.0591	30.8136	0.5072	0.1859	14.5013	2.8597	0.1283	98.0314	73.7005
MF9466_plag8	8 / 1 .	Phenocryst	50.0378	0.0592	31.2666	0.5071	0.1816	14.3913	2.9531	0.1214	99.5179	72.9228
MF9466_plag8	8 / 2 .	Phenocryst	50.2723	0.0627	30.4014	0.5271	0.2116	13.7617	3.291	0.1616	98.6893	69.7967
MF9466_plag8	8 / 3 .	Phenocryst	50.273	0.0649	30.9198	0.4767	0.1986	14.0751	3.1518	0.1553	99.3151	71.1642
MF9466_plag8	8 / 4 .	Phenocryst	51.0825	0.0844	30.3004	0.6524	0.1842	13.5467	3.3623	0.158	99.3709	69.0072
MF9466_plag9	9 / 1 .	Microphenocryst	50.9559	0.0595	30.7946	0.5125	0.1846	13.7785	3.4171	0.1463	99.849	69.0243
MF9466_plag9	9 / 2 .	Microphenocryst	50.7854	0.0568	30.7459	0.4535	0.184	13.7843	3.1918	0.1548	99.3565	70.4722
MF9466_plag9	9 / 3 .	Microphenocryst	51.4299	1.4159	8.432	13.1914	8.424	13.758	2.267	0.2331	99.1513	77.0317
MF9466_plag10	10 / 1 .	Phenocryst	51.017	0.0681	30.3679	0.5999	0.1273	13.4249	3.4506	0.1972	99.2529	68.2547
MF9466_plag10	10 / 2 .	Phenocryst	52.308	0.0716	29.4032	0.5781	0.1687	12.7346	3.7369	0.1944	99.1955	65.3171
MF9466_plag10	10 / 3 .	Phenocryst	52.4523	0.0754	29.4501	0.5294	0.211	12.5429	3.8049	0.1712	99.2372	64.5611
MF9466_plag11	11 / 1 .	Groundmass	53.011	0.1546	29.034	0.6636	0.239	12.0901	4.1799	0.2276	99.5997	61.5156
MF9466_plag11	11 / 2 .	Groundmass	51.3648	0.0862	29.8381	0.7179	0.1356	12.9938	3.5821	0.1926	98.9109	66.7181
MF9466_plag12	12 / 1 .	Groundmass	50.8256	0.0823	30.3898	0.6623	0.1286	13.4593	3.3229	0.1765	99.0472	69.1208
MF9466_plag12	12 / 2 .	Groundmass	51.9256	0.1067	29.4891	0.7489	0.1472	12.5469	3.8498	0.25	99.0642	64.2996
MF9466_plag13	13 / 1 .	Megaphenocryst	51.732	0.1087	29.0754	0.4745	0.1784	12.2672	3.9769	0.2299	98.043	63.0268
MF9466_plag13	13 / 2 .	Megaphenocryst	52.602	0.0977	29.3767	0.6633	0.2243	12.497	3.9264	0.2305	99.6179	63.754
MF9466_plag13	13 / 3 .	Megaphenocryst	52.0223	0.0941	30.05	0.5346	0.1712	12.9442	3.7216	0.2027	99.7406	65.7784
MF9466_plag13	13 / 4 .	Megaphenocryst	52.458	0.0852	29.9493	0.4698	0.1842	12.6642	3.7381	0.2174	99.7661	65.1841
MF9466_plag13	13 / 5 .	Megaphenocryst	49.994	0.0763	31.243	0.5142	0.1882	14.3239	2.9244	0.1292	99.3934	73.0228
MF9466_plag14	14 / 1 .	Megaphenocryst	50.604	0.0659	30.9177	0.4924	0.1809	14.1594	3.1585	0.1238	99.7026	71.2431
MF9466_plag14	14 / 2 .	Megaphenocryst	52.1356	0.0865	29.7346	0.4621	0.1833	12.9229	3.752	0.1913	99.4683	65.5578
MF9466_plag14	14 / 3 .	Megaphenocryst	50.0529	0.0525	31.5642	0.4991	0.1782	14.3943	2.9615	0.1269	99.8295	72.8708
MF9466_plag15	15 / 1 .	Megaphenocryst	52.1864	0.0787	29.8126	0.5333	0.1185	12.6405	3.6921	0.2933	99.3554	65.4222
MF9466_plag15	15 / 2 .	Megaphenocryst	53.0886	0.0828	29.5025	0.5659	0.1247	12.0394	4.0577	0.3076	99.7693	62.1168
MF9466_plag15	15 / 3 .	Megaphenocryst	52.1411	0.0946	29.9074	0.6109	0.1483	11.6517	4.063	0.2993	98.9165	61.3126
MF9466_plag15	15 / 4 .	Megaphenocryst	52.986	0.0738	29.6869	0.5277	0.1531	12.4357	3.9355	0.2868	100.085	63.5867
MF9466_plag15	15 / 5 .	Megaphenocryst	49.6143	0.0551	31.1002	0.4595	0.1858	14.305	2.8076	0.1154	98.6428	73.7926
MF9466_plag15	15 / 6 .	Megaphenocryst	53.888	0.1191	28.3334	0.6676	0.1224	11.0845	4.6831	0.2837	99.1816	56.6731
MF9466_plag16	16 / 1 .	Microphenocryst	51.2177	0.0767	29.9173	0.5996	0.2133	13.3607	3.5229	0.1649	99.0731	67.699
MF9466_plag16	16 / 2 .	Microphenocryst	49.8848	0.0611	30.5363	0.5151	0.1649	14.0616	3.1566	0.1582	98.5386	71.1133
MF9466_plag16	16 / 3 .	Microphenocryst	51.1374	0.0938	29.6748	0.5418	0.2264	13.0978	3.547	0.1554	98.4744	67.1126
MF9466_plag16	16 / 4 .	Microphenocryst	49.5774	0.0645	30.8637	0.588	0.1871	14.2738	3.027	0.1212	98.7028	72.268
MF9466_plag17	17 / 1 .	Microphenocryst	52.8423	0.1156	28.8	0.7115	0.1097	11.6118	4.3807	0.2948	98.8663	59.4296
MF9466_plag17	17 / 2 .	Microphenocryst	57.163	0.1217	26.2031	0.7216	0.0573	8.2398	6.2741	0.5524	99.333	42.055
MF9466_plag18	18 / 1 .	Megaphenocryst	52.0992	0.1017	29.3212	0.5793	0.1374	12.3905	3.9709	0.2862	98.8865	63.2946
MF9466_plag18	18 / 2 .	Megaphenocryst	52.6101	0.0947	29.5627	0.5717	0.1287	12.2431	3.991	0.2676	99.4695	62.8984
MF9466_plag18	18 / 3 .	Megaphenocryst	52.1112	0.0908	29.582	0.6459	0.1272	12.3912	3.8809	0.2839	99.1131	63.8269
MF9466_plag18	18 / 4 .	Megaphenocryst	52.4311	0.0835	29.4984	0.5746	0.1289	12.0897	3.9537	0.2805	99.0403	62.8232
MF9466_plag18	18 / 5 .	Megaphenocryst	52.3337	0.0843	29.329	0.5451	0.1231	11.9928	4.1049	0.3118	98.8246	61.7527
MF9466_plag18	18 / 6 .	Megaphenocryst	51.9594	0.0987	29.7745	0.5935	0.1387	12.6323	3.847	0.2517	99.2958	64.4718
MF9466_plag19	19 / 1 .	Phenocryst	49.4033	0.0762	31.0214	0.4777	0.1727	14.3062	2.8581	0.1129	98.4284	73.448
MF9466_plag19	19 / 2 .	Phenocryst	49.2387	0.0473	31.2365	0.5119	0.1863	14.6314	2.8303	0.1266	98.8089	74.0722
MF9466_plag19	19 / 3 .	Phenocryst	50.3497	0.0537	30.5633	0.5397	0.1912	13.8013	3.1528	0.1432	98.7951	70.7528
MF9466_plag19	19 / 4 .	Phenocryst	49.8617	0.0495	30.6545	0.5016	0.1927	14.1627	2.831	0.1422	98.3958	73.4372
MF9466_plag20	20 / 1 .	Phenocryst	49.6091	0.0589	30.4654	0.4123	0.172	13.8826	3.0591	0.1327	97.7921	71.4931
MF9466_plag20	20 / 2 .	Phenocryst	49.4112	0.0708	30.4219	0.4981	0.1952	13.9078	3.1311	0.1315	97.7676	71.0539
MF9466_plag20	20 / 3 .	Phenocryst	49.1923	0.0544	30.744	0.4656	0.1758	14.3154	2.855	0.1214	97.9239	73.4817
MF9466_plag20	20 / 4 .	Phenocryst	50.6057	0.0731	29.7547	0.5154	0.195	13.3677	3.3653	0.1534	98.0302	68.7028
MF9466_plag21	21 / 1 .	Phenocryst	49.6683	0.0523	30.3652	0.4972	0.1875	13.7767	3.079	0.1482	97.7744	71.204
MF9466_plag21	21 / 2 .	Phenocryst	49.5755	0.0538	30.3362	0.4466	0.1855	13.7532	3.1064	0.145	97.6023	70.9869
MF9466_plag21	21 / 3 .	Phenocryst	49.3292	0.0659	30.6427	0.4237	0.1739	14.0302	2.9416	0.1254	97.7325	72.4959
MF9466_plag22	22 / 1 .	Phenocryst	50.752	0.0622	29.9682	0.5406	0.1077	13.1974	3.4185	0.2411	98.2876	68.0867
MF9466_plag22	22 / 2 .	Phenocryst	52.5848	0.0736	29.2712	0.5168	0.1096	12.166	3.8635	0.2983	98.8837	63.5066
MF9466_plag22	22 / 3 .	Phenocryst	52.2744	0.0706	29.2329	0.5302	0.0997	12.2431	3.952	0.2743	98.6772	63.1272
MF9466_plag22	22 / 4 .	Phenocryst	51.6726	0.1004	28.4684	0.4612	0.3418	11.8282	3.6452	0.2646	96.7824	64.1991
MF9466_plag22	22 / 5 .	Phenocryst	51.9262	0.0687	29.2806	0.4131	0.1569	12.3499	3.8287	0.2058	98.2299	64.0621
MF9466_plag22	22 / 6 .	Phenocryst	48.6818	0.0635	31.1594	0.5567	0.1816	14.55	2.6846	0.1118	97.9894	74.9697
MF9466_plag23	23 / 1 .	Phenocryst	51.6565	0.0771	29.4438	0.5506	0.1146	12.6186	3.7281	0.2965	98.4858	65.163
MF9466_plag23	23 / 2 .	Phenocryst	52.2812	0.0908	29.171	0.654	0.1141	12.3014	3.7917	0.2902	98.6944	64.195
MF9466_plag23	23 / 3 .	Phenocryst	51.7798	0.0908	29.4474	0.5726	0.1039	12.6649	3.6048	0.2865	98.5508	66.0048
MF9466_plag23	23 / 4 .	Phenocryst	52.3557	0.0858	29.2132	0.5899	0.127	12.1538	3.9722	0.3036	98.8013	62.8377
MF9467_plag1	24 / 1 .	Megaphenocryst	51.0611	0.0803	30.4003	0.4266	0.1711	13.4223	3.5722	0.1657	99.2996	67.4953
MF9467_plag1	24 / 2 .	Megaphenocryst	49.6688	0.0678	30.3399	0.4142	0.1693	13.7249	3.2147	0.1546	97.7542	70.233
MF9467_plag1	24 / 3 .	Megaphenocryst	49.3851	0.066	30.4975	0.5269	0.1883	13.4425	3.3138	0.1435	97.5636	69.1526
MF9467_plag1	24 / 4 .	Megaphenocryst	50.2811	0.074	29.6576	0.4512	0.169	13.2309	3.5935	0.1694	97.6266	67.0482
MF9467_plag2	25 / 1 .	Megaphenocryst	48.9991	0.0577	28.71	0.4213	0.1624	13.0931	3.7808	0.1604	95.3848	65.6805
MF9467_plag2	25 / 2 .	Megaphenocryst	50.2015	0.0798	30.9273	0.4829	0.1602	14.0776	3.2557	0.1389	99.3239	70.4978
MF9467_plag2	25 / 3 .	Megaphenocryst	49.6932	0.0639	30.8857	0.4876	0.1618	13.9223	3.3109	0.1184	98.6438	69.9141
MF9467_plag2	25 / 4 .	Megaphenocryst	51.0804	0.0676	30.6807	0.5399	0.1892	13.6344	3.4929	0.1759	99.8611	68.3262
MF9467_plag2	25 / 5 .	Megaphenocryst	51.6012	0.0574	30.2223	0.5163	0.164	13.1005	3.6714	0.1636	99.4965	66.3519
MF9467_plag3	26 / 1 .	Phenocryst	50.7215	0.0732	30.8202	0.5783	0.2527	13.7943	3.3297	0.1525	99.7223	69.5998
MF9467_plag3	26 / 2 .	Phenocryst	50.7703	0.0666	30.804	0.4863	0.1604	13.4993	3.4106	0.1738	99.3713	68.6259
MF9467_plag3	26 / 3 .	Phenocryst	50.7797	0.0707	30.5091	0.4816	0.1709	13.4301	3.4591	0.1896	99.0906	68.2098
MF9467_plag3	26 / 4 .	Phenocryst	51.6484	0.0638	30.6076	0.5157	0.1472	13.3611	3.5861	0.1828	100.113	67.3096
MF9467_plag4	27 / 1 .	Groundmass	52.1283	0.1088	29.877	0.6688	0.1287	12.3079	4.1342	0.1481	99.5017	62.1962
MF9467_plag4	27 / 2 .	Groundmass	33.1984	0.0956	18.9761	0.8913	0.2785	10.9609	3.8498	0.1524	68.403	61.1412
MF9467_plag5	28 / 1 .	Groundmass	52.0583	0.1098	29.9851	0.9466	0.0682	12.3432	4.158	0.2274	99.8965	62.1286
MF9467_plag5	28 / 2 .	Groundmass	56.0363	0.1255	27.1987	1.0404	0.0592	9.3792	5.5979	0.4276	99.8648	48.077
MF9467_plag6	29 / 1 .	Microphenocryst	50.3965	0.0836	29.9608	0.5909	0.1478	13.2575	3.5061	0.2179	98.161	67.6339
MF9467_plag6	29 / 2 .	Microphenocryst	50.1901	0.0616	31.4002	0.548	0.1531	14.3325	3.1283	0.1627	99.9765	71.6868
MF9467_plag6	29 / 3 .	Microphenocryst	51.2621	0.095	30.6616	0.5387	0.2185	13.7388	3.4193	0.1575	100.091	68.9488
MF9467_plag6	29 / 4 .	Microphenocryst	51.0497	0.0919	30.7016	0.6888	0.1305	13.6809	3.4623	0.1751	99.9808	68.5897
MF9467_plag6	29 / 5 .	Microphenocryst	50.9326	0.1356	23.1451	9.4684	4.1586	7.1768	4.3967	0.4742	99.8881	47.4257
MF9467_plag7	30 / 1 .	Groundmass	52.2907	0.1151	29.7093	0.9362	0.1421	12.6033	3.9467	0.2219	99.9654	63.8306
MF9467_plag7	30 / 2 .	Groundmass	55.2957	0.1246	27.8651	0.7542	0.0925	10.1438	5.151	0.4666	99.8935	52.114
MF9467_plag8	31 / 1 .	Groundmass	54.1257	0.1504	28.3284	0.8062	0.0723	10.6007	5.3201	0.2354	99.6392	52.4073
MF9467_plag8	31 / 2 .	Groundmass	55.1156	0.16	27.7421	0.8321	0.0689	9.9076	5.3172	0.333	99.4765	50.7323
MF9467_plag9	32 / 1 .	Groundmass	52.1022	0.1033	29.1524	0.707	0.2113	12.3227	3.8726	0.2228	98.6943	63.7483
MF9467_plag9	32 / 2 .	Groundmass	53.9035	0.1182	28.4367	0.8842	0.214	11.1958	4.5346	0.3196	99.6066	57.7066
MF9467_plag10	33 / 1 .	Phenocryst	49.9381	0.0684	31.0352	0.553	0.1403	14.1473	3.153	0.1444	99.1797	71.2613
MF9467_plag10	33 / 2 .	Phenocryst	50.2227	0.0767	30.9466	0.5368	0.1669	14.1989	3.1341	0.1292	99.412	71.4586
MF9467_plag10	33 / 3 .	Phenocryst	48.508	0.0762	31.6086	0.5396	0.1279	13.3554	2.8864	0.329	97.4312	71.8867
MF9467_plag10	33 / 4 .	Phenocryst	50.2397	0.0817	31.1876	0.5349	0.1576	14.1669	3.2787	0.1519	99.799	70.4829
MF9467_plag10	33 / 5 .	Phenocryst	51.6623	0.0873	30.6048	0.6637	0.1659	13.5458	3.5001	0.1654	100.395	68.1402
MF9467_plag11	34 / 1 .	Microphenocryst	50.5528	0.0816	31.029	0.5225	0.175	14.0646	3.2586	0.1478	99.8319	70.46
MF9467_plag11	34 / 2 .	Microphenocryst	50.522	0.0555	31.1446	0.472	0.1665	13.9063	3.2454	0.1333	99.6456	70.3087
MF9467_plag11	34 / 3 .	Microphenocryst	50.0057	0.0953	30.7873	0.5454	0.171	13.879	3.0427	0.1179	98.6444	71.5972
MF9467_plag11	34 / 4 .	Microphenocryst	52.752	0.0812	29.9892	0.786	0.1263	12.6573	4.0617	0.1985	100.652	63.2643
MF9467_plag12	35 / 1 .	Groundmass	55.4326	0.0939	27.7458	0.8029	0.0888	9.9688	5.412	0.3772	99.922	50.4445
MF9467_plag12	35 / 2 .	Groundmass	55.5476	0.1284	27.5056	0.8031	0.0636	9.7491	5.3703	0.4393	99.607	50.0808
MF9467_plag13	36 / 1 .	Phenocryst	50.876	0.0666	30.7389	0.4739	0.1592	13.5092	3.3791	0.1355	99.3384	68.8411
MF9467_plag13	36 / 2 .	Phenocryst	50.8354	0.0806	30.5822	0.4672	0.1641	13.6156	3.4174	0.1626	99.3252	68.7676
MF9467_plag13	36 / 3 .	Phenocryst	49.9004	0.0924	31.172	0.5401	0.1661	14.3109	3.1192	0.1394	99.4404	71.7153
MF9467_plag13	36 / 4 .	Phenocryst	69.9991	0.7689	14.3227	1.4542	0.4945	1.6807	4.1809	3.8043	96.7051	18.1774
MF9467_plag14	37 / 1 .	Microphenocryst	50.5921	0.0851	31.2099	0.5705	0.1871	14.2537	3.1066	0.1459	100.151	71.7162
MF9467_plag14	37 / 2 .	Microphenocryst	50.5369	0.0624	31.3696	0.5124	0.1579	14.1478	3.1482	0.1811	100.116	71.2932
MF9467_plag14	37 / 3 .	Microphenocryst	51.4252	0.092	30.8576	0.5746	0.1459	13.7658	3.4058	0.1534	100.42	69.0754
MF9467_plag14	37 / 4 .	Microphenocryst	50.8182	0.0908	30.2078	0.721	0.1945	13.2713	3.2802	0.3589	98.9426	69.0966
MF9467_plag15	38 / 1 .	Phenocryst	50.1336	0.0819	31.248	0.6133	0.2432	14.5266	2.9249	0.1386	99.9101	73.2954
MF9467_plag15	38 / 2 .	Phenocryst	49.8597	0.054	31.659	0.4713	0.1667	14.5021	3.1333	0.1221	99.9683	71.8927
MF9467_plag15	38 / 3 .	Phenocryst	50.3226	0.0832	30.4591	0.5281	0.162	13.6752	3.2458	0.1473	98.6233	69.9551
MF9467_plag16	39 / 1 .	Microphenocryst	50.987	0.0849	31.0744	0.5327	0.1639	13.9377	3.2194	0.1396	100.14	70.5233
MF9467_plag16	39 / 2 .	Microphenocryst	50.9495	0.0713	30.5597	0.546	0.1729	13.5471	3.2289	0.2752	99.3506	69.8669
MF9467_plag16	39 / 3 .	Microphenocryst	49.893	0.0601	30.4026	0.6349	0.1838	14.0196	3.1329	0.1285	98.4555	71.2065
MF9467_plag16	39 / 4 .	Microphenocryst	49.4265	0.0688	30.2767	0.7437	0.1578	13.8493	3.3574	0.1424	98.0227	69.5086
MF9467_plag17	40 / 1 .	Microphenocryst	49.743	0.0733	30.9019	0.4218	0.1537	14.0977	3.0824	0.1421	98.616	71.6515
MF9467_plag17	40 / 2 .	Microphenocryst	49.8093	0.0625	30.783	0.5096	0.1427	14.2295	2.9889	0.1356	98.661	72.4591
MF9467_plag17	40 / 3 .	Microphenocryst	50.5395	0.0786	30.9423	0.5458	0.1797	13.9193	3.1604	0.1325	99.4981	70.879
MF9467_plag17	40 / 4 .	Microphenocryst	51.8402	0.0908	29.8834	0.7329	0.1584	12.8686	3.715	0.1938	99.483	65.6864
MF9467_plag18	41 / 1 .	Microphenocryst	50.8199	0.0609	30.6086	0.4868	0.1589	13.8254	3.2918	0.1263	99.3786	69.8889
MF9467_plag18	41 / 2 .	Microphenocryst	49.1227	0.0936	30.7456	0.5555	0.1973	13.7716	3.046	0.1613	97.6936	71.4169
MF9467_plag18	41 / 3 .	Microphenocryst	50.592	0.0743	30.6045	0.5575	0.1766	13.5432	3.3027	0.2642	99.1151	69.3829
MF9467_plag18	41 / 4 .	Microphenocryst	49.746	0.0573	30.7905	0.5202	0.1714	14.026	3.2428	0.1595	98.7136	70.504
MF9467_plag18	41 / 5 .	Microphenocryst	46.5203	0.0902	28.8514	0.6777	0.1506	13.7858	3.2087	0.168	93.4527	70.3644
MF9467_plag19	42 / 1 .	Phenocryst	50.4614	0.0752	31.0425	0.5794	0.1524	13.8284	3.2344	0.1361	99.5099	70.2623
MF9467_plag19	42 / 2 .	Phenocryst	50.7118	0.0741	30.9848	0.4787	0.1848	13.9059	3.1303	0.2549	99.7254	71.0564
MF9467_plag19	42 / 3 .	Phenocryst	51.44	0.0891	29.9948	0.569	0.1829	13.1176	3.7601	0.1868	99.3403	65.8462
MF9467_plag19	42 / 4 .	Phenocryst	51.4351	0.0951	29.5693	0.7502	0.0843	12.4722	3.8909	0.2344	98.5315	63.9179
MF9467_plag19	42 / 5 .	Phenocryst	55.4906	0.1097	27.2391	0.6817	0.0701	9.5655	5.3202	0.4266	98.9035	49.8398
MF9467_plag20	43 / 1 .	Microphenocryst	46.7584	0.0754	28.6582	0.581	0.17	13.4476	3.0772	0.1521	92.9199	70.7178
MF9467_plag20	43 / 2 .	Microphenocryst	51.5871	0.0938	30.1871	0.6263	0.2547	12.821	3.732	0.2141	99.516	65.4997
MF9467_plag20	43 / 3 .	Microphenocryst	50.8391	0.0987	29.5323	0.5688	0.1651	12.7707	3.688	0.166	97.8287	65.6787
MF9467_plag20	43 / 4 .	Microphenocryst	51.9037	0.1089	30.4039	0.6617	0.1503	12.1974	3.8313	0.2391	99.4962	63.7599
MF9467_plag21	44 / 1 .	Groundmass	55.3131	0.1767	26.9287	0.9598	0.1113	9.147	5.4242	0.6507	98.7114	48.2381
MF9467_plag21	44 / 2 .	Groundmass	56.1955	0.1262	27.0207	0.7203	0.0666	9.0155	5.5961	0.4955	99.2364	47.0986
MF9468_Plag1	31 / 1 .	Phenocryst	48.7155	0.0531	31.0124	0.4693	0.1461	14.8126	2.7433	0.131	98.0833	74.8994
MF9468_Plag1	31 / 2 .	Phenocryst	49.3996	0.0605	31.0422	0.682	0.3173	14.1036	2.9304	0.168	98.7036	72.6757
MF9468_Plag1	31 / 3 .	Phenocryst	28.1862	0.1203	21.8525	0.7528	0.172	13.2947	0.9886	0.1187	65.4859	88.1402
MF9468_Plag1	31 / 4 .	Phenocryst	49.2932	0.0586	31.2258	0.5044	0.1541	14.6174	2.8235	0.12	98.797	74.1
MF9468_Plag1	31 / 5 .	Phenocryst	50.3028	0.0526	31.1599	0.4934	0.1486	13.9828	3.1615	0.1488	99.4504	70.9657
MF9468_Plag1	31 / 6 .	Phenocryst	51.3164	0.0808	33.0027	0.4811	0.2343	13.5367	4.0349	0.1343	102.821	64.9618
MF9468_Plag1	31 / 7 .	Phenocryst	49.4815	0.0612	30.9064	0.5148	0.1592	14.3558	2.8584	0.1338	98.4711	73.5134
MF9468_Plag1	31 / 8 .	Phenocryst	50.6412	0.0646	30.4045	0.506	0.1549	13.5646	3.5356	0.159	99.0306	67.951
MF9468_Plag1	31 / 9 .	Phenocryst	50.4949	0.0845	30.7243	0.541	0.1786	13.9109	3.138	0.1381	99.2103	71.0132
MF9468_Plag1	31 / 10 .	Phenocryst	50.9588	0.0874	30.3014	0.604	0.1836	13.4565	3.4284	0.1295	99.1495	68.4452
MF9468_Plag2	32 / 1 .	Microphenocryst	49.3965	0.0639	31.1321	0.4882	0.147	14.5746	2.9243	0.1428	98.8695	73.3639
MF9468_Plag2	32 / 2 .	Microphenocryst	51.4196	0.0732	29.3538	0.6521	0.0991	12.593	3.9827	0.2578	98.4313	63.6017
MF9468_Plag2	32 / 3 .	Microphenocryst	50.2941	0.0595	30.7989	0.6587	0.0963	13.8621	3.2057	0.1818	99.157	70.4988
MF9468_Plag2	32 / 4 .	Microphenocryst	50.5722	0.067	30.389	0.5561	0.1817	13.7306	3.4001	0.1526	99.0492	69.0565
MF9468_Plag2	32 / 5 .	Microphenocryst	50.677	0.0944	30.5475	0.6411	0.1703	13.6592	3.2822	0.1646	99.2363	69.6955
MF9468_Plag3	33 / 1 .	Groundmass	52.464	0.1264	28.6496	0.9038	0.1011	11.7804	4.2395	0.3334	98.5982	60.5618
MF9468_Plag4	34 / 1 .	Phenocryst	50.2779	0.0604	31.1466	0.4869	0.1635	14.21	3.0248	0.1268	99.4968	72.1927
MF9468_Plag4	34 / 2 .	Phenocryst	46.8028	0.0484	29.2957	0.4932	0.151	14.096	2.6189	0.1213	93.6272	74.8396
MF9468_Plag4	34 / 3 .	Phenocryst	50.2924	0.0594	31.1783	0.5258	0.1559	14.2471	3.1354	0.1193	99.7135	71.5192
MF9468_Plag4	34 / 4 .	Phenocryst	53.1551	0.0732	34.9049	0.5158	0.2453	12.5685	3.3241	0.1668	104.954	67.6325
MF9468_Plag4	34 / 5 .	Phenocryst	50.2566	0.0693	31.2715	0.4972	0.1526	14.1813	3.1226	0.1331	99.6841	71.5082
MF9468_Plag4	34 / 6 .	Phenocryst	48.1386	0.0701	29.9208	0.4894	0.1545	14.4119	2.9467	0.128	96.2598	72.9938
MF9468_Plag4	34 / 7 .	Phenocryst	50.182	0.0488	31.472	0.4855	0.1579	14.4384	2.8784	0.1996	99.8627	73.4894
MF9468_Plag4	34 / 8 .	Phenocryst	37.8277	0.1019	33.1114	0.4563	0.1445	12.4157	1.8238	0.093	85.9743	79.0009
MF9468_Plag4	34 / 9 .	Phenocryst	49.6244	0.06	30.8173	0.4652	0.1438	14.2956	3.048	0.1407	98.5951	72.1599
MF9468_Plag4	34 / 10 .	Phenocryst	50.1674	0.0807	30.5797	0.5166	0.1537	14.016	3.291	0.1428	98.9479	70.1813
MF9468_Plag5	35 / 1 .	Microphenocryst	50.2041	0.0583	31.1481	0.4835	0.1544	14.2392	2.9784	0.1301	99.3961	72.5429
MF9468_Plag5	35 / 2 .	Microphenocryst	38.9073	0.0662	23.7253	0.5818	0.198	13.0991	1.9017	0.5097	78.9891	79.1952
MF9468_Plag5	35 / 3 .	Microphenocryst	50.3719	0.073	31.4943	0.5302	0.1657	14.4355	3.0735	0.1209	100.265	72.1881
MF9468_Plag5	35 / 4 .	Microphenocryst	50.4059	0.0799	29.946	0.5225	0.1783	13.7859	3.4677	0.1627	98.5487	68.7207
MF9468_Plag5	35 / 5 .	Microphenocryst	51.5912	0.0976	29.3434	0.6904	0.1397	12.6429	3.8769	0.1913	98.5733	64.3135
MF9468_Plag6	36 / 1 .	Microphenocryst	49.525	0.0659	30.7446	0.5879	0.197	14.2504	2.9882	0.1247	98.4837	72.4931
MF9468_Plag6	36 / 2 .	Microphenocryst	50.2666	0.0677	31.2407	0.5082	0.1508	14.4067	3.0581	0.1144	99.8132	72.2488
MF9468_Plag6	36 / 3 .	Microphenocryst	49.9882	0.0754	30.5817	0.5004	0.1552	14.2572	3.1066	0.1474	98.8121	71.7212
MF9468_Plag6	36 / 4 .	Microphenocryst	50.1893	0.0603	30.5534	0.5189	0.1655	14.0221	3.2574	0.1388	98.9057	70.4047
MF9468_Plag6	36 / 5 .	Microphenocryst	50.7123	0.0787	30.176	0.5952	0.1728	13.6543	3.5197	0.1644	99.0735	68.1922
MF9468_Plag7	37 / 1 .	Phenocryst	49.8674	0.0636	31.0087	0.5027	0.1524	14.2627	2.9742	0.1324	98.9641	72.6038
MF9468_Plag7	37 / 2 .	Phenocryst	49.667	0.0529	31.1676	0.5144	0.1524	14.5558	2.9123	0.1238	99.1461	73.419
MF9468_Plag7	37 / 3 .	Phenocryst	50.0533	0.0634	31.0303	0.5022	0.1421	14.2695	3.0293	0.1442	99.2344	72.2467
MF9468_Plag7	37 / 4 .	Phenocryst	50.3272	0.064	30.9835	0.4874	0.1552	14.2049	3.2293	0.1441	99.5956	70.8531
MF9468_Plag7	37 / 5 .	Phenocryst	49.4708	0.0671	31.0128	0.4958	0.1465	14.6593	2.8849	0.1029	98.8399	73.7405
MF9468_Plag7	37 / 6 .	Phenocryst	49.1207	0.0816	30.9624	0.4982	0.1489	14.3928	2.994	0.1215	98.3201	72.6524
MF9468_Plag7	37 / 7 .	Phenocryst	51.9316	0.0859	29.4042	0.4711	0.1707	12.6278	3.9083	0.1889	98.7884	64.1007
MF9468_Plag7	37 / 8 .	Phenocryst	49.7127	0.054	30.7044	0.4821	0.1556	14.1589	2.9991	0.1447	98.4114	72.2916
MF9468_Plag7	37 / 9 .	Phenocryst	50.0039	0.0632	30.0475	0.4864	0.1537	13.8013	3.3432	0.1599	98.0592	69.5249
MF9468_Plag7	37 / 10 .	Phenocryst	49.9044	0.0774	30.3625	0.542	0.1633	14.0133	3.3182	0.1564	98.5374	70.0047
MF9468_Plag8	38 / 1 .	Phenocryst	49.1294	0.074	29.8884	0.5155	0.218	13.504	3.1486	0.1481	96.626	70.328
MF9468_Plag8	38 / 2 .	Phenocryst	49.1667	0.0763	30.9629	0.4638	0.1587	13.802	2.7222	0.2078	97.5604	73.6976
MF9468_Plag8	38 / 3 .	Phenocryst	50.0263	0.0697	31.1597	0.498	0.1604	14.0594	3.0762	0.154	99.2037	71.6372
MF9468_Plag8	38 / 4 .	Phenocryst	54.3762	0.0577	33.3375	0.4744	0.1674	13.0154	3.045	0.1562	104.63	70.2571
MF9468_Plag8	38 / 5 .	Phenocryst	50.4453	0.0813	30.1025	0.5368	0.1765	13.5652	3.4419	0.1827	98.5321	68.534
MF9468_Plag9	39 / 1 .	Phenocryst	72.5657	0.7323	13.0809	0.6199	0.1594	1.0441	1.3219	5.7976	95.3217	30.3862
MF9468_Plag9	39 / 2 .	Phenocryst	48.3419	0.0637	32.2986	0.5338	0.15	15.0575	2.6179	0.1312	99.1946	76.0686
MF9468_Plag9	39 / 3 .	Phenocryst	45.0824	0.0434	31.535	0.4952	0.1414	16.4295	2.2787	0.0757	96.0813	79.9378
MF9468_Plag9	39 / 4 .	Phenocryst	46.8967	0.0461	33.3904	0.5317	0.1289	16.7062	1.9565	0.0553	99.7117	82.5139
MF9468_Plag9	39 / 5 .	Phenocryst	46.4819	0.0448	33.2113	0.4898	0.1289	16.8792	1.8197	0.0614	99.1169	83.6765
MF9468_Plag9	39 / 6 .	Phenocryst	48.7848	0.0607	32.608	0.5986	0.1028	15.0922	2.1052	0.1075	99.4599	79.8462
MF9468_Plag9	39 / 7 .	Phenocryst	47.6331	0.0636	31.2628	0.5344	0.1747	14.9096	2.8683	0.1223	97.5688	74.1777
MF9468_Plag9	39 / 8 .	Phenocryst	48.4485	0.0475	30.9217	0.5319	0.1726	14.7933	2.778	0.1107	97.8042	74.6377
MF9468_Plag9	39 / 9 .	Phenocryst	49.6692	0.074	30.3252	0.5323	0.178	13.9454	3.3363	0.1637	98.2241	69.7881
MF9468_Plag9	39 / 10 .	Phenocryst	50.4977	0.0719	30.2335	0.5369	0.1715	13.6759	3.3933	0.136	98.7168	69.0139
MF9468_Plag10	40 / 1 .	Micro/Incl (in ol)	49.6523	0.0618	30.8148	0.7538	0.1638	14.1049	3.0757	0.16	98.7872	71.7061
MF9468_Plag10	40 / 2 .	Micro/Incl (in ol)	47.2807	0.0627	32.0122	0.9435	0.1922	14.9732	2.4381	0.0956	97.9982	77.2412
MF9468_Plag11	41 / 1 .	Groundmass	45.7428	0.1126	26.9352	0.9709	0.0862	12.5621	3.0678	0.2501	89.7278	69.3527
MF9468_Plag12	42 / 1 .	Groundmass	52.9692	0.1218	28.644	0.9871	0.0763	11.611	4.5228	0.3319	99.2642	58.6559
MF9468_Plag13	43 / 1 .	Microphenocryst	49.4301	0.0687	30.7762	0.5895	0.1732	14.4941	2.9165	0.1195	98.5679	73.3078
MF9468_Plag13	43 / 2 .	Microphenocryst	49.0323	0.0661	30.657	0.6093	0.1536	14.349	2.9767	0.1347	97.9787	72.7069
MF9468_Plag13	43 / 3 .	Microphenocryst	51.1037	0.1051	29.3809	0.7704	0.1627	12.9543	3.7281	0.1941	98.3992	65.7566
MF9468_Plag14	44 / 1 .	Microphenocryst	50.0489	0.0628	30.8083	0.513	0.1461	14.365	3.0861	0.1572	99.1874	72.0073
MF9468_Plag14	44 / 2 .	Microphenocryst	18.0541	0.1373	28.35	0.4191	0.1507	9.1877	1.0732	0.1032	57.4752	82.5514
MF9468_Plag14	44 / 3 .	Microphenocryst	50.5663	0.074	31.2548	0.5096	0.1677	14.1705	3.3993	0.1562	100.298	69.7312
MF9468_Plag14	44 / 4 .	Microphenocryst	41.7222	0.0706	27.7121	0.4957	0.1164	14.1731	1.8413	0.1441	86.2755	80.9662
MF9468_Plag14	44 / 5 .	Microphenocryst	51.3143	0.0789	29.8466	0.5929	0.1819	13.1454	3.7678	0.1778	99.1054	65.8478
MF9468_Plag15	45 / 1 .	Microphenocryst	50.6374	0.0477	31.2402	0.4529	0.1441	14.1439	3.3015	0.1183	100.086	70.3046
MF9468_Plag15	45 / 2 .	Microphenocryst	49.2909	0.0456	31.8415	0.5018	0.1544	15.106	2.8857	0.1042	99.93	74.3123
MF9468_Plag15	45 / 3 .	Microphenocryst	49.2524	0.0662	31.3584	0.4985	0.1601	14.4614	2.8139	0.1196	98.7305	73.9592
MF9468_Plag15	45 / 4 .	Microphenocryst	50.6515	0.082	30.7241	0.5461	0.167	13.9654	3.1261	0.1367	99.3989	71.1717
MF9468_Plag15	45 / 5 .	Microphenocryst	52.2846	0.1105	29.5961	0.8201	0.1509	12.6227	4.0274	0.1872	99.7996	63.3977
MF9468_Plag16	46 / 1 .	Groundmass	52.4063	0.1093	29.6378	0.8959	0.0973	12.2594	4.1367	0.2492	99.7919	62.0891
MF9468_Plag17	47 / 1 .	Groundmass	54.471	0.1382	28.0134	0.9493	0.0762	10.5477	4.8225	0.3745	99.3927	54.7247
MF9469_Plag1	14 / 1 .	Groundmass	52.0997	0.1074	29.7301	1.0893	0.0447	12.7055	3.9098	0.247	99.9335	64.2329
MF9469_Plag2	15 / 1 .	Groundmass	51.6126	0.0848	30.1007	1.1764	0.0515	13.0417	3.7247	0.2349	100.027	65.9284
MF9469_Plag3	16 / 1 .	Groundmass	49.4471	0.0737	30.761	0.787	0.0631	14.1192	3.2645	0.2163	98.732	70.503
MF9469_Plag4	17 / 1 .	Groundmass	51.3073	0.146	30.5309	0.8269	0.0399	13.239	3.677	0.2357	100.003	66.5524
MF9469_Plag5	18 / 1 .	Groundmass	53.4096	0.1172	28.8255	0.8871	0.0661	11.3923	4.607	0.3132	99.618	57.7446
MF9469_Plag6	19 / 1 .	Microphenocryst	50.4418	0.0871	30.2867	0.5181	0.2006	13.98	3.258	0.1212	98.8934	70.3382
MF9469_Plag6	19 / 2 .	Microphenocryst	34.4343	0.7291	12.9542	5.0917	2.4226	4.8039	1.8369	0.2227	62.4954	59.1045
MF9469_Plag6	19 / 3 .	Microphenocryst	50.7101	0.0882	30.5422	0.5482	0.2005	13.8579	3.3259	0.12	99.3929	69.7211
MF9469_Plag6	19 / 4 .	Microphenocryst	50.6488	0.0689	30.7748	0.6469	0.176	14.0429	3.2789	0.1419	99.779	70.2984
MF9469_Plag6	19 / 5 .	Microphenocryst	48.4442	0.0454	32.0611	0.7164	0.1074	15.1947	2.6047	0.1037	99.2775	76.3248
MF9469_Plag7	20 / 1 .	Groundmass	50.0754	0.0987	30.8091	0.9051	0.0425	14.0516	3.127	0.2036	99.3131	71.2919
MF9469_Plag8	21 / 1 .	Groundmass	55.1396	0.2158	28.5681	0.9276	0.0584	10.4251	4.959	0.3834	100.677	53.7418
MF9469_Plag9	22 / 1 .	Microphenocryst	49.0765	0.9995	3.6175	6.744	14.6011	20.4125	0.235	0	95.6861	97.9593
MF9469_Plag9	22 / 2 .	Microphenocryst	52.6214	1.0366	5.8434	7.0466	14.6459	17.6341	0.2409	0.0102	99.0791	97.5876
MF9469_Plag9	22 / 3 .	Microphenocryst	46.5524	0.1022	29.3035	0.9344	0.0464	13.0581	1.3301	0.2012	91.5284	84.4368
MF9469_Plag9	22 / 4 .	Microphenocryst	51.1102	0.0927	30.9448	0.9729	0.0612	13.601	3.4432	0.2035	100.43	68.5827
MF9469_Plag9	22 / 5 .	Microphenocryst	50.7939	1.0325	1.7889	12.7433	13.9276	18.0288	0.2744	0.0184	98.6079	97.3197
MF9469_Plag10	23 / 1 .	Microphenocryst	51.2146	0.0883	30.7105	0.8459	0.0288	13.3881	3.5502	0.1996	100.026	67.5748
MF9469_Plag10	23 / 2 .	Microphenocryst	60.6887	0.1555	23.2187	0.595	0.0361	4.4923	6.5051	1.4388	97.1302	27.6221
MF9469_Plag10	23 / 3 .	Microphenocryst	51.7569	0.1139	30.1416	0.898	0.0476	12.6993	3.7407	0.2553	99.6533	65.2311
MF9469_Plag10	23 / 4 .	Microphenocryst	52.5736	0.1273	29.5193	0.9531	0.0457	12.1024	4.1476	0.3143	99.7833	61.7231
MF9469_Plag10	23 / 5 .	Microphenocryst	54.6386	0.1365	28.0168	0.9319	0.0499	10.6612	5.0647	0.3795	99.8793	53.7742
MF9469_Plag11	24 / 1 .	Groundmass	52.2927	0.1221	29.338	0.824	0.0634	12.1647	4.2224	0.3159	99.3432	61.4217
MF9469_Plag11	24 / 2 .	Groundmass	53.4125	0.1408	28.6065	0.8193	0.07	11.3252	4.5123	0.341	99.2276	58.1069
MF9469_Plag12	25 / 1 .	Groundmass	51.8615	0.0971	29.167	0.817	0.0592	12.3554	3.9701	0.3028	98.63	63.2334
MF9469_Plag13	26 / 1 .	Groundmass	50.7143	0.081	30.5431	0.8178	0.0551	13.3615	3.5664	0.2249	99.364	67.4313
MF9469_Plag14	27 / 1 .	Microphenocryst	49.8504	0.0758	31.0277	0.5462	0.1399	14.0534	3.1313	0.136	98.9609	71.2663
MF9469_Plag14	27 / 2 .	Microphenocryst	37.2416	0.0993	30.8278	0.4795	0.2482	13.3225	2.7218	0.1109	85.0515	73.0094
MF9469_Plag14	27 / 3 .	Microphenocryst	49.2687	0.0734	31.0389	0.5568	0.1183	14.3959	2.9259	0.1396	98.5175	73.1114
MF9469_Plag14	27 / 4 .	Microphenocryst	52.9135	0.0857	33.137	0.5082	0.2261	13.7605	3.8172	0.1037	104.552	66.5794
MF9469_Plag14	27 / 5 .	Microphenocryst	50.2544	0.075	30.6679	0.4665	0.1749	14.0404	3.2728	0.1044	99.0562	70.3335
MF9469_Plag14	27 / 6 .	Microphenocryst	50.1194	0.0624	30.7014	0.6907	0.1298	14.0677	3.2086	0.1413	99.1212	70.7854
MF9469_Plag15	28 / 1 .	Groundmass	50.847	1.0394	25.1002	4.5552	0.8137	10.8646	3.7554	1.3633	98.3387	61.5207
MF9469_Plag15	28 / 2 .	Groundmass	54.5283	0.126	28.1078	0.9773	0.0505	10.5459	4.9411	0.419	99.6957	54.1179
MF9469_Plag16	29 / 1 .	Groundmass	54.0099	0.1597	28.306	1.1874	0.0378	10.8272	4.6855	0.3402	99.5536	56.0829
MF9469_Plag17	30 / 1 .	Groundmass	75.2233	1.9694	9.8565	1.3393	0.1316	0.46	1.0562	5.0956	95.1317	19.3993
MF9469_Plag17	30 / 2 .	Groundmass	51.5147	0.099	29.8058	0.9793	0.0474	12.8696	3.6484	0.237	99.2012	66.0947
MF9472_plag1	1 / 1 .	Microphenocryst	50.2894	0.0562	30.757	0.6957	0.1471	13.7121	3.2465	0.1295	99.0336	70.0072
MF9472_plag1	1 / 2 .	Microphenocryst	50.5697	0.069	30.6594	0.7264	0.1251	13.6163	3.2259	0.1586	99.1502	69.9936
MF9472_plag1	1 / 3 .	Microphenocryst	50.0451	0.0773	31.0046	0.7357	0.1031	13.94	3.1653	0.2411	99.3123	70.8777
MF9472_plag1	1 / 4 .	Microphenocryst	50.3646	0.0698	31.0173	0.6614	0.1174	13.8417	3.0831	0.1824	99.3377	71.2732
MF9472_plag2	2 / 1 .	Microphenocryst	51.019	0.1048	29.8871	0.9687	0.1455	13.0269	3.5966	0.1727	98.9213	66.6849
MF9472_plag2	2 / 2 .	Microphenocryst	52.0338	0.2	29.0322	0.9259	0.0912	11.9691	4.0798	0.2957	98.6276	61.8508
MF9472_plag3	3 / 1 .	Microphenocryst	49.7842	0.0693	30.5001	0.7744	0.0948	13.8532	3.2646	0.1464	98.4869	70.1053
MF9472_plag3	3 / 2 .	Microphenocryst	51.5017	0.1027	29.3175	0.8879	0.1202	12.4834	3.7524	0.2819	98.4477	64.77
MF9472_plag3	3 / 3 .	Microphenocryst	52.862	0.1104	28.8681	0.83	0.1025	11.841	4.2696	0.2403	99.1239	60.5154
MF9472_plag4	4 / 1 .	Groundmass	50.8403	0.083	29.9342	0.8555	0.0825	12.9073	3.644	0.21	98.5567	66.1872
MF9472_plag4	4 / 2 .	Groundmass	56.9349	0.1533	25.5864	1.129	0.0638	8.0072	5.9615	0.6157	98.4517	42.6036
MF9472_plag5	5 / 1 .	Groundmass	51.6243	0.1013	29.2125	1.1058	0.1616	12.3024	3.8638	0.2425	98.6142	63.7628
MF9472_plag5	5 / 2 .	Groundmass	51.7074	0.0938	29.3346	0.9222	0.0803	12.2154	3.9281	0.2179	98.4997	63.2157
MF9472_plag6	6 / 1 .	Microphenocryst	51.1334	0.0689	30.2917	0.5185	0.1579	13.3238	3.4743	0.1522	99.1206	67.9418
MF9472_plag6	6 / 2 .	Microphenocryst	50.974	0.0932	29.7643	0.8631	0.202	12.992	3.4821	0.2496	98.6203	67.3407
MF9472_plag6	6 / 3 .	Microphenocryst	51.6075	0.0805	30.4032	0.9126	0.077	13.0298	3.6434	0.1876	99.9415	66.402
MF9472_plag7	7 / 1 .	Groundmass	50.6492	0.7138	15.6514	6.6233	7.0502	15.2097	2.0086	0.1698	98.076	80.7125
MF9472_plag7	7 / 2 .	Groundmass	50.2012	0.9478	3.0085	7.8402	15.0003	19.9365	0.2684	0.0108	97.2138	97.6218
MF9472_plag8	8 / 1 .	Microphenocryst	52.1747	0.0879	28.6344	0.8012	0.067	11.7651	4.1692	0.3582	98.0579	60.9296
MF9472_plag8	8 / 2 .	Microphenocryst	50.1674	0.0664	30.0749	0.7136	0.1085	13.388	3.3267	0.2149	98.0603	68.9828
MF9472_plag8	8 / 3 .	Microphenocryst	52.1893	0.0948	29.1142	0.6601	0.2016	12.1796	4.044	0.1724	98.6561	62.4682
MF9472_plag9	9 / 1 .	Microphenocryst	50.1287	0.0782	30.5573	0.5803	0.1631	13.5789	3.2126	0.1173	98.4164	70.0226
MF9472_plag9	9 / 2 .	Microphenocryst	49.6021	0.0685	30.6305	0.6146	0.1586	14.0027	3.044	0.127	98.2481	71.7687
MF9472_plag9	9 / 3 .	Microphenocryst	50.5372	0.0813	30.4492	0.6929	0.1372	13.5388	3.3303	0.1455	98.9123	69.1989
MF9472_plag10	10 / 1 .	Microphenocryst	49.4084	0.0712	30.5575	0.5597	0.1636	14.2641	3.0364	0.1134	98.1743	72.1921
MF9472_plag10	10 / 2 .	Microphenocryst	49.2309	0.0448	30.8151	0.5473	0.1692	14.1187	3.022	0.1238	98.0716	72.0817
MF9472_plag10	10 / 3 .	Microphenocryst	49.9857	0.081	30.44	0.8032	0.1062	13.4947	3.3811	0.1376	98.4294	68.8053
MF9472_plag11	11 / 1 .	Microphenocryst	50.8161	0.0454	30.1535	0.6781	0.089	13.2747	3.4761	0.1644	98.6972	67.85
MF9472_plag11	11 / 2 .	Microphenocryst	50.2077	0.0499	30.1142	0.7266	0.0878	13.396	3.4144	0.217	98.2136	68.4362
MF9472_plag11	11 / 3 .	Microphenocryst	53.064	0.1087	28.4148	0.9014	0.0612	11.3757	4.3401	0.4662	98.7321	59.1585
MF9472_plag12	12 / 1 .	Groundmass	53.3148	0.122	28.3749	0.9481	0.1008	10.9792	4.5868	0.3318	98.7585	56.9487
MF9472_plag12	12 / 2 .	Groundmass	52.3311	0.1143	29.0448	1.0203	0.0677	11.9764	4.0558	0.2604	98.8707	62.0043
MF9472_plag13	13 / 1 .	Microphenocryst	49.76	0.0681	30.8575	0.5147	0.1835	14.1545	3.0035	0.1098	98.6517	72.2559
MF9472_plag13	13 / 2 .	Microphenocryst	50.2374	0.0593	30.7694	0.4764	0.1898	14.0408	2.9894	0.2449	99.0074	72.1885
MF9472_plag13	13 / 3 .	Microphenocryst	49.4965	0.0481	31.1635	0.6373	0.1334	14.3376	2.9613	0.1229	98.9005	72.794
MF9472_plag14	14 / 1 .	Groundmass	49.3123	0.0785	30.7372	0.7848	0.0896	13.8802	3.148	0.1497	98.1803	70.9021
MF9472_plag14	14 / 2 .	Groundmass	49.4016	0.0546	30.8969	0.7628	0.1167	14.3629	2.9494	0.1464	98.6914	72.9085
MF9472_plag15	15 / 1 .	Groundmass	50.2409	0.0358	30.696	0.7353	0.1169	13.8446	3.0699	0.2863	99.0259	71.3652
MF9472_plag15	15 / 2 .	Groundmass	49.9278	0.061	30.5905	0.5815	0.1206	13.713	3.2591	0.1396	98.3932	69.9272
MF9472_plag16	16 / 1 .	Microphenocryst	49.8266	0.0771	31.1316	0.5659	0.1853	14.1955	2.9071	0.1045	98.9935	72.9622
MF9472_plag16	16 / 2 .	Microphenocryst	49.4209	0.0696	30.4622	0.4941	0.1907	14.0902	3.124	0.1141	97.9659	71.3676
MF9472_plag16	16 / 3 .	Microphenocryst	49.1574	0.069	31.1359	0.5017	0.1661	14.4628	3.0037	0.1095	98.606	72.6845
MF9472_plag17	17 / 1 .	Microphenocryst	49.0603	0.0713	30.1609	0.5901	0.1474	13.79	3.2773	0.1383	97.2357	69.9278
MF9472_plag17	17 / 2 .	Microphenocryst	50.364	0.045	30.3175	0.5484	0.154	13.5917	3.2252	0.1453	98.3909	69.9602
MF9472_plag17	17 / 3 .	Microphenocryst	50.2098	0.0677	30.2125	0.807	0.1289	13.3158	3.4352	0.1774	98.3544	68.1748
MF9472_plag18	18 / 1 .	Groundmass	50.3893	0.0541	30.1828	0.594	0.1477	13.4628	3.453	0.1508	98.4345	68.3007
MF9472_plag18	18 / 2 .	Groundmass	50.2326	0.0874	30.2894	0.7182	0.1117	13.4447	3.4113	0.1471	98.4423	68.5342
MF9472_plag18	18 / 3 .	Groundmass	50.8829	0.062	29.9904	0.6323	0.1726	13.3189	3.218	0.4296	98.7068	69.5797
MF9472_plag19	19 / 1 .	Microphenocryst	50.366	0.0554	30.0258	0.6032	0.2056	13.3804	3.3711	0.1381	98.1456	68.6862
MF9472_plag19	19 / 2 .	Microphenocryst	49.1603	0.0587	30.3593	0.54	0.1584	14.1016	2.9754	0.1102	97.4638	72.3692
MF9472_plag19	19 / 3 .	Microphenocryst	52.1533	0.0818	29.1055	0.8646	0.2034	12.4527	3.9238	0.1948	98.98	63.6873
MF9472_plag20	20 / 1 .	Groundmass	50.0181	0.055	30.3367	0.7829	0.1032	13.626	3.1487	0.2203	98.2908	70.5147
MF9472_plag20	20 / 2 .	Groundmass	51.1103	0.1941	26.9345	1.7789	1.2187	12.8003	3.6593	0.2151	97.9111	65.9066
MF9472_plag20	20 / 3 .	Groundmass	54.0024	0.1009	27.5128	0.7979	0.0735	10.4636	4.8494	0.393	98.1936	54.3883
MF9472_plag21	21 / 1 .	Microphenocryst	51.9242	0.0566	29.8858	0.5439	0.1715	12.8402	3.7092	0.1616	99.2931	65.6718
MF9472_plag21	21 / 2 .	Microphenocryst	50.8622	0.0475	29.8827	0.6027	0.1697	12.9263	3.4628	0.1852	98.1391	67.3515
MF9472_plag21	21 / 3 .	Microphenocryst	51.1551	0.0375	29.7292	0.5013	0.1663	12.7484	3.653	0.1584	98.1492	65.854
MF9472_plag21	21 / 4 .	Microphenocryst	50.5036	0.0865	29.8396	0.7345	0.1232	12.8624	3.5662	0.177	97.893	66.5911
MF9472_plag22	22 / 1 .	Groundmass	50.535	0.0843	29.8823	0.8318	0.0983	13.0309	3.5068	0.1882	98.1576	67.251
MF9472_plag22	22 / 2 .	Groundmass	52.763	0.1343	28.3393	0.8131	0.0745	11.439	4.3004	0.2951	98.1586	59.5141
MF9472_plag23	23 / 1 .	Groundmass	50.6404	0.1068	29.2547	0.9638	0.0827	12.6861	3.8382	0.2322	97.8051	64.6215
MF9472_plag23	23 / 2 .	Groundmass	51.4119	0.0702	29.1514	1.0031	0.1112	12.2816	3.9582	0.2183	98.2057	63.1638
MF9472_plag24	24 / 1 .	Groundmass	50.6485	0.0865	29.6541	0.8049	0.1245	13.2049	3.4682	0.1965	98.188	67.7846
MF9472_plag24	24 / 2 .	Groundmass	50.4885	0.0841	29.7682	0.9153	0.0894	12.7855	3.6941	0.232	98.0571	65.6675
JS19_plag1	45 / 1 .	Microphenocryst	50.3868	0.0773	30.7992	0.5417	0.1282	13.8426	3.3078	0.1713	99.2549	69.8129
JS19_plag1	45 / 2 .	Microphenocryst	49.825	0.0839	30.7468	0.5816	0.1318	13.6799	3.1551	0.1537	98.358	70.5545
JS19_plag1	45 / 3 .	Microphenocryst	50.2312	0.0681	30.4268	0.501	0.1251	13.5316	3.4188	0.1913	98.494	68.6257
JS19_plag1	45 / 4 .	Microphenocryst	51.0761	0.0599	30.8052	0.5039	0.1336	13.4197	3.4589	0.1862	99.6435	68.1942
JS19_plag1	45 / 5 .	Microphenocryst	51.3999	0.0685	30.4036	0.5409	0.1389	13.2065	3.6276	0.1904	99.5764	66.7983
JS19_plag1	45 / 6 .	Microphenocryst	51.8963	0.0719	30.4568	0.5125	0.1239	13.0505	3.6611	0.2098	99.9828	66.3293
JS19_plag1	45 / 7 .	Microphenocryst	51.5461	0.0807	30.2876	0.6424	0.1497	13.1251	3.7682	0.1961	99.796	65.8107
JS19_plag1	45 / 8 .	Microphenocryst	51.5984	0.0877	30.3524	0.669	0.1394	13.0879	3.6417	0.2254	99.8017	66.5116
JS19_plag1	45 / 9 .	Microphenocryst	51.8073	0.0899	30.0095	0.6823	0.1435	12.9972	3.7842	0.2468	99.7607	65.4943
JS19_plag1	45 / 10 .	Microphenocryst	51.9341	0.1008	29.5362	0.798	0.1344	12.3368	4.0547	0.2657	99.1608	62.7066
JS19_plag2	46 / 1 .	Microphenocryst	52.7256	0.0859	29.6919	0.5739	0.1413	12.2271	4.0538	0.2221	99.7216	62.5027
JS19_plag2	46 / 2 .	Microphenocryst	51.9486	0.0723	30.2274	0.4998	0.1332	12.884	3.7651	0.2028	99.7331	65.4109
JS19_plag2	46 / 3 .	Microphenocryst	51.4378	0.0598	30.3628	0.5198	0.1335	13.1659	3.6295	0.2185	99.5277	66.7184
JS19_plag2	46 / 4 .	Microphenocryst	52.1984	0.0727	29.9358	0.5891	0.1384	12.6836	3.9032	0.2234	99.7446	64.2321
JS19_plag2	46 / 5 .	Microphenocryst	52.0859	0.0599	29.9515	0.5568	0.1351	12.7042	3.7643	0.2064	99.4641	65.0971
JS19_plag2	46 / 6 .	Microphenocryst	50.9549	0.0521	30.2553	0.4854	0.1213	13.3186	3.4317	0.1914	98.8108	68.2014
JS19_plag2	46 / 7 .	Microphenocryst	51.9781	0.0966	29.9795	0.6318	0.137	13.0305	3.6323	0.2261	99.7118	66.4712
JS19_plag2	46 / 8 .	Microphenocryst	52.2766	0.0886	29.6787	0.6014	0.1365	12.326	3.994	0.2623	99.3643	63.0382
JS19_plag2	46 / 9 .	Microphenocryst	52.4619	0.0848	29.7235	0.6176	0.1352	12.6252	3.8687	0.2301	99.747	64.33
JS19_plag2	46 / 10 .	Microphenocryst	51.6883	0.0985	29.6578	0.6431	0.1328	12.5038	3.9226	0.2635	98.9105	63.789
JS19_plag3	47 / 1 .	Phenocryst	51.6471	0.0944	29.8034	0.6393	0.1267	12.7326	3.8206	0.2162	99.0803	64.81
JS19_plag3	47 / 2 .	Phenocryst	51.5568	0.0719	30.0385	0.5567	0.1284	12.8163	3.6681	0.2358	99.0725	65.8807
JS19_plag3	47 / 3 .	Phenocryst	51.6988	0.071	29.716	0.6507	0.1239	12.7295	3.8204	0.2402	99.0505	64.8056
JS19_plag3	47 / 4 .	Phenocryst	51.9728	0.0842	29.9819	0.5378	0.1188	12.7814	3.8532	0.244	99.5739	64.7034
JS19_plag3	47 / 5 .	Phenocryst	52.8135	0.0903	29.5172	0.7647	0.1266	12.274	4.0244	0.2497	99.8603	62.7626
JS19_plag4	48 / 1 .	Phenocryst	51.8603	0.0967	29.6393	0.6187	0.1229	12.4887	3.9448	0.2287	99	63.6306
JS19_plag4	48 / 2 .	Phenocryst	52.0873	0.0884	29.6882	0.654	0.1285	12.3805	3.9077	0.2447	99.1793	63.6479
JS19_plag4	48 / 3 .	Phenocryst	52.1181	0.098	29.4771	0.6131	0.1296	12.0751	4.1406	0.25	98.9015	61.7097
JS19_plag4	48 / 4 .	Phenocryst	52.6718	0.0939	29.4118	0.676	0.1216	12.048	3.9966	0.2343	99.254	62.4899
JS19_plag4	48 / 5 .	Phenocryst	53.2867	0.1226	28.7176	0.8234	0.1161	11.368	4.522	0.3016	99.258	58.1464
JS19_plag5	49 / 1 .	Megaphenocryst	52.2854	0.081	28.8741	0.5652	0.1266	11.9353	4.0519	0.251	98.1705	61.9459
JS19_plag5	49 / 2 .	Megaphenocryst	51.6081	0.1132	29.8313	0.6479	0.1336	12.6649	3.7293	0.221	98.9495	65.2388
JS19_plag5	49 / 3 .	Megaphenocryst	52.1997	0.0869	29.4323	0.6242	0.1319	12.3221	3.7609	0.2355	98.7935	64.4208
JS19_plag5	49 / 4 .	Megaphenocryst	52.9349	0.1009	29.2854	0.6147	0.123	12.039	4.1523	0.275	99.5252	61.5722
JS19_plag5	49 / 5 .	Megaphenocryst	51.5225	0.1055	29.335	0.5995	0.1293	12.2312	3.8736	0.2476	98.0442	63.5699
JS19_plag5	49 / 6 .	Megaphenocryst	51.6721	0.0948	29.342	0.6615	0.1407	12.3985	3.7899	0.2508	98.3502	64.3864
JS19_plag5	49 / 7 .	Megaphenocryst	51.8946	0.1005	29.3209	0.6794	0.1331	12.0124	4.0611	0.2668	98.4689	62.0442
JS19_plag5	49 / 8 .	Megaphenocryst	52.5801	0.1121	28.4271	0.8004	0.12	11.3658	4.3973	0.3463	98.1491	58.8207
JS19_plag6	50 / 1 .	Phenocryst	52.1638	0.0798	28.9075	0.65	0.1224	11.9256	4.0858	0.2573	98.1921	61.7301
JS19_plag6	50 / 2 .	Phenocryst	51.7077	0.0891	30.0259	0.6699	0.1308	12.7497	3.8183	0.2321	99.4233	64.8543
JS19_plag6	50 / 3 .	Phenocryst	51.5014	0.1211	29.4621	0.6271	0.1303	12.4762	3.6172	0.2355	98.1708	65.5897
JS19_plag6	50 / 4 .	Phenocryst	52.6246	0.1063	29.4221	0.7043	0.1286	12.33	4.0161	0.2486	99.5806	62.9171
JS19_plag7	51 / 1 .	Groundmass	53.2101	0.1336	28.8212	0.9347	0.1056	11.4893	4.335	0.3228	99.3525	59.4267
JS19_plag7	51 / 2 .	Groundmass	53.5669	0.1288	28.9593	0.8832	0.0637	11.6601	4.278	0.4478	99.9877	60.0998
JS19_plag8	52 / 1 .	Groundmass	53.8122	0.1189	28.8015	0.9319	0.1073	11.2872	4.4558	0.2973	99.812	58.3316
JS19_plag8	52 / 2 .	Groundmass	53.6581	0.1208	28.6666	0.8062	0.1086	11.1908	4.5699	0.3695	99.4905	57.5063
JS19_plag9	53 / 1 .	Groundmass	66.2729	0.3139	18.3948	0.6297	0.0176	0.6107	5.5804	6.8288	98.6486	5.70292
JS19_plag9	53 / 2 .	Groundmass	53.7982	0.1514	28.3163	1.1319	0.0786	10.7585	4.7059	0.3422	99.2828	55.819
JS19_plag10	54 / 1 .	Microphenocryst	52.2533	0.0988	30.5383	0.7161	0.1361	12.9878	3.6189	0.2294	100.579	66.4805
JS19_plag10	54 / 2 .	Microphenocryst	51.7539	0.1042	29.7518	0.8348	0.1623	12.6346	3.8261	0.2482	99.3159	64.6007
JS19_plag10	54 / 3 .	Microphenocryst	52.0949	0.0925	30.1473	0.7304	0.1438	12.8121	3.8996	0.233	100.154	64.4845
JS19_plag11	55 / 1 .	Microphenocryst	53.0326	0.0684	29.0442	0.6848	0.1297	11.7678	4.2242	0.3057	99.2573	60.6226
JS19_plag11	55 / 2 .	Microphenocryst	54.0052	0.048	28.5102	0.6659	0.1359	11.2744	4.592	0.325	99.5567	57.5703
JS19_plag11	55 / 3 .	Microphenocryst	52.1164	0.0929	29.4194	0.6657	0.1327	12.2075	4.0769	0.2534	98.965	62.3317
JS19_plag12	56 / 1 .	Phenocryst	0.0201	0.0083	0.0103	0.037	0	0.0189	0	0	0.0947	100
JS19_plag12	56 / 2 .	Phenocryst	52.8999	0.0514	28.8542	0.6565	0.1418	11.7662	4.3369	0.3067	99.0137	59.9891
JS19_plag12	56 / 3 .	Phenocryst	52.2065	0.0866	29.4549	0.7509	0.1518	12.3822	3.9814	0.2365	99.2507	63.2176
JS19_plag12	56 / 4 .	Phenocryst	53.8073	0.1365	28.2496	0.7073	0.1184	11.2508	4.6215	0.3433	99.2346	57.3626
JS19_plag13	57 / 1 .	Phenocryst	52.1655	0.0857	29.2877	0.5566	0.1481	12.2432	3.9555	0.2486	98.691	63.1068
JS19_plag13	57 / 2 .	Phenocryst	52.176	0.0755	29.514	0.6332	0.1332	12.2756	3.9606	0.2649	99.033	63.1384
JS19_plag13	57 / 3 .	Phenocryst	52.5563	0.0929	29.4621	0.7109	0.1564	12.3234	3.98	0.254	99.536	63.1151
JS19_plag13	57 / 4 .	Phenocryst	52.6506	0.0773	29.1452	0.6181	0.1356	12.0262	4.0617	0.2891	99.0038	62.0677
JS19_plag13	57 / 5 .	Phenocryst	54.3834	0.1214	28.3828	0.6815	0.1123	10.8634	4.7468	0.3458	99.6374	55.8448
JS19_plag14	58 / 1 .	Phenocryst	52.6102	0.0849	29.1742	0.628	0.1275	12.0534	4.235	0.2547	99.1677	61.1329
JS19_plag14	58 / 2 .	Phenocryst	51.8974	0.0925	29.8369	0.6603	0.1442	12.1093	4.0288	0.2235	98.9929	62.4207
JS19_plag14	58 / 3 .	Phenocryst	53.0804	0.1107	29.3569	0.6299	0.1285	11.9658	4.1927	0.2744	99.7393	61.1981
JS19_plag14	58 / 4 .	Phenocryst	53.0464	0.1261	28.7511	0.83	0.118	11.4342	4.4885	0.2933	99.0875	58.4683
JS19_plag15	59 / 1 .	Microphenocryst	51.654	0.0779	29.9319	0.6386	0.1245	12.7543	3.7624	0.2338	99.1772	65.1979
JS19_plag15	59 / 2 .	Microphenocryst	52.2129	0.0879	29.6546	0.6081	0.1351	12.2441	3.9634	0.2625	99.1686	63.0621
JS19_plag15	59 / 3 .	Microphenocryst	51.0521	0.0842	30.1997	0.6519	0.1305	12.9059	3.6529	0.1996	98.8767	66.1302
JS19_plag15	59 / 4 .	Microphenocryst	51.0986	0.1071	29.7247	0.7414	0.1189	12.724	3.7201	0.2328	98.4675	65.4002
JS19_plag16	60 / 1 .	Megaphenocryst	51.8579	0.1028	29.4701	0.6502	0.1371	12.519	3.8999	0.2309	98.868	63.9509
JS19_plag16	60 / 2 .	Megaphenocryst	51.9459	0.0953	29.8673	0.6617	0.139	12.6539	3.7765	0.2186	99.3581	64.9333
JS19_plag16	60 / 3 .	Megaphenocryst	52.2868	0.0803	29.9413	0.6464	0.1391	12.6834	3.8512	0.2326	99.8609	64.5393
JS19_plag16	60 / 4 .	Megaphenocryst	52.0498	0.081	29.9517	0.6751	0.1326	12.6678	3.7694	0.2318	99.5591	65.0011
JS19_plag16	60 / 5 .	Megaphenocryst	52.3756	0.0876	29.7497	0.6274	0.1384	12.4116	3.953	0.2234	99.5666	63.439
JS22_Plag1	1 / 1 .	Megaphenocryst	51.3164	0.0715	30.6553	0.4772	0.1725	13.6174	3.4062	0.1428	99.8593	68.8409
JS22_Plag1	1 / 2 .	Megaphenocryst	52.157	0.0692	30.1227	0.48	0.1975	12.945	3.7673	0.174	99.9126	65.5045
JS22_Plag1	1 / 3 .	Megaphenocryst	48.0838	0.0648	31.5687	0.4656	0.2306	13.2912	3.7925	0.1336	97.6309	65.9488
JS22_Plag1	1 / 4 .	Megaphenocryst	52.2147	0.0671	30.0724	0.4339	0.1728	13.3734	3.6272	0.1657	100.127	67.0787
JS22_Plag1	1 / 5 .	Megaphenocryst	52.5609	0.0718	32.0133	0.4807	0.1618	13.969	3.1989	0.124	102.581	70.7024
JS22_Plag1	1 / 6 .	Megaphenocryst	51.5286	0.053	30.4108	0.4655	0.1656	13.5989	3.4375	0.1465	99.8065	68.615
JS22_Plag1	1 / 7 .	Megaphenocryst	54.8912	0.4436	17.4636	3.5705	2.7201	4.9918	3.9559	0.5997	88.6364	41.0845
JS22_Plag1	1 / 8 .	Megaphenocryst	49.8149	0.089	29.1399	0.4774	0.1668	12.7313	3.2376	0.1861	95.8428	68.4854
JS22_Plag1	1 / 9 .	Megaphenocryst	53.3156	0.0593	29.7893	0.4403	0.1745	12.3972	4.0716	0.1913	100.439	62.7235
JS22_Plag1	1 / 10 .	Megaphenocryst	53.4883	0.065	29.3808	0.4613	0.1742	12.3935	4.0338	0.1853	100.182	62.9344
JS22_Plag2	2 / 1 .	Phenocryst	50.3087	0.0669	30.3863	0.4884	0.1757	14.1194	3.1932	0.1306	98.8691	70.9605
JS22_Plag2	2 / 2 .	Phenocryst	49.6485	0.0652	30.62	0.4915	0.1736	14.2909	3.0007	0.1441	98.4346	72.4664
JS22_Plag2	2 / 3 .	Phenocryst	49.7844	0.0849	30.4421	0.4519	0.1762	13.8944	3.2136	0.1219	98.1694	70.4961
JS22_Plag2	2 / 4 .	Phenocryst	22.4927	0.1102	6.9066	0.4449	1.9401	2.7756	0.248	0.2713	35.1894	86.0822
JS22_Plag2	2 / 5 .	Phenocryst	48.4219	0.0479	31.448	0.4166	0.1685	15.3691	2.5646	0.0898	98.5262	76.8079
JS22_Plag2	2 / 6 .	Phenocryst	49.1904	0.0581	31.089	0.4274	0.1728	14.7651	2.8688	0.0718	98.6434	73.9874
JS22_Plag2	2 / 7 .	Phenocryst	48.8447	0.0458	31.1256	0.4546	0.167	15.0087	2.7568	0.1018	98.505	75.0541
JS22_Plag2	2 / 8 .	Phenocryst	49.3197	0.0474	30.6132	0.417	0.1706	14.6151	3.0397	0.0891	98.3118	72.6559
JS22_Plag2	2 / 9 .	Phenocryst	48.7649	0.0655	31.2257	0.473	0.1671	15.0609	2.7301	0.0759	98.5632	75.3005
JS22_Plag2	2 / 10 .	Phenocryst	48.1478	0.0633	31.5623	0.5313	0.1649	15.4185	2.4874	0.0737	98.4491	77.4041
JS22_Plag3	3 / 1 .	Phenocryst	49.8834	0.0696	31.1885	0.4454	0.1784	14.6317	2.862	0.1167	99.3757	73.8581
JS22_Plag3	3 / 2 .	Phenocryst	48.813	0.052	31.7667	0.4747	0.1685	15.1443	2.7413	0.0799	99.2404	75.327
JS22_Plag3	3 / 3 .	Phenocryst	45.1088	0.0576	27.573	0.4203	0.3736	12.8708	2.5615	0.1641	89.1297	73.5227
JS22_Plag3	3 / 4 .	Phenocryst	49.6974	0.0587	31.3412	0.4242	0.169	14.5295	2.9734	0.0944	99.2877	72.9762
JS22_Plag3	3 / 5 .	Phenocryst	49.38	0.0681	31.1762	0.4057	0.1666	14.5979	2.9313	0.0887	98.8143	73.3484
JS22_Plag3	3 / 6 .	Phenocryst	48.9875	0.0638	31.3191	0.4461	0.1772	14.9491	2.7602	0.0815	98.7845	74.9564
JS22_Plag3	3 / 7 .	Phenocryst	48.4276	0.0581	31.9967	0.4823	0.166	15.3787	2.4808	0.0779	99.0681	77.4053
JS22_Plag3	3 / 8 .	Phenocryst	50.246	0.0583	30.2192	0.4994	0.1719	13.7235	3.3643	0.1197	98.4022	69.2712
JS22_Plag3	3 / 9 .	Phenocryst	48.9776	0.0722	31.6204	0.4951	0.1616	14.9558	2.7112	0.0986	99.0924	75.2994
JS22_Plag3	3 / 10 .	Phenocryst	48.3552	0.0564	31.8814	0.4417	0.1554	15.4201	2.6157	0.0895	99.0154	76.5142
JS22_Plag4	4 / 1 .	Microphenocryst	46.4942	0.0643	30.1181	0.5009	0.199	14.4805	2.4944	0.1947	94.546	76.2366
JS22_Plag4	4 / 2 .	Microphenocryst	48.0711	0.073	29.9258	0.6224	0.2404	13.9908	2.959	0.143	96.0255	72.3219
JS22_Plag4	4 / 3 .	Microphenocryst	56.6024	0.1337	25.9355	0.6681	0.0681	8.5016	5.9881	0.4278	98.3254	43.965
JS22_Plag5	5 / 1 .	Groundmass	49.5762	0.0845	30.425	0.6232	0.1849	13.9702	3.267	0.1171	98.2482	70.2659
JS22_Plag6	6 / 1 .	Groundmass	52.4805	0.1265	29.23	0.98	0.1447	12.367	4.0579	0.1759	99.5623	62.7453
JS22_Plag7	7 / 1 .	Groundmass	50.7173	0.1025	30.7674	0.597	0.1782	13.983	3.3202	0.1101	99.7756	69.9466
JS22_Plag8	8 / 1 .	Groundmass	51.1712	0.0877	28.8939	0.7541	0.1515	12.5317	4.1196	0.1529	97.8626	62.7018
JS22_Plag9	9 / 1 .	Phenocryst	48.918	0.0565	31.8096	0.5596	0.1776	15.4449	2.6524	0.0655	99.6841	76.292
JS22_Plag9	9 / 2 .	Phenocryst	49.3927	0.0677	31.9567	0.5179	0.1601	15.161	2.7838	0.0929	100.133	75.0606
JS22_Plag9	9 / 3 .	Phenocryst	49.2661	0.069	31.715	0.4987	0.1637	14.995	2.7839	0.0823	99.5737	74.8533
JS22_Plag9	9 / 4 .	Phenocryst	48.4013	0.0669	30.894	0.514	0.1748	14.4831	2.9304	0.0997	97.5641	73.1998
JS22_Plag9	9 / 5 .	Phenocryst	57.2502	0.1127	25.7745	0.6234	0.0769	8.2252	6.2693	0.4572	98.7894	42.0305
JS22_Plag10	10 / 1 .	Phenocryst	48.4067	0.0588	31.8882	0.4827	0.1547	15.3782	2.6276	0.0634	99.0601	76.3835
JS22_Plag10	10 / 2 .	Phenocryst	48.7434	0.0594	31.6534	0.4701	0.1535	15.3313	2.4916	0.0802	98.983	77.2751
JS22_Plag10	10 / 3 .	Phenocryst	49.5854	0.0746	30.7812	0.5412	0.2051	14.3976	3.0798	0.1032	98.7683	72.0941
JS22_Plag10	10 / 4 .	Phenocryst	48.6661	0.0724	30.8541	0.525	0.1694	14.7473	2.8857	0.0976	98.0176	73.8509
JS22_Plag10	10 / 5 .	Phenocryst	52.1058	0.1169	29.0688	0.7466	0.1414	12.394	4.1001	0.1937	98.8674	62.5542
JS22_Plag11	11 / 1 .	Groundmass	50.5539	0.0939	30.295	0.612	0.1809	13.8077	3.3123	0.1248	98.9804	69.731
JS22_Plag12	12 / 1 .	Groundmass	51.0069	0.0816	29.8376	0.6792	0.155	13.2044	3.5067	0.1256	98.5968	67.5422
JS22_Plag13	13 / 1 .	Groundmass	48.7725	0.0763	30.4692	0.6024	0.1643	14.5637	2.8082	0.1049	97.5614	74.1337
JS23_plag1	61 / 1 .	Phenocryst	50.0904	0.0556	31.1623	0.4831	0.1302	14.0646	3.1731	0.1428	99.302	71.0104
JS23_plag1	61 / 2 .	Phenocryst	49.0708	0.0484	32.3107	0.4868	0.1222	15.2197	2.6915	0.0922	100.042	75.7575
JS23_plag1	61 / 3 .	Phenocryst	50.086	0.0761	32.0995	0.4821	0.1165	14.791	2.8441	0.0979	100.593	74.187
JS23_plag1	61 / 4 .	Phenocryst	49.799	0.0567	31.6084	0.4888	0.1282	14.4111	3.0042	0.1057	99.602	72.61
JS23_plag1	61 / 5 .	Phenocryst	49.6096	0.0762	31.2255	0.5789	0.2973	13.8487	3.0586	0.2002	98.895	71.4466
JS23_plag1	61 / 6 .	Phenocryst	50.6334	0.042	30.7837	0.5015	0.5133	12.5766	3.5808	0.1474	98.7788	65.9977
JS23_plag1	61 / 7 .	Phenocryst	51.0769	0.0857	31.1906	0.5502	0.1102	13.8321	3.294	0.1462	100.286	69.885
JS23_plag2	62 / 1 .	Microphenocryst	50.8348	0.0997	30.84	0.5567	0.1392	13.6272	3.4392	0.1385	99.6752	68.6492
JS23_plag2	62 / 2 .	Microphenocryst	51.2622	0.0876	30.3838	0.6099	0.1703	13.4378	3.5552	0.1408	99.6475	67.6252
JS23_plag2	62 / 3 .	Microphenocryst	50.6383	0.0812	31.3197	0.5965	0.1587	14.0832	3.242	0.1297	100.249	70.5937
JS23_plag3	63 / 1 .	Microphenocryst	50.6145	0.0948	31.3608	0.5568	0.1372	14.3315	3.2013	0.1241	100.421	71.2149
JS23_plag3	63 / 2 .	Microphenocryst	50.7817	0.1011	31.0107	0.6082	0.1624	13.7629	3.397	0.1285	99.9524	69.1261
JS23_plag3	63 / 3 .	Microphenocryst	50.6419	0.0728	31.0532	0.5948	0.1393	14.0233	3.4342	0.1419	100.102	69.2935
JS23_plag3	63 / 4 .	Microphenocryst	53.544	0.1295	27.8922	0.8027	0.1233	10.9936	4.898	0.2979	98.6813	55.3649
JS23_plag4	64 / 1 .	Microphenocryst	49.6309	0.0677	30.7407	0.5002	0.1436	13.9213	3.2907	0.1328	98.4279	70.0412
JS23_plag4	64 / 2 .	Microphenocryst	50.489	0.0745	31.0231	0.5202	0.1323	14.0223	3.3133	0.1162	99.6909	70.0492
JS23_plag4	64 / 3 .	Microphenocryst	50.456	0.0517	30.4287	0.5307	0.1267	13.6791	3.2914	0.1361	98.7003	69.6671
JS23_plag4	64 / 4 .	Microphenocryst	50.4649	0.3989	29.2415	1.9272	0.879	14.1703	3.0794	0.1711	100.332	71.7755
JS23_plag4	64 / 5 .	Microphenocryst	49.9702	0.0861	30.6695	0.5231	0.1349	13.8502	3.2152	0.1296	98.5787	70.4194
JS23_plag5	65 / 1 .	Microphenocryst	50.1667	0.0914	31.1428	0.5184	0.1335	14.1001	3.1885	0.1547	99.4962	70.9626
JS23_plag5	65 / 2 .	Microphenocryst	48.9224	0.0572	31.6967	0.5241	0.116	14.74	2.878	0.1151	99.0494	73.8929
JS23_plag5	65 / 3 .	Microphenocryst	49.56	0.0692	31.2348	0.5404	0.1254	13.9788	3.2277	0.1301	98.8665	70.5309
JS23_plag5	65 / 4 .	Microphenocryst	52.7359	0.1069	26.447	0.7574	0.2335	9.6097	5.1849	0.8412	95.9166	50.599
JS23_plag6	66 / 1 .	Phenocryst	50.857	0.0692	30.6856	0.5199	0.4512	13.4176	3.2233	0.1887	99.4124	69.701
JS23_plag6	66 / 2 .	Phenocryst	49.9065	0.0718	31.364	0.5092	0.1282	14.2136	3.1816	0.105	99.4798	71.172
JS23_plag6	66 / 3 .	Phenocryst	50.7624	0.0806	31.2839	0.5446	0.1305	14.0102	3.0902	0.1214	100.024	71.4734
JS23_plag6	66 / 4 .	Phenocryst	63.5343	0.136	21.6225	0.4761	0.0194	2.7303	8.0519	2.2797	98.8503	15.7817
JS23_plag7	67 / 1 .	Groundmass	50.4714	0.0927	31.2905	0.6613	0.1469	14.2272	3.1738	0.1004	100.164	71.242
JS23_plag7	67 / 2 .	Groundmass	50.6007	0.0959	31.1028	0.6031	0.1477	13.967	3.2911	0.1243	99.9325	70.1073
JS23_plag7	67 / 3 .	Groundmass	51.3851	0.1037	30.2254	0.6757	0.1089	13.0064	3.6955	0.1887	99.3894	66.0442
JS23_plag8	68 / 1 .	Phenocryst	49.8011	0.073	31.6628	0.4863	0.1378	14.6915	2.8953	0.1114	99.8593	73.7133
JS23_plag8	68 / 2 .	Phenocryst	49.3063	0.0707	31.0471	0.5542	0.4626	13.9584	2.7234	0.1115	98.2342	73.907
JS23_plag8	68 / 3 .	Phenocryst	50.0767	0.0761	31.5009	0.4968	0.1591	14.3384	3.0099	0.1321	99.7901	72.4715
JS23_plag8	68 / 4 .	Phenocryst	48.9795	0.0733	31.0035	0.5445	0.1302	14.4308	3.0475	0.1124	98.3217	72.3518
JS23_plag9	69 / 1 .	Phenocryst	51.5841	0.0988	30.0184	0.7257	0.1257	13.0898	3.7345	0.1636	99.5406	65.9521
JS23_plag9	69 / 2 .	Phenocryst	51.4471	0.0903	29.9438	0.7867	0.1343	12.7391	3.678	0.1288	98.9482	65.684
JS23_plag9	69 / 3 .	Phenocryst	52.3839	0.0859	29.9471	0.6973	0.1314	12.3553	4.0572	0.2145	99.8727	62.7272
JS23_plag10	70 / 1 .	Microphenocryst	50.4922	0.1114	30.8528	0.5598	0.1492	13.5566	3.5238	0.1653	99.4112	68.0109
JS23_plag10	70 / 2 .	Microphenocryst	51.8239	0.0775	30.7132	0.6411	0.1567	13.4323	3.649	0.1348	100.628	67.0434
JS23_plag10	70 / 3 .	Microphenocryst	53.1121	0.1013	29.1107	0.7836	0.1325	11.7572	4.4432	0.2395	99.6801	59.388
JS23_plag11	71 / 1 .	Microphenocryst	50.9476	0.1152	30.0312	0.6154	0.1337	12.9605	3.663	0.1611	98.6278	66.1629
JS23_plag11	71 / 2 .	Microphenocryst	53.2076	0.1151	28.394	0.7681	0.1371	11.2729	4.3809	0.2433	98.519	58.7123
JS23_plag11	71 / 3 .	Microphenocryst	57.4808	0.1238	26.4645	0.5663	0.0673	8.3185	6.0196	0.4848	99.5256	43.3005
JS23_plag12	72 / 1 .	Phenocryst	51.2019	0.0791	30.7145	0.4812	0.1417	13.8415	3.4654	0.1266	100.052	68.8214
JS23_plag12	72 / 2 .	Phenocryst	49.672	0.0806	31.4093	0.5106	0.135	14.5041	3.0125	0.0911	99.4151	72.683
JS23_plag12	72 / 3 .	Phenocryst	50.4801	0.0829	31.0482	0.4954	0.1349	13.8485	3.3676	0.1286	99.5863	69.4431
JS23_plag12	72 / 4 .	Phenocryst	51.0816	0.0565	30.6221	0.4536	0.1261	13.4916	3.5207	0.1274	99.4795	67.9254
JS23_plag12	72 / 5 .	Phenocryst	49.8345	0.0926	31.3271	0.5972	0.1729	14.2294	3.05	0.0992	99.4029	72.0533
JS23_plag12	72 / 6 .	Phenocryst	49.9684	0.0749	31.1576	0.6458	0.2132	14.0837	3.2507	0.1319	99.5262	70.5388
JS23_plag13	73 / 1 .	Microphenocryst	49.9723	0.0769	31.517	0.6292	0.2699	14.3066	2.9853	0.1119	99.869	72.5908
JS23_plag13	73 / 2 .	Microphenocryst	49.4596	0.0714	31.6466	0.5173	0.2116	14.5005	2.9123	0.1085	99.4279	73.3446
JS23_plag13	73 / 3 .	Microphenocryst	51.3337	0.0643	30.3937	0.4488	0.1424	12.9903	3.5769	0.147	99.0971	66.7444
JS23_plag13	73 / 4 .	Microphenocryst	50.8316	0.08	31.1427	0.5117	0.1505	13.7095	3.4141	0.1259	99.966	68.9357
JS23_plag13	73 / 5 .	Microphenocryst	55.0152	0.1154	28.2194	0.7925	0.1174	10.6107	4.8875	0.3003	100.058	54.5405
JS23_plag14	74 / 1 .	Groundmass	50.1027	0.0565	31.5102	0.5541	0.1304	14.5173	3.0549	0.1048	100.031	72.4228
JS23_plag14	74 / 2 .	Groundmass	38.0493	0.0506	19.5579	0.4888	0.1375	13.1931	3.7738	0.1685	75.4195	65.8935
JS23_plag14	74 / 3 .	Groundmass	50.8439	0.0488	30.1721	0.453	0.1402	13.3803	3.6926	0.1321	98.863	66.6943
JS23_plag15	75 / 1 .	Phenocryst	49.8483	0.0575	30.7263	0.5125	0.2929	13.9658	3.1852	0.1044	98.6928	70.7865
JS23_plag15	75 / 2 .	Phenocryst	50.6805	0.0556	31.1917	0.4669	0.1393	14.0837	3.2195	0.1128	99.9498	70.7388
JS23_plag15	75 / 3 .	Phenocryst	48.1867	0.0829	31.6528	0.5873	0.2162	14.804	2.6053	0.0975	98.2328	75.8466
JS23_plag15	75 / 4 .	Phenocryst	49.3272	0.0578	30.988	0.4906	0.1363	13.8336	3.1629	0.1189	98.1151	70.735
JS23_plag15	75 / 5 .	Phenocryst	49.6509	0.0634	31.8901	0.5114	0.1217	14.6915	2.8126	0.1308	99.8725	74.2709
JS26_plag1	25 / 1 .	Microphenocryst	51.2789	0.0769	31.0448	0.5934	0.1513	13.8527	3.2737	0.1329	100.405	70.0462
JS26_plag1	25 / 2 .	Microphenocryst	50.4205	0.079	30.6892	0.6525	0.1475	13.8198	3.3952	0.1413	99.3449	69.2254
JS26_plag1	25 / 3 .	Microphenocryst	50.1492	0.0776	30.3016	0.8577	0.2918	13.742	3.1058	0.1305	98.6561	70.9741
JS26_plag1	25 / 4 .	Microphenocryst	52.089	0.093	29.9865	0.7777	0.1408	13.2418	3.8212	0.1637	100.314	65.6955
JS26_plag2	26 / 1 .	Groundmass	52.432	0.1291	29.9061	0.9536	0.1193	12.8158	3.8107	0.1958	100.362	65.0174
JS26_plag2	26 / 2 .	Groundmass	53.1117	0.1175	28.9198	0.9779	0.113	11.6316	4.4555	0.236	99.5631	59.0619
JS26_plag3	27 / 1 .	Groundmass	52.1816	0.0908	29.8094	0.941	0.1326	12.6372	4.0278	0.1801	100	63.422
JS26_plag3	27 / 2 .	Groundmass	51.1933	0.081	30.4237	0.9846	0.0717	13.4035	3.5373	0.1543	99.8494	67.6797
JS26_plag4	28 / 1 .	Phenocryst	51.0401	0.0775	30.6154	0.569	0.1232	13.3412	3.6652	0.1594	99.5911	66.7947
JS26_plag4	28 / 2 .	Phenocryst	51.1249	0.0891	30.3017	0.5785	0.1409	13.249	3.6345	0.1603	99.2789	66.8274
JS26_plag4	28 / 3 .	Phenocryst	51.1153	0.0845	30.5435	0.7331	0.1606	13.3119	3.6489	0.1544	99.7522	66.8447
JS26_plag4	28 / 4 .	Phenocryst	50.9586	0.0768	30.9209	0.6405	0.1594	13.7737	3.4585	0.1348	100.123	68.7588
JS26_plag4	28 / 5 .	Phenocryst	50.9129	0.0864	30.0617	0.7427	0.1452	13.1118	3.7798	0.1469	98.9874	65.7186
JS26_plag5	29 / 1 .	Microphenocryst	51.11	0.0886	30.9646	0.577	0.1394	13.5151	3.5082	0.1338	100.037	68.0407
JS26_plag5	29 / 2 .	Microphenocryst	51.3231	0.0907	30.1121	0.5818	0.1462	12.8554	3.8781	0.1549	99.1423	64.6881
JS26_plag5	29 / 3 .	Microphenocryst	50.7073	0.0995	30.7591	0.7646	0.1601	13.7063	3.49	0.1418	99.8288	68.4578
JS26_plag6	30 / 1 .	Phenocryst	50.9142	0.0777	30.4434	0.5445	0.1245	13.4586	3.6652	0.1603	99.3884	66.9887
JS26_plag6	30 / 2 .	Phenocryst	52.3051	0.0725	30.4108	0.5199	0.1391	12.6537	3.9122	0.1657	100.179	64.1249
JS26_plag6	30 / 3 .	Phenocryst	50.4805	0.067	30.9507	0.6653	0.1358	13.7464	3.3937	0.1348	99.5741	69.1213
JS26_plag6	30 / 4 .	Phenocryst	51.0012	0.0923	30.1545	0.692	0.1795	13.2654	3.7079	0.1666	99.2594	66.4103
JS26_plag6	30 / 5 .	Phenocryst	50.7632	0.0891	30.9395	0.632	0.1626	13.7921	3.3556	0.131	99.8651	69.4322
JS26_plag6	30 / 6 .	Phenocryst	51.2005	0.0607	30.6103	0.6188	0.127	13.3172	3.6648	0.1363	99.7357	66.7571
JS26_plag7	31 / 1 .	Microphenocryst	51.6362	0.089	30.3748	0.6343	0.1548	12.8805	3.8777	0.1649	99.8122	64.735
JS26_plag7	31 / 2 .	Microphenocryst	51.5317	0.0773	30.2417	0.5962	0.1225	13.0339	3.7618	0.1591	99.5242	65.6919
JS26_plag7	31 / 3 .	Microphenocryst	52.6831	0.1055	29.0473	0.7815	0.1197	10.6071	4.8055	0.2714	98.4211	54.9513
JS26_plag8	32 / 1 .	Phenocryst	50.837	0.1025	30.9314	0.707	0.1364	13.7047	3.3965	0.1388	99.9545	69.0388
JS26_plag8	32 / 2 .	Phenocryst	51.752	0.0917	30.5089	0.6307	0.144	13.1639	3.6874	0.1659	100.145	66.3626
JS26_plag8	32 / 3 .	Phenocryst	51.647	0.1	30.5915	0.7195	0.2032	13.2712	3.6455	0.1856	100.363	66.7975
JS26_plag8	32 / 4 .	Phenocryst	50.6029	0.0696	29.9419	0.6373	0.1237	13.1597	3.7692	0.1558	98.46	65.8639
JS26_plag9	33 / 1 .	Megaphenocryst	51.9235	0.0742	29.4964	0.5088	0.122	12.5993	4.0406	0.1819	98.9466	63.2786
JS26_plag9	33 / 2 .	Megaphenocryst	52.8182	0.0735	28.9192	0.4596	0.1208	11.7956	4.3474	0.1995	98.7338	59.9909
JS26_plag9	33 / 3 .	Megaphenocryst	52.2053	0.0918	30.0307	0.5845	0.1429	12.6588	4.0161	0.2002	99.9305	63.529
JS26_plag9	33 / 4 .	Megaphenocryst	52.3935	0.0741	29.7909	0.5438	0.1168	12.6559	4.092	0.201	99.868	63.0888
JS26_plag9	33 / 5 .	Megaphenocryst	49.9545	0.0905	30.2789	0.66	0.154	13.666	3.4638	0.1424	98.4102	68.5569
JS26_plag9	33 / 6 .	Megaphenocryst	50.4815	0.0803	30.7605	0.571	0.1452	13.9068	3.3565	0.1389	99.4408	69.602
JS26_plag9	33 / 7 .	Megaphenocryst	50.0351	0.0797	31.0423	0.5738	0.1438	14.2286	3.2017	0.1183	99.4234	71.0643
JS26_plag9	33 / 8 .	Megaphenocryst	49.7199	0.0898	30.8889	0.6145	0.1561	14.146	3.1768	0.1324	98.9243	71.1051
JS26_plag10	34 / 1 .	Megaphenocryst	50.9933	0.0857	29.7988	0.6965	0.1455	12.9754	3.7124	0.1707	98.5783	65.8882
JS26_plag10	34 / 2 .	Megaphenocryst	51.0647	0.0664	29.5213	0.5119	0.1169	12.653	3.9376	0.1645	98.0363	63.9746
JS26_plag10	34 / 3 .	Megaphenocryst	51.3703	0.082	30.0989	0.568	0.126	13.1505	3.6698	0.1612	99.2267	66.4466
JS26_plag10	34 / 4 .	Megaphenocryst	50.9014	0.0778	30.7277	0.586	0.1429	13.5968	3.4216	0.1545	99.6087	68.7115
JS26_plag10	34 / 5 .	Megaphenocryst	50.4645	0.0844	30.4308	0.6907	0.1341	13.5866	3.4485	0.1592	98.9987	68.5267
JS26_plag10	34 / 6 .	Megaphenocryst	50.4152	0.1067	29.093	1.0117	0.2148	12.6331	3.59	0.1982	97.2626	66.0407
JS26_plag11	35 / 1 .	Megaphenocryst	51.5843	0.0654	29.733	0.5539	0.1341	12.8847	3.7716	0.176	98.9029	65.3731
JS26_plag11	35 / 2 .	Megaphenocryst	51.0248	0.076	30.0078	0.5604	0.1257	13.0103	3.6875	0.172	98.6646	66.0995
JS26_plag11	35 / 3 .	Megaphenocryst	53.1678	0.0829	28.9585	0.3765	0.1111	11.7043	4.3669	0.2271	98.995	59.6967
JS26_plag11	35 / 4 .	Megaphenocryst	51.4286	0.0752	29.9437	0.592	0.1389	12.8839	3.7247	0.1717	98.9587	65.6544
JS26_plag11	35 / 5 .	Megaphenocryst	51.4219	0.0761	30.0949	0.5864	0.1411	13.0987	3.7123	0.1441	99.2756	66.101
JS26_plag11	35 / 6 .	Megaphenocryst	53.8045	0.1205	28.4204	0.8194	0.1184	10.9166	4.7145	0.262	99.1762	56.1335
JS26_plag12	36 / 1 .	Megaphenocryst	51.2654	0.0551	30.2844	0.6372	0.1451	13.0774	3.6279	0.152	99.2444	66.5782
JS26_plag12	36 / 2 .	Megaphenocryst	50.9141	0.0736	31.1914	0.5424	0.1126	13.6775	3.4959	0.1609	100.168	68.3759
JS26_plag12	36 / 3 .	Megaphenocryst	51.5185	0.0754	30.4794	0.5511	0.1275	13.1862	3.7584	0.189	99.8854	65.9736
JS26_plag12	36 / 4 .	Megaphenocryst	50.4036	0.0973	30.9579	0.5414	0.1177	13.7746	3.3239	0.1519	99.3683	69.6064
JS26_plag12	36 / 5 .	Megaphenocryst	52.684	0.0563	29.0715	0.5532	0.135	11.9397	4.3211	0.2367	98.9974	60.4272
JS26_plag12	36 / 6 .	Megaphenocryst	51.1185	0.0931	30.1738	0.5741	0.1461	13.1504	3.679	0.1492	99.0841	66.3906
JS26_plag12	36 / 7 .	Megaphenocryst	50.818	0.0578	30.5158	0.6237	0.164	13.4991	3.644	0.1279	99.4504	67.1831
JS26_plag12	36 / 8 .	Megaphenocryst	52.4681	0.1196	29.325	0.8122	0.1271	12.2447	4.1764	0.1973	99.4704	61.8357
JS26_plag13	37 / 1 .	Microphenocryst	51.2909	0.0866	30.3721	0.5406	0.1328	13.1864	3.7394	0.1567	99.5056	66.0876
JS26_plag13	37 / 2 .	Microphenocryst	50.2091	0.096	31.0537	0.5931	0.1421	14.0987	3.2015	0.1333	99.5273	70.8767
JS26_plag13	37 / 3 .	Microphenocryst	51.9246	0.0792	29.8123	0.8132	0.2028	12.9408	3.9705	0.1719	99.9152	64.3005
JS26_plag13	37 / 4 .	Microphenocryst	50.3838	0.0763	31.1994	0.6313	0.1331	13.9534	3.3486	0.1309	99.8568	69.7225
JS26_plag14	38 / 1 .	Phenocryst	50.8823	0.0665	31.2819	0.5249	0.1234	13.9492	3.3907	0.1258	100.345	69.4517
JS26_plag14	38 / 2 .	Phenocryst	50.9943	0.0915	30.7666	0.5078	0.1309	13.3586	3.5349	0.1413	99.5258	67.6211
JS26_plag14	38 / 3 .	Phenocryst	50.4636	0.0685	31.81	0.5703	0.1215	14.1614	3.2358	0.1032	100.534	70.7481
JS26_plag14	38 / 4 .	Phenocryst	52.3227	0.0697	30.2924	0.5061	0.1442	12.7399	3.958	0.1676	100.201	64.0132
JS26_plag14	38 / 5 .	Phenocryst	50.4691	0.0864	31.2276	0.5798	0.1412	14.0043	3.3118	0.1238	99.9441	70.0318
JS26_plag14	38 / 6 .	Phenocryst	48.8905	0.1029	30.1313	0.8121	0.1166	12.8371	3.9608	0.1556	97.0069	64.1719
JS26_plag15	39 / 1 .	Microphenocryst	50.3082	0.1013	30.8977	0.6453	0.145	13.7807	3.2998	0.1334	99.3113	69.7695
JS26_plag15	39 / 2 .	Microphenocryst	51.3737	0.0736	30.5951	0.634	0.1462	13.3698	3.5737	0.1503	99.9164	67.4001
JS26_plag15	39 / 3 .	Microphenocryst	51.4236	0.0793	30.6161	0.6076	0.1654	13.039	3.7395	0.1647	99.8351	65.8346
JS26_plag15	39 / 4 .	Microphenocryst	50.2213	0.0914	31.0347	0.6216	0.134	14.2745	3.245	0.1187	99.7412	70.8539
JS26_plag15	39 / 5 .	Microphenocryst	52.4488	0.1017	30.6222	0.8759	0.1132	13.2636	3.9749	0.1728	101.573	64.8388
JS26_plag16	40 / 1 .	Groundmass	51.61	0.1132	30.0602	0.8786	0.0814	12.9271	3.7958	0.1981	99.6643	65.3027
JS26_plag16	40 / 2 .	Groundmass	53.0609	0.0877	30.2139	0.8654	0.0901	12.6377	4.0234	0.2283	101.207	63.4483
JS26_plag17	41 / 1 .	Groundmass	50.0021	0.1145	29.7228	0.9468	0.085	12.9993	3.876	0.1978	97.9442	64.9543
JS26_plag17	41 / 2 .	Groundmass	57.4216	0.1618	26.4501	0.6736	0.0519	8.4441	6.1745	0.5653	99.9429	43.0449
JS26_plag18	42 / 1 .	Megaphenocryst	49.7959	0.0632	31.5438	0.5202	0.1257	14.5288	3.0512	0.1124	99.7412	72.4628
JS26_plag18	42 / 2 .	Megaphenocryst	51.5746	0.0648	30.4707	0.4784	0.136	12.9055	3.8137	0.1638	99.6075	65.158
JS26_plag18	42 / 3 .	Megaphenocryst	50.9453	0.0618	31.2655	0.4822	0.1075	13.8571	3.2607	0.1468	100.127	70.1363
JS26_plag18	42 / 4 .	Megaphenocryst	52.0209	0.055	30.0221	0.571	0.1285	12.7719	3.9061	0.2035	99.679	64.3743
JS26_plag18	42 / 5 .	Megaphenocryst	50.1553	0.0831	30.662	0.6319	0.1361	13.5451	3.3449	0.1438	98.7022	69.1155
JS26_plag19	43 / 1 .	Phenocryst	50.4071	0.0826	30.8538	0.6251	0.1077	13.7795	3.4216	0.1581	99.4355	68.9977
JS26_plag19	43 / 2 .	Phenocryst	50.964	0.0855	30.4419	0.5712	0.1301	13.2473	3.5788	0.142	99.1608	67.1661
JS26_plag19	43 / 3 .	Phenocryst	49.9249	0.0758	31.3817	0.5635	0.1369	14.2445	3.157	0.1318	99.616	71.3754
JS26_plag19	43 / 4 .	Phenocryst	50.4316	0.0887	31.131	0.5768	0.1325	13.8415	3.3844	0.1273	99.7137	69.3266
JS26_plag19	43 / 5 .	Phenocryst	50.2562	0.0718	31.172	0.6137	0.1342	13.9965	3.2274	0.1388	99.6104	70.5592
JS26_plag19	43 / 6 .	Phenocryst	50.078	0.0877	30.8232	0.7319	0.2022	13.8316	3.2089	0.1337	99.0973	70.4322
JS26_plag19	43 / 7 .	Phenocryst	50.3107	0.0792	31.1928	0.6657	0.1305	13.9278	3.331	0.1391	99.7768	69.795
JS26_plag19	43 / 8 .	Phenocryst	51.2445	0.1031	30.4606	0.8049	0.1317	13.2846	3.6007	0.178	99.8081	67.0935
JS26_plag20	44 / 1 .	Microphenocryst	49.8453	0.0557	31.5516	0.5398	0.135	14.392	3.1126	0.1199	99.752	71.8726
JS26_plag20	44 / 2 .	Microphenocryst	50.7173	0.0834	31.4086	0.5123	0.1196	14.1219	3.2249	0.1235	100.311	70.7602
JS26_plag20	44 / 3 .	Microphenocryst	50.4509	0.0686	30.6581	0.6353	0.1389	13.9304	3.2668	0.1075	99.2563	70.2076
JS26_plag20	44 / 4 .	Microphenocryst	50.5412	0.1025	30.66	0.7429	0.129	13.5908	3.5378	0.1462	99.4505	67.9794
JS26_plag21	45 / 1 .	Groundmass	51.6554	0.1049	30.0134	0.9468	0.1215	12.9171	3.8537	0.1812	99.7939	64.9412
JS26_plag21	45 / 2 .	Groundmass	59.7572	0.1545	24.0751	0.6742	0.1196	5.8924	7.1134	0.9707	98.7572	31.4023
JS26_plag22	46 / 1 .	Phenocryst	51.1082	0.0894	30.3664	0.6464	0.1424	13.3375	3.6216	0.1878	99.4996	67.0534
JS26_plag22	46 / 2 .	Phenocryst	52.6251	0.0738	29.7944	0.4849	0.1296	12.3469	4.0712	0.2044	99.7303	62.6307
JS26_plag22	46 / 3 .	Phenocryst	53.0271	0.0694	29.3432	0.4926	0.1291	11.7214	4.477	0.2092	99.4691	59.1314
JS26_plag22	46 / 4 .	Phenocryst	36.9257	0.0839	24.1287	0.5923	0.1512	12.1752	3.0931	0.1925	77.3427	68.5069
JS26_plag22	46 / 5 .	Phenocryst	51.7302	0.0877	30.3461	0.6446	0.1568	13.1866	3.7572	0.1595	100.069	65.9814
JS26_plag22	46 / 6 .	Phenocryst	50.6061	0.0999	30.4914	0.746	0.2022	13.3466	3.4762	0.1673	99.1357	67.9671
JS26_plag23	47 / 1 .	Groundmass	59.4055	0.1176	24.9886	0.7657	0.1273	6.798	6.76	0.735	99.6975	35.7219
JS26_plag23	47 / 2 .	Groundmass	52.7805	0.0907	29.498	0.9348	0.1211	12.1302	4.2096	0.2055	99.9704	61.4263
JS26_plag24	48 / 1 .	Groundmass	58.3539	0.1476	25.2365	0.5777	0.0453	6.8487	6.9649	0.7814	98.9559	35.2085
JS26_plag24	48 / 2 .	Groundmass	59.6147	0.1892	22.1265	0.7176	0.0067	6.496	7.4454	1.2889	97.8849	32.5311
JS27_Plag1	48 / 1 .	Megaphenocrysts	51.0834	0.071	30.5602	0.4928	0.147	13.6153	3.4675	0.1577	99.5948	68.4537
JS27_Plag1	48 / 2 .	Megaphenocrysts	49.9308	0.0528	31.078	0.5148	0.137	14.2251	3.1141	0.1327	99.1854	71.6264
JS27_Plag1	48 / 3 .	Megaphenocrysts	49.8907	0.0644	30.9986	0.4982	0.1342	14.1797	3.1539	0.1252	99.0449	71.3023
JS27_Plag1	48 / 4 .	Megaphenocrysts	48.3993	0.0944	36.665	0.6016	0.2652	12.5252	3.0816	0.1485	101.781	69.1946
JS27_Plag1	48 / 5 .	Megaphenocrysts	50.2012	0.0679	31.3424	0.4855	0.1494	14.3022	3.1607	0.1277	99.837	71.434
JS27_Plag1	48 / 6 .	Megaphenocrysts	49.9183	0.0623	30.9	0.5005	0.1347	14.1964	3.0741	0.1259	98.912	71.8476
JS27_Plag1	48 / 7 .	Megaphenocrysts	51.7471	0.0613	31.4402	0.509	0.1524	13.7951	3.6922	0.1384	101.536	67.3714
JS27_Plag1	48 / 8 .	Megaphenocrysts	50.2351	0.0648	30.8322	0.5014	0.1366	14.2804	3.0595	0.1285	99.2385	72.0627
JS27_Plag1	48 / 9 .	Megaphenocrysts	44.6899	0.0641	27.7349	0.5649	0.1051	13.7779	2.2068	0.1267	89.2703	77.5296
JS27_Plag1	48 / 10 .	Megaphenocrysts	50.7283	0.0632	30.6544	0.5281	0.1497	13.7203	3.4096	0.1498	99.4034	68.9808
JS27_Plag1	48 / 11 .	Megaphenocrysts	51.1828	0.0766	29.791	0.5101	0.1445	13.0315	3.7292	0.1794	98.645	65.8837
JS27_Plag1	48 / 12 .	Megaphenocrysts	46.4003	0.0745	28.7967	0.6428	0.1343	14.0849	2.477	0.1161	92.7265	75.8595
JS27_Plag1	48 / 13 .	Megaphenocrysts	49.9654	0.0696	30.8628	0.5875	0.1718	13.5127	3.3508	0.1499	98.6707	69.0267
JS27_Plag1	48 / 14 .	Megaphenocrysts	41.1153	0.072	25.2497	0.5346	0.1064	13.0501	1.77	0.1492	82.0473	80.2937
JS27_Plag1	48 / 15 .	Megaphenocrysts	51.4193	0.0926	29.8155	0.8235	0.1736	13.0513	3.87	0.1855	99.4311	65.0803
JS27_Plag2	49 / 1 .	Phenocryst	50.718	0.0772	30.1545	0.5512	0.1747	13.421	3.4627	0.1481	98.7073	68.1725
JS27_Plag2	49 / 2 .	Phenocryst	49.8829	0.0983	30.462	0.5876	0.1708	13.968	3.292	0.1267	98.5883	70.1031
JS27_Plag2	49 / 3 .	Phenocryst	49.0748	0.0855	30.5361	0.6145	0.2375	14.2345	3.3333	0.1513	98.2675	70.2377
JS27_Plag2	49 / 4 .	Phenocryst	44.0502	0.0841	28.0859	0.7482	0.4668	11.0119	2.2411	0.185	86.8732	73.0852
JS27_Plag2	49 / 5 .	Phenocryst	49.7299	0.0762	30.5008	0.5757	0.167	14.0981	3.2259	0.1435	98.5169	70.7188
JS27_Plag2	49 / 6 .	Phenocryst	50.6184	0.0627	30.3207	0.5327	0.1587	13.5028	3.4466	0.1594	98.802	68.405
JS27_Plag2	49 / 7 .	Phenocryst	49.0252	0.0583	31.082	0.5984	0.1669	14.7402	2.7936	0.0971	98.5617	74.4632
JS27_Plag2	49 / 8 .	Phenocryst	56.9552	0.155	24.1265	0.7044	0.085	6.9058	6.4102	0.6362	95.9783	37.3182
JS27_Plag3	50 / 1 .	Microphenocryst	49.3781	0.0728	30.9348	0.5311	0.1512	14.5432	3.0199	0.1079	98.739	72.6878
JS27_Plag3	50 / 2 .	Microphenocryst	49.2678	0.0625	31.1069	0.5943	0.1682	14.6055	2.8836	0.1112	98.7999	73.678
JS27_Plag3	50 / 3 .	Microphenocryst	53.0805	0.1257	28.6874	0.9075	0.1335	11.6378	4.495	0.2264	99.2937	58.8612
JS27_Plag4	51 / 1 .	Groundmass	50.5223	0.072	30.1503	0.9029	0.1451	13.5067	3.4728	0.1799	98.952	68.2474
JS27_Plag5	52 / 1 .	Groundmass	54.9322	0.163	26.8919	0.9938	0.1705	9.4704	5.1779	0.3689	98.1685	50.2678
JS27_Plag6	53 / 1 .	Microphenocryst	50.7083	0.071	30.618	0.5577	0.1606	13.8584	3.2568	0.1527	99.3834	70.1633
JS27_Plag6	53 / 2 .	Microphenocryst	54.8696	0.067	33.654	0.5801	0.1971	13.8965	3.6816	0.1307	107.077	67.5952
JS27_Plag6	53 / 3 .	Microphenocryst	49.9569	0.0677	31.094	0.5833	0.1229	14.0942	3.1666	0.1378	99.2233	71.0958
JS27_Plag7	54 / 1 .	Microphenocryst	51.2398	0.0908	30.1918	0.6225	0.1886	13.3897	3.516	0.1319	99.3711	67.7892
JS27_Plag7	54 / 2 .	Microphenocryst	51.6128	0.0991	29.0988	0.8508	0.1518	12.5212	4.0439	0.2129	98.5914	63.115
JS27_Plag8	55 / 1 .	Groundmass	52.8233	0.1116	28.6354	0.9151	0.1292	11.8997	4.3654	0.2157	99.0954	60.1026
JS27_Plag9	56 / 1 .	Groundmass	55.2004	0.1543	27.184	0.786	0.0945	9.8636	5.3696	0.3602	99.0126	50.3759
JS27_Plag10	57 / 1 .	Microphenocryst	49.4098	0.0602	30.6499	0.582	0.1728	14.3306	2.9233	0.1186	98.2473	73.0394
JS27_Plag10	57 / 2 .	Microphenocryst	49.2778	0.0888	31.3024	0.5633	0.1598	14.6017	2.9563	0.1297	99.0799	73.1871
JS27_Plag11	58 / 1 .	Microphenocryst	49.0961	0.0702	31.2556	0.5965	0.1604	14.6834	2.9052	0.1039	98.8711	73.6364
JS27_Plag11	58 / 2 .	Microphenocryst	52.4735	0.1083	29.0366	0.8512	0.1471	11.9721	4.2549	0.1965	99.0402	60.8604
JS27_Plag12	59 / 1 .	Phenocryst	50.9205	0.0828	29.9007	0.5167	0.1595	13.2249	3.6437	0.1805	98.6293	66.7309
JS27_Plag12	59 / 2 .	Phenocryst	50.6036	0.0986	29.2013	0.559	0.1792	12.3629	3.9599	0.1605	97.1251	63.3072
JS27_Plag12	59 / 3 .	Phenocryst	52.0231	0.0755	29.408	0.5477	0.17	12.4815	3.9759	0.2001	98.8818	63.4353
JS27_Plag12	59 / 4 .	Phenocryst	49.8729	0.0665	31.2761	0.4648	0.1597	14.4408	2.9469	0.1181	99.3458	73.0319
JS27_Plag12	59 / 5 .	Phenocryst	49.8076	0.069	30.6586	0.5666	0.1763	14.3863	2.9773	0.1086	98.7503	72.7544
JS27_Plag12	59 / 6 .	Phenocryst	50.4173	0.0721	30.8263	0.5176	0.1706	13.8634	3.0554	0.1437	99.0664	71.4895
JS27_Plag12	59 / 7 .	Phenocryst	49.8945	0.0663	30.9412	0.5796	0.1828	14.3346	3.0079	0.1235	99.1303	72.4795
JS27_Plag12	59 / 8 .	Phenocryst	50.6306	0.0719	30.4778	0.5436	0.1731	13.6865	3.4997	0.1382	99.2214	68.3666
JS27_Plag12	59 / 9 .	Phenocryst	49.8686	0.0684	31.1833	0.543	0.1651	14.3016	2.9781	0.1322	99.2402	72.6319
JS27_Plag12	59 / 10 .	Phenocryst	56.3999	0.1253	26.9493	0.6397	0.0969	8.9404	5.7088	0.4025	99.2629	46.394
JS30_plag1	49 / 1 .	Phenocryst	51.4773	0.0912	30.6176	0.5703	0.1149	13.4719	3.5889	0.1904	100.123	67.4739
JS30_plag1	49 / 2 .	Phenocryst	51.1871	0.1091	30.7145	0.6026	0.118	13.4969	3.4088	0.1809	99.818	68.6335
JS30_plag1	49 / 3 .	Phenocryst	52.0637	0.0815	30.1858	0.6053	0.1351	12.8592	3.8827	0.2193	100.032	64.6678
JS30_plag1	49 / 4 .	Phenocryst	51.6324	0.0915	30.7559	0.6055	0.1161	13.2754	3.6047	0.1765	100.258	67.0537
JS30_plag1	49 / 5 .	Phenocryst	51.4077	0.0889	30.6381	0.6725	0.077	13.1353	3.5925	0.2112	99.8231	66.894
JS30_plag1	49 / 6 .	Phenocryst	50.4951	0.0912	31.3306	0.6099	0.0864	13.7879	3.3713	0.1563	99.9288	69.3266
JS30_plag2	50 / 1 .	Microphenocryst	49.2047	0.1114	29.1917	0.8011	0.4503	12.7927	3.5066	0.337	96.3956	66.8446
JS30_plag2	50 / 2 .	Microphenocryst	50.0319	0.0991	30.845	0.7924	0.2676	13.7165	3.1345	0.1889	99.0759	70.7458
JS30_plag2	50 / 3 .	Microphenocryst	50.7137	0.0927	30.9142	0.7515	0.1153	13.8611	3.3973	0.1638	100.01	69.2758
JS30_plag3	51 / 1 .	Microphenocryst	50.3671	0.0965	30.7824	0.8032	0.0936	13.7156	3.4015	0.1827	99.4426	69.0243
JS30_plag3	51 / 2 .	Microphenocryst	52.1502	0.1517	29.5023	1.1683	0.1395	12.1796	3.9661	0.428	99.6858	62.9231
JS30_plag3	51 / 3 .	Microphenocryst	51.8343	0.1031	30.5659	1.299	0.322	13.1255	3.4207	0.2609	100.931	67.9538
JS30_plag4	52 / 1 .	Groundmass	51.6654	0.1368	30.5013	0.966	0.2109	12.9138	3.8053	0.224	100.423	65.2227
JS30_plag4	52 / 2 .	Groundmass	52.9054	0.1366	29.8252	1.0569	0.1993	12.4591	4.1702	0.2946	101.047	62.2794
JS30_plag5	53 / 1 .	Microphenocryst	51.3833	0.0907	31.1149	0.6244	0.1217	13.9142	3.3223	0.147	100.719	69.8295
JS30_plag5	53 / 2 .	Microphenocryst	52.3252	0.062	30.4641	0.617	0.1264	12.8257	3.8096	0.1845	100.415	65.0415
JS30_plag5	53 / 3 .	Microphenocryst	50.4636	0.0964	31.1472	0.7414	0.1164	13.8679	3.2576	0.1994	99.89	70.1725
JS30_plag6	54 / 1 .	Microphenocryst	51.2428	0.1222	31.0318	0.7319	0.1271	13.6009	3.4409	0.1714	100.469	68.5969
JS30_plag6	54 / 2 .	Microphenocryst	50.699	0.0958	30.979	0.7443	0.1308	13.8579	3.3788	0.1724	100.058	69.387
JS30_plag6	54 / 3 .	Microphenocryst	50.7694	0.0991	30.888	0.7367	0.2057	13.8476	3.3286	0.1854	100.061	69.6883
JS30_plag7	55 / 1 .	Groundmass	51.7945	0.0922	30.354	0.9191	0.0839	12.874	3.8187	0.2269	100.163	65.0728
JS30_plag7	55 / 2 .	Groundmass	55.4621	0.1975	26.1862	1.7118	0.3413	9.0813	5.3251	0.546	98.8511	48.5186
JS30_plag8	56 / 1 .	Microphenocryst	51.7164	0.0945	29.945	1.0364	0.3699	12.7652	3.6719	0.2325	99.8316	65.7675
JS30_plag8	56 / 2 .	Microphenocryst	50.7695	0.0998	30.0805	0.9553	0.0773	12.9429	3.8269	0.2447	98.9969	65.1453
JS30_plag8	56 / 3 .	Microphenocryst	53.9951	0.1648	27.9348	1.2507	0.1105	10.7345	4.8469	0.4115	99.4488	55.0344
JS30_plag9	57 / 1 .	Microphenocryst	52.2942	0.1241	29.894	0.8762	0.2167	12.6574	4.0105	0.2422	100.315	63.5588
JS30_plag9	57 / 2 .	Microphenocryst	50.0524	0.1061	30.7517	0.8768	0.0712	13.6617	3.4661	0.222	99.208	68.5358
JS30_plag10	58 / 1 .	Groundmass	48.9492	0.0914	32.0366	0.8875	0.8185	12.2186	3.0901	0.3099	98.4017	68.6045
JS30_plag10	58 / 2 .	Groundmass	50.9171	0.0942	31.0516	0.9429	0.0645	13.4811	3.5438	0.1947	100.29	67.7658
JS30_plag11	59 / 1 .	Microphenocryst	51.1692	0.0731	30.5878	0.5842	0.1074	13.2268	3.5938	0.2163	99.5587	67.0395
JS30_plag11	59 / 2 .	Microphenocryst	51.9758	0.0707	30.9055	0.5928	0.1213	13.0949	3.6576	0.173	100.591	66.4264
JS30_plag11	59 / 3 .	Microphenocryst	50.3866	0.09	29.6176	0.7213	0.1989	13.0879	3.8056	0.1701	98.0781	65.524
JS30_plag11	59 / 4 .	Microphenocryst	50.8566	0.0851	30.7468	0.8069	0.1094	13.5941	3.5559	0.1971	99.9518	67.8735
JS30_plag11	59 / 5 .	Microphenocryst	50.66	0.0947	30.6913	0.8735	0.1025	13.5295	3.5152	0.2178	99.6845	68.0205
JS30_plag12	60 / 1 .	Phenocryst	51.9817	0.0954	30.6193	0.5147	0.1115	12.9324	3.8669	0.2253	100.347	64.8903
JS30_plag12	60 / 2 .	Phenocryst	51.3025	0.0526	29.4345	0.5233	0.1043	12.6197	3.8718	0.2018	98.1105	64.3016
JS30_plag12	60 / 3 .	Phenocryst	51.1125	0.0754	31.292	0.6901	0.1255	13.727	3.3405	0.1637	100.527	69.4275
JS30_plag12	60 / 4 .	Phenocryst	50.7685	0.0991	30.7495	0.8617	0.1165	13.3852	3.5016	0.2052	99.6874	67.8714
JS30_plag13	61 / 1 .	Phenocryst	50.7647	0.12	30.8043	0.5861	0.2019	13.6883	3.3249	0.202	99.6923	69.4669
JS30_plag13	61 / 2 .	Phenocryst	49.4945	0.0948	29.0755	0.6129	0.1324	13.0831	3.7756	0.1875	96.4562	65.6943
JS30_plag13	61 / 3 .	Phenocryst	51.1428	0.0858	30.1173	0.7112	0.2365	13.032	3.6536	0.1841	99.1632	66.3434
JS30_plag13	61 / 4 .	Phenocryst	50.4195	0.0906	31.0739	0.6099	0.1158	14.1217	3.2336	0.1538	99.8187	70.7041
JS30_plag13	61 / 5 .	Phenocryst	51.8248	0.0927	30.3029	0.6206	0.2226	13.1686	3.7188	0.1779	100.129	66.1811
JS30_plag13	61 / 6 .	Phenocryst	54.754	0.1522	27.7315	1.1619	0.1209	10.5875	5.0361	0.3911	99.9352	53.7425
JS30_plag14	62 / 1 .	Phenocryst	51.4065	0.0937	30.3454	0.6697	0.1172	13.1748	3.6734	0.219	99.6998	66.4659
JS30_plag14	62 / 2 .	Phenocryst	49.4619	0.1007	30.0832	0.6245	0.1202	13.548	3.4132	0.1884	97.5401	68.687
JS30_plag14	62 / 3 .	Phenocryst	51.1834	0.097	29.8613	0.6612	0.1144	12.9119	3.7493	0.2164	98.795	65.5549
JS30_plag14	62 / 4 .	Phenocryst	52.5736	0.0897	29.6636	0.669	0.1102	12.3068	4.1915	0.2373	99.8417	61.87
JS30_plag14	62 / 5 .	Phenocryst	50.6466	0.1111	29.9946	0.7828	0.1208	13.2597	3.7724	0.2058	98.8938	66.0149
JS30_plag15	63 / 1 .	Groundmass	52.3394	0.1611	27.7337	1.3126	0.1252	10.8003	4.5835	0.3875	97.4431	56.5632
JS30_plag15	63 / 2 .	Groundmass	54.4917	0.1816	27.0003	1.4972	0.7247	10.8322	4.8781	0.4282	100.034	55.0999
JS30_plag16	64 / 1 .	Microphenocryst	52.1289	0.0775	30.7146	0.7028	0.1516	12.9199	3.8983	0.1784	100.772	64.6838
JS30_plag16	64 / 2 .	Microphenocryst	51.8529	0.0797	30.8685	0.6801	0.1234	13.7896	3.2898	0.1583	100.842	69.8471
JS30_plag16	64 / 3 .	Microphenocryst	51.8888	0.0816	30.2736	0.6403	0.1289	12.8875	3.9702	0.2135	100.084	64.2075
JS30_plag17	65 / 1 .	Phenocryst	52.9473	0.0529	29.851	0.5038	0.1068	12.3995	4.1204	0.2207	100.203	62.4489
JS30_plag17	65 / 2 .	Phenocryst	52.8481	0.0643	30.2436	0.5303	0.1163	12.4481	4.1011	0.2067	100.558	62.6505
JS30_plag17	65 / 3 .	Phenocryst	51.8385	0.0568	29.7853	0.5018	0.1097	12.5875	3.9032	0.2384	99.0212	64.0572
JS30_plag17	65 / 4 .	Phenocryst	50.0515	0.0645	28.6983	0.4885	0.1387	12.3762	3.6796	0.2022	95.6994	65.0198
JS30_plag17	65 / 5 .	Phenocryst	50.9679	0.0745	29.2017	0.5	0.1146	12.3794	3.6171	0.214	97.0692	65.4143
JS30_plag17	65 / 6 .	Phenocryst	50.6028	0.0913	31.3402	0.5994	0.1048	13.9211	3.3298	0.1484	100.138	69.7924
JS30_plag17	65 / 7 .	Phenocryst	50.6858	0.0691	30.0452	0.6841	0.1162	13.0621	3.5197	0.1887	98.3708	67.2228
JS30_plag18	66 / 1 .	Phenocryst	50.5862	0.0745	30.0808	0.6265	0.1303	13.1947	3.5482	0.1704	98.4116	67.2676
JS30_plag18	66 / 2 .	Phenocryst	50.7972	0.0659	29.6099	0.5393	0.1061	12.9257	3.6627	0.1613	97.8681	66.1045
JS30_plag18	66 / 3 .	Phenocryst	51.3856	0.0731	30.5944	0.5914	0.1239	13.2366	3.6906	0.1895	99.8851	66.4661
JS30_plag18	66 / 4 .	Phenocryst	50.6039	0.0927	30.8094	0.5666	0.118	13.9428	3.3688	0.1422	99.6444	69.5793
JS30_plag18	66 / 5 .	Phenocryst	52.3151	0.0853	30.0837	0.6114	0.1237	12.7043	3.9569	0.1755	100.056	63.9552
JS30_plag18	66 / 6 .	Phenocryst	50.0459	0.0746	30.1448	0.7458	0.0962	13.4829	3.3317	0.2012	98.123	69.1017
JS30_plag19	67 / 1 .	Phenocryst	51.1894	0.1747	29.3685	1.059	0.4282	13.1113	3.6374	0.1903	99.1587	66.5777
JS30_plag19	67 / 2 .	Phenocryst	50.1926	0.0872	30.4996	0.6524	0.1374	13.615	3.347	0.1496	98.6807	69.2119
JS30_plag19	67 / 3 .	Phenocryst	50.3132	0.0874	30.8846	0.6001	0.1194	13.71	3.3231	0.1494	99.1871	69.512
JS30_plag19	67 / 4 .	Phenocryst	50.2953	0.0921	30.4961	0.64	0.1246	13.5289	3.3758	0.1646	98.7172	68.8933
JS30_plag19	67 / 5 .	Phenocryst	51.7558	0.0836	30.2848	0.6354	0.1685	12.8041	3.7455	0.2045	99.6823	65.3882
JS30_plag19	67 / 6 .	Phenocryst	51.9068	0.0862	30.0236	0.6839	0.1142	12.4908	3.8931	0.2089	99.4076	63.9392
JS30_plag20	68 / 1 .	Phenocryst	50.4275	0.0881	30.7317	0.6483	0.1155	13.743	3.2729	0.1479	99.175	69.8842
JS30_plag20	68 / 2 .	Phenocryst	49.7525	0.0821	30.8263	0.573	0.1105	14.0557	3.2169	0.1574	98.7743	70.7143
JS30_plag20	68 / 3 .	Phenocryst	50.2009	0.0706	30.8651	0.6616	0.1113	13.9524	3.2847	0.1741	99.3206	70.1262
JS30_plag20	68 / 4 .	Phenocryst	52.506	0.1318	29.0428	1.2513	0.117	11.9639	4.1908	0.3492	99.5528	61.2051
JS30_plag21	69 / 1 .	Phenocryst	48.1041	0.0909	28.2061	0.6089	0.119	12.6356	4.0546	0.1908	94.01	63.2651
JS30_plag21	69 / 2 .	Phenocryst	51.2036	0.0772	30.3343	0.7166	0.1598	13.1808	3.5666	0.2	99.4388	67.1304
JS30_plag21	69 / 3 .	Phenocryst	52.2523	0.1068	30.5956	0.6662	0.1297	13.0077	3.8167	0.1817	100.757	65.3191
JS30_plag21	69 / 4 .	Phenocryst	49.9068	0.0969	30.5951	0.667	0.1162	13.8512	3.2275	0.1359	98.5966	70.3413
JS30_plag21	69 / 5 .	Phenocryst	50.6124	0.088	30.903	0.6632	0.1249	13.5168	3.4154	0.1656	99.4893	68.6235
JS30_plag22	70 / 1 .	Microphenocryst	51.893	0.0822	29.9251	0.665	0.0932	12.721	3.8298	0.2394	99.4485	64.7343
JS30_plag22	70 / 2 .	Microphenocryst	53.2792	0.0751	29.2311	0.7272	0.1138	11.6047	4.5461	0.2675	99.8447	58.5181
JS30_plag22	70 / 3 .	Microphenocryst	51.4853	0.0806	30.6223	0.6783	0.1094	13.3062	3.7953	0.1847	100.262	65.9576
JS30_plag22	70 / 4 .	Microphenocryst	49.5413	0.0802	30.6066	0.5885	0.1189	13.9934	3.1942	0.1422	98.2652	70.7689
JS30_plag22	70 / 5 .	Microphenocryst	50.0032	0.0987	30.6177	0.8277	0.1224	13.8281	3.385	0.1647	99.0473	69.3022
NMSB13_plag1	71 / 1 .	Megaphenocryst	51.2918	0.0957	30.6969	0.5848	0.1339	13.3979	3.3806	0.2027	99.7842	68.6538
NMSB13_plag1	71 / 2 .	Megaphenocryst	51.9523	0.0732	30.2257	0.503	0.1419	12.9287	3.6573	0.218	99.7002	66.1428
NMSB13_plag1	71 / 3 .	Megaphenocryst	52.7943	0.0762	29.9888	0.6079	0.1406	12.2466	3.9406	0.2548	100.05	63.2011
NMSB13_plag1	71 / 4 .	Megaphenocryst	52.6445	0.0716	30.1819	0.5631	0.1414	12.7723	3.8168	0.2307	100.422	64.9036
NMSB13_plag1	71 / 5 .	Megaphenocryst	51.2	0.0824	30.8982	0.5352	0.1285	13.7194	3.3007	0.1806	100.045	69.6696
NMSB13_plag1	71 / 6 .	Megaphenocryst	51.3979	0.0759	30.717	0.5362	0.1265	13.3293	3.4454	0.2301	99.8582	68.1324
NMSB13_plag1	71 / 7 .	Megaphenocryst	50.7509	0.0688	31.073	0.5019	0.13	13.7016	3.3067	0.1596	99.6925	69.6038
NMSB13_plag1	71 / 8 .	Megaphenocryst	50.8525	0.0682	30.69	0.5572	0.1263	13.4625	3.4542	0.1753	99.386	68.2927
NMSB13_plag1	71 / 9 .	Megaphenocryst	50.9987	0.0689	30.7267	0.5485	0.1325	13.4846	3.4161	0.1856	99.5616	68.5677
NMSB13_plag1	71 / 10 .	Megaphenocryst	51.872	0.0604	30.2514	0.5525	0.1465	13.0014	3.8009	0.2293	99.9143	65.402
NMSB13_plag1	71 / 11 .	Megaphenocryst	50.9653	0.0754	31.05	0.5257	0.138	13.7014	3.3737	0.185	100.014	69.1774
NMSB13_plag1	71 / 12 .	Megaphenocryst	51.6292	0.0748	30.2278	0.481	0.1337	13.1547	3.5981	0.1978	99.4971	66.8922
NMSB13_plag1	71 / 13 .	Megaphenocryst	52.1761	0.0726	30.2506	0.544	0.133	12.9096	3.8094	0.1952	100.09	65.1908
NMSB13_plag1	71 / 14 .	Megaphenocryst	51.4741	0.0906	30.5192	0.6258	0.1496	13.2733	3.5799	0.2108	99.9234	67.2025
NMSB13_plag2	72 / 1 .	Phenocryst	51.2191	0.0841	30.7962	0.5739	0.1488	13.2029	3.4856	0.1986	99.7093	67.6719
NMSB13_plag2	72 / 2 .	Phenocryst	52.6922	0.07	30.3475	0.614	0.1635	12.5645	4.0388	0.2092	100.7	63.2247
NMSB13_plag2	72 / 3 .	Phenocryst	51.1694	0.0846	30.981	0.6434	0.1524	13.6482	3.3935	0.1605	100.233	68.9693
NMSB13_plag2	72 / 4 .	Phenocryst	51.0797	0.1024	30.8922	0.6825	0.1498	13.3738	3.4061	0.1639	99.8505	68.453
NMSB13_plag3	73 / 1 .	Groundmass	52.0524	0.113	29.9682	0.7874	0.139	12.5842	3.8576	0.2169	99.7186	64.3213
NMSB13_plag3	73 / 2 .	Groundmass	53.8143	0.1196	28.4049	0.9828	0.1998	11.3823	4.3975	0.3403	99.6416	58.8547
NMSB13_plag4	74 / 1 .	Groundmass	50.8896	0.1104	30.5202	0.7919	0.1361	13.4194	3.5373	0.1771	99.582	67.7056
NMSB13_plag4	74 / 2 .	Groundmass	55.4891	0.1335	27.955	0.9239	0.1025	10.3017	5.1972	0.3595	100.462	52.2766
NMSB13_plag5	75 / 1 .	Phenocryst	51.3842	0.0949	30.4834	0.7858	0.1982	13.4593	3.4471	0.1794	100.032	68.3321
NMSB13_plag5	75 / 2 .	Phenocryst	51.2242	0.0675	31.0733	0.578	0.1284	13.789	3.4298	0.1823	100.473	68.9612
NMSB13_plag5	75 / 3 .	Phenocryst	51.0654	0.0775	30.7164	0.5809	0.1367	13.6016	3.442	0.1788	99.7992	68.5911
NMSB13_plag5	75 / 4 .	Phenocryst	50.7516	0.0729	30.8111	0.5818	0.1475	13.6865	3.4064	0.1932	99.6509	68.9481
NMSB13_plag5	75 / 5 .	Phenocryst	51.0344	0.0941	30.5717	0.5571	0.1447	13.6041	3.4116	0.1896	99.6074	68.7859
NMSB13_plag5	75 / 6 .	Phenocryst	51.8941	0.0872	31.2833	0.5913	0.1373	13.8247	3.5669	0.2052	101.59	68.1722
NMSB13_plag5	75 / 7 .	Phenocryst	51.7454	0.0681	30.5515	0.56	0.1463	13.3531	3.6182	0.1798	100.222	67.1
NMSB13_plag5	75 / 8 .	Phenocryst	51.3434	0.1127	30.501	0.6991	0.1548	13.2999	3.5901	0.2225	99.9236	67.1839
NMSB13_plag6	76 / 1 .	Phenocryst	52.1082	0.0786	29.541	0.5016	0.1343	12.4739	4.0015	0.197	99.0362	63.2721
NMSB13_plag6	76 / 2 .	Phenocryst	52.6176	0.0711	29.7854	0.5236	0.142	12.3377	4.0101	0.2336	99.7211	62.9666
NMSB13_plag6	76 / 3 .	Phenocryst	51.3404	0.0742	30.2519	0.5665	0.1498	13.1542	3.6472	0.2233	99.4076	66.5905
NMSB13_plag6	76 / 4 .	Phenocryst	50.5174	0.091	30.1706	0.6496	0.1555	13.4857	3.4722	0.1839	98.7259	68.2174
NMSB13_plag6	76 / 5 .	Phenocryst	52.6389	0.1198	30.1885	0.7626	0.1403	12.926	3.8663	0.1955	100.838	64.8826
NMSB13_plag7	77 / 1 .	Phenocryst	52.2619	0.0797	30.2564	0.5637	0.1583	13.0578	3.6796	0.2088	100.266	66.2291
NMSB13_plag7	77 / 2 .	Phenocryst	51.2331	0.073	30.2469	0.4981	0.1467	13.1718	3.6471	0.1863	99.2029	66.6208
NMSB13_plag7	77 / 3 .	Phenocryst	51.7045	0.0706	30.1811	0.6485	0.1868	13.0729	3.6304	0.2009	99.6956	66.5552
NMSB13_plag7	77 / 4 .	Phenocryst	51.036	0.0934	30.3452	0.6161	0.143	13.4268	3.5814	0.1974	99.4392	67.4462
NMSB13_plag7	77 / 5 .	Phenocryst	51.8577	0.0887	30.127	0.678	0.1372	13.0818	3.6351	0.2096	99.8151	66.5416
NMSB13_plag8	78 / 1 .	Groundmass	52.2796	0.0976	29.9337	0.827	0.1446	12.7803	3.8303	0.201	100.094	64.8374
NMSB13_plag8	78 / 2 .	Groundmass	51.3032	0.0928	30.0798	0.9735	0.1209	12.8823	3.7245	0.2179	99.395	65.6528
NMSB13_plag9	79 / 1 .	Groundmass	51.9888	0.1242	30.0656	0.7218	0.1414	12.7461	3.7913	0.2276	99.8069	65.0095
NMSB13_plag9	79 / 2 .	Groundmass	53.4538	0.1183	28.2232	0.9023	0.1265	11.2058	4.5933	0.3001	98.9233	57.4142
NMSB13_plag10	80 / 1 .	Megaphenocryst	50.8039	0.0707	31.165	0.6132	0.1358	13.79	3.2683	0.1681	100.015	69.9856
NMSB13_plag10	80 / 2 .	Megaphenocryst	51.7914	0.0755	30.4628	0.6361	0.1322	13.1629	3.6805	0.2086	100.15	66.4027
NMSB13_plag10	80 / 3 .	Megaphenocryst	51.0028	0.0939	30.2501	0.6123	0.1407	13.2047	3.6835	0.2159	99.2037	66.4552
NMSB13_plag10	80 / 4 .	Megaphenocryst	52.1149	0.0695	30.645	0.5972	0.1367	13.4872	3.5732	0.1914	100.815	67.5949
NMSB13_plag10	80 / 5 .	Megaphenocryst	51.9687	0.0732	30.2595	0.6029	0.137	12.9828	3.7678	0.2047	99.9966	65.5674
NMSB13_plag10	80 / 6 .	Megaphenocryst	52.4713	0.061	29.9879	0.5963	0.1334	12.786	3.8613	0.2443	100.142	64.6636
NMSB13_plag10	80 / 7 .	Megaphenocryst	52.201	0.0566	29.8989	0.6257	0.1462	12.8265	3.7791	0.2473	99.7813	65.2255
NMSB13_plag10	80 / 8 .	Megaphenocryst	51.3169	0.0724	30.7288	0.6304	0.1412	13.6323	3.4141	0.1782	100.114	68.8146
NMSB13_plag11	81 / 1 .	Phenocryst	50.944	0.0787	30.1049	0.6293	0.1512	13.1791	3.5828	0.1826	98.8526	67.0274
NMSB13_plag11	81 / 2 .	Phenocryst	51.4101	0.076	30.2303	0.5987	0.1531	13.4458	3.5358	0.1915	99.6412	67.7579
NMSB13_plag11	81 / 3 .	Phenocryst	51.4226	0.0755	30.5461	0.5892	0.1449	13.3699	3.4663	0.1865	99.801	68.0671
NMSB13_plag11	81 / 4 .	Phenocryst	51.4288	0.0713	29.9962	0.5673	0.1577	13.0581	3.662	0.2047	99.1461	66.3368
NMSB13_plag11	81 / 5 .	Phenocryst	51.6786	0.081	30.3337	0.5254	0.1343	13.2787	3.7408	0.2112	99.9837	66.2354
NMSB13_plag11	81 / 6 .	Phenocryst	52.9161	0.283	28.4583	1.4382	0.2	11.7905	4.174	0.3309	99.5909	60.9535
NMSB13_plag12	82 / 1 .	Microphenocryst	52.278	0.084	29.7338	0.5603	0.137	12.6134	3.8735	0.2376	99.5177	64.2801
NMSB13_plag12	82 / 2 .	Microphenocryst	52.1119	0.0656	29.6333	0.6167	0.1503	12.7329	3.8653	0.223	99.399	64.5448
NMSB13_plag12	82 / 3 .	Microphenocryst	51.6618	0.1131	29.6408	0.7446	0.165	12.7531	3.8789	0.228	99.1851	64.5007
NMSB13_plag12	82 / 4 .	Microphenocryst	52.2037	0.1011	29.7763	0.6978	0.1552	13.0073	3.805	0.2209	99.9675	65.3879
NMSB13_plag13	83 / 1 .	Groundmass	51.6852	0.1229	30.1847	0.948	0.1178	13.1004	3.6377	0.2552	100.052	66.5573
NMSB13_plag13	83 / 2 .	Groundmass	61.0604	0.1457	23.7978	0.7721	0.066	5.4672	7.4413	0.9691	99.7197	28.8775
NMSB13_plag14	84 / 1 .	Groundmass	53.9509	0.1785	28.2589	1.2159	0.2889	11.2853	4.3909	0.5853	100.154	58.6837
NMSB13_plag14	84 / 2 .	Groundmass	53.6092	0.1257	28.5202	0.9425	0.1409	11.1611	4.6111	0.3271	99.4377	57.2218
NMSB13_plag15	85 / 1 .	Phenocryst	51.9532	0.0835	30.3335	0.5911	0.1454	13.2872	3.548	0.2179	100.16	67.4225
NMSB13_plag15	85 / 2 .	Phenocryst	50.8052	0.0966	27.8746	0.979	0.5729	11.4225	3.6519	0.2457	95.6484	63.3503
NMSB13_plag15	85 / 3 .	Phenocryst	53.1397	0.0797	29.6567	0.5826	0.1436	12.4183	3.9286	0.2241	100.173	63.595
NMSB13_plag15	85 / 4 .	Phenocryst	51.479	0.0813	30.2391	0.5767	0.1397	13.4191	3.5891	0.2074	99.7314	67.3865
NMSB13_plag15	85 / 5 .	Phenocryst	52.0551	0.108	29.6608	0.6955	0.1433	12.55	3.9231	0.2614	99.3971	63.8712
NMSB13_plag16	86 / 1 .	Groundmass	52.3847	0.1107	29.9646	0.6267	0.1518	12.8913	3.8809	0.2066	100.217	64.7353
NMSB13_plag16	86 / 2 .	Groundmass	51.3587	0.0943	30.4118	0.6675	0.1501	13.2167	3.7094	0.1751	99.7835	66.3192
NMSB13_plag16	86 / 3 .	Groundmass	51.6135	0.0938	29.811	0.6951	0.1486	12.9021	3.7863	0.2156	99.266	65.3156
NMSB13_plag17	87 / 1 .	Groundmass	51.469	0.1007	29.7029	0.7694	0.1276	12.8625	3.7729	0.2267	99.0317	65.3262
NMSB13_plag17	87 / 2 .	Groundmass	53.8564	0.1483	28.3834	0.9196	0.1168	11.2883	4.5406	0.2979	99.5513	57.8751
NMSB13_plag18	88 / 1 .	Megaphenocryst	51.2864	0.0869	30.5462	0.5849	0.1486	13.4578	3.3527	0.1958	99.6592	68.9275
NMSB13_plag18	88 / 2 .	Megaphenocryst	50.4369	0.0761	30.9266	0.5924	0.1425	13.88	3.2413	0.16	99.4559	70.2956
NMSB13_plag18	88 / 3 .	Megaphenocryst	50.5544	0.0797	31.1834	0.6193	0.1326	14.0923	3.0865	0.1703	99.9184	71.6167
NMSB13_plag18	88 / 4 .	Megaphenocryst	50.6813	0.0819	30.8586	0.6461	0.1496	13.758	3.3462	0.1784	99.7003	69.4392
NMSB13_plag18	88 / 5 .	Megaphenocryst	51.127	0.0859	30.5875	0.5772	0.1454	13.5858	3.3119	0.1941	99.6147	69.3906
NMSB13_plag18	88 / 6 .	Megaphenocryst	51.0924	0.0868	30.2929	0.6347	0.1443	13.4196	3.4749	0.1831	99.3287	68.0939
NMSB13_plag18	88 / 7 .	Megaphenocryst	51.532	0.0871	30.2673	0.6367	0.1408	13.3313	3.5735	0.1955	99.7641	67.3379
NMSB13_plag18	88 / 8 .	Megaphenocryst	50.7807	0.0733	30.7441	0.5734	0.1321	13.8692	3.2832	0.1516	99.6076	70.0104
NMSB13_plag19	89 / 1 .	Microphenocryst	53.4359	0.113	28.4467	0.7189	0.1901	11.2558	4.6902	0.2999	99.1505	57.0122
NMSB13_plag19	89 / 2 .	Microphenocryst	51.4142	0.0919	30.1983	0.6129	0.1476	13.2197	3.4849	0.2029	99.3723	67.7041
NMSB13_plag19	89 / 3 .	Microphenocryst	52.822	0.0968	29.2505	0.7798	0.1477	12.1226	4.2419	0.2606	99.7219	61.2302
NMSB13_plag20	90 / 1 .	Microphenocryst	51.114	0.09	30.6599	0.5875	0.1469	13.7123	3.4596	0.1567	99.9269	68.6559
NMSB13_plag20	90 / 2 .	Microphenocryst	50.976	0.0705	30.1611	0.6019	0.1756	13.3142	3.2153	0.4025	98.9171	69.59
NMSB13_plag20	90 / 3 .	Microphenocryst	51.5267	0.0908	29.994	0.7278	0.1361	12.8921	3.7313	0.1994	99.2981	65.6288
NMSB13_plag21	91 / 1 .	Microphenocryst	51.1722	0.101	30.1308	0.6179	0.1643	13.0843	3.5367	0.198	99.0052	67.154
NMSB13_plag21	91 / 2 .	Microphenocryst	52.3345	0.0966	29.9681	0.5864	0.14	12.9443	3.6782	0.2039	99.952	66.0421
NMSB13_plag21	91 / 3 .	Microphenocryst	51.3319	0.0926	29.9251	0.7243	0.1776	12.8283	3.6724	0.2126	98.9649	65.8754
NMSB13_plag21	91 / 4 .	Microphenocryst	50.9999	0.0779	30.3718	0.6504	0.1467	13.4672	3.4909	0.1831	99.3879	68.071
NMSB55_plag1	1 / 1 .	Phenocryst	50.5329	0.0695	30.1977	0.6185	0.1048	13.1139	3.6206	0.1538	98.4116	66.685
NMSB55_plag1	2 / 1 .	Phenocryst	51.184	0.0679	30.6323	0.4882	0.1175	13.2581	3.4558	0.1788	99.3825	67.9504
NMSB55_plag1	2 / 2 .	Phenocryst	50.9591	0.0758	30.6411	0.6602	0.1224	13.4053	3.3531	0.1478	99.3647	68.8412
NMSB55_plag2	1 / 1 .	Microphenocryst	51.9315	0.0638	30.656	0.7096	0.0779	13.5592	3.4465	0.1957	100.64	68.4957
NMSB55_plag2	1 / 2 .	Microphenocryst	51.02	0.0636	30.02	1.5224	0.9602	13.158	3.3685	0.1792	100.292	68.3413
NMSB55_plag2	1 / 3 .	Microphenocryst	51.8638	0.0788	29.6621	1.2426	0.4385	12.9607	3.5979	0.2479	100.092	66.5635
NMSB55_plag3	3 / 1 .	Microphenocryst	51.7356	0.0525	30.6415	0.6459	0.0819	13.6979	3.2709	0.1851	100.311	69.8279
NMSB55_plag3	3 / 2 .	Microphenocryst	50.3775	0.0635	30.7129	0.6895	0.09	13.8091	3.2462	0.2073	99.196	70.1569
NMSB55_plag3	3 / 3 .	Microphenocryst	51.373	0.0723	30.2103	0.8295	0.0791	13.321	3.4837	0.2044	99.5734	67.8783
NMSB55_plag4	4 / 1 .	Microphenocryst	51.1791	0.0878	30.6555	0.8114	0.0698	13.6746	3.2236	0.1773	99.8791	70.0982
NMSB55_plag4	4 / 2 .	Microphenocryst	50.4576	0.0781	30.5388	1.475	0.7291	13.749	2.9421	0.1535	100.123	72.087
NMSB55_plag4	4 / 3 .	Microphenocryst	50.0824	0.0986	31.0571	0.9138	0.0623	13.8197	3.3023	0.1461	99.4825	69.8131
NMSB55_plag5	5 / 1 .	Phenocryst	53.405	0.0848	29.6536	0.5978	0.1216	12.3468	4.0774	0.1825	100.469	62.5949
NMSB55_plag5	5 / 2 .	Phenocryst	52.6901	0.0654	29.7488	0.4474	0.1702	12.1592	4.177	0.227	99.6851	61.6669
NMSB55_plag5	5 / 3 .	Phenocryst	54.6526	0.1196	28.4244	0.8053	0.1076	11.3556	4.5614	0.3327	100.359	57.9085
NMSB55_plag6	6 / 1 .	Microphenocryst	51.8419	0.0605	30.4852	0.5929	0.0744	12.976	3.8169	0.2059	100.054	65.2626
NMSB55_plag6	6 / 2 .	Microphenocryst	52.5337	0.0782	30.0931	0.6157	0.075	12.6379	3.9978	0.2359	100.267	63.5965
NMSB55_plag6	6 / 3 .	Microphenocryst	52.727	0.1177	29.6092	0.9246	0.0931	12.5892	4.0679	0.2606	100.389	63.1033
NMSB55_plag7	7 / 1 .	Microphenocryst	53.0113	0.0721	29.8542	0.5758	0.1877	12.4974	3.9287	0.166	100.293	63.7412
NMSB55_plag7	7 / 2 .	Microphenocryst	52.5126	0.0696	29.64	0.8583	0.3197	12.2719	4.0288	0.2036	99.9045	62.7331
NMSB55_plag7	7 / 3 .	Microphenocryst	53.3902	0.0561	29.8822	0.7042	0.0932	12.5075	4.0654	0.2011	100.9	62.9659
NMSB55_plag8	8 / 1 .	Microphenocryst	52.77	0.0659	29.8689	0.5578	0.0838	12.2547	3.9305	0.2078	99.7393	63.2761
NMSB55_plag8	8 / 2 .	Microphenocryst	52.5206	0.0456	29.395	0.7965	0.4362	12.1447	3.9144	0.211	99.464	63.1619
NMSB55_plag8	8 / 3 .	Microphenocryst	60.042	0.1624	25.0426	0.6595	0.0366	6.6577	6.6488	0.7834	100.033	35.624
NMSB55_plag9	9 / 1 .	Phenocryst	52.21	0.0712	30.4227	0.572	0.1244	13.2002	3.5195	0.1885	100.308	67.4553
NMSB55_plag9	9 / 2 .	Phenocryst	51.66	0.0582	30.6206	0.4958	0.139	13.4958	3.5135	0.1692	100.152	67.9768
NMSB55_plag9	9 / 3 .	Phenocryst	51.9803	0.0588	30.6333	0.6015	0.1117	13.3792	3.4948	0.1718	100.431	67.904
NMSB55_plag10	10 / 1 .	Microphenocryst	51.743	0.0717	30.1899	0.842	0.2398	12.8834	3.7616	0.184	99.9154	65.4309
NMSB55_plag10	10 / 2 .	Microphenocryst	50.7328	0.0532	31.1927	0.6849	0.0679	13.9675	3.2658	0.1739	100.139	70.2696
NMSB55_plag10	10 / 3 .	Microphenocryst	50.6723	0.074	31.0437	0.8902	0.0893	14.0345	3.1786	0.1952	100.178	70.9306
NMSB61_plag1	11 / 1 .	Phenocryst	53.0945	0.0786	29.7169	0.6148	0.1381	12.6273	3.9435	0.2972	100.511	63.8932
NMSB61_plag1	11 / 2 .	Phenocryst	53.5708	0.0762	29.8074	0.5778	0.1212	12.4521	4.0538	0.2919	100.951	62.929
NMSB61_plag1	11 / 3 .	Phenocryst	52.6991	0.082	29.9474	0.6205	0.1323	12.753	3.8866	0.2784	100.399	64.4551
NMSB61_plag1	11 / 4 .	Phenocryst	52.0911	0.0887	30.3202	0.6271	0.1298	13.141	3.7318	0.2316	100.361	66.0559
NMSB61_plag2	12 / 1 .	Megaphenocryst	52.4727	0.0848	30.6616	0.5149	0.104	13.2079	3.5238	0.2694	100.839	67.4413
NMSB61_plag2	12 / 2 .	Megaphenocryst	52.0517	0.08	30.5501	0.5767	0.096	13.1012	3.6091	0.2561	100.321	66.7341
NMSB61_plag2	12 / 3 .	Megaphenocryst	54.6045	0.0899	28.4923	0.7037	0.1336	11.2111	4.5806	0.3928	100.208	57.4935
NMSB61_plag2	12 / 4 .	Megaphenocryst	52.8728	0.068	30.0321	0.632	0.142	12.8966	3.8649	0.267	100.775	64.8389
NMSB61_plag3	13 / 1 .	Megaphenocryst	54.3773	0.1305	28.6527	0.6617	0.1138	11.5728	4.3282	0.3587	100.196	59.639
NMSB61_plag3	13 / 2 .	Megaphenocryst	54.9074	0.1266	28.4176	0.6656	0.148	11.2831	4.6121	0.3483	100.509	57.4824
NMSB61_plag3	13 / 3 .	Megaphenocryst	54.1223	0.0977	28.9992	0.5437	0.143	11.6647	4.3768	0.3269	100.274	59.5606
NMSB61_plag3	13 / 4 .	Megaphenocryst	52.7583	0.1044	29.4999	0.6159	0.1457	12.2614	4.0335	0.2984	99.7174	62.6858
NMSB61_plag3	13 / 5 .	Megaphenocryst	52.994	0.0824	30.0934	0.5836	0.1422	13.0509	3.704	0.2367	100.887	66.0693
NMSB61_plag4	14 / 1 .	Phenocryst	51.7498	0.1066	30.2261	0.553	0.1364	13.1645	3.6632	0.2555	99.855	66.5104
NMSB61_plag4	14 / 2 .	Phenocryst	52.2993	0.0797	29.9224	0.6501	0.1326	12.8302	3.8327	0.2596	100.007	64.9119
NMSB61_plag4	14 / 3 .	Phenocryst	54.6365	0.1274	28.0522	0.8225	0.1886	10.6431	4.8604	0.4159	99.7468	54.7538
NMSB61_plag5	15 / 1 .	Megaphenocryst	52.3083	0.0649	29.9903	0.69	0.1637	12.9708	3.7351	0.2351	100.158	65.7431
NMSB61_plag5	15 / 2 .	Megaphenocryst	53.8829	0.1209	28.8482	0.6236	0.1386	11.7773	4.3054	0.3187	100.016	60.1865
NMSB61_plag5	15 / 3 .	Megaphenocryst	50.9039	0.0711	30.6545	0.569	0.1261	13.4682	3.4707	0.2301	99.4936	68.1986
NMSB61_plag6	16 / 1 .	Megaphenocryst	55.7889	0.0964	28.3214	0.6676	0.1165	10.8835	4.5845	0.4403	100.899	56.7463
NMSB61_plag6	16 / 2 .	Megaphenocryst	53.4849	0.1171	28.9791	0.6549	0.1282	11.8081	4.3789	0.3446	99.8957	59.843
NMSB61_plag6	16 / 3 .	Megaphenocryst	53.6597	0.1108	28.6297	0.7006	0.1387	11.4633	4.4887	0.3739	99.5654	58.529
NMSB61_plag6	16 / 4 .	Megaphenocryst	52.3461	0.0877	29.7206	0.6719	0.1403	12.1501	4.0626	0.304	99.4833	62.3036
NMSB61_plag6	16 / 5 .	Megaphenocryst	51.9546	0.0711	29.9599	0.6224	0.1267	12.7825	3.7806	0.263	99.5607	65.1385
NMSB61_plag7	17 / 1 .	Megaphenocryst	53.5516	0.1016	28.8976	0.6264	0.1278	11.7171	4.3401	0.3608	99.723	59.8709
NMSB61_plag7	17 / 2 .	Megaphenocryst	55.0144	0.0874	28.401	0.5904	0.1103	11.1452	4.5231	0.4472	100.319	57.658
NMSB61_plag7	17 / 3 .	Megaphenocryst	52.6094	0.1109	29.4091	0.6082	0.1115	12.4907	3.949	0.3209	99.6099	63.6096
NMSB61_plag7	17 / 4 .	Megaphenocryst	53.3405	0.1118	29.091	0.6112	0.117	11.7187	4.35	0.3701	99.7103	59.8195
NMSB61_plag7	17 / 5 .	Megaphenocryst	53.7064	0.0916	29.169	0.6084	0.1391	12.1279	4.0954	0.3045	100.242	62.0715
NMSB61_plag8	18 / 1 .	Phenocryst	53.643	0.0863	29.2381	0.5294	0.1117	11.9568	4.0818	0.3475	99.9945	61.8149
NMSB61_plag8	18 / 2 .	Phenocryst	52.6535	0.0861	29.7601	0.5398	0.0946	12.3723	3.9143	0.3008	99.7215	63.5935
NMSB61_plag8	18 / 3 .	Phenocryst	52.6053	0.1103	29.5682	0.4998	0.1008	12.4797	3.853	0.2986	99.5158	64.1571
NMSB61_plag8	18 / 4 .	Phenocryst	47.7899	0.0765	26.3611	0.9935	0.399	10.84	3.5223	0.2882	90.2706	62.9732
NMSB64_plag1	19 / 1 .	Microphenocryst	46.0184	0.0571	28.501	0.1457	0	14.6187	0.6413	0.213	90.1952	92.6457
NMSB64_plag2	20 / 1 .	Microphenocryst	48.9438	0.0674	31.9045	0.9431	0.2586	14.8551	2.7156	0.1437	99.8319	75.1433
NMSB64_plag2	20 / 2 .	Microphenocryst	48.3824	0.6238	30.9321	1.4172	0.3188	13.9435	2.6445	0.686	98.9482	74.4496
NMSB64_plag3	21 / 1 .	Microphenocryst	49.8948	0.0633	32.3917	0.5527	0.0289	15.4574	2.5427	0.1289	101.06	77.0617
NMSB64_plag3	21 / 2 .	Microphenocryst	50.0814	0.0646	32.0041	0.6345	0.0312	14.6355	2.9371	0.1719	100.56	73.36
NMSB64_plag3	21 / 3 .	Microphenocryst	47.1951	0.0738	31.1389	0.6876	0.0548	14.1557	3.0221	0.1976	96.5254	72.1337
NMSB64_plag4	22 / 1 .	Microphenocryst	49.3303	0.0671	32.36	0.5165	0.0523	15.3439	2.726	0.1269	100.523	75.6728
NMSB64_plag4	22 / 2 .	Microphenocryst	49.0641	0.0492	32.5269	0.5821	0.0443	15.2541	2.6113	0.0902	100.222	76.3495
NMSB64_plag4	22 / 3 .	Microphenocryst	49.134	0.0467	32.3722	0.6268	0.0466	15.2356	2.7106	0.1232	100.296	75.6466
NMSB64_plag5	23 / 1 .	Phenocryst	49.3053	0.0709	32.1797	0.622	0.0568	15.1953	2.6643	0.1446	100.239	75.9142
NMSB64_plag5	23 / 2 .	Phenocryst	50.1411	0.0631	31.9699	0.5157	0.083	14.8731	2.7797	0.1335	100.559	74.7279
NMSB64_plag5	23 / 3 .	Phenocryst	49.6087	0.0597	32.3615	0.6126	0.0399	15.0097	2.6952	0.1463	100.534	75.476
NMSB64_plag6	24 / 1 .	Microphenocryst	48.9299	0.0426	32.6516	0.4623	0.0344	15.6852	2.3978	0.1007	100.305	78.3317
NMSB64_plag6	24 / 2 .	Microphenocryst	50.3274	0.0716	31.6586	0.6678	0.0406	14.1505	3.0696	0.1791	100.165	71.8117
NMSB64_plag7	25 / 1 .	Phenocryst	51.5028	0.0764	30.6448	0.6499	0.0959	13.5893	3.4977	0.1582	100.215	68.2247
NMSB64_plag7	25 / 2 .	Phenocryst	51.7926	0.0793	30.5135	0.6339	0.1147	13.5538	3.5443	0.1656	100.398	67.8801
NMSB64_plag7	25 / 3 .	Phenocryst	50.7532	0.1052	30.6774	0.6252	0.115	13.6519	3.3943	0.1788	99.5009	68.9701
NMSB68_plag1	26 / 1 .	Megaphenocryst	52.2127	0.0947	30.139	0.6367	0.1205	13.1229	3.5321	0.2519	100.111	67.2476
NMSB68_plag1	26 / 2 .	Megaphenocryst	51.4922	0.0839	29.8663	0.6329	0.1178	13.0587	3.5489	0.2326	99.0333	67.0347
NMSB68_plag1	26 / 3 .	Megaphenocryst	52.905	0.0852	29.6451	0.5893	0.1173	12.4887	3.9446	0.2969	100.072	63.6317
NMSB68_plag1	26 / 4 .	Megaphenocryst	52.2511	0.0892	30.0168	0.6301	0.1177	12.8525	3.6138	0.2668	99.838	66.2782
NMSB68_plag1	26 / 5 .	Megaphenocryst	51.8861	0.089	30.0642	0.6025	0.1168	12.9663	3.6708	0.2453	99.641	66.1253
NMSB68_plag1	26 / 6 .	Megaphenocryst	52.7165	0.0885	29.9038	0.5626	0.1039	12.6753	3.8225	0.2429	100.116	64.6957
NMSB68_plag1	26 / 7 .	Megaphenocryst	53.0483	0.0968	29.8721	0.5817	0.1216	12.6837	3.7373	0.2453	100.387	65.2238
NMSB68_plag1	26 / 8 .	Megaphenocryst	53.0446	0.1112	28.7711	0.7159	0.1031	11.6282	4.2766	0.3216	98.9723	60.042
NMSB68_plag2	27 / 1 .	Megaphenocryst	52.3083	0.1104	29.6741	0.5503	0.116	12.6796	3.7723	0.2707	99.4816	65.0048
NMSB68_plag2	27 / 2 .	Megaphenocryst	51.7597	0.0893	29.6823	0.6121	0.1103	12.79	3.7917	0.2581	99.0933	65.0852
NMSB68_plag2	27 / 3 .	Megaphenocryst	53.81	0.1164	28.4127	0.7502	0.1146	11.3135	4.3764	0.3843	99.2781	58.8244
NMSB68_plag3	28 / 1 .	Phenocryst	51.8215	0.0908	30.0421	0.6757	0.137	12.8384	3.6947	0.2312	99.5315	65.7569
NMSB68_plag3	28 / 2 .	Phenocryst	52.2405	0.0849	29.9249	0.5693	0.1341	12.8198	3.8236	0.2449	99.8418	64.9476
NMSB68_plag3	28 / 3 .	Phenocryst	53.3329	0.1128	29.2633	0.7301	0.1095	12.1226	4.1948	0.3409	100.207	61.4949
NMSB68_plag4	29 / 1 .	Microphenocryst	52.9774	0.0938	29.837	0.6035	0.1152	12.5495	3.9486	0.3282	100.453	63.7206
NMSB68_plag4	29 / 2 .	Microphenocryst	52.6367	0.0944	29.3027	1.2413	0.1577	12.2884	3.9154	0.2762	99.9128	63.4293
NMSB68_plag4	29 / 3 .	Microphenocryst	54.0962	0.1411	27.9119	0.8226	0.0904	10.6944	4.726	0.4273	98.91	55.5663
NMSB68_plag5	30 / 1 .	Megaphenocryst	52.8674	0.0783	29.9206	0.5817	0.1036	12.8135	3.8876	0.2526	100.505	64.5575
NMSB68_plag5	30 / 2 .	Megaphenocryst	52.5502	0.0933	30.4078	0.5578	0.1042	13.0584	3.6908	0.2512	100.714	66.1621
NMSB68_plag5	30 / 3 .	Megaphenocryst	52.7111	0.1087	30.0384	0.5721	0.1151	12.8832	3.7224	0.2705	100.421	65.6671
NMSB68_plag5	30 / 4 .	Megaphenocryst	55.042	0.1174	28.2538	0.6685	0.0815	10.8754	4.7625	0.4039	100.205	55.7906
NMSB68_plag6	31 / 1 .	Microphenocryst	54.1283	0.1268	28.185	1.1126	0.2723	11.2068	4.4257	0.3698	99.8273	58.3226
NMSB68_plag6	31 / 2 .	Microphenocryst	52.6923	0.0929	29.366	0.7072	0.0953	12.3784	4.0081	0.2988	99.6389	63.0549
NMSB68_plag6	31 / 3 .	Microphenocryst	52.6479	0.1018	29.9617	0.7138	0.0873	12.657	3.9255	0.2841	100.379	64.0528
NMSB68_plag7	32 / 1 .	Microphenocryst	53.1225	0.1344	28.7005	0.7596	0.1944	11.6325	4.3072	0.3792	99.2303	59.8797
NMSB68_plag7	32 / 2 .	Microphenocryst	51.6172	0.0955	29.8329	0.6852	0.0954	12.7689	3.9363	0.2805	99.3119	64.1921
NMSB68_plag7	32 / 3 .	Microphenocryst	52.0607	0.0981	29.8552	0.7356	0.0761	12.7105	3.873	0.2725	99.6817	64.4589
NMSB68_plag8	33 / 1 .	Microphenocryst	52.062	0.1051	30.0954	0.7186	0.0702	12.7529	3.7485	0.2881	99.8407	65.2794
NMSB68_plag8	33 / 2 .	Microphenocryst	51.7238	0.1012	29.8805	0.6681	0.0944	12.7989	3.8154	0.2512	99.3335	64.9593
NMSB68_plag8	33 / 3 .	Microphenocryst	54.6402	0.106	28.4931	0.7875	0.0894	10.903	4.6983	0.3783	100.096	56.1875
Notes
On any given grain, point 1 = core analysis, 2 = midpoint analysis, 3 = rim analysis. Where only 2 points are analyzed, 1 = core and 2 = rim. Where more than 3 points are analyzed, 1 = core, final point = rim, and all others are midpoints increasingly farther from the core.
Bolded An (anorthite) content indicates a core analysis. An stoichiometry calculated separately.
Red text indicates an erroneous analysis (not plagioclase or off grain). These data were not used for any plots, calculations or models.
Orange text indicates low or high total. These data were not used for any plots, calculations or models.
												An
												87.6862
												65.9999
												63.4245
												73.2759
												67.9581
												67.2545
												64.2403
												65.3309
												67.5769
												66.0433
												73.7163
												68.9238
												68.5562
												46.1394
												67.7283
												45.723
												54.9566
												60.6795
												67.6849
												66.9221
												62.7744
												73.7005
												72.9228
												69.7967
												71.1642
												69.0072
												69.0243
												70.4722
												77.0317
												68.2547
												65.3171
												64.5611
												61.5156
												66.7181
												69.1208
												64.2996
												63.0268
												63.754
												65.7784
												65.1841
												73.0228
												71.2431
												65.5578
												72.8708
												65.4222
												62.1168
												61.3126
												63.5867
												73.7926
												56.6731
												67.699
												71.1133
												67.1126
												72.268
												59.4296
												42.055
												63.2946
												62.8984
												63.8269
												62.8232
												61.7527
												64.4718
												73.448
												74.0722
												70.7528
												73.4372
												71.4931
												71.0539
												73.4817
												68.7028
												71.204
												70.9869
												72.4959
												68.0867
												63.5066
												63.1272
												64.1991
												64.0621
												74.9697
												65.163
												64.195
												66.0048
												62.8377
												67.4953
												70.233
												69.1526
												67.0482
												65.6805
												70.4978
												69.9141
												68.3262
												66.3519
												69.5998
												68.6259
												68.2098
												67.3096
												62.1962
												61.1412
												62.1286
												48.077
												67.6339
												71.6868
												68.9488
												68.5897
												47.4257
												63.8306
												52.114
												52.4073
												50.7323
												63.7483
												57.7066
												71.2613
												71.4586
												71.8867
												70.4829
												68.1402
												70.46
												70.3087
												71.5972
												63.2643
												50.4445
												50.0808
												68.8411
												68.7676
												71.7153
												18.1774
												71.7162
												71.2932
												69.0754
												69.0966
												73.2954
												71.8927
												69.9551
												70.5233
												69.8669
												71.2065
												69.5086
												71.6515
												72.4591
												70.879
												65.6864
												69.8889
												71.4169
												69.3829
												70.504
												70.3644
												70.2623
												71.0564
												65.8462
												63.9179
												49.8398
												70.7178
												65.4997
												65.6787
												63.7599
												48.2381
												47.0986
												70.0072
												69.9936
												70.8777
												71.2732
												66.6849
												61.8508
												70.1053
												64.77
												60.5154
												66.1872
												42.6036
												63.7628
												63.2157
												67.9418
												67.3407
												66.402
												80.7125
												97.6218
												60.9296
												68.9828
												62.4682
												70.0226
												71.7687
												69.1989
												72.1921
												72.0817
												68.8053
												67.85
												68.4362
												59.1585
												56.9487
												62.0043
												72.2559
												72.1885
												72.794
												70.9021
												72.9085
												71.3652
												69.9272
												72.9622
												71.3676
												72.6845
												69.9278
												69.9602
												68.1748
												68.3007
												68.5342
												69.5797
												68.6862
												72.3692
												63.6873
												70.5147
												65.9066
												54.3883
												65.6718
												67.3515
												65.854
												66.5911
												67.251
												59.5141
												64.6215
												63.1638
												67.7846
												65.6675
												69.8129
												70.5545
												68.6257
												68.1942
												66.7983
												66.3293
												65.8107
												66.5116
												65.4943
												62.7066
												62.5027
												65.4109
												66.7184
												64.2321
												65.0971
												68.2014
												66.4712
												63.0382
												64.33
												63.789
												64.81
												65.8807
												64.8056
												64.7034
												62.7626
												63.6306
												63.6479
												61.7097
												62.4899
												58.1464
												61.9459
												65.2388
												64.4208
												61.5722
												63.5699
												64.3864
												62.0442
												58.8207
												61.7301
												64.8543
												65.5897
												62.9171
												59.4267
												60.0998
												58.3316
												57.5063
												5.70292
												55.819
												66.4805
												64.6007
												64.4845
												60.6226
												57.5703
												62.3317
												100
												59.9891
												63.2176
												57.3626
												63.1068
												63.1384
												63.1151
												62.0677
												55.8448
												61.1329
												62.4207
												61.1981
												58.4683
												65.1979
												63.0621
												66.1302
												65.4002
												63.9509
												64.9333
												64.5393
												65.0011
												63.439
												71.0104
												75.7575
												74.187
												72.61
												71.4466
												65.9977
												69.885
												68.6492
												67.6252
												70.5937
												71.2149
												69.1261
												69.2935
												55.3649
												70.0412
												70.0492
												69.6671
												71.7755
												70.4194
												70.9626
												73.8929
												70.5309
												50.599
												69.701
												71.172
												71.4734
												15.7817
												71.242
												70.1073
												66.0442
												73.7133
												73.907
												72.4715
												72.3518
												65.9521
												65.684
												62.7272
												68.0109
												67.0434
												59.388
												66.1629
												58.7123
												43.3005
												68.8214
												72.683
												69.4431
												67.9254
												72.0533
												70.5388
												72.5908
												73.3446
												66.7444
												68.9357
												54.5405
												72.4228
												65.8935
												66.6943
												70.7865
												70.7388
												75.8466
												70.735
												74.2709
												70.0462
												69.2254
												70.9741
												65.6955
												65.0174
												59.0619
												63.422
												67.6797
												66.7947
												66.8274
												66.8447
												68.7588
												65.7186
												68.0407
												64.6881
												68.4578
												66.9887
												64.1249
												69.1213
												66.4103
												69.4322
												66.7571
												64.735
												65.6919
												54.9513
												69.0388
												66.3626
												66.7975
												65.8639
												63.2786
												59.9909
												63.529
												63.0888
												68.5569
												69.602
												71.0643
												71.1051
												65.8882
												63.9746
												66.4466
												68.7115
												68.5267
												66.0407
												65.3731
												66.0995
												59.6967
												65.6544
												66.101
												56.1335
												66.5782
												68.3759
												65.9736
												69.6064
												60.4272
												66.3906
												67.1831
												61.8357
												66.0876
												70.8767
												64.3005
												69.7225
												69.4517
												67.6211
												70.7481
												64.0132
												70.0318
												64.1719
												69.7695
												67.4001
												65.8346
												70.8539
												64.8388
												65.3027
												63.4483
												64.9543
												43.0449
												72.4628
												65.158
												70.1363
												64.3743
												69.1155
												68.9977
												67.1661
												71.3754
												69.3266
												70.5592
												70.4322
												69.795
												67.0935
												71.8726
												70.7602
												70.2076
												67.9794
												64.9412
												31.4023
												67.0534
												62.6307
												59.1314
												68.5069
												65.9814
												67.9671
												35.7219
												61.4263
												35.2085
												32.5311
												67.4739
												68.6335
												64.6678
												67.0537
												66.894
												69.3266
												66.8446
												70.7458
												69.2758
												69.0243
												62.9231
												67.9538
												65.2227
												62.2794
												69.8295
												65.0415
												70.1725
												68.5969
												69.387
												69.6883
												65.0728
												48.5186
												65.7675
												65.1453
												55.0344
												63.5588
												68.5358
												68.6045
												67.7658
												67.0395
												66.4264
												65.524
												67.8735
												68.0205
												64.8903
												64.3016
												69.4275
												67.8714
												69.4669
												65.6943
												66.3434
												70.7041
												66.1811
												53.7425
												66.4659
												68.687
												65.5549
												61.87
												66.0149
												56.5632
												55.0999
												64.6838
												69.8471
												64.2075
												62.4489
												62.6505
												64.0572
												65.0198
												65.4143
												69.7924
												67.2228
												67.2676
												66.1045
												66.4661
												69.5793
												63.9552
												69.1017
												66.5777
												69.2119
												69.512
												68.8933
												65.3882
												63.9392
												69.8842
												70.7143
												70.1262
												61.2051
												63.2651
												67.1304
												65.3191
												70.3413
												68.6235
												64.7343
												58.5181
												65.9576
												70.7689
												69.3022
												68.6538
												66.1428
												63.2011
												64.9036
												69.6696
												68.1324
												69.6038
												68.2927
												68.5677
												65.402
												69.1774
												66.8922
												65.1908
												67.2025
												67.6719
												63.2247
												68.9693
												68.453
												64.3213
												58.8547
												67.7056
												52.2766
												68.3321
												68.9612
												68.5911
												68.9481
												68.7859
												68.1722
												67.1
												67.1839
												63.2721
												62.9666
												66.5905
												68.2174
												64.8826
												66.2291
												66.6208
												66.5552
												67.4462
												66.5416
												64.8374
												65.6528
												65.0095
												57.4142
												69.9856
												66.4027
												66.4552
												67.5949
												65.5674
												64.6636
												65.2255
												68.8146
												67.0274
												67.7579
												68.0671
												66.3368
												66.2354
												60.9535
												64.2801
												64.5448
												64.5007
												65.3879
												66.5573
												28.8775
												58.6837
												57.2218
												67.4225
												63.3503
												63.595
												67.3865
												63.8712
												64.7353
												66.3192
												65.3156
												65.3262
												57.8751
												68.9275
												70.2956
												71.6167
												69.4392
												69.3906
												68.0939
												67.3379
												70.0104
												57.0122
												67.7041
												61.2302
												68.6559
												69.59
												65.6288
												67.154
												66.0421
												65.8754
												68.071
												An
												87.6862
												65.9999
												63.4245
												73.2759
												67.9581
												67.2545
												64.2403
												65.3309
												67.5769
												66.0433
												73.7163
												68.9238
												68.5562
												46.1394
												67.7283
												45.723
												54.9566
												60.6795
												67.6849
												66.9221
												62.7744
												73.7005
												72.9228
												69.7967
												71.1642
												69.0072
												69.0243
												70.4722
												77.0317
												68.2547
												65.3171
												64.5611
												61.5156
												66.7181
												69.1208
												64.2996
												63.0268
												63.754
												65.7784
												65.1841
												73.0228
												71.2431
												65.5578
												72.8708
												65.4222
												62.1168
												61.3126
												63.5867
												73.7926
												56.6731
												67.699
												71.1133
												67.1126
												72.268
												59.4296
												42.055
												63.2946
												62.8984
												63.8269
												62.8232
												61.7527
												64.4718
												73.448
												74.0722
												70.7528
												73.4372
												71.4931
												71.0539
												73.4817
												68.7028
												71.204
												70.9869
												72.4959
												68.0867
												63.5066
												63.1272
												64.1991
												64.0621
												74.9697
												65.163
												64.195
												66.0048
												62.8377
												67.4953
												70.233
												69.1526
												67.0482
												65.6805
												70.4978
												69.9141
												68.3262
												66.3519
												69.5998
												68.6259
												68.2098
												67.3096
												62.1962
												61.1412
												62.1286
												48.077
												67.6339
												71.6868
												68.9488
												68.5897
												47.4257
												63.8306
												52.114
												52.4073
												50.7323
												63.7483
												57.7066
												71.2613
												71.4586
												71.8867
												70.4829
												68.1402
												70.46
												70.3087
												71.5972
												63.2643
												50.4445
												50.0808
												68.8411
												68.7676
												71.7153
												18.1774
												71.7162
												71.2932
												69.0754
												69.0966
												73.2954
												71.8927
												69.9551
												70.5233
												69.8669
												71.2065
												69.5086
												71.6515
												72.4591
												70.879
												65.6864
												69.8889
												71.4169
												69.3829
												70.504
												70.3644
												70.2623
												71.0564
												65.8462
												63.9179
												49.8398
												70.7178
												65.4997
												65.6787
												63.7599
												48.2381
												47.0986
												70.0072
												69.9936
												70.8777
												71.2732
												66.6849
												61.8508
												70.1053
												64.77
												60.5154
												66.1872
												42.6036
												63.7628
												63.2157
												67.9418
												67.3407
												66.402
												80.7125
												97.6218
												60.9296
												68.9828
												62.4682
												70.0226
												71.7687
												69.1989
												72.1921
												72.0817
												68.8053
												67.85
												68.4362
												59.1585
												56.9487
												62.0043
												72.2559
												72.1885
												72.794
												70.9021
												72.9085
												71.3652
												69.9272
												72.9622
												71.3676
												72.6845
												69.9278
												69.9602
												68.1748
												68.3007
												68.5342
												69.5797
												68.6862
												72.3692
												63.6873
												70.5147
												65.9066
												54.3883
												65.6718
												67.3515
												65.854
												66.5911
												67.251
												59.5141
												64.6215
												63.1638
												67.7846
												65.6675
												69.8129
												70.5545
												68.6257
												68.1942
												66.7983
												66.3293
												65.8107
												66.5116
												65.4943
												62.7066
												62.5027
												65.4109
												66.7184
												64.2321
												65.0971
												68.2014
												66.4712
												63.0382
												64.33
												63.789
												64.81
												65.8807
												64.8056
												64.7034
												62.7626
												63.6306
												63.6479
												61.7097
												62.4899
												58.1464
												61.9459
												65.2388
												64.4208
												61.5722
												63.5699
												64.3864
												62.0442
												58.8207
												61.7301
												64.8543
												65.5897
												62.9171
												59.4267
												60.0998
												58.3316
												57.5063
												5.70292
												55.819
												66.4805
												64.6007
												64.4845
												60.6226
												57.5703
												62.3317
												100
												59.9891
												63.2176
												57.3626
												63.1068
												63.1384
												63.1151
												62.0677
												55.8448
												61.1329
												62.4207
												61.1981
												58.4683
												65.1979
												63.0621
												66.1302
												65.4002
												63.9509
												64.9333
												64.5393
												65.0011
												63.439
												71.0104
												75.7575
												74.187
												72.61
												71.4466
												65.9977
												69.885
												68.6492
												67.6252
												70.5937
												71.2149
												69.1261
												69.2935
												55.3649
												70.0412
												70.0492
												69.6671
												71.7755
												70.4194
												70.9626
												73.8929
												70.5309
												50.599
												69.701
												71.172
												71.4734
												15.7817
												71.242
												70.1073
												66.0442
												73.7133
												73.907
												72.4715
												72.3518
												65.9521
												65.684
												62.7272
												68.0109
												67.0434
												59.388
												66.1629
												58.7123
												43.3005
												68.8214
												72.683
												69.4431
												67.9254
												72.0533
												70.5388
												72.5908
												73.3446
												66.7444
												68.9357
												54.5405
												72.4228
												65.8935
												66.6943
												70.7865
												70.7388
												75.8466
												70.735
												74.2709
												70.0462
												69.2254
												70.9741
												65.6955
												65.0174
												59.0619
												63.422
												67.6797
												66.7947
												66.8274
												66.8447
												68.7588
												65.7186
												68.0407
												64.6881
												68.4578
												66.9887
												64.1249
[truncated: 39,028 more rows]

## Sheet: Oxide Minerals
Sample_Grain	Grain # / Point	Oxide Type	Grain Type	SiO2 wt.%	TiO2 wt.%	Al2O3 wt.%	Fe2O3 wt.%	Cr2O3 wt.%	FeO wt.%	MnO wt.%	MgO wt.%	CaO wt.%	ZnO wt.%	V2O3 wt.%	NiO wt.%	Total
MF9466_ox1	1 / 1 .	Chromite	Incl in Ol2	0.4183	1.8642	17.5992	6.18738	31.7542	20.2753	0	7.5702	0.0369	0.1636	0.3637	0.1476	86.3437
MF9466_ox2	2 / 1 .	Chromite	Incl in Ol5	0.0566	1.3579	19.716	9.87296	34.9714	20.2982	0	9.6338	0.0033	0.0803	0.2998	0.1945	96.4815
MF9466_ox3	3 / 1 .	Chromite	Incl in Ol5	0.0712	2.0205	20.7728	10.408	31.8962	21.7565	0	9.2946	0.0143	0.0632	0.3786	0.1882	96.8499
MF9466_ox4	4 / 1 .	Chromite	Incl in Ol5	0.0453	2.1526	19.7058	10.2998	32.4894	23.662	0	8.0359	0.0056	0.1993	0.3798	0.1219	97.0918
MF9466_ox5	5 / 1 .	Chromite	Groundmass (Rim @Ol13)	0.0532	2.5887	19.3283	10.4188	30.9958	28.0041	0	5.5821	0.0169	0.1961	0.4242	0.081	97.6723
MF9466_ox6	6 / 1 .	Ilmenite	Groundmass (Rim @Plag23)	0.0254	68.9673	0	-44.499	0	60.0842	0.2176	0.9297	0.0672	0.026	0.3357	0.0388	86.1929
MF9466_ox6	6 / 2 .	Ilmenite	Groundmass (Rim @Plag23)	0.0571	55.8002	0	-17.0637	0	47.1842	0.4116	1.3924	0.1413	0	0.1249	0.0217	88.0698
MF9466_ox7	7 / 1 .	Ilmenite	Groundmass	0.0349	40.2867	0.0985	19.7571	0.0159	32.7874	0.4059	1.6624	0.049	0.0653	0.6013	0.023	95.7874
MF9466_ox8	8 / 1 .	Ilmenite	Groundmass	0.3149	61.7816	0.0108	-28.6902	0.0088	51.9847	0.3923	1.8608	0.1756	0.0329	0.2918	0	88.1641
MF9466_ox9	9 / 1 .	Ilmenite	Groundmass	0.0027	42.6346	0.0384	15.5719	0.0059	34.0206	0.4737	2.093	0.0533	0.0637	0.5866	0.0079	95.5524
MF9466_ox10	10 / 1 .	Ilmenite	Groundmass	0.1455	47.3786	0.0593	3.6758	0.0216	40.3932	0.2628	1.0533	0.1598	0.0594	0.665	0.0312	93.9055
MF9466_ox11	11 / 1 .	Ilmenite	Groundmass	0.0701	44.3908	0.022	11.881	0.0361	36.1386	0.4974	1.8391	0.0402	0.0499	0.5954	0.018	95.5786
MF9466_ox11	11 / 2 .	Ilmenite	Groundmass	0.0452	44.4105	0.0107	12.3554	0.0091	35.8294	0.5251	1.9301	0.1155	0.0617	0.5844	0	95.8771
MF9466_ox12	12 / 1 .	Ilmenite	Groundmass	0.0949	46.2771	0.0332	8.02573	0.0112	37.9365	0.529	1.7732	0.0627	0.0332	0.6007	0.0142	95.3916
MF9466_ox12	12 / 2 .	Ilmenite	Groundmass	0.0696	45.3297	0.0057	10.2983	0.0315	36.3757	0.6253	2.0703	0.0931	0.047	0.5041	0.0198	95.4701
MF9468_ox1	1 / 1 .	Chromite	Incl in Ol (not analyzed)	0.0728	5.542	12.9505	14.0772	29.7989	27.8312	0	6.903	0.0264	0.1835	0.6925	0.1824	98.2341
MF9468_ox2	2 / 1 .	Chromite	Incl in Ol (not analyzed)	0.0773	4.7875	13.3311	14.4851	30.5397	27.5617	0	6.8035	0.016	0.0983	0.6991	0.1576	98.5408
MF9468_ox3	3 / 1 .	Chromite	Incl in Ol (not analyzed)	0.0488	4.6768	12.9423	14.1426	29.977	30.9455	0	4.4098	0.0375	0.1422	0.6995	0.106	98.0905
MF9468_ox4	4 / 1 .	Chromite	Incl in Ol (not analyzed)	0.0862	2.3003	16.8957	15.4336	31.162	22.92	0	8.7071	0.0199	0.0533	0.657	0.1483	98.3636
MF9468_ox5	5 / 1 .	Ilmenite	Groundmass	10.6996	39.189	3.0939	-5.91921	0.0175	42.8732	0.3809	1.1997	2.0525	0.0224	0.2905	0.0326	93.9325
MF9468_ox6	6 / 1 .	Magnetite	Incl in Plag (not analyzed)	0.0945	22.5878	1.4763	21.1844	0.0186	48.7194	0.628	1.1957	0.0818	0.0943	0.527	0.023	96.6308
MF9468_ox7	7 / 1 .	Magnetite	Groundmass	0.3273	21.6484	1.4328	21.7929	0.0393	47.4572	0.4095	1.3495	0.4376	0.062	0.809	0.0611	95.8267
MF9468_ox8	8 / 1 .	Magnetite	Groundmass	0.0886	23.1436	1.2702	20.1547	0.0614	48.9157	0.4358	1.4256	0.117	0.1094	0.7577	0.0628	96.5424
MF9468_ox9	9 / 1 .	Magnetite	Groundmass	0.0852	19.5701	1.3706	26.5231	0.0453	45.8652	0.4145	1.2223	0.1094	0.131	0.9003	0.0466	96.2836
MF9468_ox10	10 / 1 .	Chromite	Groundmass (Rim @Ol not analyzed)	0.059	3.8908	15.317	13.3397	29.8735	30.1192	0.0082	4.6302	0.0344	0.1944	0.5781	0.1697	98.1799
MF9468_ox11	11 / 1 .	Magnetite	Groundmass	0.0751	24.096	1.0268	17.3824	0.0463	49.6033	0.3546	1.3385	0.0739	0.0816	0.94	0.034	95.0525
MF9468_ox12	12 / 1 .	Ilmenite	Groundmass	6.285	43.9354	1.5183	-1.94377	0	42.7006	0.4292	2.0614	0.1708	0.0104	0.3157	0.0164	95.4995
MF9468_ox13	13 / 1 .	Magnetite	Groundmass	0.121	23.3223	1.0571	18.469	0.0451	48.9165	0.3995	1.2304	0.1506	0.1056	1.0789	0.0429	94.9389
MF9468_ox14	14 / 1 .	Chromite	Groundmass (Rim @ Ol not analyzed)	0.4779	4.3512	13.0384	15.6134	29.5641	28.692	0	5.5912	0.0168	0.1364	0.6627	0.1592	98.2866
MF9468_ox14	14 / 2 .	Chromite	Groundmass (Rim @ Ol not analyzed)	0.0569	4.6383	13.2497	14.0318	30.1983	31.3491	0.0231	4.293	0.0303	0.1315	0.6985	0.097	98.7672
MF9468_ox15	15 / 1 .	Magnetite	Groundmass	0.0981	23.6059	1.2247	19.2273	0.0414	49.1897	0.4603	1.4098	0.1879	0.2057	0.8431	0.0525	96.5464
MF9468_ox16	16 / 1 .	Magnetite	Groundmass	0.0597	23.08	1.3046	21.4107	0.0339	48.9988	0.4391	1.5985	0.1157	0.0891	0.6567	0.0309	97.8177
MF9468_ox17	17 / 1 .	Chromite	Incl in Ol (not analyzed)	0.0652	3.2633	19.2489	16.3092	26.0904	24.1442	0	8.7002	0.0187	0.1304	0.6341	0.2271	98.813
MF9468_ox18	18 / 1 .	Chromite	Groundmass (Rim @Ol not analyzed)	0.0734	3.9805	15.3044	14.0679	29.6815	30.3032	0	4.7887	0.0141	0.1411	0.5788	0.1481	99.0676
MF9468_ox19	19 / 1 .	Magnetite	Groundmass	0.0653	22.76	1.1093	21.3421	0.0712	48.5799	0.3899	1.4973	0.1626	0.0842	1.0382	0.0964	97.1964
MF9468_ox20	20 / 1 .	Ilmenite	Groundmass	0.9641	47.7393	0.2042	5.8887	0.0328	38.9393	0.4239	2.494	0.1433	0.1127	0.7996	0.0554	97.7973
MF9468_ox21	21 / 1 .	Magnetite	Groundmass	0.4721	22.4336	1.137	20.5511	0.0467	48.438	0.4433	1.5486	0.1354	0.1279	0.818	0.0182	96.1698
MF9468_ox22	22 / 1 .	Magnetite	Groundmass	0.0925	18.0563	1.5576	29.2683	0.0454	44.6348	0.3862	1.21	0.118	0.1399	1.1477	0.0898	96.7465
MF9468_ox23	23 / 1 .	Magnetite	Groundmass	0.1169	26.5846	1.2917	12.7799	0.0271	51.7145	0.4283	1.508	0.2145	0.1043	0.9195	0.0196	95.7089
MF9469_ox1	24 / 1 .	Chromite	Incl in Ol (not analyzed)	0.1093	0.9922	33.6271	9.87008	23.0332	16.6624	0	13.594	0	0.1184	0.3285	0.2863	98.6215
MF9469_ox2	25 / 1 .	Chromite	Incl in Ol (not analyzed)	0.1149	1.0228	32.6937	10.1191	23.8292	16.9908	0	13.3385	0.0005	0.1091	0.3159	0.2895	98.8235
MF9469_ox3	26 / 1 .	Chromite	Groundmass (Rim @Ol not analyzed)	0.0501	13.098	4.0067	19.9156	18.5702	37.4256	0.1389	4.2095	0.0022	0.1222	0.864	0.1421	98.5429
MF9469_ox4	27 / 1 .	Chromite	Groundmass (Rim @Ol not analyzed)	0.0476	2.8137	20.1368	12.4896	28.9331	26.7949	0	6.7435	0.0088	0.1712	0.3759	0.108	98.6143
MF9469_ox5	28 / 1 .	Ilmenite	Groundmass	0.0555	45.8288	0.0382	11.8718	0.0972	35.7018	0.3442	2.7592	0.2046	0.0695	0.7406	0.0315	97.743
MF9469_ox6	29 / 1 .	Ilmenite	Groundmass	0.0374	48.0871	0	6.75901	0.1135	37.8913	0.3425	2.7529	0.1224	0	0.6667	0.0477	96.8205
MF9469_ox7	30 / 1 .	Chromite	Incl in Ol (not analyzed)	0.1038	1.575	24.3903	11.3576	29.0877	22.3572	0	9.3483	0.0002	0.1742	0.3451	0.1962	98.9354
MF9469_ox8	31 / 1 .	Chromite	Incl in Ol (not analyzed)	0.0695	1.5578	25.4815	11.0961	28.6971	21.4389	0	10.0926	0.0002	0.1718	0.3168	0.1867	99.1088
MF9469_ox9	32 / 1 .	Ilmenite	Groundmass	0.0284	46.6113	0.0111	11.1666	0.0282	35.6231	0.4026	3.245	0.1019	0.0205	0.7311	0.037	98.0068
MF9469_ox9	32 / 2 .	Ilmenite	Groundmass	0.0307	46.7065	0.0183	10.9964	0.039	35.8414	0.4207	3.1672	0.0928	0.0228	0.7641	0.0408	98.1407
MF9469_ox10	33 / 1 .	Magnetite	Groundmass	0.0711	18.8412	1.5705	27.9943	0.1006	43.4909	0.3874	2.4666	0.0745	0.1151	1.5335	0.0776	96.7233
MF9469_ox11	34 / 1 .	Ilmenite	Groundmass	0.2369	46.1798	0.1118	10.5043	0.0465	35.9388	0.448	2.8728	0.218	0.0365	0.6405	0.0346	97.2685
MF9469_ox12	35 / 1 .	Ilmenite	Groundmass	0.0811	45.852	0.1141	11.5504	0.0505	35.3669	0.3649	3.0118	0.1729	0.0194	0.6486	0.046	97.2787
MF9469_ox13	36 / 1 .	Ilmenite	Groundmass	0.0322	47.2455	0.0437	11.1634	0.0573	35.7458	0.3824	3.5023	0.0993	0.0403	0.581	0.0433	98.9365
MF9469_ox14	37 / 1 .	Ilmenite	Groundmass	0.025	46.6337	0	12.082	0.0579	36.155	0.3776	2.9742	0.0806	0.0426	0.7061	0.027	99.1616
MF9469_ox15	38 / 1 .	Ilmenite	Groundmass	0.032	46.1099	0.0214	12.9774	0.065	35.3975	0.3886	3.1313	0.099	0.0198	0.7333	0.0512	99.0264
MF9469_ox16	39 / 1 .	Ilmenite	Groundmass	0.0661	45.1532	0.0335	12.9269	0.0599	34.7213	0.402	2.8986	0.292	0.0315	0.6772	0.009	97.2712
MF9469_ox17	40 / 1 .	Ilmenite	Groundmass	0.0017	47.1532	0.0043	10.7528	0.0465	36.7782	0.3551	2.9115	0.0336	0.0551	0.7335	0.0394	98.8648
MF9469_ox17	40 / 2 .	Ilmenite	Groundmass	0.6994	45.8299	0.0058	12.6599	0.0421	35.1724	0.3701	3.5737	0.082	0.046	0.7612	0.0367	99.2792
MF9469_ox17	40 / 3 .	Ilmenite	Groundmass	0.0221	47.2933	0	10.7144	0.0513	36.8199	0.382	2.9649	0.0438	0.0247	0.7408	0.056	99.1132
MF9469_ox18	41 / 1 .	Ilmenite	Groundmass	0.0369	46.5678	0.0173	11.4508	0.0806	36.0776	0.4203	2.8939	0.1875	0.0372	0.7172	0.074	98.5611
MF9469_ox18	41 / 2 .	Ilmenite	Groundmass	0.0237	46.3455	0.0178	11.7031	0.079	35.9471	0.3541	2.9351	0.134	0.011	0.8549	0.0398	98.4452
MF9469_ox18	41 / 3 .	Ilmenite	Groundmass	0.0422	46.7636	0.0144	11.3076	0.0707	36.1085	0.3598	3.0566	0.1275	0.0369	0.7581	0.0726	98.7184
MF9469_ox19	42 / 1 .	Ilmenite	Groundmass	0.014	46.85	0.0147	10.8355	0.05	36.6638	0.3884	2.8145	0.0644	0.0053	0.7393	0.0522	98.4921
MF9469_ox20	43 / 1 .	Ilmenite	Groundmass	0.0369	46.5476	0.0101	11.3052	0.0103	36.1662	0.3602	2.9892	0.0447	0	0.8058	0.0661	98.3423
MF9469_ox20	43 / 2 .	Ilmenite	Groundmass	0.0472	46.4846	0.0227	11.6299	0.081	36.1859	0.3559	2.8982	0.0624	0.0904	0.8409	0.0252	98.7243
JS19_ox1	13 / 1 .	Chromite	Incl in Ol11	0.0549	9.8138	8.7457	26.6087	12.4903	34.5119	0.227	4.6228	0.0074	0.0908	1.1002	0.156	98.4222
JS19_ox2	14 / 1 .	Chromite	Incl in Ol11	0.0579	8.8945	8.9057	27.474	12.7418	32.9243	0.231	4.8879	0.0014	0.1036	1.049	0.1525	97.4223
JS19_ox3	15 / 1 .	Chromite	Incl in Ol11	0.0501	9.1669	9.6829	25.4176	14.2454	33.6504	0.162	5.0326	0.0019	0.0935	1.101	0.142	98.7444
JS19_ox4	16 / 1 .	Magnetite	Groundmass	0.077	19.9651	1.5058	25.8453	0.163	46.6395	0.445	1.1667	0.0444	0.1555	1.1418	0.0553	97.2044
JS19_ox5	17 / 1 .	Ilmenite	Groundmass	0.062	48.8292	0	6.42553	0.0215	39.6511	0.5562	1.9889	0.1621	0.036	0.3537	0.0159	98.1021
JS19_ox6	18 / 1 .	Magnetite	Groundmass (Rim @Ol10)	0.0861	19.5361	1.6522	27.0931	0.0663	46.0342	0.4731	1.3923	0.0311	0.146	0.9928	0.0526	97.5559
JS19_ox7	19 / 1 .	Magnetite	Incl in Plag12	0.0737	22.7578	0.4913	20.2839	0.0975	49.4566	0.5071	0.4267	0.0538	0.0872	0.566	0.0345	94.8361
JS19_ox8	20 / 1 .	Magnetite	Incl in Plag12	0.0962	23.7014	0.9464	18.3876	0.0709	49.3806	0.4988	1.1357	0.0792	0.0908	0.5556	0.0202	94.9634
JS19_ox9	21 / 1 .	Magnetite	Incl in Plag12	0.0734	22.4158	0.9962	22.1577	0.082	48.9176	0.5363	1.0001	0.0795	0.1268	0.592	0.0421	97.0195
JS19_ox10	22 / 1 .	Magnetite	Groundmass	0.0619	23.9731	1.0537	19.3127	0.0425	49.4918	0.5501	1.628	0.0194	0.086	0.7349	0.0319	96.9861
JS19_ox11	23 / 1 .	Magnetite	Groundmass	0.0864	24.8395	0.9402	17.9362	0.0602	50.4495	0.5001	1.6005	0.0199	0.1012	0.6112	0.0268	97.1718
JS19_ox12	24 / 1 .	Magnetite	Groundmass	0.0823	24.5625	1.0178	18.0598	0.0584	50.0867	0.4647	1.6148	0.0307	0.1166	0.6954	0.0137	96.8033
JS19_ox12	24 / 2 .	Magnetite	Groundmass	0.0606	24.5987	0.8468	17.7174	0.0739	49.7034	0.4944	1.6339	0.0725	0.094	0.7108	0.0542	96.0606
JS22_ox1	44 / 1 .	Magnetite	Groundmass	2.4892	19.8456	1.6859	18.2279	0	48.5299	0.5532	1.049	0.1498	0.1704	0.5342	0	93.2351
JS22_ox1	44 / 2 .	Magnetite	Groundmass	0.1177	22.3392	1.2017	20.536	0.0047	48.3346	0.5466	1.0221	0.025	0.1048	0.6389	0.0336	94.9049
JS22_ox2	45 / 1 .	Ilmenite	Groundmass	0.0412	47.1471	0	6.6681	0.0091	40.5496	0.5934	0.6701	0.0451	0.066	0.4146	0.01	96.2143
JS22_ox2	45 / 2 .	Ilmenite	Groundmass	0.0856	46.2612	0	8.55531	0	39.6676	0.5417	0.8009	0.0341	0.0337	0.3778	0.0317	96.3896
JS22_ox3	46 / 1 .	Chromite	Incl in Ol2	0.0924	1.4313	29.278	12.4168	22.9816	19.2313	0	11.5395	0.0018	0.1057	0.3197	0.2207	97.617
JS22_ox4	47 / 1 .	Chromite	Incl in Ol2	0.1091	1.436	33.2068	11.1176	20.2815	19.0917	0	12.1406	0.0025	0.1449	0.3648	0.2344	98.1273
JS22_ox5	48 / 1 .	Chromite	Incl in Ol2	0.0939	1.5712	29.3392	11.5119	24.2791	19.7359	0	11.5853	0.0226	0.125	0.3865	0.2103	98.8384
JS22_ox6	49 / 1 .	Chromite	Incl in Ol2	0.0975	1.529	29.2865	11.9306	23.8976	19.5631	0	11.5704	0.0173	0.1364	0.3357	0.2249	98.5717
JS22_ox7	50 / 1 .	Ilmenite	Incl in Ol2	0.027	47.445	0.0018	8.57243	0.0285	39.6124	0.5263	1.3818	0.0482	0.0474	0.5801	0	98.2709
JS22_ox8	51 / 1 .	Ilmenite	Groundmass	0.043	48.4136	0	6.09399	0.0156	39.0843	0.5151	2.139	0.0858	0.0836	0.5017	0	96.9757
JS22_ox8	51 / 2 .	Ilmenite	Groundmass	0.0256	48.6702	0	5.99988	0.0108	39.526	0.4956	2.0363	0.0976	0.0338	0.4701	0	97.3658
JS22_ox9	52 / 1 .	Ilmenite	Groundmass	0.2495	48.335	0.0443	6.45094	0.004	39.1311	0.568	2.1947	0.1162	0.0129	0.4809	0.0228	97.6103
JS22_ox10	53 / 1 .	Chromite	Incl in Ol6	0.0911	2.544	21.4431	13.3889	28.4797	21.4312	0	10.1714	0.0092	0.098	0.4623	0.1759	98.2856
JS22_ox11	54 / 1 .	Chromite	Incl in Ol6	0.0929	3.1721	19.1414	13.8843	27.8971	23.7244	0	8.6441	0.0218	0.0868	0.5181	0.1451	97.3062
JS22_ox12	55 / 1 .	Ilmenite	Groundmass	0.0551	47.7932	0	5.49303	0	40.2507	0.8518	0.9673	0.1727	0	0.2047	0.0031	95.7917
JS22_ox12	55 / 2 .	Ilmenite	Groundmass	0.1655	46.9767	0	6.38193	0.0048	40.1067	0.6798	0.811	0.1435	0.036	0.2373	0.0048	95.548
JS22_ox13	56 / 1 .	Magnetite	Groundmass	1.9409	18.8855	1.8493	21.9864	0.038	46.8159	0.3463	1.5174	0.1389	0.0757	0.7017	0.054	94.3499
JS22_ox14	57 / 1 .	Chromite	Incl in Ol7	0.112	1.7553	24.8191	12.3668	26.5056	20.3572	0	10.4853	0.0412	0.0946	0.4231	0.2087	97.1277
JS22_ox15	58 / 1 .	Ilmenite	Groundmass	0.0524	47.6969	0	6.55332	0	39.3136	0.574	1.5977	0.1297	0.068	0.3725	0.0007	96.3588
JS22_ox16	59 / 1 .	Ilmenite	Groundmass	0.0196	47.9367	0	6.03523	0.0267	39.6354	0.57	1.5519	0.0858	0.0642	0.4506	0.0104	96.3865
JS22_ox17	60 / 1 .	Magnetite	Groundmass	0.0825	24.1424	1.6227	17.4681	0.1474	49.0631	0.4922	1.9377	0.025	0.087	0.9725	0.0481	96.0888
JS22_ox18	61 / 1 .	Magnetite	Groundmass	0.164	24.4262	1.2003	16.2611	0.042	49.6574	0.5039	1.3941	0.0761	0.1231	0.7686	0.0302	94.647
JS22_ox19	62 / 1 .	Magnetite	Groundmass	0.123	23.3321	1.4143	19.1283	0.0476	49.101	0.4778	1.4537	0.0201	0.108	0.9124	0.0381	96.1564
JS22_ox20	63 / 1 .	Ilmenite	Groundmass	0.0457	47.287	0.0743	7.49061	0.0211	38.2869	0.5432	1.9435	0.1703	0.0824	0.5263	0	96.4713
JS27_ox1	64 / 1 .	Chromite	Incl in Ol (not analyzed)	0.065	2.7691	19.4932	16.4484	26.9503	22.0011	0	9.6305	0.0144	0.1338	0.4558	0.2149	98.1621
JS27_ox2	65 / 1 .	Chromite	Incl in Ol (not analyzed)	0.0689	2.6978	20.5959	16.8951	26.3748	22.071	0	9.8956	0.0468	0.1137	0.4197	0.2185	99.3511
JS27_ox3	66 / 1 .	Chromite	Incl in Ol (not analyzed)	0.0716	3.2337	18.3767	17.0847	25.087	28.8368	0.0931	5.4164	0.0621	0.1955	0.4139	0.1331	98.9425
JS27_ox4	67 / 1 .	Magnetite	Groundmass	0.1059	25.1688	0.8359	16.8806	0.0693	50.0093	0.5883	1.8019	0.0534	0.1633	0.6324	0.0261	96.3352
JS27_ox5	68 / 1 .	Magnetite	Groundmass	0.0649	23.6495	1.083	20.3796	0.1709	49.2245	0.5961	1.7298	0.0452	0.1406	0.8422	0.0275	97.9538
JS27_ox6	69 / 1 .	Magnetite	Groundmass	0.077	24.117	1.2597	19.3165	0.0469	49.8744	0.5957	1.6254	0.0115	0.1147	0.7287	0.0336	97.8012
JS27_ox6	69 / 2 .	Magnetite	Groundmass	0.0833	23.8068	1.4289	18.9436	0.1511	49.311	0.56	1.6216	0.0418	0.1686	0.7686	0.0302	96.9155
JS27_ox7	70 / 1 .	Magnetite	Groundmass	0.1171	21.7127	0.2164	23.1124	0.0133	48.9982	0.6758	0.1799	0.0223	0.1356	0.5362	0.0068	95.7267
JS27_ox7	70 / 2 .	Magnetite	Groundmass	0.0648	21.4487	0.0752	23.9697	0.0183	48.8909	0.6643	0.0379	0.0297	0.1112	0.4699	0.0493	95.83
JS27_ox8	71 / 1 .	Magnetite	Groundmass	0.0946	21.8836	1.3414	22.5195	0.0902	47.6754	0.6785	1.3928	0.029	0.2168	0.7649	0.0103	96.697
JS27_ox8	71 / 2 .	Magnetite	Groundmass	0.0899	22.4066	1.1817	21.6527	0.0255	47.7698	0.6469	1.5113	0.0774	0.1628	0.5879	0.035	96.1475
JS27_ox9	72 / 1 .	Chromite	Incl in Ol4	0.0873	2.8403	20.5836	14.8234	27.4631	22.8628	0	9.3663	0.0182	0.1145	0.407	0.1801	98.7284
JS27_ox10	73 / 1 .	Magnetite	Groundmass	0.095	32.7031	0.9001	2.07431	0.3098	57.0267	0.5695	1.8989	0.0416	0.077	0.7122	0.0103	96.4185
JS27_ox10	73 / 2 .	Magnetite	Groundmass	0.3291	21.3484	1.2354	19.1451	0.1522	44.3652	0.5488	1.1089	1.7557	0.0829	1.0903	0.056	91.218
JS27_ox11	74 / 1 .	Magnetite	Groundmass	0.0757	23.4847	1.1479	20.3538	0.1983	49.1636	0.5916	1.7035	0.01	0.0508	0.8043	0.0223	97.6065
JS27_ox11	74 / 2 .	Magnetite	Groundmass	0.0989	23.2886	0.8996	20.7712	0.0285	48.7648	0.5825	1.6187	0.0127	0.1425	0.544	0.0069	96.7589
JS27_ox12	75 / 1 .	Magnetite	Groundmass	0.1004	21.265	0.9278	24.423	0.0062	46.6078	0.5965	1.6779	0.0654	0.115	0.5274	0.0082	96.3206
JS27_ox12	75 / 2 .	Magnetite	Groundmass	2.5879	23.2957	1.5564	11.896	0.0367	50.626	0.5872	1.7395	0.3282	0.1168	0.5803	0	93.3508
JS27_ox13	76 / 1 .	Magnetite	Groundmass (Rim @Plag3)	0.0842	22.2927	1.079	22.7403	0.0341	48.6219	0.6049	1.2717	0.0158	0.1097	0.703	0.036	97.5934
JS27_ox13	76 / 2 .	Magnetite	Groundmass (Rim @Plag3)	0.0936	22.4054	1.2184	22.1101	0.1241	48.5511	0.6609	1.3404	0.0504	0.1172	0.8303	0.0196	97.5214
JS27_ox14	77 / 1 .	Magnetite	Groundmass (Rim @Plag3)	0.1005	21.9043	1.3066	23.6839	0.0105	48.3935	0.6679	1.3204	0.0135	0.1082	0.639	0	98.1482
JS27_ox14	77 / 2 .	Magnetite	Groundmass (Rim @Plag3)	0.1077	20.9361	1.0575	25.8446	0.0105	47.462	0.6668	1.2527	0.0262	0.125	0.4429	0	97.932
JS27_ox15	78 / 1 .	Magnetite	Groundmass (Rim @Plag3)	0.0938	23.9174	1.2196	19.5539	0.1037	49.6556	0.5964	1.6407	0.0189	0.0906	0.7081	0.012	97.6106
JS27_ox15	78 / 2 .	Magnetite	Groundmass (Rim @Plag3)	0.1094	23.9201	1.0549	19.9439	0.2157	49.6509	0.6196	1.6626	0.077	0.1027	0.6854	0.0127	98.0549
JS27_ox16	79 / 1 .	Magnetite	Groundmass	0.06	24.3014	1.291	19.1886	0.0433	49.6453	0.5546	1.9416	0.0326	0.0922	0.9155	0.0787	98.1448
JS27_ox16	79 / 2 .	Magnetite	Groundmass	0.1656	23.985	2.5297	17.9084	0.0667	49.6408	0.5439	1.8609	0.0543	0.2077	0.8147	0.0499	97.8277
JS27_ox17	80 / 1 .	Magnetite	Groundmass (Rim @Plag7)	0.1038	23.4911	1.0146	20.3673	0.0186	49.3208	0.5501	1.4399	0.0814	0.1038	0.5539	0.0247	97.0699
JS27_ox18	81 / 1 .	Magnetite	Groundmass (Rim @Plag7)	0.0673	24.2056	1.5699	18.3869	0.0684	49.2278	0.5788	1.9703	0.0481	0.1062	0.8842	0.0656	97.1791
Notes
On any given grain, point 1 = core analysis, 2 = midpoint analysis, 3 = rim analysis. Where only 2 points are analyzed, 1 = core and 2 = rim. Where more than 3 points are analyzed, 1 = core, final point = rim, and all others are midpoints increasingly farther from the core.
Bold & Italics = grains used in Fe-Ti oxide thermobarometry.
Red text indicates an erroneous analysis (not appropriate oxide mineral or off grain). These data were not used for any plots, calculations or models.
Orange text indicates low or high total (96% or less). These data were not used for any plots, calculations or models.

## Sheet: FO83 Std
Olivine Standard (USNM 2566 FO83 Springwater Meteorite) Analyzed as Unknown
Analysis	SiO2	Al2O3	K2O	MnO	FeO	NiO	Na2O	MgO	CaO	Cr2O3	TiO2	Total*
1	38.9143	0.0136	0.0162	0.3276	16.4194	0	0.0021	43.6506	0.0128	0.0193	0.0018	99.3312
2	39.4406	0.0071	0.0305	0.2823	16.8573	0.06	0.0014	43.7939	0.0125	0.0565	0	100.431
3	38.7103	0.0213	0.0058	0.2795	16.7515	0	0.0068	43.8512	0.0173	0.0102	0.0044	99.6027
4	38.9397	0	0	0.262763	16.8323	0.0212522	0	43.5588	0.00195888	0.000146155	0.0073413	99.5938
5	38.889	0.0162494	0.00566163	0.262892	16.6533	0.0515398	0.00930089	43.4804	0.00867502	0.0252847	0	99.3109
6	39.3105	0.0187057	0	0.309118	16.6975	0.0110715	0.00727896	43.6946	0.00965446	0.0282078	0	100.04
7	39.2031	0.00661311	0	0.298401	16.3924	0.0110715	0	43.4403	0.0116133	0.012277	0	99.3465
8	39.3624	0	0.0042161	0.317123	16.9819	0	0.00687457	43.4804	0.0114734	0.0173924	0.00567282	100.159
9	39.0048	0.00604628	0.00036138	0.328874	16.4411	0	0.00390907	43.2116	0.0146916	0.0133001	0.0101777	98.9996
10	39.0202	0.017383	0	0.302145	16.6806	0.0111988	0	43.3446	0.010494	0.0201693	0	99.3677
11	38.6614	0.00944731	0	0.314799	16.7712	0.00916263	0.00107836	43.4066	0.0149714	0.00774619	0.0126804	99.1617
12	38.6774	0.0177609	0.00650485	0.312992	16.6261	0	0	43.2413	0.0159508	0.00292309	0.00984402	98.8607
13	39.1806	0.00699101	0	0.33081	16.5006	0	0	43.3701	0.00391775	0.0176847	0.00400435	99.3999
14	39.159	0.0109589	0	0.313121	16.8924	0	0.00390907	43.6499	0.0149714	0.0233847	0	100.038
15	39.0246	0.0264525	0.0103596	0.347209	16.2846	0.011326	0.00336989	43.7325	0.0103541	0.0138847	0.00183532	99.4028
16	38.2447	0.0119036	0.0163826	0.344885	16.6667	0	0	43.7878	0.000559679	0.0239693	0.00634021	99.0681
17	38.9168	0.0137931	0	0.348113	16.3908	0	0.017793	43.5746	0.0170702	0.0159308	0	99.2462
18	39.3941	0.0166273	0	0.263796	16.5783	0	0.000808773	43.6723	0.0152512	0.0223616	0.0118462	99.9309
19	38.6612	0.00944731	0	0.313766	16.7102	0.0139985	0.00808773	43.5857	0.00559679	0.0175385	0.00834239	99.2884
20	38.9372	0.00944731	0	0.30731	16.4992	0.0152711	0	43.7648	0.0111936	0.0204616	0.0100109	99.5289
21	39.2281	0.00188946	0.00963681	0.326678	16.3165	0	0.00404387	43.4978	0.0111936	0.0365386	0	99.4057
22	39.0869	0.0151157	0.0012046	0.342173	16.7951	0	0	43.7018	0.00699598	0.0219232	0	99.9479
23	38.4601	0.0170052	0	0.334426	16.6678	0.0279969	0.00269591	43.5426	0.00559679	0.0306924	0	99.0355
24	39.0184	0	0.0036138	0.347338	16.4169	0.0241792	0.00134796	43.6603	0.00419759	0.00876927	0.00166848	99.4518
25	38.8516	0.0132262	0.00722761	0.346047	16.7295	0.0445406	0.00134796	43.8759	0.0013992	0.0175385	0	99.8206
26	38.965	0.00944731	0	0.30731	16.992	0.0114533	0	43.5525	0.00699598	0.0248463	0	99.8416
27	38.935	0.0132262	0	0.351212	16.8221	0	0	43.6205	0.00839518	0.016077	0	99.745
28	38.8473	0	0.0024092	0.303437	16.4182	0	0	43.5708	0.013992	0.00876927	0	99.1485
29	38.7403	0.0132262	0	0.32797	16.8041	0.0509035	0	43.667	0.0125928	0.0146155	0	99.554
30	39.0886	0.00587682	0	0.287555	16.7909	0	0	43.3791	0.00349799	0.0299617	0.00617337	99.5761
31	38.923	0.0134598	0.0113077	0.318415	16.9503	0	0	43.4079	0.00349799	0.0238232	0.0111788	99.6235
32	39.4234	0	0	0.343464	16.7251	0	0.000539182	43.662	0.00881494	0.0369771	0	100.191
Average	38.9756	0.0106969	0.00410581	0.315736	16.658	0.0117177	0.00258391	43.5759	0.00963023	0.0199748	0.00354113	99.5453
Std Dev	0.274927	0.00680426	0.00683481	0.0260666	0.1986	0.0174142	0.00393082	0.167955	0.00483174	0.0109095	0.00441514	0.383009
												*Total includes sum of only those elements reported as accepted values for the standard
Olivine Standard Accepted Values (USNM 2566 FO83 Springwater Meteorite)
SiO2	38.95
FeO	16.62
MgO	43.58
MnO	0.3
Cr2O3	0.02
Total	99.47

## Sheet: KAUG Std
Clinopyroxene Standard USNM 122142 Kakanui New Zeland Augite) Analyzed as Unknown
Analysis	SiO2	Al2O3	K2O	MnO	FeO	Na2O	MgO	CaO	Cr2O3	TiO2	Total*
1	50.6431	8.70503	0.00855267	0.145262	6.97805	1.27463	16.6446	14.6542	0.154339	0.857264	99.9107
2	50.1089	8.71852	0	0.119825	6.99657	1.19308	16.728	14.7187	0.136508	0.857764	99.4414
3	50.398	8.7527	0.0119256	0.117759	7.08277	1.26007	16.6844	15.179	0.19497	0.85059	100.337
4	50.5948	8.68586	0.0103596	0.0980035	6.89172	1.25899	16.6632	14.8887	0.164716	0.863938	99.9555
5	51.1568	8.6475	0	0.129638	6.84477	1.20292	16.6816	14.7969	0.178893	0.844583	100.305
6	51.1009	8.59281	0.00325242	0.156108	6.82856	1.21154	16.6786	14.9627	0.208709	0.883792	100.418
7	51.3459	8.63343	0	0.129509	7.00686	1.26344	16.5503	0.849088	0.166616	14.7312	100.51
8	50.6835	8.57542	0.0091191	0.141647	6.95528	1.31453	16.6458	0.873281	0.148055	14.503	99.7015
9	50.5975	8.59969	0.0192109	0.104976	7.26969	1.26748	16.6124	0.866607	0.193655	14.7397	100.077
10	51.0109	8.57182	0.0167792	0.123311	7.06681	1.27759	16.6194	0.861435	0.235002	14.4855	100.033
Average	50.764	8.64828	0.00791994	0.126604	6.99211	1.25243	16.6508	9.26507	0.178146	6.36172	100.069
Std Dev	0.3812	0.0643626	0.00699022	0.0178989	0.129607	0.0381188	0.0489864	7.23307	0.0302031	7.1036	0.335292
											*Total includes sum of only those elements reported as accepted values for the standard
Clinopyroxene Standard Accepted Values (USNM 122142 Kakanui New Zeland Augite)
SiO2	50.73
Al2O3	8.73
Fe2O3	1.08
FeO	5.37
MgO	16.65
CaO	15.82
Na2O	1.27
K2O	0
TiO2	0.74
MnO	0.13
Total	100.52

## Sheet: LABR Std
Plagioclase Standard (USNM 115900 Lake County, Oregon Labradorite) Analyzed as Unknown
Analysis	SiO2	Al2O3	K2O	MnO	FeO*	Na2O	MgO	CaO	TiO2	Total*
1	51.0286	30.9998	0.0582	na	1.0565	3.4265	0.137	13.4602	0.012	100.179
2	51.3378	30.9133	0.12	na	0.445	3.4441	0.1246	13.5608	0.0393	99.9849
3	51.2991	31.3756	0.1194	na	0.3668	3.3291	0.1379	13.6609	0.0461	100.335
4	51.2345	30.6883	0.1281	na	0.4126	3.4783	0.1433	13.5128	0.0365	99.6344
5	51.0784	30.2539	0.1334	na	0.4181	3.3621	0.1432	13.6901	0.0199	99.0991
6	50.5505	30.8228	0.12564	na	0.515625	3.4354	0.133324	13.3829	0.032869	98.999
7	50.7745	30.747	0.129374	na	0.439207	3.34967	0.136143	13.5165	0.0410445	99.1334
8	51.3827	30.8626	0.10203	na	0.485135	3.49794	0.133987	13.4426	0.0443815	99.9514
9	51.2434	30.7948	0.121183	na	0.439207	3.41518	0.12951	13.5302	0.0492201	99.7227
10	50.3102	30.7941	0.11793	na	0.427758	3.44214	0.136641	13.4674	0.0241929	98.7204
11	50.9614	30.9122	0.119496	na	0.425957	3.37029	0.137304	13.4079	0.0440478	99.3786
12	50.5999	30.8311	0.114678	na	0.470855	3.47705	0.163836	13.4124	0.032869	99.1027
13	50.8966	30.9271	0.102752	na	0.421197	3.39941	0.138299	13.4172	0.0470511	99.3496
14	51.1523	30.741	0.127447	na	0.456446	3.41747	0.145595	13.417	0.0355386	99.4928
15	50.9878	31.099	0.129374	na	0.464037	3.38876	0.137304	13.4843	0.0245266	99.7151
16	50.8496	30.9282	0.119617	na	0.474329	3.39644	0.136641	13.5814	0.0310337	99.5173
17	50.7813	30.8581	0.115762	na	0.500316	3.4327	0.141781	13.5725	0.0423793	99.4449
18	50.8825	30.9925	0.126724	na	0.420682	3.39631	0.136972	13.5824	0.0510554	99.5891
19	50.6831	30.9233	0.121303	na	0.428015	3.50954	0.135314	13.6482	0.0398766	99.4887
20	51.0284	31.0847	0.100825	na	0.462107	3.48258	0.135314	13.6804	0.0585636	100.033
21	51.0329	30.9843	0.136481	na	0.462879	3.44955	0.14145	13.5694	0.048219	99.8252
22	50.6658	30.9139	0.125881	na	0.396882	3.44537	0.133656	13.4905	0.052557	99.2245
23	50.608	30.9341	0.10733	na	0.461978	3.47759	0.142445	13.595	0.0286978	99.3552
24	51.1157	30.7638	0.12564	na	0.437149	3.43985	0.125364	13.5473	0.0640695	99.6189
25	50.8093	30.7861	0.134193	na	0.445769	3.41558	0.139294	13.5903	0.036206	99.3568
26	51.1364	31.111	0.102256	na	0.41913	3.29483	0.114981	13.6665	0.0430467	99.8881
27	51.1617	30.8402	0.101769	na	0.461611	3.24388	0.109724	13.5652	0.0437141	99.5278
28	51.2122	30.9953	0.140921	na	0.428556	3.35143	0.118755	13.5218	0.0226913	99.7917
29	51.4342	30.8687	0.126573	na	0.487177	3.23025	0.106488	13.4673	0.0332027	99.7539
Average	50.9738	30.8878	0.118423	#DIV/0!	0.466586	3.40687	0.134349	13.5325	0.0387881	99.5591
Std Dev	0.277454	0.18533	0.0160035	#DIV/0!	0.117782	0.0695382	0.0113814	0.0880951	0.0117202	0.368018
				not analyzed						*Total includes sum of only those elements reported as accepted values for the standard
Plagioclase Standard Accepted Values (USNM 115900 Lake County, Oregon Labradorite)
SiO2	51.25
Al2O3	30.91
Fe2O3	0.34
FeO	0.15
MgO	0.14
CaO	13.64
Na2O	3.45
K2O	0.18
TiO2	0.05
MnO	0.01
Total	100.12

## Sheet: MAGT Std
Magnetite Standard (USNM 114887 Minas Gerais, Brazil) Analyzed as Unknown
Analysis	SiO2	TiO2	Al2O3	Fe2O3	Cr2O3	FeO	MnO	MgO	CaO	ZnO	V2O3	NiO	Total*
1	0.0846	0.1383	0.0443	66.97	0.12	30.455	0.1236	0.0988	0		0.2353	0.0267	97.9057
2	0.1334	0.1166	0.0446	66.8686	0.1517	30.5186	0.1169	0.0926	0		0.2322	0.0267	97.865
3	0.087	0.1046	0.0411	66.8695	0.1421	30.4048	0.106	0.0844	0.0034		0.2589	0.0358	97.7114
4	0.129	0.119	0.0452	67.2131	0.1828	30.7869	0.0429	0.0809	0		0.2781	0.0406	98.4256
5	0.0632	0.1555	0.0392	67.0733	0.1661	30.5331	0.0917	0.1012	0.0015		0.2594	0.0308	98.1209
6	0.0766	0.1179	0.046	67.1417	0.112	30.5437	0.0765	0.087	0		0.2668	0.0412	98.0787
7	0.0688	0.1409	0.0424	67.1805	0.1573	30.5974	0.0849	0.0913	0		0.2589	0.026	98.2523
8	0.0744	0.1274	0.0418	66.9548	0.166	30.446	0.1102	0.0992	0.0062		0.2349	0.0088	97.9036
9	0.0578	0.1509	0.0462	67.0708	0.1446	30.457	0.1346	0.0885	0		0.2496	0.0568	98.0464
10	0.0596	0.103	0.0376	66.9542	0.1753	30.4312	0.0555	0.098	0		0.2723	0.0297	97.8172
11	0.0999	0.1328	0.034	67.371	0.1194	30.7129	0.0582	0.0962	0		0.223	0.0336	98.4905
12	0.0716	0.1459	0.3877	66.6706	0.1383	30.6183	0.0861	0.0853	0		0.2794	0.0458	97.7444
13	0.074	0.4581	0.0445	66.2212	0.1321	30.647	0.1292	0.1001	0.0044		0.3131	0.0793	97.6877
14	0.1402	0.1955	0.0804	66.4896	0.2374	30.5699	0.1215	0.105	0		0.23	0	97.7189
15	0.0641	0.1275	0.0784	66.4896	0.1689	30.5699	0.1093	0.14	0		0.3075	0.0388	97.6052
Average	0.0856133	0.21196	0.125	66.6484	0.15922	30.6236	0.10086	0.10532	0.00088		0.2706	0.0395	97.8493
Std Dev	0.0275021	0.140196	0.148268	0.434628	0.0473408	0.0598374	0.0288883	0.0207004	0.00196774		0.0423067	0.0283693	0.362232
													*Total includes sum of only those elements reported as accepted values for the standard
Magnetite Standard Accepted Values (USNM 114887 Minas Gerais, Brazil)
Fe2O3	67.5
FeO	30.2
MgO	0.05
TiO2	0.16
MnO	<0.01
Cr2O3	0.25
Total	98.16

## Sheet: ILMN Std
Ilmenite Standard (USNM 96189 Ilmen Mountains, Russia) Analyzed as Unknown
Analysis	SiO2	TiO2	Al2O3	Fe2O3	Cr2O3	FeO	MnO	MgO	CaO	V2O3	NiO	Total*
1	0.0224	45.8177	0	11.9659	0	36.0473	4.5741	0.3128	0.0041	0.1916	0.0535	98.7178
2	0	45.2976	0	13.6366	0.0349	35.7817	4.3638	0.2993	0.0104	0.2483	0	99.379
3	0.004	45.9359	0	12.0861	0.027	36.0733	4.6218	0.3182	0.0044	0.2133	0.0392	99.0353
4	0	46.3324	0	10.9889	0.0004	36.5273	4.537	0.3123	0	0.2554	0	98.6979
5	0.0017	46.2099	0	11.3509	0.0107	36.3195	4.64	0.3059	0.0052	0.2296	0.0028	98.8263
6	0	45.6108	0	12.2668	0.0202	36.0534	4.3603	0.3144	0	0.2199	0.041	98.6056
7	0	45.9092	0	11.9545	0.0203	36.0987	4.5738	0.3084	0.0137	0.2229	0.0108	98.8446
8	0.0008	45.7122	0	12.8814	0.0071	36.0471	4.4808	0.3008	0.0005	0.2464	0	99.4223
9	0.0015	46.0075	0	11.6432	0.0115	36.1078	4.6649	0.3105	0.0021	0.2214	0	98.7338
10	0.0027	45.8471	0	11.8932	0.0135	36.1084	4.5387	0.3032	0	0.2739	0.033	98.6906
11	0	44.0025	0	15.5842	0.0023	34.7189	4.2897	0.2898	0.0024	0.218	0	98.8851
12	0.0205	45.9319	0	11.6062	0.0035	36.1986	4.5336	0.3076	0.0037	0.2143	0.0509	98.5778
13	0	45.8503	0	11.9729	0.0153	36.0783	4.5621	0.3066	0	0.2173	0.0203	98.7702
14	0.0072	44.02	0	15.7827	0.0485	34.6111	4.3785	0.3152	0	0.2231	0	99.1075
15	0	45.9717	0	12.0904	0.0271	36.1655	4.4987	0.3298	0	0.2645	0	99.0562
16	0.0366	45.9889	0	11.5203	0	36.2451	4.4568	0.3196	0.0174	0.2557	0	98.5307
17	0.0163	45.8248	0	11.7496	0.0212	36.0883	4.4728	0.3312	0.0111	0.1824	0	98.4667
18	0	46.2282	0	11.7692	0.0129	36.4561	4.4856	0.2981	0	0.3244	0.0278	99.2372
Average	0.00631667	45.6944	0	12.3746	0.0153556	35.9848	4.50183	0.310206	0.00416667	0.234578	0.0155167	98.8658
Std Dev	0.0105439	0.65489	0	1.33415	0.0131877	0.508092	0.103069	0.0105485	0.00540501	0.0329047	0.0199046	0.283491
												*Total includes sum of only those elements reported as accepted values for the standard
Ilmenite Std Accepted Values (USNM 96189 Ilmen Mountains, Russia)
Fe2O3	11.6
FeO	36.1
MgO	0.31
TiO2	45.7
MnO	4.77
Nb2O5	0.92
Total	99.4
Total minus Nb	98.48
