# Supplementary material
Source: publisher figshare collection journal article supplement (https://gsapubs.figshare.com/ndownloader/files/22411428)
Supplement: Supplementary file 1 [file 22411428 › Supplement 3_Steens Basalt Whole Rock & Location data.xls]

## Sheet: Major & Trace by XRF & ICPMS
Sample	NMSB-1	NMSB-2	NMSB-2(R)	NMSB-3	NMSB-4	NMSB-5	NMSB-6	NMSB-7	NMSB-8	NMSB-9	NMSB-11	NMSB-13	NMSB-14	NMSB-15	NMSB-16	NMSB-17	NMSB-18	NMSB-19	NMSB-20A	NMSB-21	NMSB-22	NMSB-23	NMSB-24	NMSB-25	NMSB-26	NMSB-28	NMSB-28(R)	NMSB-31	NMSB-32	NMSB-33	NMSB-34	NMSB-35	NMSB-36	NMSB-37	NMSB-38	NMSB-39	NMSB-40	NMSB-41	NMSB-42	NMSB-43	NMSB-45	NMSB-46	NMSB-47	NMSB-48	NMSB-50	NMSB-50(R)	NMSB-51	NMSB-52	NMSB-53
Section	Upper	Upper	Upper	Upper	Upper	Lower B	Lower B	Lower B	Lower B	Lower B	Lower B	Lower B	Lower B	Lower B	Lower B	Lower B	Lower B	Lower B	Lower B	Lower B	Dike	Dike	Lower B	Dike	Dike	Dike	Dike	Lower B	Dike	Lower B	Lower B	Lower B	Lower B	Lower B	Lower B	Lower B	Lower B	Lower B	Lower B	Lower B	Lower B	Lower B	Lower B	Dike	Dike	Dike	Lower B	Lower B	Lower A
Elevation (m)	1587.97	1674.01	1674.01	1674.88	1680.98	1999.65	2007.58	2027.53	2028.14	2041.95	2075.6	2065.26	2085.93	2094.1	2096.57	2096.75	2097.63	2121.5	2215.95	2218.64	1388.74	1512.75	2074.39	2075.84	2078.74	2080.87	2080.87	2129.67	2058.01	2029.69	1951.11	1949.2	1471.41	1485.29	1488.24	1558.65	1566.82	1591.58	1647.09	1793.44	1294.49	1326.01	1400.76	1464.92	1896.55	1896.55	1971.05	2000.85	1552.16
Strat Height (m)	1157	1243	1244	1244	1250	432.036	439.967	459.914	460.522	474.333	508	497.645	518.313	526.484	528.95	529.128	530.016	553.882	648.331	651.022	n/a	n/a	628.698	n/a	n/a	n/a	n/a	684	n/a	583.997	505.41	503.499	427.487	441.365	444.31	507	515	540	596	741	1107	1138	1213	n/a	n/a	n/a	525.357	555.157	106.465
Latitude (WSG84)	42.5456	42.5435	42.5435	42.5435	42.5429	42.5962	42.5961	42.5959	42.5959	42.596	42.5967	42.5984	42.5984	42.5984	42.5985	42.5986	42.5986	42.5995	42.6001	42.6001	42.5469	42.5544	42.5805	42.5823	42.5822	42.583	42.583	42.5843	42.5827	42.5815	42.578	42.578	42.3238	42.3236	42.324	42.682	42.6824	42.6827	42.6844	42.6847	42.6591	42.66	42.6624	42.3801	42.5822	42.5822	42.5854	42.5856	42.5494
Longitude (WSG84)	-118.565	-118.566	-118.566	-118.566	-118.566	-118.55	-118.55	-118.55	-118.55	-118.55	-118.551	-118.556	-118.556	-118.556	-118.556	-118.556	-118.556	-118.563	-118.564	-118.564	-118.546	-118.558	-118.589	-118.588	-118.588	-118.587	-118.587	-118.586	-118.585	-118.584	-118.585	-118.585	-118.692	-118.692	-118.693	-118.51	-118.511	-118.511	-118.512	-118.518	-118.416	-118.414	-118.413	-118.663	-118.598	-118.598	-118.595	-118.594	-118.607
UTM East	371538	371394	371394	371394	371406	372873	372856	372823	372823	372802	372716	372365	372348	372336	372324	372316	372316	371805	371728	371728	373073	372071	369598	369702	369779	369771	369771	369843	369959	370019	369943	369948	360617	360487	360487	376269	376244	376226	376108	375676	383969	384125	384224	363105	368861	368861	369125	369166	368075
UTM North	4.71154e+06	4.71131e+06	4.71131e+06	4.71131e+06	4.71124e+06	4.71714e+06	4.71713e+06	4.71711e+06	4.71711e+06	4.71712e+06	4.71719e+06	4.71739e+06	4.71739e+06	4717396	4.7174e+06	4.71741e+06	4.71741e+06	4.71752e+06	4.71759e+06	4.71759e+06	4.71166e+06	4.71251e+06	4715458	4715659	4.71564e+06	4.71573e+06	4.71573e+06	4.71587e+06	4.71569e+06	4.71556e+06	4.71518e+06	4.71517e+06	4.68711e+06	4.68714e+06	4.68714e+06	4.72661e+06	4.72666e+06	4726682	4.72688e+06	4.72692e+06	4.72393e+06	4.72403e+06	4.72429e+06	4.69344e+06	4.71565e+06	4.71565e+06	4.71601e+06	4.71603e+06	4.71203e+06
Unnormalized Major Elements (Weight %):
SiO2	48.3352	52.0118	52.2896	51.7848	51.72	48.6602	48.5624	49.3738	49.9399	49.5131	49.0244	48.7637	48.4802	48.1462	49.2667	49.2073	47.1834	48.6978	50.3156	49.9555	46.9068	46.3569	47.1356	52.1389	48.7752	51.5815	51.8218	47.7897	51.7149	48.2452	46.9882	46.7195	47.3293	47.3038	47.3487	48.763	48.3487	48.7877	48.4749	49.0998	46.5602	47.9678	46.3168	46.4424	47.8738	47.8738	45.0289	47.124	49.9754
TiO2	2.67152	2.62292	2.63744	2.57927	2.57996	2.11008	1.91885	2.4875	1.90597	2.37564	1.80901	1.84243	2.81757	1.64787	1.93692	1.98021	1.75248	1.64035	2.0744	2.75585	2.8171	1.54473	2.48104	2.53332	2.83533	2.48872	2.49809	2.0548	1.7578	1.75087	2.08476	2.04995	1.68167	2.16758	2.1041	2.12708	2.19085	2.28117	2.12336	1.79249	1.70165	2.89846	2.07	2.7718	2.70963	2.70963	2.52228	2.04074	2.48552
Al2O3	15.2184	13.3834	13.4498	13.2888	13.4418	15.0883	14.9079	14.4975	16.9274	14.1584	14.4759	18.4634	13.8927	13.9388	14.4918	14.871	13.4244	14.6567	17.728	14.2449	15.5983	17.2328	14.5703	13.735	14.3853	13.6632	13.6656	16.3145	16.2301	14.3562	14.7021	15.3162	15.0909	17.6613	17.6904	17.0231	17.8605	16.0271	16.598	14.9586	16.2868	16.0059	16.2213	15.5873	15.4749	15.4749	14.3856	16.007	15.2842
FeO*	14.365	13.4277	13.5412	13.3737	13.331	11.7399	10.9993	12.0583	9.86347	11.4817	10.7189	9.89659	12.9923	11.2988	10.8789	10.8468	11.361	10.9102	10.3715	12.8216	14.0293	11.1561	12.0188	12.6776	13.1582	12.5037	12.4108	11.3582	10.0707	10.6308	11.3766	11.1666	10.9084	10.5609	10.492	11.4041	11.1014	11.97	11.4875	10.7728	10.867	11.874	11.8402	13.6343	13.6769	13.6769	12.9276	11.2592	11.6518
MnO	0.20052	0.214346	0.21504	0.216979	0.210859	0.186488	0.183825	0.196678	0.157855	0.186297	0.1709	0.154348	0.205975	0.180247	0.175031	0.177031	0.183322	0.177513	0.16489	0.199563	0.211492	0.17493	0.19104	0.208718	0.209402	0.203693	0.203492	0.178609	0.160478	0.161986	0.213914	0.154278	0.160659	0.153323	0.139052	0.173955	0.172207	0.18497	0.186458	0.173131	0.167262	0.159644	0.162127	0.208447	0.192833	0.192833	0.188608	0.148715	0.204134
MgO	5.39978	3.90159	3.93128	3.80817	3.95974	8.53087	8.20522	6.54275	6.04047	6.68646	9.71165	6.02988	6.01997	10.2883	8.02242	7.01705	10.6154	9.42015	4.83189	5.33806	5.85904	8.15145	6.46866	4.17238	4.86135	4.15304	4.17619	6.91274	5.22498	8.7987	7.38295	7.23083	8.72286	4.99698	4.88261	5.58956	4.76969	5.54184	6.46407	8.83974	7.5329	3.88296	6.48505	5.79616	5.62516	5.62516	6.88581	7.13901	3.99668
CaO	8.58546	7.64492	7.68226	7.61175	7.66021	9.45297	10.3303	10.4757	10.311	10.3373	10.1424	10.6255	9.78277	9.78286	10.0428	10.5109	9.88364	10.5041	9.67697	9.07139	8.14788	10.3575	9.75041	8.0146	8.63699	7.97525	7.98742	9.98686	7.93222	10.2102	9.08543	8.96444	10.8603	9.24401	9.24262	9.79503	10.0543	9.52955	10.466	10.9919	9.85023	8.13637	8.60701	7.86561	8.62351	8.62351	8.25221	9.37268	7.71291
Na2O	3.45181	3.52632	3.52563	3.33309	3.29697	2.87764	2.57406	2.72289	2.96408	2.72607	2.51459	3.01308	2.8963	2.3334	2.60224	2.60491	2.27588	2.37854	3.17716	2.97161	3.41504	2.59969	3.05615	3.35575	3.55744	3.58371	3.57532	3.01896	3.71537	2.4435	2.82983	2.81093	2.34328	3.29323	3.31697	3.29337	3.41573	3.2512	3.09585	2.63154	2.92406	3.70003	3.13573	3.65933	2.89862	2.89862	2.32925	2.65111	3.40843
K2O	1.17481	1.75722	1.76374	1.82067	1.74405	0.744554	0.461777	0.633994	0.732494	0.844321	0.557815	0.506068	0.941705	0.432773	0.777619	0.789036	0.458963	0.514218	1.07342	1.39938	1.17134	0.482882	0.689329	1.46322	1.03512	1.11707	1.12397	0.640878	1.13117	0.333559	0.820984	0.756745	0.500641	0.939484	0.902329	0.715088	0.717741	0.904309	0.602266	0.380111	0.645592	1.50056	0.875857	1.30805	1.29431	1.29431	0.985936	0.65514	1.45025
P2O5	0.41782	0.401136	0.402764	0.399256	0.372453	0.334333	0.239823	0.279239	0.262054	0.259481	0.206507	0.249702	0.392241	0.20507	0.236296	0.246989	0.216577	0.170971	0.291772	0.391216	0.504852	0.18288	0.301048	0.36187	0.520017	0.356594	0.356152	0.24918	0.376262	0.184397	0.304806	0.288586	0.184739	0.368805	0.353348	0.302023	0.314736	0.326	0.2774	0.231391	0.263089	0.609784	0.332776	0.491254	0.459512	0.459512	0.328635	0.233603	0.594252
Mg#	42.6773	36.5278	36.5083	36.0606	37.0398	59.0033	59.6366	51.7994	54.8113	53.5624	64.2154	54.6848	47.8546	64.3301	59.3588	56.1654	64.92	63.1011	47.9907	45.1934	45.2703	59.1367	51.5971	39.4617	42.2548	39.6809	39.9928	54.6573	50.6807	62.1108	56.2428	56.189	61.2972	48.3776	47.9629	49.2584	45.9742	47.8347	52.7074	61.9079	57.8581	39.3089	52.034	45.7109	44.8915	44.8915	51.3373	55.6704	40.4537
Sum	99.8203	98.8914	99.4388	98.2165	98.3171	99.7254	98.3834	99.2683	99.1047	98.5687	99.332	99.5447	98.4217	98.2542	98.4308	98.2512	97.3551	99.0706	99.7057	99.149	98.6611	98.2398	96.6624	98.6615	97.9744	97.6265	97.8189	98.5044	98.314	97.1154	95.7897	95.458	97.7828	96.6894	96.4721	99.1864	98.9458	98.8041	99.776	99.8716	96.7987	96.7355	96.0469	97.7646	98.8292	98.8292	93.8348	96.6312	96.7636
LOI %																																													0.555556	0.555556	5.61574	2.92184	2.1441
Normalized Major Elements (Weight %):
SiO2	48.4222	52.5948	52.5847	52.7252	52.6053	48.7942	49.3604	49.7377	50.391	50.2321	49.354	48.9867	49.2576	49.0016	50.0521	50.0831	48.4653	49.1546	50.4641	50.3842	47.5433	47.1875	48.7631	52.8463	49.7837	52.8356	52.9773	48.5153	52.6018	49.6782	49.0535	48.9424	48.4025	48.9234	49.0801	49.163	48.8638	49.3782	48.5838	49.163	48.1	49.5866	48.2231	47.5043	48.4409	48.4409	47.9874	48.7668	51.6469
TiO2	2.67633	2.65232	2.65233	2.62611	2.62412	2.11589	1.95038	2.50583	1.92319	2.41014	1.82117	1.85085	2.86275	1.67715	1.9678	2.01546	1.80009	1.65574	2.08052	2.77951	2.85532	1.5724	2.56671	2.56769	2.89395	2.54923	2.55379	2.086	1.78794	1.80288	2.1764	2.14749	1.7198	2.2418	2.18104	2.14453	2.21419	2.30878	2.12813	1.79479	1.75792	2.99627	2.15519	2.83518	2.74173	2.74173	2.688	2.11189	2.56865
Al2O3	15.2458	13.5335	13.5257	13.5301	13.6719	15.1299	15.1528	14.6044	17.0804	14.364	14.5733	18.5479	14.1155	14.1864	14.7229	15.1357	13.7891	14.7942	17.7804	14.3672	15.81	17.5415	15.0734	13.9213	14.6827	13.9953	13.9704	16.5622	16.5084	14.7826	15.3484	16.045	15.4331	18.266	18.3373	17.1628	18.0508	16.2211	16.6353	14.9778	16.8254	16.546	16.889	15.9437	15.6582	15.6582	15.3307	16.5651	15.7954
FeO*	14.3908	13.5782	13.6177	13.6166	13.5592	11.7722	11.18	12.1472	9.95258	11.6484	10.791	9.94185	13.2007	11.4995	11.0524	11.0399	11.6697	11.0126	10.4021	12.9316	14.2197	11.3559	12.4338	12.8496	13.4302	12.8077	12.6876	11.5307	10.2434	10.9466	11.8767	11.6979	11.1557	10.9225	10.8757	11.4976	11.2196	12.1148	11.5133	10.7866	11.2264	12.2747	12.3275	13.946	13.8389	13.8389	13.777	11.6517	12.0415
MnO	0.200881	0.216749	0.216253	0.22092	0.214468	0.187001	0.186845	0.198128	0.159281	0.189002	0.172049	0.155054	0.209278	0.183449	0.177821	0.180182	0.188303	0.179178	0.165377	0.201276	0.214362	0.178065	0.197637	0.21155	0.213731	0.208646	0.20803	0.18132	0.16323	0.166797	0.223317	0.161618	0.164302	0.158573	0.144137	0.175382	0.174041	0.187209	0.186876	0.173354	0.172794	0.165032	0.168799	0.213213	0.195118	0.195118	0.201	0.1539	0.210962
MgO	5.4095	3.94533	3.95347	3.87732	4.02752	8.55436	8.34004	6.59098	6.09504	6.78355	9.77695	6.05746	6.11651	10.4711	8.15032	7.14195	10.9038	9.50852	4.84615	5.38388	5.93855	8.2975	6.69202	4.22899	4.96185	4.25401	4.2693	7.0177	5.31459	9.06005	7.70746	7.57488	8.92065	5.16808	5.06116	5.63541	4.82051	5.60892	6.47858	8.85111	7.78202	4.014	6.75196	5.92868	5.6918	5.6918	7.33823	7.38789	4.13035
CaO	8.60091	7.73063	7.72562	7.74997	7.79133	9.479	10.5	10.5529	10.4041	10.4874	10.2106	10.6741	9.93965	9.95668	10.2029	10.698	10.1522	10.6027	9.70554	9.14925	8.25845	10.5431	10.0871	8.12334	8.81556	8.16914	8.16552	10.1385	8.06826	10.5134	9.48477	9.39097	11.1066	9.56052	9.58061	9.87538	10.1614	9.64489	10.4895	11.0061	10.176	8.41095	8.96126	8.04546	8.72567	8.72567	8.7944	9.69943	7.97088
Na2O	3.45802	3.56586	3.54553	3.39362	3.35341	2.88556	2.61635	2.74296	2.99085	2.76566	2.5315	3.02686	2.94275	2.37486	2.64372	2.65128	2.33771	2.40086	3.18654	2.99712	3.46138	2.64627	3.16168	3.40127	3.63099	3.67084	3.65504	3.0648	3.77909	2.51607	2.95421	2.94468	2.39641	3.40599	3.43827	3.32039	3.45212	3.29055	3.1028	2.63493	3.02076	3.82489	3.26479	3.743	2.93296	2.93296	2.48229	2.74353	3.52243
K2O	1.17692	1.77692	1.7737	1.85373	1.7739	0.746604	0.469365	0.638667	0.739112	0.856581	0.561566	0.508382	0.956807	0.440463	0.790016	0.80308	0.471432	0.519042	1.07659	1.41139	1.18723	0.491534	0.713131	1.48307	1.05652	1.14423	1.14903	0.650609	1.15057	0.343467	0.85707	0.792751	0.511993	0.971652	0.935326	0.720954	0.725388	0.915254	0.603619	0.3806	0.666942	1.55119	0.911906	1.33796	1.30964	1.30964	1.05071	0.67798	1.49876
P2O5	0.418572	0.405633	0.405037	0.406506	0.378828	0.335254	0.243764	0.281297	0.264421	0.263249	0.207896	0.250844	0.398532	0.208714	0.240063	0.251385	0.222461	0.172575	0.292633	0.394574	0.511703	0.186157	0.311443	0.36678	0.530769	0.365264	0.364093	0.252963	0.382715	0.189874	0.318204	0.302317	0.188928	0.381433	0.366269	0.3045	0.318089	0.330182	0.278023	0.231689	0.27179	0.630362	0.346472	0.502486	0.464956	0.464956	0.350228	0.241747	0.614128
Total	100	100	100	100	100	100	100	100	100	100	100	100	100	100	100	100	100	100	100	100	100	100	100	100	100	100	100	100	100	100	100	100	100	100	100	100	100	100	100	100	100	100	100	100	100	100	100	100	100
Unnormalized Trace Elements (ppm):
Ni	78.4	12.7635	16.08	15.1755	15.9795	232.959	195.171	99.897	124.519	104.118	278.083	126.228	91.9575	254.365	174.87	141.202	301.6	247.531	75.2745	63.0135	101.706	164.117	106.832	25.6275	48.039	26.934	27.738	129.645	93.5655	223.411	165.322	159.795	171.955	75.978	72.4605	109.243	77.184	98.1885	104.52	153.865	162.006	39.0945	133.564	100.5	109.04	109.04	83.725	144.648	43.316
Cr	58.4	68.139	68.34	69.4455	74.772	554.157	506.118	318.886	245.22	288.234	518.077	191.05	361.096	635.863	460.993	384.412	812.14	533.655	101.706	118.288	43.617	49.044	255.471	54.1695	40.3005	57.084	56.1795	199.392	45.627	441.295	175.071	168.739	435.366	85.626	93.063	127.635	85.5255	127.434	197.181	359.488	115.977	9.9495	48.642	45.024	72.7915	72.7915	166.859	156.408	20.776
Sc	32	41.004	38.8935	39.4965	40.2	28.6425	31.557	34.773	26.934	34.572	29.8485	24.4215	35.577	30.8535	30.753	32.0595	30.2505	30.351	24.12	33.2655	28.341	30.753	33.366	37.587	33.366	37.2855	37.386	28.0395	23.517	31.4565	25.125	25.929	35.4765	24.924	25.2255	29.2455	27.738	27.8385	31.557	30.4515	28.743	28.2405	27.135	28.743	30.2395	30.2395	31.323	28.028	27.048
V	420.3	418.08	418.08	401.598	420.09	295.47	307.63	380.091	281.4	386.422	300.394	293.761	425.115	282.907	316.675	307.932	297.982	296.173	304.816	405.417	386.724	290.646	378.584	423.909	425.919	418.08	420.19	330.142	260.496	302.907	317.077	315.067	346.725	306.525	303.51	334.665	356.373	351.549	363.207	279.892	302.002	346.926	314.766	380.794	379.028	379.028	367.109	325.066	305.368
Ba	485.9	586.618	585.111	596.367	615.562	302.907	302.706	229.14	218.386	223.612	174.568	220.095	326.424	179.493	222.406	218.185	184.819	127.333	306.223	414.663	456.973	219.592	230.648	548.73	456.571	555.966	555.966	192.055	570.237	140.298	267.531	250.848	175.875	336.072	336.373	294.364	275.772	316.675	211.854	167.534	265.421	543.404	329.941	469.234	432.218	432.218	297.962	193.648	613.578
Rb	19.2	37.989	37.386	40.5015	39.2955	10.1505	6.7335	11.256	14.1705	16.5825	10.7535	6.9345	15.5775	5.628	15.7785	16.884	8.1405	9.7485	22.6125	28.6425	19.1955	7.236	9.246	36.4815	28.542	34.974	35.175	9.246	40.803	4.422	18.1905	13.3665	8.5425	18.1905	17.688	10.854	9.1455	15.1755	7.437	4.5225	9.045	29.6475	13.668	23.8185	28.959	28.959	14.184	12.838	36.946
Sr	466.6	359.287	360.192	358.383	367.629	421.396	364.513	352.353	382.302	334.966	307.832	509.635	395.97	343.911	341.901	353.458	319.69	260.295	469.034	393.457	461.998	462.099	337.178	390.844	423.105	384.915	385.216	358.383	478.38	261.4	408.834	415.065	373.357	513.856	526.017	470.139	519.183	445.617	459.988	416.874	536.67	493.053	490.942	470.943	444.728	444.728	304.168	361.62	488.628
Zr	184.3	211.15	209.743	213.663	209.341	159.694	144.82	185.422	158.991	172.759	130.75	130.549	207.532	116.982	146.127	149.845	129.846	115.273	159.493	211.351	214.668	89.3445	172.96	187.734	224.718	184.819	185.523	144.519	173.965	120.6	156.378	148.237	95.5755	160.096	154.87	156.177	146.629	169.543	139.594	118.389	107.635	245.923	146.529	209.341	201.9	201.9	172.8	134.026	228.452
Y	34.5	41.004	41.1045	43.215	40.2	29.145	27.135	34.6725	29.0445	31.959	26.4315	24.6225	37.989	23.517	27.0345	28.4415	24.723	24.2205	30.0495	39.195	38.6925	22.4115	32.763	37.8885	41.7075	37.587	36.6825	28.2405	30.15	26.4315	27.8385	27.537	22.4115	29.2455	28.542	30.351	29.547	32.2605	29.346	24.8235	24.8235	42.9135	28.4415	38.2905	37.7255	37.7255	32.505	25.186	40.278
Nb	10.3	13.065	12.1605	12.3615	12.462	12.1605	9.7485	12.1605	9.849	11.055	9.849	9.849	13.869	8.7435	9.7485	9.7485	8.7435	6.633	10.3515	14.3715	13.1655	8.241	11.3565	10.452	15.075	10.251	11.256	9.246	10.251	8.241	11.3565	10.854	5.3265	11.457	10.7535	9.5475	9.9495	11.457	9.246	10.452	6.7335	16.08	10.251	13.668	11.82	11.82	10.7365	8.036	14.014
Ga	21.9	22.2105	22.512	23.517	22.713	19.7985	18.5925	19.5975	20.904	19.899	18.1905	20.6025	21.4065	16.08	19.3965	19.9995	15.879	17.286	20.8035	20.502	23.517	18.09	20.301	21.6075	22.914	21.4065	22.0095	20.2005	20.4015	18.1905	19.3965	20.301	19.095	21.6075	21.6075	21.8085	21.2055	22.0095	19.5975	17.3865	19.698	23.0145	20.904	22.2105	21.473	21.473	20.488	20.776	20.58
Cu	317.8	203.412	204.517	215.773	184.216	140.197	164.82	197.583	154.971	207.733	102.309	134.971	242.707	177.382	129.544	194.266	140.097	98.9925	160.599	204.316	308.334	165.925	227.733	242.607	289.038	236.879	237.381	198.487	153.664	100.399	186.226	177.784	149.544	216.678	224.416	201.301	162.91	147.635	185.523	57.084	159.996	225.823	223.009	300.093	312.541	312.541	247.137	190.904	212.366
Zn	133.7	134.871	134.067	136.077	136.579	106.832	95.877	107.032	87.7365	104.922	90.45	87.7365	122.007	91.1535	95.877	94.3695	95.9775	88.038	97.083	119.293	136.479	86.9325	110.248	131.052	132.66	130.047	131.052	97.887	105.826	89.244	109.042	101.605	86.43	102.309	100.299	103.012	103.917	113.364	101.203	96.3795	96.48	128.539	113.263	133.263	128.346	128.346	113.373	93.982	116.13
Pb	4.8	7.437	6.633	6.834	8.04	3.1155	2.9145	2.1105	2.211	3.417	1.608	2.211	3.3165	1.5075	3.417	2.412	2.01	2.3115	3.7185	4.623	3.015	0.5025	2.5125	5.829	5.226	7.3365	8.04	2.814	6.231	1.9095	2.5125	2.9145	2.3115	3.417	3.417	4.02	2.3115	3.9195	3.3165	1.005	3.1155	5.7285	3.618	3.3165	4.4325	4.4325	3.6445	1.47	7.448
La	21.8	22.8135	23.4165	21.4065	22.0095	15.879	10.653	14.472	11.859	11.658	8.7435	13.869	22.512	12.1605	12.1605	15.678	12.864	8.442	16.7835	19.9995	19.095	6.633	13.266	16.08	25.125	18.492	17.889	10.452	18.894	8.1405	10.9545	10.9545	6.3315	18.492	12.9645	14.3715	14.1705	14.673	13.3665	13.266	10.854	26.331	15.1755	22.8135	21.7685	21.7685	12.1155	11.172	26.068
Ce	45.6	50.652	49.3455	50.652	45.1245	36.582	25.527	42.3105	34.572	41.205	26.4315	28.542	40.2	23.0145	35.175	31.2555	26.4315	21.306	36.2805	44.9235	50.853	21.708	39.597	41.9085	57.888	47.637	44.22	29.145	45.9285	28.944	35.4765	40.0995	20.4015	43.9185	39.798	39.798	30.6525	36.6825	33.165	23.4165	31.8585	61.8075	38.793	51.858	53.781	53.781	37.036	32.438	65.17
Th	1.3	4.1205	3.3165	3.7185	3.7185	3.1155	2.412	2.01	2.1105	1.9095	2.1105	3.015	2.412	0.603	2.211	1.9095	1.206	1.5075	2.9145	3.9195	1.7085	2.01	1.7085	3.618	2.613	4.221	3.3165	0.402	3.3165	1.9095	1.7085	1.407	1.3065	1.608	1.9095	1.809	1.206	2.211	1.206	1.407	1.5075	2.5125	1.809	2.814	3.8415	3.8415	2.364	1.666	3.626
Nd	27.7	31.557	29.547	31.155	29.6475	22.8135	16.3815	24.522	20.6025	24.522	16.3815	17.3865	27.6375	15.276	20.8035	20.301	19.7985	12.9645	21.909	27.4365	35.6775	10.251	24.4215	25.4265	32.0595	30.0495	25.4265	18.9945	24.2205	16.1805	23.0145	23.115	13.7685	23.6175	24.8235	24.6225	21.105	24.723	20.2005	15.1755	17.1855	37.2855	22.2105	32.2605	32.899	32.899	23.7385	19.796	36.946
U	1.7	2.412	2.1105	2.211	2.412	1.206	0.5025	1.608	0.3015	1.407	0.5025	0	0.7035	0.1005	2.3115	1.206	0	0.3015	1.5075	1.3065	0.5025	0.9045	1.206	1.206	1.407	1.9095	1.1055	2.01	1.809	0.7035	0	0	0.201	1.005	1.407	1.5075	0	0.201	1.1055	0.402	0.804	1.407	1.1055	1.005	2.8565	2.8565	1.2805	0.686	0.98
sum tr.	2366.2	2268.59	2262.56	2281.55	2289.99	2396.22	2233.81	2069.9	1826.08	2020.95	2053.32	1845.48	2394.01	2219.54	2067.18	2023.57	2432.2	1902.36	1865.28	2167.99	2344.26	1656.44	2009.4	2242.76	2306.27	2245.87	2241.75	1809.3	2107.28	1826.08	1961.06	1913.62	1970	1994.62	1999.15	1984.47	1894.53	1961.16	1932.61	1791.81	1900.56	2307.68	1983.77	2349.99	2330.39	2330.39	1942.55	1762.39	2307.72
in %	0.23662	0.226859	0.226256	0.228155	0.228999	0.239622	0.223381	0.20699	0.182608	0.202095	0.205332	0.184548	0.239401	0.221954	0.206718	0.202357	0.24322	0.190236	0.186528	0.216799	0.234426	0.165644	0.20094	0.224276	0.230627	0.224587	0.224175	0.18093	0.210728	0.182608	0.196106	0.191362	0.197	0.199462	0.199915	0.198447	0.189453	0.196116	0.193261	0.179181	0.190056	0.230768	0.198377	0.234999	0.233039	0.233039	0.194255	0.176239	0.230772
sum m+tr	100.057	99.1182	99.6651	98.4447	98.5461	99.965	98.6068	99.4753	99.2873	98.7708	99.5374	99.7293	98.6611	98.4762	98.6375	98.4535	97.5983	99.2608	99.8922	99.3658	98.8955	98.4055	96.8633	98.8857	98.205	97.8511	98.0431	98.6853	98.5247	97.298	95.9858	95.6494	97.9798	96.8889	96.672	99.3848	99.1353	99.0002	99.9692	100.051	96.9888	96.9663	96.2453	97.9996	99.0622	99.0622	94.0291	96.8074	96.9944
M+Toxides	100.119	99.1778	99.7245	98.5041	98.6059	100.039	98.6764	99.5397	99.3413	98.8334	99.6046	99.7818	98.7339	98.5492	98.7031	98.5162	97.6809	99.3252	99.9425	99.4259	98.9572	98.4505	96.9247	98.9447	98.2667	97.9098	98.1018	98.7395	98.5751	97.3586	96.0416	95.704	98.0433	96.9415	96.7248	99.4398	99.1875	99.0549	100.026	100.107	97.0404	97.0239	96.2974	98.0609	99.1241	99.1241	94.0858	96.8592	97.05
w/LOI	100.119	99.1778	99.7245	98.5041	98.6059	100.039	98.6764	99.5397	99.3413	98.8334	99.6046	99.7818	98.7339	98.5492	98.7031	98.5162	97.6809	99.3252	99.9425	99.4259	98.9572	98.4505	96.9247	98.9447	98.2667	97.9098	98.1018	98.7395	98.5751	97.3586	96.0416	95.704	98.0433	96.9415	96.7248	99.4398	99.1875	99.0549	100.026	100.107	97.0404	97.0239	96.2974	98.0609	99.6796	99.6796	99.7015	99.7811	99.1941
if Fe3+	101.714	100.668	101.228	99.9886	100.086	101.342	99.8973	100.878	100.436	100.108	100.794	100.88	100.176	99.8034	99.9106	99.7202	98.942	100.536	101.094	100.849	100.514	99.6888	98.2588	100.352	99.7272	99.2977	99.4794	100	99.6929	98.5387	97.3044	96.9435	99.2541	98.1138	97.8894	100.706	100.42	100.384	101.301	101.302	98.2466	98.3419	97.6117	99.5744	101.198	101.198	101.136	101.031	100.487
NiO	99.766	16.2419	20.4622	19.3112	20.3343	296.446	248.36	127.122	158.454	132.493	353.868	160.628	117.018	323.687	222.527	179.684	383.794	314.99	95.7888	80.1863	129.424	208.843	135.946	32.6117	61.1309	34.2742	35.2973	164.977	119.065	284.297	210.377	203.343	218.818	96.684	92.2079	139.015	98.2186	124.947	133.004	195.798	206.157	49.7488	169.964	127.889	138.756	138.756	106.542	184.068	55.1207
Cr2O3	85.3559	99.5902	99.884	101.5	109.285	809.941	739.729	466.076	358.407	421.275	757.209	279.234	527.769	929.362	673.776	561.847	1187	779.976	148.651	172.887	63.7495	71.6814	373.39	79.1727	58.9022	83.4325	82.1105	291.426	66.6872	644.986	255.879	246.625	636.32	125.149	136.018	186.548	125.002	186.254	288.195	525.419	169.509	14.5419	71.0939	65.8059	106.39	106.39	243.877	228.602	30.3657
Sc2O3	49.0834	62.8942	59.657	60.5819	61.661	43.9335	48.4039	53.3368	41.3129	53.0284	45.7833	37.459	54.57	47.3248	47.1707	49.1746	46.3999	46.554	36.9966	51.0245	43.471	47.1707	51.1786	57.653	51.1786	57.1906	57.3447	43.0085	36.0717	48.2497	38.5381	39.7713	54.4158	38.2298	38.6923	44.8584	42.5461	42.7002	48.4039	46.7082	44.0876	43.3168	41.6212	44.0876	46.383	46.383	48.045	42.9909	41.4877
V2O3	618.313	615.048	615.048	590.8	618.004	434.673	452.563	559.161	413.974	568.475	441.918	432.16	625.397	416.192	465.869	453.006	438.369	435.708	448.423	596.419	568.919	427.576	556.943	623.623	626.58	615.048	618.152	485.681	383.222	445.614	466.46	463.503	510.075	450.936	446.501	492.334	524.269	517.172	534.323	411.757	444.283	510.371	463.06	560.196	557.597	557.597	540.064	478.212	449.234
BaO	542.507	654.959	653.276	665.843	687.275	338.195	337.971	255.835	243.828	249.663	194.906	245.736	364.452	200.404	248.317	243.604	206.351	142.168	341.898	462.971	510.211	245.175	257.518	612.657	509.762	620.736	620.736	214.43	636.669	156.643	298.698	280.072	196.364	375.224	375.561	328.658	307.899	353.568	236.535	187.051	296.342	606.71	368.379	523.9	482.571	482.571	332.675	216.208	685.059
Rb2O	20.9971	41.5448	40.8853	44.2924	42.9736	11.1006	7.36376	12.3096	15.4969	18.1346	11.76	7.58357	17.0356	6.15478	17.2554	18.4643	8.90245	10.661	24.729	31.3234	20.9922	7.91329	10.1114	39.8962	31.2135	38.2476	38.4674	10.1114	44.6222	4.8359	19.8931	14.6176	9.34208	19.8931	19.3436	11.8699	10.0015	16.5959	8.1331	4.94581	9.89161	32.4225	14.9473	26.0479	31.6696	31.6696	15.5116	14.0396	40.4041
SrO	551.804	424.896	425.965	423.826	434.761	498.346	431.076	416.695	452.113	396.134	364.044	602.698	468.277	406.711	404.334	418.002	378.068	307.827	554.682	465.305	546.363	546.481	398.748	462.215	500.367	455.203	455.56	423.826	565.735	309.134	483.49	490.859	441.535	607.69	622.071	555.99	613.989	526.99	543.985	492.998	634.67	583.088	580.592	556.94	525.938	525.938	359.711	427.654	577.855
ZrO2	248.952	285.222	283.322	288.616	282.779	215.715	195.624	250.469	214.765	233.364	176.618	176.346	280.335	158.019	197.388	202.411	175.396	155.711	215.444	285.494	289.974	120.687	233.635	253.591	303.549	249.654	250.605	195.216	234.993	162.907	211.235	200.239	129.103	216.258	209.199	210.964	198.067	229.019	188.564	159.92	145.394	332.194	197.931	282.779	272.727	272.727	233.418	181.043	308.593
Y2O3	43.8133	52.0731	52.2007	54.8809	51.052	37.0127	34.4601	44.0324	36.8851	40.5864	33.5667	31.2694	48.2442	29.8654	34.3325	36.1193	31.397	30.7588	38.1614	49.7757	49.1376	28.4615	41.6074	48.1165	52.9665	47.7337	46.585	35.8641	38.289	33.5667	35.3535	34.9706	28.4615	37.1404	36.2469	38.5443	37.5232	40.9693	37.268	31.5246	31.5246	54.498	36.1193	48.6271	47.9095	47.9095	41.2798	31.985	51.1511
Nb2O5	14.7346	18.69	17.3961	17.6837	17.8274	17.3961	13.9456	17.3961	14.0894	15.8146	14.0894	14.0894	19.8402	12.508	13.9456	13.9456	12.508	9.48879	14.8083	20.559	18.8338	11.7891	16.246	14.952	21.5654	14.6645	16.1022	13.2268	14.6645	11.7891	16.246	15.5271	7.61979	16.3897	15.3833	13.6581	14.2332	16.3897	13.2268	14.952	9.63256	23.0031	14.6645	19.5527	16.909	16.909	15.359	11.4958	20.0476
Ga2O3	29.4387	29.8561	30.2614	31.6124	30.5316	26.6138	24.9927	26.3436	28.0999	26.7489	24.4523	27.6946	28.7753	21.6153	26.0734	26.884	21.3451	23.2364	27.9648	27.5595	31.6124	24.3172	27.2893	29.0455	30.8018	28.7753	29.5859	27.1542	27.4244	24.4523	26.0734	27.2893	25.6681	29.0455	29.0455	29.3157	28.5052	29.5859	26.3436	23.3715	26.4787	30.9369	28.0999	29.8561	28.8647	28.8647	27.5407	27.9278	27.6643
CuO	397.818	254.628	256.012	270.102	230.6	175.497	206.319	247.332	193.991	260.038	128.069	168.955	303.818	222.045	162.162	243.18	175.371	123.917	201.036	255.761	385.968	207.703	285.073	303.692	361.814	296.521	297.15	248.464	192.355	125.679	233.116	222.548	187.197	271.235	280.921	251.986	203.929	184.807	232.235	71.457	200.281	282.683	279.16	375.652	391.234	391.234	309.362	238.971	265.837
ZnO	166.424	167.882	166.881	169.383	170.009	132.98	119.344	133.23	109.211	130.603	112.589	109.211	151.87	113.464	119.344	117.467	119.469	109.586	120.845	148.492	169.884	108.21	137.233	163.128	165.13	161.877	163.128	121.846	131.729	111.087	135.732	126.475	107.585	127.35	124.848	128.226	129.352	141.111	125.974	119.969	120.095	160.001	140.986	165.881	159.759	159.759	141.123	116.985	144.554
PbO	5.17067	8.01131	7.14523	7.36175	8.66088	3.35609	3.13957	2.27348	2.38174	3.68087	1.73218	2.38174	3.57261	1.62391	3.68087	2.59826	2.16522	2.49	4.00566	4.98001	3.24783	0.541305	2.70652	6.27914	5.62957	7.90305	8.66088	3.03131	6.71218	2.05696	2.70652	3.13957	2.49	3.68087	3.68087	4.33044	2.49	4.22218	3.57261	1.08261	3.35609	6.17088	3.8974	3.57261	4.77479	4.77479	3.92594	1.58352	8.02316
La2O3	25.5665	26.7551	27.4623	25.105	25.8122	18.6225	12.4936	16.9724	13.9079	13.6722	10.2541	16.2652	26.4015	14.2615	14.2615	18.3867	15.0866	9.90056	19.6832	23.4549	22.3941	7.77901	15.558	18.8582	29.4659	21.6869	20.9797	12.2578	22.1584	9.54696	12.8471	12.8471	7.42542	21.6869	15.2044	16.8545	16.6188	17.2081	15.6759	15.558	12.7293	30.8803	17.7974	26.7551	25.5295	25.5295	14.2087	13.1022	30.5719
CeO2	56.0539	62.2641	60.6581	62.2641	55.4694	44.9685	31.3791	52.0103	42.4977	50.6514	32.491	35.0853	49.416	28.2906	43.239	38.4209	32.491	26.1905	44.5979	55.2223	62.5112	26.6846	48.6747	51.5161	71.159	58.5579	54.3576	35.8266	56.4577	35.5795	43.6096	49.2924	25.0786	53.9869	48.9218	48.9218	37.6797	45.0921	40.7682	28.7848	39.1622	75.9771	47.6864	63.7466	66.1105	66.1105	45.5266	39.8745	80.1104
ThO2	1.43446	4.54669	3.65953	4.10311	4.10311	3.43774	2.66148	2.2179	2.32879	2.107	2.32879	3.32685	2.66148	0.665369	2.43969	2.107	1.33074	1.66342	3.21595	4.3249	1.88521	2.2179	1.88521	3.99221	2.88327	4.65758	3.65953	0.443579	3.65953	2.107	1.88521	1.55253	1.44163	1.77432	2.107	1.99611	1.33074	2.43969	1.33074	1.55253	1.66342	2.77237	1.99611	3.10506	4.23883	4.23883	2.60851	1.83832	4.00104
Nd2O3	32.309	36.8077	34.4633	36.3389	34.5805	26.6094	19.1072	28.6022	24.0305	28.6022	19.1072	20.2794	32.2361	17.8178	24.265	23.6789	23.0928	15.1217	25.5544	32.0016	41.6139	11.9567	28.485	29.6572	37.3939	35.0494	29.6572	22.155	28.2505	18.8728	26.8439	26.9611	16.0594	27.5472	28.9539	28.7194	24.6166	28.8366	23.5616	17.7005	20.045	43.4894	25.9061	37.6283	38.373	38.373	27.6883	23.0898	43.0934
U2O3	1.87141	2.6552	2.3233	2.43393	2.6552	1.3276	0.553166	1.77013	0.3319	1.54886	0.553166	0	0.774432	0.110633	2.54456	1.3276	0	0.3319	1.6595	1.43823	0.553166	0.995699	1.3276	1.3276	1.54886	2.10203	1.21696	2.21266	1.9914	0.774432	0	0	0.221266	1.10633	1.54886	1.6595	0	0.221266	1.21696	0.442533	0.885065	1.54886	1.21696	1.10633	3.14451	3.14451	1.40961	0.755168	1.07881
sum tr.	2991.41	2864.57	2856.96	2876.04	2888.37	3136.17	2929.49	2713.18	2366.11	2646.62	2725.34	2370.4	3122.46	2950.12	2722.93	2650.31	3258.54	2546.28	2368.14	2769.18	2960.74	2106.18	2623.56	2831.98	2923.04	2833.31	2829.36	2351.16	2610.76	2432.18	2518.98	2459.63	2605.22	2521.01	2526.46	2534.45	2416.27	2508.13	2502.32	2350.99	2416.19	2884.35	2505.12	2963.13	2948.88	2948.88	2509.88	2280.43	2864.25
in %	0.299141	0.286457	0.285696	0.287604	0.288837	0.313617	0.292949	0.271318	0.236611	0.264662	0.272534	0.23704	0.312246	0.295012	0.272293	0.265031	0.325854	0.254628	0.236814	0.276918	0.296074	0.210618	0.262356	0.283198	0.292304	0.283331	0.282936	0.235116	0.261076	0.243218	0.251898	0.245963	0.260522	0.252101	0.252646	0.253445	0.241627	0.250813	0.250232	0.235099	0.241619	0.288435	0.250512	0.296313	0.294888	0.294888	0.250988	0.228043	0.286425
La ppm	19.9634	21.7878	21.6467	22.7039	20.47	16.0818	12.0408	14.9857	13.6836	14.4548	11.0319	12.0026	18.8635	10.3751	12.4896	13.0365	11.4054	8.50176	15.6977	21.1054	21.122	9.67589	14.5185	18.5243	23.6396	18.5705	18.3856	11.4009	20.3789	9.48617	14.2419	13.5444	7.19783	16.2283	15.7685	14.4507	13.6357	15.7864	12.694	12.0745	10.6342	25.2234	14.543	20.9324	21.0679	20.9271	16.8227	11.2757	27.4263
Ce ppm	44.3034	47.9871	47.4417	49.6361	45.1783	37.0439	29.5845	36.718	32.3927	34.7037	25.5113	27.6932	44.4995	24.7614	29.8005	30.9572	26.6673	20.9017	35.9259	47.6745	49.8769	21.4871	35.7272	42.2632	54.6205	41.8951	41.7011	27.7665	44.9385	23.0427	34.0383	32.1189	18.5633	37.9011	36.7983	32.7806	32.7201	36.3394	31.2818	27.3465	25.9783	60.2561	34.6615	49.4132	49.3078	48.7706	40.1489	27.8499	61.7917
Pr ppm	6.3732	7.00471	6.913	7.12335	6.54943	5.26885	4.16145	5.23655	4.63764	5.04061	3.7892	4.0184	6.35692	3.54153	4.28053	4.38955	3.87218	3.06424	5.08747	6.76705	7.14399	2.96419	5.13898	5.88613	7.62077	5.84973	5.79189	4.0422	5.99343	3.3682	4.81621	4.5872	2.85679	5.37425	5.24402	4.92142	4.7465	5.25094	4.54707	3.89208	3.74799	8.44824	4.89358	7.06083	6.90801	6.89242	5.66352	4.09093	8.41073
Nd ppm	28.7335	31.5289	31.1376	31.9435	28.9526	23.3665	19.2462	23.9538	20.7377	22.8139	17.4035	18.0981	29.2358	15.9166	19.4978	20.3632	17.4148	14.1239	22.4384	30.1268	32.2307	13.7075	24.0571	26.8982	34.1904	26.6354	26.4014	19.0596	25.7707	15.8058	22.0605	20.9653	13.7121	24.6419	23.6966	21.9849	22.1868	24.1885	21.5251	18.1747	17.8458	38.0793	22.7768	31.913	31.2126	31.2632	25.8932	18.9968	36.9906
Sm ppm	7.40936	8.10634	8.16873	8.35839	7.59408	5.91377	5.2174	6.54931	5.53589	6.30061	4.68805	4.89307	7.6449	4.43615	5.22332	5.28788	4.68861	4.16401	5.95204	7.70897	8.17919	3.72043	6.13822	7.15368	8.63655	6.94698	6.7917	5.27043	6.40164	4.37999	5.78394	5.53028	3.99754	6.20592	6.04323	5.8549	6.1204	6.27698	5.73195	4.71046	4.52375	9.40705	5.88463	7.89352	7.82084	7.78066	6.79834	5.11446	8.79792
Eu ppm	2.3242	2.47156	2.43568	2.45341	2.37519	2.02459	1.76364	2.15483	1.88598	2.02704	1.6301	1.73421	2.53232	1.53486	1.78914	1.87214	1.6411	1.47338	1.94583	2.5015	2.54782	1.4256	2.11682	2.25993	2.68176	2.21771	2.26928	1.82729	1.95717	1.54032	1.927	1.87429	1.42957	2.0434	2.03822	2.03309	2.00584	2.15793	2.02046	1.72014	1.65875	2.96708	2.0052	2.578	2.5204	2.4781	2.25101	1.82641	2.66065
Gd ppm	7.61992	8.54869	8.2942	8.62812	7.95391	6.12893	5.64961	6.85235	5.74284	6.59352	5.1854	5.15451	8.10145	4.67831	5.52612	5.76709	5.13034	4.6118	5.93997	8.15981	8.24363	4.11468	6.7936	7.45518	8.81906	7.47732	7.52681	5.81016	6.16779	4.9559	6.03583	5.80676	4.37956	6.40922	6.20375	6.15948	6.20612	6.73121	6.1787	5.24264	4.98476	9.6444	6.11552	8.14783	8.10584	8.09897	7.08523	5.49977	8.63958
Tb ppm	1.1771	1.40138	1.38203	1.42663	1.29409	0.999204	0.907114	1.14554	0.983276	1.08338	0.859736	0.834244	1.32469	0.778035	0.915177	0.964282	0.849804	0.811041	0.970787	1.32191	1.32497	0.706232	1.13089	1.25738	1.41034	1.2309	1.23603	0.96261	0.985486	0.836157	1.01135	0.928781	0.725501	1.03852	0.968111	1.01877	1.03569	1.08813	1.01321	0.841609	0.813126	1.50893	0.982752	1.31811	1.30653	1.31357	1.15806	0.904013	1.3865
Dy ppm	7.32009	8.50722	8.37076	8.80744	7.9986	5.91747	5.48047	6.93067	5.89404	6.55094	5.18813	4.91038	7.92186	4.68102	5.51976	5.68193	5.12102	4.83253	5.81986	7.94601	7.78179	4.28159	6.7052	7.42878	8.36239	7.53483	7.46829	5.66597	5.80048	5.13728	5.76351	5.57272	4.35168	6.02287	5.85608	6.10941	5.96725	6.65499	6.00374	4.97869	4.91795	8.94492	5.91964	7.78522	7.95383	7.84975	6.93741	5.49604	8.20924
Ho ppm	1.45125	1.70058	1.63414	1.76152	1.60552	1.15078	1.08449	1.33711	1.12109	1.28719	1.02308	0.96538	1.537	0.919681	1.05873	1.1077	0.993553	0.949947	1.16018	1.57258	1.5271	0.875176	1.31009	1.52423	1.67373	1.50904	1.49403	1.14337	1.17497	1.01512	1.13469	1.08605	0.861657	1.21062	1.15691	1.16704	1.19558	1.29066	1.17245	0.956606	0.965064	1.71169	1.16358	1.50793	1.53649	1.51782	1.36031	1.06974	1.61193
Er ppm	3.71681	4.42476	4.31933	4.5942	4.15637	2.9099	2.781	3.42232	2.86467	3.30536	2.64767	2.47253	3.80159	2.34917	2.69238	2.87284	2.53079	2.52462	2.93402	3.96852	4.05021	2.31857	3.36363	3.98694	4.40804	3.87325	3.90306	2.92601	3.0483	2.65124	2.89105	2.78634	2.21877	3.13437	2.99787	3.08231	3.03189	3.27758	3.03844	2.44011	2.49746	4.49097	2.96408	3.96882	4.09941	4.03964	3.52804	2.74216	4.25694
Tm ppm	0.521878	0.619073	0.615348	0.634711	0.587075	0.407552	0.386506	0.474758	0.407544	0.455438	0.365212	0.3376	0.538938	0.336215	0.379568	0.397337	0.351981	0.339325	0.416968	0.557757	0.563413	0.323301	0.458395	0.550987	0.612974	0.555718	0.565229	0.418149	0.426391	0.361864	0.399732	0.376064	0.306581	0.421732	0.417474	0.426708	0.411591	0.460791	0.421439	0.336361	0.333765	0.621205	0.429569	0.550725	0.561793	0.549301	0.476312	0.366044	0.588426
Yb ppm	3.14751	3.73637	3.66387	3.8824	3.58069	2.37374	2.26063	2.8676	2.34238	2.72702	2.11233	2.01143	3.20957	1.95169	2.23066	2.32423	2.06023	2.08233	2.42719	3.24875	3.35596	1.88759	2.73675	3.39839	3.62579	3.36165	3.35863	2.41865	2.55391	2.14582	2.32826	2.23028	1.80037	2.58566	2.47832	2.52415	2.48254	2.73959	2.49229	1.95417	1.98614	3.72188	2.51612	3.31101	3.35405	3.3125	2.82498	2.23529	3.64665
Lu ppm	0.494438	0.563694	0.559006	0.57818	0.540919	0.381666	0.344419	0.425647	0.368217	0.421254	0.331769	0.297879	0.477897	0.310572	0.35614	0.349793	0.311085	0.31284	0.375695	0.506784	0.49546	0.261673	0.39499	0.515136	0.554321	0.519454	0.532175	0.362906	0.406673	0.307448	0.351611	0.325791	0.26125	0.393184	0.380772	0.397422	0.388682	0.419991	0.372083	0.303508	0.32572	0.572719	0.396138	0.507464	0.527287	0.518558	0.436237	0.330126	0.556841
Ba ppm	469.999	579.962	575.239	598.307	597.039	289.273	293.196	218.08	211.276	210.462	162.432	209.654	318.47	174.511	216.383	213.814	178.056	121.506	293.072	396.703	439.105	213.723	222.888	539.199	445.815	548.199	550.896	184.262	569.252	132.715	260.866	249.753	166.852	329.312	323.784	287.43	266.523	312.379	203.648	156.865	258.828	534.03	324.89	451.381	419.367	413.535	290.298	185.676	606.136
Th ppm	2.56214	3.72005	3.58284	3.73566	3.60387	1.80368	1.54204	1.86517	1.65494	1.73588	1.3566	1.12827	1.91437	1.08274	1.5712	1.64023	1.41022	1.04927	2.22117	2.99562	1.90221	0.692539	1.4666	3.06603	2.61347	3.06352	3.05923	1.05535	3.59331	1.18141	1.21358	1.14678	0.429472	1.60112	1.54728	1.43332	1.19343	1.51097	0.976292	1.01641	0.680253	2.53329	1.28642	1.8707	2.4829	2.44196	2.0304	1.14625	3.78098
Nb ppm	10.056	10.9092	10.5996	11.0724	10.6037	10.7304	8.37272	10.7688	9.22619	10.1763	7.88633	7.85311	13.0874	7.22525	8.56658	8.69995	7.62562	6.17752	9.40092	12.4695	11.8481	6.98255	10.2639	9.2385	13.5075	9.24625	9.3906	7.75256	8.49756	6.89907	9.57996	9.11197	4.38074	9.84227	9.57275	8.85353	8.34694	9.79636	8.23762	9.51487	5.9393	14.3314	8.29518	11.7932	12.0681	11.8123	10.8846	8.01822	14.3186
Y ppm	35.8027	42.5516	41.0081	43.4114	39.7924	28.6844	26.3221	33.1696	28.0105	31.7948	25.4339	24.0242	37.8501	22.6721	26.2203	27.5622	24.3664	23.9062	28.6604	38.7211	38.3049	21.0895	32.3842	37.3452	41.4851	37.419	37.3152	27.6816	29.2704	24.9939	27.8425	26.3634	20.8152	29.519	28.7752	29.2228	29.2	31.941	29.0355	23.7218	23.291	43.2131	28.5676	37.7394	38.6341	38.7093	33.722	26.1088	40.6189
Hf ppm	4.9845	5.58266	5.37303	5.66479	5.32638	3.92798	3.64566	4.6068	3.98249	4.41051	3.25115	3.25113	5.25031	2.9608	3.79831	3.83866	3.32351	2.93258	3.9846	5.26446	5.30296	2.28703	4.39982	4.86731	5.6303	4.85099	4.97255	3.64885	4.42035	3.11081	3.97097	3.80624	2.47776	4.02027	3.83957	3.88055	3.7567	4.31181	3.61676	3.09915	2.81676	6.1216	3.71216	5.26529	5.37963	5.33386	4.60401	3.61865	6.02972
Ta ppm	0.677744	0.74604	0.737087	0.762595	0.718629	0.715587	0.562263	0.740618	0.620544	0.689415	0.53903	0.528069	0.862553	0.479045	0.588028	0.594449	0.523901	0.434815	0.648374	0.866188	0.797873	0.459956	0.717464	0.645861	0.902885	0.648524	0.642394	0.543426	0.56527	0.490835	0.653983	0.615229	0.323776	0.67242	0.633914	0.716794	0.580593	0.646251	0.543927	0.608469	0.373547	0.902193	0.537398	0.755282	0.784738	0.795618	0.72213	0.547441	0.925268
U ppm	0.749562	1.42118	1.47099	1.46421	1.32607	0.404429	0.252608	0.430845	0.514189	0.486208	0.397412	0.242483	0.518067	0.254481	0.460327	0.493179	0.269221	0.320773	0.708643	0.92543	0.682939	0.240394	0.474076	1.21868	0.942848	1.23145	1.18996	0.363338	1.20056	0.311088	0.417837	0.381483	0.165761	0.577818	0.532634	0.435594	0.372367	0.496343	0.313533	0.280462	0.232767	0.851362	0.393423	0.649979	0.786387	0.765843	0.453023	0.340886	1.3084
Pb ppm	5.16359	7.42711	7.21085	7.4963	7.17783	3.19868	2.6111	3.16031	2.62806	2.77544	2.16695	2.17103	3.54085	1.73142	2.59036	2.73995	2.26281	1.57987	3.74223	4.94222	3.21294	1.12955	2.6322	6.9459	5.4596	6.90803	6.97269	2.11407	6.31158	1.76381	2.24943	2.23496	1.18983	3.22134	3.12984	2.9183	2.57369	3.15568	2.32283	1.49246	1.99988	5.42625	2.92846	3.10078	4.72319	4.76249	3.5367	2.10884	7.16807
Rb ppm	18.2382	36.894	35.98	39.6056	37.1062	9.36663	5.55681	10.6666	12.8773	15.3974	9.8479	6.42438	14.4081	5.18116	15.151	14.9523	7.79405	8.65583	19.4163	25.5299	18.5884	6.68819	8.7617	34.9687	26.7115	33.7242	33.4984	8.58985	38.683	4.77376	17.5307	13.6223	7.83633	16.3073	16.2864	9.69325	8.64646	13.766	7.18163	4.30455	7.51496	27.9216	12.8803	22.192	28.621	28.0893	14.0633	11.6748	36.8965
Cs ppm	0.255006	1.25222	1.23699	1.30305	1.28086	0.166665	0.118091	0.212337	0.173638	0.348256	0.215746	0.0991306	0.219954	0.0721187	0.238262	0.248957	0.112253	0.172716	0.415508	0.58543	0.170461	0.0574664	0.488864	1.58412	0.94698	1.46961	1.49186	0.0487525	0.921535	0.187856	0.304926	0.205861	2.61755	7.00502	7.56298	0.199668	0.136796	0.274397	0.132949	0.0546588	0.0889231	0.204448	0.222484	1.22369	1.18978	1.20544	0.158649	0.14157	0.822773
Sr ppm	473.769	366.424	362.759	369.88	373.468	427.203	369.145	351.738	379.928	335.8	304.195	510.049	400.171	346.722	347.099	355.09	324.962	261.634	465.351	395.308	467.175	466.41	349.617	395.896	428.69	395.108	398.617	365.329	486.287	265.668	420.605	428.896	369.398	523.433	531.136	467.457	535.26	450.451	464.237	422.01	536.577	502.039	496.185	476.942	451.348	450.237	306.602	364.206	495.464
Sc ppm	31.9047	39.756	39.0527	39.7464	40.409	28.4366	30.8109	35.6977	26.3528	35.7526	29.3668	24.0485	36.7382	30.4609	30.3135	32.2575	30.667	31.0734	23.7234	32.4406	28.3542	29.6812	34.3407	38.0039	33.5461	37.5394	38.5208	29.1756	23.7697	31.6284	25.7407	26.7929	35.3954	25.5302	24.6219	26.9098	27.3214	28.8717	32.0242	30.2262	28.1751	29.0599	26.4515	27.9992	29.744	29.6398	31.9664	28.3441	26.8829
Zr ppm	191.484	210.82	203.122	213.059	202.56	154.04	140.539	176.357	153.688	168.258	124.169	123.493	203.011	111.39	142.844	145.199	125.833	109.833	152.016	202.691	207.232	83.5633	169.898	179.95	216.812	179.56	181.115	139.016	169.878	115.905	151.118	144.465	89.5707	153.923	150.056	149.382	141.647	162.783	135.803	115.96	106.155	239.061	141.329	203.855	207.55	207.917	176.363	135.425	235.651
Notes
(R) = Denotes a duplicate bead made from the same rock powder.
Major elements normalized on a volatile-free basis, with total Fe expressed as FeO.
[truncated: 21 more columns]

## Sheet: WSU XRF LOD & Precision
WSU XRF precision, limit of determination (2-sigma), relative absolute percent difference
	Replicate R2	Replicate LOD	Mean RPAD
Unnormalized (wt.%):
SiO2	0.99929	0.58	0.19
TiO2	0.99992	0.017	0.92
Al2O3	0.99949	0.16	0.5
FeO*	0.99948	0.2	7.17
MnO	0.99983	0.002	0.68
MgO	0.99994	0.076	1.33
CaO	0.99976	0.064	0.69
Na2O	0.99981	0.045	1.34
K2O	0.99992	0.031	0.71
P2O5	0.9999	0.005	2.16
Estimated LOI	0.966	1
SO3	0.989	0.07
Cl	0.992	0.002
Normalized (wt.%):
SiO2	0.99992	0.19
TiO2	0.99996	0.012
Al2O3	0.99987	0.082
FeO*	0.99956	0.18
MnO	0.99988	0.002
MgO	0.99994	0.073
CaO	0.99998	0.043
Na2O	0.99989	0.036
K2O	0.99998	0.015
P2O5	0.99996	0.003
Trace Elements (ppm):
Ni	0.9992	3.5	6.61
Cr	0.9998	3	5.05
Sc	0.997	1.6	5.34
V	0.9996	5	2.6
Ba	0.9997	11.7	1.57
Rb	0.9998	1.7	2.71
Sr	0.99992	4.6	0.73
Zr	0.99994	3.9	0.9
Y	0.9987	1.2	3.01
Nb	0.99987	1.2	5.23
Ga	0.955	2.7	3.82
Cu	0.994	7.4	3.63
Zn	0.9991	3.3	1.98
Pb	0.9966	2.6	8.71
La	0.9941	5.7	8.71
Ce	0.996	7.9	6.48
Th	0.997	1.6	10.34
Nd	0.992	4.3	6.94
U	0.983	2.7

## Sheet: WSI ICP-MS LOD & Precision
Precision on single samples from September 2011 to March 2012
BCR-C Standard (N=54) run as unknown
	La ppm	Ce ppm	Pr ppm	Nd ppm	Sm ppm	Eu ppm	Gd ppm	Tb ppm	Dy ppm	Ho ppm	Er ppm	Tm ppm	Yb ppm	Lu ppm	Ba ppm	Th ppm	Nb ppm	Y ppm	Hf ppm	Ta ppm	U ppm	Pb ppm	Rb ppm	Cs ppm	Sr ppm	Sc ppm	Zr ppm
Average	25.9953	54.0579	7.00195	29.3335	6.99384	2.1296	7.08941	1.16746	7.13134	1.43973	3.82019	0.544437	3.34283	0.524669	684.018	6.13547	11.6132	36.3576	4.96831	0.784584	1.69841	8.9155	45.4602	0.968855	340.603	32.8193	185.514
Std. Dev.	0.170601	0.326226	0.0404355	0.232073	0.0712093	0.0261376	0.0535439	0.0113821	0.0672011	0.0118572	0.0454964	0.00554634	0.0263419	0.00760435	4.42702	0.0615634	0.0816811	0.220906	0.0448376	0.0109803	0.0241219	0.320741	0.480095	0.0185033	2.09683	0.268363	1.04901
Maximum	26.2974	54.4447	7.07614	29.7492	7.14813	2.17156	7.16018	1.18679	7.25283	1.45473	3.89863	0.554365	3.38816	0.536267	690.015	6.27242	11.7175	36.7154	5.0448	0.811791	1.74346	9.80131	46.2534	1.00054	345.146	33.3637	187.331
Minimum	25.5901	53.1822	6.91744	28.7811	6.88031	2.08135	6.98552	1.14164	7.00983	1.42075	3.76557	0.53693	3.29714	0.504158	674.101	6.03074	11.4409	35.8531	4.88712	0.770508	1.66214	8.68677	44.6419	0.94213	337.1	32.2834	183.806
Coeff. Var (Std Dev/avg*100)	0.656277	0.603474	0.57749	0.791155	1.01817	1.22735	0.755266	0.974939	0.942336	0.823573	1.19095	1.01873	0.78801	1.44936	0.647209	1.0034	0.703345	0.607592	0.902471	1.3995	1.42027	3.59756	1.05608	1.90981	0.615624	0.817697	0.565457
TED Standard (N=33) run as unknown
	La ppm	Ce ppm	Pr ppm	Nd ppm	Sm ppm	Eu ppm	Gd ppm	Tb ppm	Dy ppm	Ho ppm	Er ppm	Tm ppm	Yb ppm	Lu ppm	Ba ppm	Th ppm	Nb ppm	Y ppm	Hf ppm	Ta ppm	U ppm	Pb ppm	Rb ppm	Cs ppm	Sr ppm	Sc ppm	Zr ppm
Average	3.90868	10.1051	1.66741	8.59759	2.92195	1.14697	3.9255	0.736533	4.94505	1.08214	3.06811	0.45069	2.84351	0.457797	71.0205	0.437681	2.37809	27.3005	1.84183	0.153342	0.141702	0.821749	3.5191	0.102924	213.515	41.9687	62.8303
Std. Dev.	0.0364251	0.138901	0.0103941	0.0648977	0.047203	0.0114889	0.0366126	0.00797926	0.044137	0.00950966	0.0331178	0.00521882	0.0259074	0.00716394	1.21573	0.00772549	0.0234902	0.230028	0.0181682	0.00290657	0.00339858	0.0179628	0.0881401	0.00591488	3.33899	0.561747	0.489547
Maximum	3.98721	10.2719	1.68803	8.73757	2.98913	1.15985	3.97744	0.754971	5.02236	1.09422	3.12299	0.461183	2.88307	0.473008	73.5584	0.44915	2.42204	27.4901	1.8664	0.159506	0.147871	0.841275	3.72214	0.112631	216.649	43.2491	63.9366
Minimum	3.86396	9.71039	1.65332	8.5204	2.87136	1.12446	3.86713	0.724696	4.87702	1.06678	3.00725	0.441088	2.79077	0.44952	69.6358	0.427439	2.33691	26.7453	1.8144	0.148808	0.136985	0.788832	3.41979	0.0954822	206.23	41.2993	62.2918
Coeff. Var (Std Dev/avg*100)	0.931903	1.37457	0.623365	0.754836	1.61546	1.00167	0.932688	1.08335	0.89255	0.878782	1.07942	1.15796	0.911106	1.56487	1.7118	1.76509	0.987774	0.842578	0.986421	1.89548	2.39839	2.18592	2.50462	5.74685	1.56382	1.33849	0.779158
Limit of Detection (LOD)
Sample ID	La ppm	Ce ppm	Pr ppm	Nd ppm	Sm ppm	Eu ppm	Gd ppm	Tb ppm	Dy ppm	Ho ppm	Er ppm	Tm ppm	Yb ppm	Lu ppm	Ba ppm	Th ppm	Nb ppm	Y ppm	Hf ppm	Ta ppm	U ppm	Pb ppm	Rb ppm	Cs ppm	Sr ppm		Zr ppm
Calculated Det Lim	0.007	0.012	0.009	0.045	0.014	0.01	0.026	0.007	0.024	0.006	0.021	0.006	0.023	0.007	0.258	0.009	0.018	0.015	0.032	0.014	0.014	0.204	0.057	0.014	0.115		0.059
Detection limits are derived from the counts on the blank plus 3 times the standard deviation of the blank calculated as an unknown.
These calculated detection limits, like most published LLDs, are unrealistically low. Precision at these levels is usually +/- 100%.
