# Supplementary material
Source: publisher figshare collection journal article supplement (https://gsapubs.figshare.com/ndownloader/files/22411428)
Supplement: Supplementary file 1 [file 22411428 › Supplement 4_Steens Bootstrapping Data and Results.xlsx]

## Sheet: Lower A
Collected by	Area	Section	Sample	Plagioclase phyric or aphyric	Elevation (m)	Elevation (ft)	Height (m)	Weight	SiO2	TiO2	Al2O3	FeO*	MnO	MgO	CaO	Na2O	K2O	P2O5	Mg#	Ni	Cr	Sc	V	Ba	Rb	Sr	Zr	Y	Nb	Ga	Cu	Zn	La ppm	Ce ppm	Pr ppm	Nd ppm	Sm ppm	Eu ppm	Gd ppm	Tb ppm	Dy ppm	Ho ppm	Er ppm	Tm ppm	Yb ppm	Lu ppm	Ba ppm	Th ppm	Nb ppm
Nicole Moore	Wildhorse Canyon - Near Indian Creek Section	Lower	NMSB-53		1552.16	5092.4		0.5	51.6469	2.56865	15.7954	12.0415	0.210962	4.13035	7.97088	3.52243	1.49876	0.614128	41.8378	43.316	20.776	27.048	305.368	613.578	36.946	488.628	228.452	40.278	14.014	20.58	212.366	116.13	27.4263	61.7917	8.41073	36.9906	8.79792	2.66065	8.63958	1.3865	8.20924	1.61193	4.25694	0.588426	3.64665	0.556841	606.136	3.78098	14.3186
Nicole Moore	Wildhorse Canyon - Wildhorse Ranch Section	Lower	NMSB-55		1445.7	4743.1		0.5	49.0267	1.85198	15.9746	11.5109	0.173946	7.49404	10.0415	2.9577	0.67523	0.293381	57.7223	150.311	220.542	30.338	308.305	242.507	11.426	480.089	119.7	25.7085	7.9785	18.912	189.809	95.6435	11.8679	28.8916	4.18796	19.5918	5.23852	1.83251	5.39825	0.891226	5.40968	1.07142	2.77359	0.384434	2.2826	0.343441	237.6	0.96535	7.41521
Nicole Moore	Wildhorse Canyon - Wildhorse Ranch Section	Lower	NMSB-57		1452.37	4765		0.5	48.5813	1.94769	15.5309	11.9253	0.176225	8.01001	10.1019	2.77487	0.656115	0.295742	58.4821	149.842	241.276	32.732	331.436	242.648	10.976	439.824	119.798	27.44	6.958	19.012	174.146	97.706	11.9639	29.1266	4.20593	19.8368	5.21209	1.83874	5.59639	0.909357	5.45616	1.0717	2.76631	0.381599	2.33341	0.340761	231.707	1.00781	7.44123
Nicole Moore	Wildhorse Canyon - Wildhorse Ranch Section	Lower	NMSB-58		1456.03	4777.01		0.5	50.9286	2.13333	15.474	11.6781	0.170586	6.36	8.42922	3.16803	1.31244	0.345708	53.3172	105.395	158.191	29.353	298.061	710.678	23.837	448.569	204.2	31.0275	10.047	18.321	153.266	106.873	18.1128	41.3734	5.7049	25.6129	6.47882	2.26335	6.57812	1.05906	6.44071	1.26229	3.26421	0.450095	2.78685	0.431035	702.701	2.06471	10.372
Nicole Moore	Wildhorse Canyon - Wildhorse Ranch Section	Lower	NMSB-59		1469.14	4820		0.5	52.092	2.06032	16.293	10.9827	0.220467	4.30026	8.19276	3.43249	1.93718	0.488775	45.0888	61.07	56.933	26.201	293.826	600.062	48.9545	523.134	180.2	30.535	11.7215	19.9955	169.617	102.834	22.832	50.4128	6.78344	29.353	6.80625	2.17034	6.84635	1.05709	6.37169	1.22591	3.23719	0.448136	2.77412	0.428681	592.791	2.87744	12.0827
Nicole Moore	Wildhorse Canyon - Wildhorse Ranch Section	Lower	NMSB-60		1497.13	4911.84		0.5	49.608	3.10273	16.027	13.3003	0.173996	3.28151	8.60242	3.59534	1.74234	0.56647	34.0983	41.591	2.985	34.3275	414.019	484.267	43.4815	436.506	222.2	42.785	14.0295	23.9795	307.654	130.445	23.7366	55.3593	7.80646	35.5928	9.13509	2.92259	9.17462	1.4991	9.00507	1.76183	4.62647	0.63428	3.88081	0.574664	472.603	2.63006	13.9689
Nicole Moore	Wildhorse Canyon - Wildhorse Ranch Section	Lower	NMSB-61		1519	4983.59		0.5	50.2256	2.19235	16.3835	11.4099	0.163536	5.67677	9.04535	3.25759	1.23593	0.409481	51.0615	81.378	94.545	28.314	314.523	436.689	21.78	457.479	163.916	31.977	10.296	20.097	197.802	103.257	18.442	42.6868	5.86963	26.353	6.56821	2.14148	6.69476	1.08145	6.51679	1.25783	3.37801	0.462426	2.85801	0.428237	423.681	2.35998	10.2991
Nicole Moore	Wildhorse Canyon - Wildhorse Ranch Section	Lower	NMSB-62		1529.57	5018.28		0.5	49.8127	2.03356	16.4727	11.4878	0.179157	6.15717	9.19759	3.18808	1.09883	0.372294	52.9191	94.248	106.128	28.413	314.523	403.227	18.414	460.647	150.247	30.195	8.811	19.998	139.887	102.861	16.3603	37.7693	5.31695	23.737	5.99483	2.01632	6.20688	1.00933	6.08725	1.2158	3.12135	0.431514	2.70048	0.407032	392.903	2.00509	9.14357
Nicole Moore	Wildhorse Canyon - Wildhorse Ranch Section	Lower	NMSB-63		1530.4	5021		0.5	49.7525	2.12755	16.4196	11.8498	0.186268	5.77348	9.25147	3.02673	1.2413	0.371227	50.5382	91.377	111.375	29.7	301.653	424.215	13.167	487.08	150.649	30.789	9.108	20.295	232.749	103.455	16.5792	38.5948	5.40665	24.357	6.21269	2.08796	6.47189	1.04239	6.21021	1.24065	3.17793	0.450881	2.70777	0.419399	415.858	2.02558	9.24466
Nicole Moore	Wildhorse Canyon - Wildhorse Ranch Section	Lower	NMSB-64		1556.61	5107		0.5	47.4725	1.54804	17.5967	11.2337	0.17842	8.35449	10.1722	2.50936	0.750827	0.183754	60.9318	165.726	41.679	29.403	285.219	220.671	22.77	446.688	84.7215	20.988	7.029	17.226	148.698	82.863	9.68215	21.6634	3.03053	13.7887	3.84653	1.47726	4.16757	0.706163	4.34207	0.861662	2.28317	0.314947	1.88634	0.301628	208.27	0.747804	7.11085
Nicole Moore	Wildhorse Canyon - Wildhorse Ranch Section	Lower	NMSB-65		1574.27	5164.94		0.5	48.4558	3.05279	15.6784	13.8939	0.263652	4.38187	9.62789	2.81621	1.26309	0.566343	39.8095	53.163	49.005	33.561	415.602	387.882	26.73	494.109	209.442	41.283	13.068	21.582	303.831	124.443	22.7914	54.0597	7.65836	34.2712	8.67452	2.73202	9.04464	1.44595	8.67916	1.67877	4.36404	0.619826	3.72131	0.587314	373.595	2.59383	12.7938
Nicole Moore	Wildhorse Canyon - Wildhorse Ranch Section	Lower	NMSB-66		1585.81	5202.78		0.5	49.0445	2.9838	15.1962	13.5139	0.205632	5.4335	8.37464	3.35929	1.32956	0.55902	45.746	69.597	55.143	31.779	409.959	458.865	25.344	432.432	207.733	38.412	12.474	22.176	136.719	127.215	23.055	54.135	7.58411	34.2765	8.5676	2.71603	8.84494	1.38622	8.35124	1.62191	4.2851	0.588078	3.49518	0.528383	442.737	2.55757	13.0714
Nicole Moore	Wildhorse Canyon - Wildhorse Ranch Section	Lower	NMSB-67		1620.66	5317.11		0.5	50.5848	2.76471	16.2475	12.7394	0.181261	3.31657	8.4711	3.49279	1.55253	0.649391	35.3155	36.828	31.383	29.106	273.636	626.472	24.552	513.018	230.245	40.491	13.959	22.374	264.33	118.404	26.9952	61.4345	8.46944	36.9091	9.11648	2.77475	9.01106	1.43659	8.54366	1.67577	4.37953	0.610695	3.70927	0.564151	611.994	3.51776	13.997
Nicole Moore	Wildhorse Canyon - Wildhorse Ranch Section	Lower	NMSB-68		1665.84	5465.35		0.5	49.5395	2.85695	14.7589	13.7811	0.205585	5.07483	8.44704	3.41187	1.39283	0.531325	43.5747	50.391	38.313	33.066	416.097	493.416	24.057	411.543	210.748	39.699	13.365	22.077	276.309	128.502	23.3754	53.9827	7.60441	33.8016	8.43402	2.63081	8.66011	1.38521	8.47063	1.67052	4.30338	0.597006	3.52724	0.545947	474.302	2.62532	13.4431
Nicole Moore	Wildhorse Canyon - Wildhorse Ranch Section	Lower	NMSB-69		1687.95	5537.89		0.5	49.3626	2.81839	15.005	13.438	0.205761	5.36816	8.37855	3.42555	1.43007	0.567968	45.5857	58.113	48.213	33.66	403.425	501.138	24.354	443.52	203.11	40.689	12.969	21.285	234.234	125.334	23.43	54.9747	7.7378	34.2988	8.56388	2.70369	8.68508	1.37775	8.36572	1.62196	4.32997	0.594902	3.56761	0.544383	491.082	2.54757	12.8534
Nicole Moore	Wildhorse Canyon - Wildhorse Ranch Section	Lower	NMSB-72		1732.89	5685.33		0.5	49.4275	2.88072	14.901	13.6103	0.191794	4.72648	8.74601	3.51695	1.4685	0.530712	42.1388	54.6	36.8	34.2	391.7	511.3	25.3	467.4	208.582	41.3	13.1	21.8	280.2	126.1	23.2005	53.8982	7.6465	34.2093	8.64734	2.69603	8.90153	1.4128	8.48618	1.67275	4.35493	0.608224	3.6953	0.55968	496.06	2.52024	12.4485
Average									49.7226	2.43272	15.8597	12.3998	0.192953	5.48997	8.94066	3.21596	1.2866	0.459108	47.3855	81.6841	82.0804	30.7001	342.334	459.851	25.1306	464.417	180.872	34.5998	11.183	20.6069	213.851	112.004	19.9907	46.2597	6.46399	28.9363	7.26842	2.35403	7.43261	1.19289	7.18409	1.40767	3.68138	0.510342	3.09831	0.472599	448.376	2.30169	11.2502
Std Dev									1.18194	0.495913	0.728271	1.03272	0.0251852	1.52219	0.718196	0.317887	0.35711	0.135862	8.02664	41.6148	70.0862	2.6447	54.6687	141.859	10.4675	30.8897	44.3492	6.7666	2.56051	1.73454	59.006	14.3704	5.44485	12.2638	1.6763	7.18992	1.67262	0.429126	1.61294	0.248326	1.47378	0.283913	0.750576	0.104547	0.626231	0.0953348	141.879	0.839383	2.5304
Median									49.5738	2.3805	15.885	11.9834	0.183765	5.40083	8.67422	3.30844	1.321	0.509743	45.6658	65.3335	52.074	30.019	314.523	471.566	24.2055	459.063	203.655	35.1945	12.0978	20.4375	205.084	111.501	22.8117	52.1555	7.18377	31.5773	7.62013	2.44708	7.74297	1.2296	7.36301	1.43711	3.81748	0.525252	3.17659	0.479709	457.67	2.5339	12.2656
[truncated: 23 more columns]

## Sheet: Lower B
Collected by	Area	Section	Sample	Plagioclase phyric or aphyric	Elevation (m)	Elevation (ft)	Height (m)	Weight	SiO2	TiO2	Al2O3	FeO*	MnO	MgO	CaO	Na2O	K2O	P2O5	Mg#	Ni	Cr	Sc	V	Ba	Rb	Sr	Zr	Y	Nb	Ga	Cu	Zn	La ppm	Ce ppm	Pr ppm	Nd ppm	Sm ppm	Eu ppm	Gd ppm	Tb ppm	Dy ppm	Ho ppm	Er ppm	Tm ppm	Yb ppm	Lu ppm	Ba ppm	Th ppm	Nb ppm
Nicole Moore	Miners Cabin Road	Lower	NMSB-36		1471.41	4827.47		0.8	48.4025	1.7198	15.4331	11.1557	0.164302	8.92065	11.1066	2.39641	0.511993	0.188928	62.6442	171.955	435.366	35.4765	346.725	175.875	8.5425	373.357	95.5755	22.4115	5.3265	19.095	149.544	86.43	7.19783	18.5633	2.85679	13.7121	3.99754	1.42957	4.37956	0.725501	4.35168	0.861657	2.21877	0.306581	1.80037	0.26125	166.852	0.429472	4.38074
Nicole Moore	Miners Cabin Road	Lower	NMSB-37		1485.29	4873		0.6	48.9234	2.2418	18.266	10.9225	0.158573	5.16808	9.56052	3.40599	0.971652	0.381433	49.806	75.978	85.626	24.924	306.525	336.072	18.1905	513.856	160.096	29.2455	11.457	21.6075	216.678	102.309	16.2283	37.9011	5.37425	24.6419	6.20592	2.0434	6.40922	1.03852	6.02287	1.21062	3.13437	0.421732	2.58566	0.393184	329.312	1.60112	9.84227
Nicole Moore	Miners Cabin Road	Lower	NMSB-38		1488.24	4882.66		0.6	49.0801	2.18104	18.3373	10.8757	0.144137	5.06116	9.58061	3.43827	0.935326	0.366269	49.3908	72.4605	93.063	25.2255	303.51	336.373	17.688	526.017	154.87	28.542	10.7535	21.6075	224.416	100.299	15.7685	36.7983	5.24402	23.6966	6.04323	2.03822	6.20375	0.968111	5.85608	1.15691	2.99787	0.417474	2.47832	0.380772	323.784	1.54728	9.57275
Nicole Moore	Willow Creek Fault Block	Lower	NMSB-39		1558.65	5113.69		0.8	49.163	2.14453	17.1628	11.4976	0.175382	5.63541	9.87538	3.32039	0.720954	0.3045	50.6873	109.243	127.635	29.2455	334.665	294.364	10.854	470.139	156.177	30.351	9.5475	21.8085	201.301	103.012	14.4507	32.7806	4.92142	21.9849	5.8549	2.03309	6.15948	1.01877	6.10941	1.16704	3.08231	0.426708	2.52415	0.397422	287.43	1.43332	8.85353
Nicole Moore	Willow Creek Fault Block	Lower	NMSB-40		1566.82	5140.49		0.8	48.8638	2.21419	18.0508	11.2196	0.174041	4.82051	10.1614	3.45212	0.725388	0.318089	47.3968	77.184	85.5255	27.738	356.373	275.772	9.1455	519.183	146.629	29.547	9.9495	21.2055	162.91	103.917	13.6357	32.7201	4.7465	22.1868	6.1204	2.00584	6.20612	1.03569	5.96725	1.19558	3.03189	0.411591	2.48254	0.388682	266.523	1.19343	8.34694
Nicole Moore	Willow Creek Fault Block	Lower	NMSB-41	Plag Phyric	1591.58	5221.71		0.8	49.3782	2.30878	16.2211	12.1148	0.187209	5.60892	9.64489	3.29055	0.915254	0.330182	49.2623	98.1885	127.434	27.8385	351.549	316.675	15.1755	445.617	169.543	32.2605	11.457	22.0095	147.635	113.364	15.7864	36.3394	5.25094	24.1885	6.27698	2.15793	6.73121	1.08813	6.65499	1.29066	3.27758	0.460791	2.73959	0.419991	312.379	1.51097	9.79636
Nicole Moore	Willow Creek Fault Block	Lower	NMSB-42	Plag Phyric	1647.09	5403.85		0.8	48.5838	2.12813	16.6353	11.5133	0.186876	6.47858	10.4895	3.1028	0.603619	0.278023	54.1296	104.52	197.181	31.557	363.207	211.854	7.437	459.988	139.594	29.346	9.246	19.5975	185.523	101.203	12.694	31.2818	4.54707	21.5251	5.73195	2.02046	6.1787	1.01321	6.00374	1.17245	3.03844	0.421439	2.49229	0.372083	203.648	0.976292	8.23762
Nicole Moore	Willow Creek Fault Block	Lower	NMSB-43	Plag Phyric	1793.44	5884		0.8	49.163	1.79479	14.9778	10.7866	0.173354	8.85111	11.0061	2.63493	0.3806	0.231689	63.2464	153.865	359.488	30.4515	279.892	167.534	4.5225	416.874	118.389	24.8235	10.452	17.3865	57.084	96.3795	12.0745	27.3465	3.89208	18.1747	4.71046	1.72014	5.24264	0.841609	4.97869	0.956606	2.44011	0.336361	1.95417	0.303508	156.865	1.01641	9.51487
Nicole Moore	Indian Creek	Lower	NMSB-35		1949.2	6395		0.6	48.9424	2.14749	16.045	11.6979	0.161618	7.57488	9.39097	2.94468	0.792751	0.302317	57.5908	159.795	168.739	25.929	315.067	250.848	13.3665	415.065	148.237	27.537	10.854	20.301	177.784	101.605	13.5444	32.1189	4.5872	20.9653	5.53028	1.87429	5.80676	0.928781	5.57272	1.08605	2.78634	0.376064	2.23028	0.325791	249.753	1.14678	9.11197
Nicole Moore	Indian Creek	Lower	NMSB-34		1951.11	6401.27		0.6	49.0535	2.1764	15.3484	11.8767	0.223317	7.70746	9.48477	2.95421	0.85707	0.318204	57.6441	165.322	175.071	25.125	317.077	267.531	18.1905	408.834	156.378	27.8385	11.3565	19.3965	186.226	109.042	14.2419	34.0383	4.81621	22.0605	5.78394	1.927	6.03583	1.01135	5.76351	1.13469	2.89105	0.399732	2.32826	0.351611	260.866	1.21358	9.57996
Nicole Moore	Wildhorse Canyon - Near Indian Creek Section	Lower	NMSB-51		1971.05	6466.71		0.8	47.9874	2.688	15.3307	13.777	0.201	7.33823	8.7944	2.48229	1.05071	0.350228	52.7637	83.725	166.859	31.323	367.109	297.962	14.184	304.168	172.8	32.505	10.7365	20.488	247.137	113.373	16.8227	40.1489	5.66352	25.8932	6.79834	2.25101	7.08523	1.15806	6.93741	1.36031	3.52804	0.476312	2.82498	0.436237	290.298	2.0304	10.8846
JendaJohnson	Little Alvord Creek and Pike Creek	Lower	MF9463	Plag Phyric	1975.1	6480	0	0.8	49.7762	2.22564	16.5232	10.8445	0.178499	6.52458	9.64738	3.11799	0.857524	0.304516	55.7861	116.933	180.8	27.9	330.8	272.8	11.6	444.7	153.1	27.4	10.1	21.2	189.9	95.5	14.2221	33.8958	4.83981	21.9943	5.73318	1.9735	5.94143	0.965263	5.83582	1.11716	2.81255	0.387827	2.28197	0.353333	261.457	1.26124	9.89014
JendaJohnson	Little Alvord Creek and Pike Creek	Lower	MF9464	Plag Phyric	1994.92	6545	19.812	0.8	49.7084	1.80033	19.6444	9.44588	0.146647	4.43422	10.8372	3.16857	0.563261	0.251071	49.6085	101.028	169.3	23	269.9	238	6.8	523.2	127.1	24.1	9.4	23.6	173.3	80.5	12.5569	28.8656	4.19537	18.9592	4.99461	1.7776	5.17694	0.837297	5.05402	0.987227	2.55041	0.341914	2.03615	0.304495	229.433	1.21443	8.12696
JendaJohnson	Little Alvord Creek and Pike Creek	Lower	MF9465	Aphyric to Sparsly Plag Phyric	1996.44	6550	21.336	0.6	49.5141	2.03824	14.9178	11.3102	0.184662	8.70614	9.25291	2.85005	0.894412	0.331531	61.7486	222.715	536.1	26.2	292.4	293	16.1	411.3	149.6	27.4	11.2	19.5	112.2	101.1	15.8123	36.5955	5.10598	22.7378	5.76439	1.96151	6.12158	0.981298	5.72747	1.12015	2.90307	0.391194	2.35291	0.352361	274.709	1.75968	10.5292
JendaJohnson	Little Alvord Creek and Pike Creek	Lower	MF9466	Aphyric to Sparsly Plag Phyric	1997.05	6552	21.9456	0.6	49.1701	1.81655	14.7265	11.2186	0.180487	9.47434	10.0943	2.50447	0.586472	0.228189	63.9128	249.001	663.1	28.9	296.3	229.7	9.2	337.1	130.8	24.4	10.1	17.7	132.3	92.1	11.8905	27.5942	4.02049	18.3148	4.90222	1.67544	5.22264	0.859426	5.12605	1.01484	2.56244	0.35601	2.11163	0.313739	214.56	1.43564	7.86655
Nicole Moore	JJ Transect Repeats	Lower	NMSB-5		1999.65	6560.54	24.5489	0.6	48.7942	2.11589	15.1299	11.7722	0.187001	8.55436	9.479	2.88556	0.746604	0.335254	60.3785	232.959	554.157	28.6425	295.47	302.907	10.1505	421.396	159.694	29.145	12.1605	19.7985	140.197	106.832	16.0818	37.0439	5.26885	23.3665	5.91377	2.02459	6.12893	0.999204	5.91747	1.15078	2.9099	0.407552	2.37374	0.381666	289.273	1.80368	10.7304
Nicole Moore	Wildhorse Canyon - Near Indian Creek Section	Lower	NMSB-52		2000.85	6564.48		0.6	48.7668	2.11189	16.5651	11.6517	0.1539	7.38789	9.69943	2.74353	0.67798	0.241747	57.076	144.648	156.408	28.028	325.066	193.648	12.838	361.62	134.026	25.186	8.036	20.776	190.904	93.982	11.2757	27.8499	4.09093	18.9968	5.11446	1.82641	5.49977	0.904013	5.49604	1.06974	2.74216	0.366044	2.23529	0.330126	185.676	1.14625	8.01822
Nicole Moore	JJ Transect Repeats	Lower	NMSB-6		2007.58	6586.56	32.4798	0.8	49.3604	1.95038	15.1528	11.18	0.186845	8.34004	10.5	2.61635	0.469365	0.243764	61.0046	195.171	506.118	31.557	307.63	302.706	6.7335	364.513	144.82	27.135	9.7485	18.5925	164.82	95.877	12.0408	29.5845	4.16145	19.2462	5.2174	1.76364	5.64961	0.907114	5.48047	1.08449	2.781	0.386506	2.26063	0.344419	293.196	1.54204	8.37272
Nicole Moore	JJ Transect Repeats	Lower	NMSB-7		2027.53	6652	52.4268	0.8	49.7377	2.50583	14.6044	12.1472	0.198128	6.59098	10.5529	2.74296	0.638667	0.281297	53.2247	99.897	318.886	34.773	380.091	229.14	11.256	352.353	185.422	34.6725	12.1605	19.5975	197.583	107.032	14.9857	36.718	5.23655	23.9538	6.54931	2.15483	6.85235	1.14554	6.93067	1.33711	3.42232	0.474758	2.8676	0.425647	218.08	1.86517	10.7688
Nicole Moore	JJ Transect Repeats	Lower	NMSB-8		2028.14	6654	53.0352	0.8	50.391	1.92319	17.0804	9.95258	0.159281	6.09504	10.4041	2.99085	0.739112	0.264421	56.2228	124.519	245.22	26.934	281.4	218.386	14.1705	382.302	158.991	29.0445	9.849	20.904	154.971	87.7365	13.6836	32.3927	4.63764	20.7377	5.53589	1.88598	5.74284	0.983276	5.89404	1.12109	2.86467	0.407544	2.34238	0.368217	211.276	1.65494	9.22619
Nicole Moore	Indian Creek	Lower	NMSB-33		2029.69	6659.1		0.8	49.6782	1.80288	14.7826	10.9466	0.166797	9.06005	10.5134	2.51607	0.343467	0.189874	63.4463	223.411	441.295	31.4565	302.907	140.298	4.422	261.4	120.6	26.4315	8.241	18.1905	100.399	89.244	9.48617	23.0427	3.3682	15.8058	4.37999	1.54032	4.9559	0.836157	5.13728	1.01512	2.65124	0.361864	2.14582	0.307448	132.715	1.18141	6.89907
JendaJohnson	Little Alvord Creek and Pike Creek	Lower	MF9467	Plag Phyric	2033.02	6670	57.912	0.8	50.4237	2.40762	14.7229	11.5794	0.189595	6.33349	10.3282	2.90549	0.81955	0.290048	53.4244	97.2296	309	35.2	361	234.2	12.4	339.4	171.4	32.1	11.6	21.2	194.5	97.7	14.8862	35.5668	5.17131	23.4176	6.29553	2.10306	6.75468	1.11252	6.67082	1.3197	3.31103	0.464274	2.75446	0.414674	230.449	1.82707	10.3947
Nicole Moore	JJ Transect Repeats	Lower	NMSB-9		2041.95	6699.31	66.8466	0.8	50.2321	2.41014	14.364	11.6484	0.189002	6.78355	10.4874	2.76566	0.856581	0.263249	54.9808	104.118	288.234	34.572	386.422	223.612	16.5825	334.966	172.759	31.959	11.055	19.899	207.733	104.922	14.4548	34.7037	5.04061	22.8139	6.30061	2.02704	6.59352	1.08338	6.55094	1.28719	3.30536	0.455438	2.72702	0.421254	210.462	1.73588	10.1763
Nicole Moore	JJ Transect Repeats	Lower	NMSB-13		2065.02	6775	89.916	0.8	48.9867	1.85085	18.5479	9.94185	0.155054	6.05746	10.6741	3.02686	0.508382	0.250844	56.0971	126.228	191.05	24.4215	293.761	220.095	6.9345	509.635	130.549	24.6225	9.849	20.6025	134.971	87.7365	12.0026	27.6932	4.0184	18.0981	4.89307	1.73421	5.15451	0.834244	4.91038	0.96538	2.47253	0.3376	2.01143	0.297879	209.654	1.12827	7.85311
JendaJohnson	Little Alvord Creek and Pike Creek	Lower	MF9470	Sparsely Plag	2069.59	6790	94.488	0.8	49.6073	1.97399	17.926	10.1731	0.158085	5.88326	10.379	2.99676	0.620859	0.281634	54.8084	112.356	157.6	27	305.4	236.5	11.6	498.9	131.1	24	7.1	20.3	146.5	86.8	13.0042	30.7938	4.40785	20.21	5.35589	1.8326	5.54095	0.90255	5.39307	1.02271	2.68202	0.365633	2.19556	0.32943	226.917	1.23273	8.80077
JendaJohnson	Little Alvord Creek and Pike Creek	Lower	MF9468	Aphyric	2072.64	6800	97.536	0.8	50.5955	1.95934	16.1241	10.2815	0.167359	6.74989	10.3495	2.85055	0.689798	0.232407	57.9262	138.11	294.1	29.6	311.5	212	14.3	316	136.9	27.9	8.4	19.8	169.1	90.8	12.411	29.2049	4.22588	19.2437	5.20311	1.79185	5.71053	0.962242	5.80107	1.13691	2.88888	0.411081	2.3694	0.367293	204.954	1.65415	8.61126
Nicole Moore	Indian Creek	Lower	NMSB-24		2074.39	6805.76		0.8	48.7631	2.56671	15.0734	12.4338	0.197637	6.69202	10.0871	3.16168	0.713131	0.311443	53.0229	106.832	255.471	33.366	378.584	230.648	9.246	337.178	172.96	32.763	11.3565	20.301	227.733	110.248	14.5185	35.7272	5.13898	24.0571	6.13822	2.11682	6.7936	1.13089	6.7052	1.31009	3.36363	0.458395	2.73675	0.39499	222.888	1.4666	10.2639
Nicole Moore	JJ Transect Repeats	Lower	NMSB-11		2075.38	6809	100.279	0.6	49.354	1.82117	14.5733	10.791	0.172049	9.77695	10.2106	2.5315	0.561566	0.207896	65.5179	278.083	518.077	29.8485	300.394	174.568	10.7535	307.832	130.75	26.4315	9.849	18.1905	102.309	90.45	11.0319	25.5113	3.7892	17.4035	4.68805	1.6301	5.1854	0.859736	5.18813	1.02308	2.64767	0.365212	2.11233	0.331769	162.432	1.3566	7.88633
JendaJohnson	Little Alvord Creek and Pike Creek	Lower	MF9469	Mostly aphyric	2075.69	6810	100.584	0.6	49.3871	1.81421	14.7357	10.4637	0.172081	9.81579	10.2904	2.56785	0.545951	0.207186	66.299	264.354	487.9	31.1	298.7	166.6	9.4	304.6	122.6	25.3	8.5	18.2	113.4	92.3	10.7309	25.3951	3.6938	17.1462	4.71637	1.60706	5.09245	0.850898	5.17279	1.0282	2.65162	0.363017	2.1533	0.323546	160.714	1.30169	7.86915
JendaJohnson	Little Alvord Creek and Pike Creek	Lower	MF9471a	Plag Phyric	2084.83	6840	109.728	0.4	48.8402	2.22749	15.5505	11.9844	0.186342	7.15964	10.1505	2.89168	0.718818	0.290308	55.6117	133.151	242.3	31.2	378.4	270.2	10.7	414.8	146.6	28.4	10.7	22.8	147.9	102.2	13.809	32.2751	4.6997	21.5459	5.73422	1.95166	6.07156	0.977689	5.85312	1.15704	2.96244	0.397676	2.41131	0.368409	254.274	1.29477	9.34681
JendaJohnson	Little Alvord Creek and Pike Creek	Lower	MF9471b	Aphyric	2084.83	6840	109.728	0.4	49.4304	2.22172	16.4675	11.1207	0.177324	6.34805	10.0129	3.07919	0.829555	0.312562	54.4855	114.407	191.2	27	331.5	267.7	11.7	439.5	154.2	28	9.2	22.7	136.8	96.5	15.0691	35.1099	5.04326	22.8858	5.97091	2.04992	6.36951	1.02215	6.17031	1.21176	3.1204	0.42115	2.50563	0.37815	263.181	1.40767	10.2672
Nicole Moore	JJ Transect Repeats	Lower	NMSB-14		2085.93	6843.6	110.826	0.4	49.2576	2.86275	14.1155	13.2007	0.209278	6.11651	9.93965	2.94275	0.956807	0.398532	49.2823	91.9575	361.096	35.577	425.115	326.424	15.5775	395.97	207.532	37.989	13.869	21.4065	242.707	122.007	18.8635	44.4995	6.35692	29.2358	7.6449	2.53232	8.10145	1.32469	7.92186	1.537	3.80159	0.538938	3.20957	0.477897	318.47	1.91437	13.0874
Nicole Moore	JJ Transect Repeats	Lower	NMSB-15		2094.1	6870.41	118.998	0.8	49.0016	1.67715	14.1864	11.4995	0.183449	10.4711	9.95668	2.37486	0.440463	0.208714	65.6307	254.365	635.863	30.8535	282.907	179.493	5.628	343.911	116.982	23.517	8.7435	16.08	177.382	91.1535	10.3751	24.7614	3.54153	15.9166	4.43615	1.53486	4.67831	0.778035	4.68102	0.919681	2.34917	0.336215	1.95169	0.310572	174.511	1.08274	7.22525
Nicole Moore	JJ Transect Repeats	Lower	NMSB-16		2096.41	6878	121	0.8	50.0521	1.9678	14.7229	11.0524	0.177821	8.15032	10.2029	2.64372	0.790016	0.240063	60.73	174.87	460.993	30.753	316.675	222.406	15.7785	341.901	146.127	27.0345	9.7485	19.3965	129.544	95.877	12.4896	29.8005	4.28053	19.4978	5.22332	1.78914	5.52612	0.915177	5.51976	1.05873	2.69238	0.379568	2.23066	0.35614	216.383	1.5712	8.56658
Nicole Moore	JJ Transect Repeats	Lower	NMSB-17		2096.75	6879.09	121.641	0.8	50.0831	2.01546	15.1357	11.0399	0.180182	7.14195	10.698	2.65128	0.80308	0.251385	57.5674	141.202	384.412	32.0595	307.932	218.185	16.884	353.458	149.845	28.4415	9.7485	19.9995	194.266	94.3695	13.0365	30.9572	4.38955	20.3632	5.28788	1.87214	5.76709	0.964282	5.68193	1.1077	2.87284	0.397337	2.32423	0.349793	213.814	1.64023	8.69995
Nicole Moore	JJ Transect Repeats	Lower	NMSB-18		2097.63	6882	122.53	0.6	48.4653	1.80009	13.7891	11.6697	0.188303	10.9038	10.1522	2.33771	0.471432	0.222461	66.2103	301.6	812.14	30.2505	297.982	184.819	8.1405	319.69	129.846	24.723	8.7435	15.879	140.097	95.9775	11.4054	26.6673	3.87218	17.4148	4.68861	1.6411	5.13034	0.849804	5.12102	0.993553	2.53079	0.351981	2.06023	0.311085	178.056	1.41022	7.62562
JendaJohnson	Little Alvord Creek and Pike Creek	Lower	MF9472	Aphyric	2100.07	6890	125	0.6	49.0222	1.67628	14.1687	11.3468	0.183748	10.4451	9.99341	2.46352	0.483085	0.217145	65.8757	247.788	640	31.3	293.8	190.5	7.5	344.1	111.3	22.7	8.4	19	99.9	89.3	10.6957	25.465	3.62062	16.8339	4.46787	1.59339	4.82639	0.795769	4.79995	0.951637	2.415	0.336933	2.00216	0.307685	180.833	1.06077	7.40582
Nicole Moore	JJ Transect Repeats	Lower	NMSB-19		2121.5	6960.3	146.395	0.8	49.1546	1.65574	14.7942	11.0126	0.179178	9.50852	10.6027	2.40086	0.519042	0.172575	64.4217	247.531	533.655	30.351	296.173	127.333	9.7485	260.295	115.273	24.2205	6.633	17.286	98.9925	88.038	8.50176	20.9017	3.06424	14.1239	4.16401	1.47338	4.6118	0.811041	4.83253	0.949947	2.52462	0.339325	2.08233	0.31284	121.506	1.04927	6.17752
Nicole Moore	Indian Creek	Lower	NMSB-31		2129.67	6987.11		0.8	48.5153	2.086	16.5622	11.5307	0.18132	7.0177	10.1385	3.0648	0.650609	0.252963	56.0697	129.645	199.392	28.0395	330.142	192.055	9.246	358.383	144.519	28.2405	9.246	20.2005	198.487	97.887	11.4009	27.7665	4.0422	19.0596	5.27043	1.82729	5.81016	0.96261	5.66597	1.14337	2.92601	0.418149	2.41865	0.362906	184.262	1.05535	7.75256
JendaJohnson	Little Alvord Creek and Pike Creek	Lower	JS17	Aphyric	2194.56	7200	219.456	0.8	49.4606	1.81438	14.6893	10.6931	0.174718	9.67577	10.1674	2.52557	0.588307	0.210928	65.4888	266.783	515.5	29.2	298.3	168.9	11.3	302.1	122.6	24.8	9.4	17.4	173.2	88.2	10.6597	25.69	3.65429	16.9842	4.55928	1.60516	5.10103	0.841537	5.07583	1.009	2.60245	0.355663	2.10127	0.316952	160.754	1.32576	7.958
JendaJohnson	Little Alvord Creek and Pike Creek	Lower	JS18	Aphyric	2205.23	7235	235	0.8	49.713	1.86016	15.2629	10.4095	0.171493	8.65566	10.4278	2.60611	0.684346	0.209138	63.5541	204.608	410.7	30.3	305.1	167	12.8	301.3	126.9	24.9	11.2	17.8	128.8	86.1	10.7413	25.8078	3.72547	17.1454	4.7079	1.626	5.21861	0.857171	5.22789	1.04441	2.66829	0.364606	2.16228	0.33178	159.418	1.31654	7.91685
JendaJohnson	Little Alvord Creek and Pike Creek	Lower	JS19	Plag phyric	2212.85	7260	237.744	0.2	50.3191	2.8037	15.1682	12.3612	0.195321	5.12196	9.19612	3.26139	1.18694	0.386067	46.4943	63.6054	76.8	29.6	393.7	336.7	20.3	388.7	191.2	33.3	11.4	23.1	225	114.2	18.6934	44.554	6.3168	28.558	7.51302	2.47964	7.85716	1.28155	7.64261	1.46888	3.83042	0.529273	3.071	0.478414	324.727	2.30516	12.4395
Nicole Moore	JJ Transect Repeats	Lower	NMSB-20A		2215.95	7270.17	240.844	0.2	50.4641	2.08052	17.7804	10.4021	0.165377	4.84615	9.70554	3.18654	1.07659	0.292633	49.4186	75.2745	101.706	24.12	304.816	306.223	22.6125	469.034	159.493	30.0495	10.3515	20.8035	160.599	97.083	15.6977	35.9259	5.08747	22.4384	5.95204	1.94583	5.93997	0.970787	5.81986	1.16018	2.93402	0.416968	2.42719	0.375695	293.072	2.22117	9.40092
Nicole Moore	JJ Transect Repeats	Lower	NMSB-21		2218.64	7279	243.535	0.2	50.3842	2.77951	14.3672	12.9316	0.201276	5.38388	9.14925	2.99712	1.41139	0.394574	46.6127	63.0135	118.288	33.2655	405.417	414.663	28.6425	393.457	211.351	39.195	14.3715	20.502	204.316	119.293	21.1054	47.6745	6.76705	30.1268	7.70897	2.5015	8.15981	1.32191	7.94601	1.57258	3.96852	0.557757	3.24875	0.506784	396.703	2.99562	12.4695
JendaJohnson	Little Alvord Creek and Pike Creek	Lower	JS20	Plag phyric	2218.94	7280	243.84	0.2	50.7276	2.74085	14.8727	12.5022	0.19601	5.18117	8.94864	3.06963	1.36808	0.393173	46.498	59.5902	105.8	31.7	387.4	382.6	25.3	387.6	199.2	35.8	11.1	23.9	187.1	113	20.3424	47.0437	6.56112	29.3871	7.52074	2.43825	7.94695	1.29014	7.69226	1.51431	3.89494	0.544706	3.15295	0.485769	379.726	3.06691	12.4278
JendaJohnson	Little Alvord Creek and Pike Creek	Lower	JS21	Aphyric	2240.28	7350	265.176	0.8	49.9066	2.75471	14.7326	12.7045	0.202283	5.68383	9.33311	3.18373	1.104	0.394705	48.4065	73.8544	137.8	33.3	387.3	320.6	20.7	372.8	196.5	34.2	12.6	23.5	172.1	112.2	18.585	44.2965	6.27098	28.6356	7.50422	2.46311	7.96911	1.30552	7.68694	1.52456	3.94743	0.536868	3.15317	0.486108	309.133	2.27802	12.1595
JendaJohnson	Little Alvord Creek and Pike Creek	Lower	JS22	Aphyric	2249.42	7380	274.32	0.8	48.4708	1.83706	15.9727	11.107	0.173214	8.69175	10.5113	2.56407	0.478982	0.193169	62.1369	208.011	362.4	29.9	321	128.5	5.7	343.7	109.2	22.5	4.6	18.7	91.4	90.7	9.07962	22.4411	3.34006	15.9871	4.53013	1.60598	4.96028	0.823478	4.96359	0.983645	2.48049	0.336952	1.99507	0.308049	119.991	0.838386	6.50829
JendaJohnson	Little Alvord Creek and Pike Creek	Lower	JS23	Aphyric	2261.62	7420	286.512	0.8	49.0804	2.00553	16.14	11.4448	0.170389	7.63057	9.79982	2.91592	0.575447	0.237099	58.3022	160.549	181.2	28.4	310.2	181.9	9.2	378.2	120.2	22.5	8.3	21	189.8	95.4	10.5615	25.9665	3.76875	17.7616	4.91101	1.73675	5.17849	0.86468	5.15016	1.00918	2.6172	0.355308	2.0809	0.319161	175.121	1.03487	7.61004
JendaJohnson	Little Alvord Creek and Pike Creek	Lower	JS24	Aphyric	2276.86	7470	301.752	0.8	49.0265	2.65229	15.0134	12.8289	0.199434	6.07157	10.0328	3.16585	0.690501	0.318649	49.812	80.577	186.3	33.8	399.3	239.9	8.1	355.5	170.1	32.1	9.2	21.6	199.4	111.6	14.6211	36.1861	5.28621	24.6816	6.61839	2.29261	7.12312	1.18024	7.05235	1.40746	3.58958	0.493535	2.89463	0.437661	227.407	1.45221	10.4696
JendaJohnson	Little Alvord Creek and Pike Creek	Lower	JS25	Phyric	2286	7500	310.896	0.8	48.1352	2.1013	15.9576	11.7766	0.181769	7.9303	10.2456	2.8984	0.527539	0.245781	58.544	168.157	315.3	31.3	353.1	182.5	6.9	371	124.4	26.5	9.1	21.2	153.7	96.1	10.8909	26.7256	3.91284	18.4602	5.07137	1.78241	5.45054	0.91594	5.54788	1.09734	2.84359	0.386909	2.26903	0.351383	173.772	0.940632	7.49117
JendaJohnson	Little Alvord Creek and Pike Creek	Lower	JS26	Phyric	2301.24	7550	326.136	0.8	48.3947	2.00198	16.0444	11.4997	0.18097	8.07676	10.1269	2.91143	0.512569	0.250602	59.5616	172.5	289.7	29.9	335.2	178.2	6	395.8	116.9	25.3	5.8	19.5	150.6	95	10.3647	25.708	3.81401	17.9648	4.87632	1.78851	5.44684	0.888972	5.35363	1.04946	2.71997	0.377343	2.20453	0.331351	169.509	0.842105	7.03362
JendaJohnson	Little Alvord Creek and Pike Creek	Lower	JS27	Phyric	2304.29	7560	329.184	0.8	48.6432	1.64372	16.6636	10.6612	0.1682	8.29102	10.4326	2.68936	0.596197	0.210813	61.99	184.037	358.2	27.8	288	159.9	7.2	402.4	95.9	22.3	6.1	20.6	112.6	84.9	9.15405	22.3276	3.31947	15.6104	4.27409	1.55752	4.6337	0.769692	4.67431	0.914819	2.30935	0.325043	1.92852	0.294786	154.33	0.783585	5.92277
JendaJohnson	Little Alvord Creek and Pike Creek	Lower	JS28	Aphyric	2316.48	7600	341.376	0.4	48.4582	1.90314	15.8698	12.605	0.175852	7.98787	9.0081	3.06915	0.63658	0.28628	57.0624	133.485	192	26.4	328.4	237.8	8.7	451.3	116.8	24.6	6.8	20.7	221.1	102.7	11.385	27.5835	4.02418	18.8068	4.92903	1.77019	5.23784	0.849556	5.00593	0.98992	2.54371	0.359496	2.0743	0.324413	225.136	0.951284	6.92422
JendaJohnson	Little Alvord Creek and Pike Creek	Lower	JS29	Phyric	2316.48	7600	341.376	0.4	48.9246	2.07581	17.2744	11.3762	0.171418	6.11011	9.89272	3.21506	0.665848	0.293828	52.9711	92.8284	90.9	27.6	338.9	249.7	9.6	498.6	126.9	25.7	7.4	22.2	153.6	97	12.467	30.228	4.40485	20.6659	5.50721	1.91521	5.74148	0.938561	5.53804	1.09183	2.83635	0.3915	2.30768	0.35862	238.36	1.01708	7.59458
JendaJohnson	Little Alvord Creek and Pike Creek	Lower	JS30	Aphyric	2316.48	7600	341.376	0.4	48.3505	2.26033	15.2563	13.0642	0.198999	7.42842	9.31842	3.11863	0.698599	0.305651	54.3887	112.876	146.7	32.4	402.6	252.8	9	438.3	131.2	27.4	6.6	20.8	225.2	108.8	12.6315	30.6419	4.48705	21.0823	5.60448	1.9428	6.0396	0.982037	5.78149	1.14152	2.96009	0.405589	2.36141	0.36489	244.115	1.02865	7.69235
Average									49.274	2.11537	15.7738	11.4372	0.179392	7.31735	10.0187	2.88352	0.722961	0.277746	56.6577	148.475	297.185	29.7037	330.523	238.849	11.9044	390.605	145.319	27.9783	9.62175	20.1983	165.885	98.6797	13.5358	31.5495	4.54477	20.8492	5.55321	1.90262	5.91733	0.972106	5.81121	1.14024	2.92529	0.403844	2.38433	0.363638	229.875	1.4282	8.88325
Std Dev									0.676224	0.325241	1.31051	0.880259	0.015763	1.6433	0.531046	0.298645	0.228285	0.060343	5.91469	64.998	178.976	3.0485	38.8431	64.3936	5.20804	68.1223	27.0877	3.98719	2.01647	1.80894	42.4067	9.51776	2.98192	6.5746	0.895615	3.90367	0.930659	0.270836	0.928256	0.148094	0.873425	0.17065	0.431656	0.0606521	0.355576	0.0556144	63.5042	0.497019	1.78091
Median									49.163	2.08052	15.3307	11.3762	0.179178	7.15964	10.1269	2.91143	0.689798	0.278023	56.2228	133.151	245.22	29.9	317.077	230.648	10.7535	382.302	144.82	27.4	9.7485	20.301	169.1	96.5	12.694	30.7938	4.40785	20.6659	5.50721	1.87429	5.76709	0.96261	5.68193	1.11716	2.86467	0.3915	2.32423	0.353333	222.888	1.32576	8.61126
[truncated: 23 more columns]

## Sheet: Upper
Collected by	Area	Section	Sample	Plagioclase phyric or aphyric	Elevation (m)	Elevation (ft)	Height (m)	Weight	SiO2	TiO2	Al2O3	FeO*	MnO	MgO	CaO	Na2O	K2O	P2O5	Mg#	Ni	Cr	Sc	V	Ba	Rb	Sr	Zr	Y	Nb	Ga	Cu	Zn	La ppm	Ce ppm	Pr ppm	Nd ppm	Sm ppm	Eu ppm	Gd ppm	Tb ppm	Dy ppm	Ho ppm	Er ppm	Tm ppm	Yb ppm	Lu ppm	Ba ppm	Th ppm	Nb ppm
JendaJohnson	Wildhorse Canyon	Upper	JS31	Sparsely Plag phyric decreasing to aphyric	2310.38	7580	457.2	0.666667	48.5023	1.95089	16.6927	11.5941	0.18799	7.52342	9.75499	2.77328	0.724786	0.29552	57.6418	120.819	141.4	31.7	316.2	294.4	12.2	566.9	115.2	25.3	7.2	20.4	189.8	96.1	12.1381	29.3144	4.24699	19.7402	5.216	1.82707	5.55353	0.915593	5.41499	1.07875	2.7837	0.39251	2.30224	0.353968	287.874	1.00743	7.17581
JendaJohnson	Wildhorse Canyon	Upper	JS32	Aphyric	2321.05	7615	467.868	0.666667	52.9831	1.78433	16.4173	10.0988	0.159422	4.6259	7.87592	3.57619	1.98654	0.492491	48.9956	66.5854	88.3	23	247.2	605.2	46.6	522.5	181.7	28.5	12.6	20.5	101.8	94.8	23.372	50.4334	6.6925	28.4923	6.59036	2.05275	6.26461	1.00197	5.96006	1.17564	3.049	0.425205	2.60449	0.414266	601.756	3.096	12.4055
JendaJohnson	Wildhorse Canyon	Upper	JS33	Aphyric	2328.67	7640	475.488	0.666667	51.6824	2.08855	16.0501	11.2301	0.189604	4.77735	8.10859	3.58652	1.79305	0.493687	47.1494	56.8889	66.1	24.8	291.7	610.6	35.3	521.7	183.5	30.4	12.3	20.7	153.1	101.8	23.3937	51.5097	6.92538	29.8236	7.13333	2.24514	6.93903	1.0976	6.50618	1.27915	3.30791	0.469638	2.77639	0.43011	617.421	2.88613	12.5994
JendaJohnson	Wildhorse Canyon	Upper	JS34	Aphyric	2346.96	7700	493.776	0.666667	50.1089	1.99105	16.4006	11.4125	0.186659	6.02798	8.82041	3.41039	1.24058	0.40083	52.5544	82.0473	74.9	27.9	290.1	476.3	19.9	477.6	155.3	30.5	8.4	21.3	134.3	98.4	18.3589	40.7669	5.76242	25.6815	6.40775	2.15337	6.52372	1.06312	6.45372	1.27473	3.33496	0.465562	2.81717	0.437202	473.634	2.34302	9.48306
JendaJohnson	Wildhorse Canyon	Upper	JS36	Plag Phyric	2362.2	7750	509.016	0.666667	49.8069	2.11213	16.335	11.5014	0.186543	5.99991	9.25441	3.3023	1.12236	0.379063	52.2444	86.4648	111.9	30.5	324.7	416.7	18.4	475	154	31.4	9	19.5	143.4	100.6	17.1247	38.3598	5.44961	24.6032	6.21493	2.07692	6.50209	1.05868	6.25889	1.24942	3.25474	0.455824	2.71536	0.430605	409.882	2.0036	9.05816
JendaJohnson	Wildhorse Canyon	Upper	JS37	Plag Phyric	2368.3	7770	515.112	0.666667	50.6354	2.63709	15.2809	12.1857	0.196188	5.33692	8.18263	3.50197	1.51928	0.52402	47.8752	77.8646	91.8	29.8	340.3	503.3	30.4	419.1	219.9	41.4	12.2	22.5	221.1	118.2	24.579	54.3516	7.68598	34.2761	8.5713	2.53623	8.61581	1.40514	8.47788	1.66547	4.32436	0.608734	3.68751	0.57711	497.236	3.24005	13.236
JendaJohnson	Wildhorse Canyon	Upper	JS38	Plag Phyric	2383.54	7820	530.352	0.666667	49.5438	2.53066	15.5918	12.4611	0.196986	5.46321	9.06136	3.40165	1.28811	0.461191	47.9009	63.33	96.5	31.2	344.9	437.6	21.6	454.7	192.7	35.8	10.7	21	251	113.2	20.9421	48.2808	6.82976	30.5222	7.723	2.39819	7.96432	1.29084	7.54934	1.51866	3.89657	0.549627	3.25007	0.511832	431.819	2.60397	11.8124
JendaJohnson	Wildhorse Canyon	Upper	JS39	Plag Phyric	2392.68	7850	539.496	0.666667	48.8111	3.26834	14.2264	14.4841	0.219642	5.04785	8.29369	3.58181	1.47248	0.59452	42.2254	53.1437	54.4	33.9	449.6	514.6	28.1	425.4	237.7	43	14.6	23.3	196.1	138	25.6738	59.542	8.46401	37.9941	9.61358	2.92932	9.8218	1.57997	9.3604	1.85831	4.79421	0.667176	4.05229	0.624649	505.665	2.94182	14.6325
JendaJohnson	Wildhorse Canyon	Upper	JS40	Plag Phyric	2432.3	7980	579.12	0.666667	48.5717	3.00495	15.0681	13.4103	0.213034	5.63414	8.75663	3.51851	1.25997	0.562623	46.8388	73.783	84.9	31.8	427.3	481.8	16.1	459.4	211.7	38.7	13	24.1	233.1	124	22.9614	54.0929	7.72708	34.6239	8.7155	2.69194	8.90902	1.43974	8.4331	1.66751	4.35746	0.604864	3.56984	0.562003	471.334	2.35	13.1284
JendaJohnson	Wildhorse Canyon	Upper	JS41	Plag Phyric	2468.88	8100	621.792	0.666667	51.1939	2.63625	15.5975	11.8812	0.195182	4.44949	8.03288	3.24227	2.17349	0.597905	43.9893	39.3609	39.4	27.6	338.8	579.5	40.3	466.9	224.5	37.1	13	22.9	244.7	117.9	26.3763	59.7657	8.27981	36.3878	8.89406	2.69415	8.80171	1.39956	8.32696	1.65054	4.25857	0.59848	3.59946	0.566718	578.318	3.40831	13.8142
JendaJohnson	Wildhorse Canyon	Upper	JS43	Aphyric	2505.46	8220	652.272	0.666667	49.893	2.16577	15.9549	11.5929	0.1842	5.82989	9.55029	3.13467	1.28147	0.412906	51.3289	70.6327	125.8	30.7	331.2	412.9	20.3	489.4	149.1	30.4	8.4	21.5	203.8	103.9	17.9658	40.893	5.81612	25.9704	6.59049	2.12305	6.64878	1.0806	6.38109	1.26651	3.31201	0.459274	2.70539	0.421898	419.279	1.77902	9.9551
SylvanaBendana	Kiger Gorge	Upper	STM 10	Sparsley Plag Phyric	2377.74	7800.91	662	0.666667	49.5654	2.2692	15.7291	12.3834	0.197457	5.51388	9.44814	3.25053	1.20917	0.433585	48.2875	77.91	117.894	31.36	342.902	450.604	20.09	509.11	167.286	33.418	10.976	19.698	210.112	106.82	19.2897	44.1596	6.16997	27.5193	6.85746	2.22737	7.01921	1.1142	6.72337	1.32713	3.44383	0.482035	2.90174	0.449659	453.517	2.00029	10.6155
SylvanaBendana	Kiger Gorge	Upper	STM 11	Aphyric	2386.58	7829.9	670.839	0.666667	49.0862	2.06339	16.086	11.8177	0.179391	6.64213	10.1015	3.08744	0.610651	0.325702	54.1009	78.694	63.798	26.95	280.084	299.292	7.938	528.612	143.178	27.342	11.368	19.502	50.176	110.936	16.2811	37.1244	5.26693	23.5929	6.03029	2.06965	6.17232	0.969319	5.83831	1.11259	2.85666	0.395904	2.31394	0.352153	299.898	1.61046	11.2606
SylvanaBendana	Kiger Gorge	Upper	STM 12b	Plag Phyric to Sparsley Plag Phyric	2397.56	7865.91	681.812	0.333333	48.0904	2.57916	15.8162	13.4233	0.202448	5.78601	9.23112	3.38416	1.06978	0.41738	47.4776	86.534	107.506	30.184	381.22	387.1	16.464	565.166	163.758	34.496	10.094	21.168	232.064	117.012	17.6191	41.225	5.96339	27.0762	6.96413	2.34003	7.23682	1.16472	6.95899	1.37054	3.54552	0.49903	3.00656	0.475936	382.948	1.6747	10.4812
SylvanaBendana	Kiger Gorge	Upper	STM 13	Plag Phyric	2402.74	7882.9	686.993	0.333333	48.133	2.49678	15.8925	13.1891	0.20402	5.94163	9.36857	3.36133	0.977334	0.435797	48.5793	109.513	127.458	32.301	380.434	391.201	10.573	528.456	171.496	35.599	11.155	21.34	182.651	117.758	18.7519	43.7166	6.2678	28.5548	7.38348	2.3984	7.62472	1.21601	7.29979	1.43739	3.75666	0.516433	3.06537	0.485649	389.926	1.81616	10.6645
JendaJohnson	Wildhorse Canyon	Upper	JS44	Aphyric	2557.27	8390	704.088	0.666667	49.376	1.91131	16.2491	10.9625	0.176198	7.16371	10.2139	3.0782	0.564071	0.304994	57.8132	94.2991	97.6	26.2	267	259.5	7.6	492.1	121.5	24	8.7	18.7	62.9	102.9	14.7319	33.2201	4.72325	21.4446	5.51507	1.90328	5.757	0.918349	5.46137	1.06258	2.6738	0.364852	2.17309	0.333921	258.298	1.31926	10.2099
SylvanaBendana	Kiger Gorge	Upper	STM 15	Plag Phyric	2426.82	7961.9	711.073	0.666667	49.3507	2.78625	16.8696	12.5635	0.189919	3.96638	8.73255	3.60331	1.3704	0.567365	39.8342	46.942	10.878	28.126	357.602	540.764	19.208	552.818	220.01	41.846	14.21	22.834	287.336	119.168	25.2074	58.2893	8.29524	36.8055	9.31194	2.86412	9.14748	1.44188	8.74077	1.69422	4.41304	0.60792	3.66535	0.577163	540.551	2.85637	13.4844
JendaJohnson	Wildhorse Canyon	Upper	JS45	Plag Phyric	2572.51	8440	719.328	0.666667	49.4329	2.82183	14.8686	13.0667	0.213219	5.36069	8.93064	3.47042	1.30256	0.532421	46.2468	62.8796	82.7	33.3	403.9	480.6	20.3	438.3	211.7	40.8	12.7	21.8	272.8	121.9	22.8454	53.106	7.6228	34.4838	8.85558	2.73547	9.11032	1.48077	8.74772	1.74632	4.5113	0.631783	3.80158	0.601104	476.174	2.39861	12.582
JendaJohnson	Wildhorse Canyon	Upper	JS46	Mostly aphyric	2596.9	8520	743.712	0.333333	48.8574	1.9969	17.1306	12.19	0.18542	6.10729	8.66462	3.61694	0.901347	0.349399	51.2355	115.088	50	24.7	311.9	389.5	9.3	713.8	124.2	26.4	7.4	21.5	184.6	106.4	14.8777	34.4276	5.14152	23.4827	5.986	2.02219	6.08648	0.958131	5.67702	1.09754	2.86948	0.394866	2.32878	0.365499	378.388	0.994222	7.6935
SylvanaBendana	Kiger Gorge	Upper	STM 18	Sparsley Plag Phyric	2460.04	8070.9	744.296	0.333333	49.0194	1.95639	16.772	11.8602	0.1881	6.7069	9.22793	3.16251	0.804899	0.301726	54.2526	142.982	115.052	26.558	300.174	325.36	12.25	514.5	128.968	27.538	8.134	19.796	204.918	104.174	14.0586	32.2787	4.65803	21.1923	5.4879	1.88552	5.6873	0.923681	5.57503	1.08137	2.8132	0.397098	2.36527	0.36105	329.033	1.5623	7.83366
JendaJohnson	Wildhorse Canyon	Upper	JS47	Aphyric	2602.99	8540	749.808	0.333333	49.8857	2.96887	14.6776	13.425	0.210559	4.91283	8.2834	3.36917	1.69471	0.57218	43.4208	51.6305	31.1	32.8	435.2	548.7	28.6	454	222.5	41.8	12.2	22.7	230.1	127.5	25.3366	58.1023	8.23324	37.025	9.39658	2.76467	9.55886	1.50187	8.83392	1.7566	4.56871	0.632307	3.83559	0.604195	546.965	2.8758	13.31
JendaJohnson	Wildhorse Canyon	Upper	JS48	Aphyric	2606.04	8550	752.856	0.333333	50.0117	2.97062	14.6461	13.3432	0.209259	4.85979	8.24915	3.46843	1.6594	0.582341	43.3043	50.1082	31.3	33.5	427.4	572.6	28.4	458.3	231.8	42.6	13	23.3	267.6	131.3	25.4143	58.8051	8.33537	37.6475	9.43868	2.8534	9.57495	1.51784	8.98012	1.78229	4.58406	0.643764	3.8538	0.606628	556.576	2.95804	13.6078
JendaJohnson	Wildhorse Canyon	Upper	JS49	no description	2609.09	8560	755.904	0.333333	49.19	2.79502	15.3036	13.2391	0.204302	5.34393	8.70823	3.37325	1.32878	0.51385	45.8435	65.0563	55.4	34.2	422.6	484.7	20.8	480.3	199.4	37.8	11.3	23.2	216.6	124.4	22.0163	51.7213	7.37344	33.2199	8.5085	2.60008	8.61927	1.37716	8.15088	1.61974	4.15855	0.577178	3.52391	0.55005	483.144	2.32808	12.0719
JendaJohnson	Wildhorse Canyon	Upper	JS50	Plag Phyric	2615.18	8580	762	0.333333	48.9478	2.89506	15.3644	13.126	0.213894	5.31477	8.96084	3.48058	1.19801	0.498609	45.9205	61.2682	62.3	35.6	450.8	479.6	14.2	475.8	191.5	37.5	11.3	21.3	206.9	128.2	22.0985	50.9934	7.39862	33.5719	8.58027	2.67797	8.77995	1.39476	8.27501	1.64123	4.23579	0.58374	3.5476	0.550311	471.161	2.23133	11.8292
JendaJohnson	Wildhorse Canyon	Upper	JS51	Aphyric to Sparsly Plag Phyric	2609.09	8560	762	0.666667	48.7759	2.36706	16.4375	12.5727	0.197074	5.85515	9.02389	3.3933	0.97834	0.39907	49.409	111.471	46	31.3	385.4	404.2	15.3	513.4	153.5	31.2	8.5	23	140.5	113.4	16.6303	38.8191	5.63788	25.9439	6.84424	2.22209	7.10937	1.13892	6.5851	1.29663	3.3764	0.480325	2.83386	0.443586	392.344	1.52371	8.9182
JendaJohnson	Wildhorse Canyon	Upper	JS52	Aphyric	2621.28	8600	774.192	0.666667	49.4479	3.23803	14.5281	14.1139	0.229081	4.29655	7.87529	3.82866	1.75796	0.684507	38.965	33.307	10.4	33.4	403.3	648.2	27.4	444	260.7	47.6	14.8	23.9	358.1	139.1	29.6058	68.4494	9.73042	43.6382	10.9272	3.2244	10.9387	1.73311	10.2124	2.01727	5.2279	0.728008	4.40124	0.683687	639.815	3.16265	15.249
SylvanaBendana	Kiger Gorge	Upper	STM 21b	Aphyric	2492.65	8177.9	776.909	0.666667	48.2394	2.46363	16.0728	13.4394	0.205108	5.76544	8.97204	3.39921	1.00701	0.435986	47.3589	98.98	39.102	30.184	382.592	417.97	13.132	514.108	170.912	34.79	10.388	21.266	245.588	116.228	18.0556	43.5456	6.15091	28.3889	7.26435	2.40057	7.39967	1.20661	7.25191	1.42083	3.67666	0.509249	3.04031	0.464791	416.302	1.70822	10.4213
SylvanaBendana	Kiger Gorge	Upper	STM 25	Aphyric	2497.23	8192.9	781.481	0.666667	48.3241	2.19873	17.0718	12.4218	0.191062	6.01917	9.2683	3.30962	0.832661	0.362756	50.4016	120.736	43.218	27.538	351.722	370.93	9.604	553.308	143.374	30.478	9.114	21.952	157.192	110.152	15.3571	36.283	5.20197	23.9275	6.14921	2.0836	6.31134	1.03282	6.07254	1.21463	3.08047	0.438164	2.65428	0.396998	375.093	1.3947	8.62747
SylvanaBendana	Kiger Gorge	Upper	STM 29	Sparsly Plag Phyric to Phyric	2509.72	8233.9	793.978	0.666667	51.5587	1.82576	16.6669	10.3636	0.164677	5.85436	8.5568	3.37709	1.35898	0.273211	54.2263	116.13	166.11	24.402	280.868	454.72	23.618	491.372	159.74	27.44	9.8	19.992	178.36	97.51	17.121	38.9898	5.40219	23.4696	6.12759	1.9324	5.92551	0.963227	5.78411	1.13146	2.9364	0.411403	2.50442	0.391878	457.479	2.24034	9.12981
JendaJohnson	Wildhorse Canyon	Upper	JS53	Plag Phyric	2648.71	8690	801.624	0.666667	49.5444	2.14032	19.2427	10.4794	0.162644	3.96073	9.28468	3.71001	1.06323	0.411864	44.2155	56.9427	33.8	22.9	301.5	429.4	15.9	633.1	159.6	29.7	10	23.7	126.9	102.6	17.8086	41.073	5.83983	26.3654	6.72952	2.18188	6.61645	1.06486	6.29256	1.21978	3.17392	0.436021	2.61375	0.405573	420.26	1.74879	9.20968
SylvanaBendana	Kiger Gorge	Upper	STM 33	Aphyric	2526.79	8289.9	811.047	0.333333	48.8258	3.48551	14.0962	14.7648	0.233221	4.45809	7.90946	3.78704	1.71137	0.728529	38.7707	40.572	6.664	35.084	413.462	623.77	26.754	438.746	274.204	50.372	17.444	23.422	279.79	147.588	29.6212	69.6118	9.96694	45.0001	11.4418	3.35432	11.2903	1.79435	10.6921	2.06478	5.30957	0.74068	4.45178	0.674978	615.178	3.04242	16.7582
SylvanaBendana	Kiger Gorge	Upper	STM 34	Plag Phyric	2528.62	8295.9	812.876	0.333333	48.9987	3.20868	15.295	13.8611	0.217108	4.22519	8.12382	3.80428	1.60174	0.664401	38.9965	42.728	8.428	32.83	386.61	595.546	25.48	485.982	249.508	45.178	15.386	23.324	257.642	134.848	27.5292	65.6786	9.24884	41.404	10.3394	3.14905	10.3787	1.63995	9.62263	1.87911	4.86431	0.66254	4.08489	0.617251	589.818	2.79498	15.5847
JendaJohnson	Wildhorse Canyon	Upper	JS54	Aphyric	2660.9	8730	813.816	0.666667	48.1046	2.43	16.5935	12.4591	0.196482	6.31574	9.06921	3.43645	0.968944	0.426003	51.5284	134.01	141.3	26.9	347.7	402.9	11.3	502.1	156.2	30.4	9.4	22.7	206.6	113.9	17.9868	42.4223	6.15845	27.8999	7.19104	2.34327	7.23004	1.16613	6.88906	1.34514	3.47604	0.47706	2.78852	0.43986	396.191	1.53613	9.71875
SylvanaBendana	Kiger Gorge	Upper	STM 37	Aphyric	2544.17	8346.9	828.421	0.666667	52.6431	2.04479	16.6936	10.9086	0.171966	3.49009	6.23209	4.53317	2.36359	0.918994	40.1539	35.868	12.054	19.698	230.692	926.59	34.496	762.048	197.372	33.712	13.622	20.972	75.754	115.64	35.164	73.7783	10.1729	42.6104	9.19052	2.76752	8.12521	1.2339	6.96878	1.33941	3.49346	0.489025	2.98114	0.471246	924.732	2.57921	12.8902
JendaJohnson	Wildhorse Canyon	Upper	JS55	Plag Phyric	2676.14	8780	829.056	0.666667	49.3171	2.09443	18.9755	10.7096	0.154522	4.47096	9.44512	3.52942	0.922602	0.380709	46.6805	85.9885	68.5	22.4	298.6	396.4	10.2	600.2	143.9	28	8.2	23.3	133.1	99.7	16.4325	37.416	5.48251	24.8497	6.28277	2.11144	6.39559	1.01081	5.99821	1.14137	3.0081	0.406938	2.46922	0.376601	382.317	1.47253	8.63703
JendaJohnson	Wildhorse Canyon	Upper	JS56	Aphyric	2679.19	8790	832.104	0.666667	52.3123	2.63289	15.7101	11.6625	0.182621	3.83476	7.12777	3.75043	2.13331	0.653326	40.8129	31.2757	5.8	25.8	298.6	772.4	37.4	483	257.7	41.6	13.5	22.3	174.6	121.8	33.1985	72.1004	9.97593	43.1999	10.3573	2.94564	9.91072	1.54403	9.08495	1.79019	4.65088	0.646783	3.94685	0.604588	764.083	4.79236	15.4179
SylvanaBendana	Kiger Gorge	Upper	STM 40	Aphyric	2559.71	8397.9	843.965	0.666667	48.3263	2.60138	16.6464	13.7076	0.198032	5.20971	8.15787	3.52217	1.17916	0.451346	44.3526	106.526	55.468	26.754	324.38	476.084	20.874	526.75	187.278	35.182	11.27	22.344	309.386	122.402	20.4112	47.0261	6.69966	30.1696	7.67962	2.46969	7.67695	1.22889	7.18493	1.42278	3.65205	0.512109	3.06238	0.466689	469.185	1.96878	11.0653
JendaJohnson	Wildhorse Canyon	Upper	JS57	Aphyric	2697.48	8850	850.392	0.666667	52.6213	2.39492	15.3467	11.985	0.187048	4.19648	7.0083	3.56453	2.20617	0.489614	42.3398	34.1193	8.4	28	340.4	608.1	42.6	429	237.4	38.3	11.6	21.7	221	120.7	29.1736	63.0413	8.70574	37.3715	8.94308	2.50085	8.66228	1.39564	8.22676	1.61039	4.32062	0.603172	3.66012	0.579612	608.358	4.70933	13.534
SylvanaBendana	Kiger Gorge	Upper	STM 41	Aphyric	2589.89	8496.9	874.141	0.333333	48.4158	2.50856	16.9386	13.2994	0.192391	5.21789	8.28062	3.54317	1.16561	0.438067	45.139	110.446	55.566	25.48	316.54	458.836	19.698	544.096	180.614	32.928	11.27	22.54	313.012	119.07	19.3655	45.2959	6.34366	28.9072	7.3214	2.38047	7.30448	1.17889	6.95408	1.36698	3.56083	0.491135	2.94925	0.454974	448.994	1.89522	10.9133
SylvanaBendana	Kiger Gorge	Upper	STM 44	Plag Phyric	2593.85	8509.9	878.103	0.333333	49.2474	2.25275	17.2195	12.4955	0.186432	4.90264	8.53086	3.55498	1.21189	0.398059	45.1397	77.42	66.444	25.872	326.046	478.73	17.64	552.916	166.698	31.948	10.388	20.09	222.166	111.916	19.0947	43.5106	6.08473	27.222	6.86854	2.288	6.754	1.05069	6.50519	1.25978	3.35061	0.46882	2.76967	0.423181	480.667	2.21816	9.88363
JendaJohnson	Wildhorse Canyon	Upper	JS58	Aphyric	2737.1	8980	890.016	0.666667	49.3478	2.08951	17.1417	11.9981	0.186091	5.81725	8.39486	3.51265	1.12882	0.383263	50.4161	92.1155	84	25.4	324.6	442.9	18.9	536.7	144.6	28	8.1	22.3	135.2	110.7	18.2646	40.4878	5.86143	25.9188	6.57339	2.14047	6.62094	1.04583	6.20411	1.2162	3.16929	0.443473	2.65181	0.417853	436.858	1.95171	8.82728
SylvanaBendana	Kiger Gorge	Upper	STM 48	Aphyric	2609.09	8559.9	893.343	0.666667	48.5084	2.9426	15.4559	14.2078	0.20727	5.40209	7.66857	3.61958	1.46735	0.52042	44.363	100.058	76.244	29.008	371.812	566.636	24.206	456.288	220.206	38.808	13.622	21.756	119.658	137.592	23.9903	55.3445	7.84101	35.1418	8.71335	2.74799	8.82607	1.39198	8.19785	1.59354	4.0915	0.564323	3.41926	0.521891	561.096	2.70008	13.4578
JendaJohnson	Wildhorse Canyon	Upper	JS59	Plag Phyric	2764.54	9070	917.448	0.666667	51.237	2.88507	16.2515	12.4725	0.203637	3.25911	7.11667	4.00083	1.90963	0.664074	35.3998	30.9417	7.2	28.5	306.9	741.2	35.7	497.9	253.7	39.7	15.2	24.8	205.3	131.4	30.3664	67.8567	9.50917	41.8022	10.1297	3.01485	9.73887	1.53976	8.805	1.71673	4.42749	0.601158	3.64587	0.558067	736.391	3.77295	15.0725
JendaJohnson	Wildhorse Canyon	Upper	JS60	Aphyric	2785.87	9140	938.784	0.666667	51.0985	2.70008	15.479	12.8327	0.198596	4.0692	7.42364	3.79445	1.80383	0.600019	39.9396	42.0713	7.5	26.5	358.4	709.4	27.9	499.6	223.1	42.8	12.5	24.3	304.2	133.8	30.3907	62.6542	9.03088	39.6583	9.45018	2.71852	9.26339	1.45241	8.54252	1.69126	4.53593	0.621771	3.73186	0.596612	707.824	3.92229	12.8358
JendaJohnson	Wildhorse Canyon	Upper	JS61	Aphyric	2804.16	9200	969.264	0.666667	48.1535	2.63417	16.5012	13.39	0.194474	5.72848	8.5473	3.37651	1.04907	0.42526	47.2903	112.024	65.8	28.3	347.7	452.5	15.1	477.1	184.9	43.6	10.4	22.7	279	127	24.1873	44.462	7.66317	34.5922	8.70926	2.62897	9.12975	1.46684	8.76947	1.74615	4.69597	0.644255	3.86504	0.606405	444.19	2.16157	10.7639
JendaJohnson	Wildhorse Canyon	Upper	JS63	Aphyric	2840.74	9320	993.648	0.666667	48.5917	2.5768	16.2771	13.1705	0.195536	5.90641	8.36123	3.43033	1.06523	0.425161	48.4662	119.647	69.1	28.8	345.4	429.5	19.7	488.7	183.5	35.2	10.5	22.2	317.6	125.9	19.2723	44.0629	6.35898	28.7256	7.35381	2.3592	7.49342	1.23326	7.22151	1.44051	3.79671	0.51527	3.10713	0.48173	421.245	2.11981	10.734
JendaJohnson	Wildhorse Canyon	Upper	JS64	Plag Phyric	2840.74	9320	993.648	0.666667	48.3623	1.95542	17.5245	11.7988	0.168659	6.57167	9.30251	3.29994	0.716303	0.299866	53.8756	152.148	46.2	24.3	296.5	305.5	8.2	589.9	123.4	24.1	7.6	22.6	93.1	103.7	12.4675	28.795	4.34864	20.5071	5.37484	1.86529	5.49664	0.893752	5.35079	1.01923	2.64919	0.359565	2.13712	0.32835	293.471	1.01472	7.19449
JendaJohnson	Wildhorse Canyon	Upper	JS65	Aphyric	2846.83	9340	999.744	0.666667	53.1101	2.33253	15.9202	11.4605	0.179803	3.22441	6.43083	4.34406	2.24195	0.75569	37.1079	12.7886	3	21.4	270.2	887.6	33.8	664.5	225.9	36.4	13.3	21.1	65.2	124.1	32.6957	69.2851	9.60894	41.0559	9.37444	2.68639	8.56669	1.29356	7.46049	1.44938	3.84758	0.537894	3.31778	0.517501	874.313	3.25407	12.383
JendaJohnson	Wildhorse Canyon	Upper	STM 9/JS-66	Aphyric	2865.12	9400	1018	0.333333	53.9818	2.67772	14.824	11.4382	0.187711	3.32883	6.87774	3.69002	2.37141	0.622571	37.9005	17.444	1.176	29.204	273.028	729.414	53.704	426.888	266.364	45.57	16.17	20.58	227.752	119.266	31.7519	70.6486	9.60843	41.3885	10.061	2.81439	9.69354	1.5578	9.21952	1.79921	4.79902	0.65443	4.0068	0.62127	726.028	5.94507	15.6902
JendaJohnson	Wildhorse Canyon	Upper	JS66	Aphyric	2865.12	9400	1018.03	0.333333	51.533	2.25126	16.2047	11.8988	0.177435	4.74728	7.85983	3.43759	1.49582	0.394225	45.5543	57.7008	61.8	27.8	307.6	606.2	27.4	489.5	180.3	33	10.1	22.8	189.9	114.4	20.8718	45.7945	6.44005	28.3379	7.10148	2.25179	7.01116	1.13249	6.80159	1.34349	3.48045	0.486969	3.01386	0.466176	603.234	3.24526	9.54254
JendaJohnson	Wildhorse Canyon	Upper	STM 1c/JS-69	Plag Phyric	2926.08	9600	1066.9	0.666667	49.6182	2.33505	16.3107	12.9127	0.190693	5.23857	7.99935	3.66499	1.25702	0.472714	45.9688	74.578	60.76	27.832	354.466	521.262	19.894	635.334	162.386	30.968	9.996	21.854	146.216	115.346	20.5498	45.513	6.523	29.0823	7.2274	2.28842	6.97963	1.08805	6.42492	1.24334	3.21766	0.432305	2.65661	0.406096	518.559	2.04918	9.68002
JendaJohnson	Wildhorse Canyon	Upper	STM 4?	Plag Phyric	2950	9678	1091	0.666667	48.4617	2.38426	17.524	12.6571	0.178447	5.14843	8.88166	3.46045	0.933228	0.370718	46.0343	100.352	54.488	24.892	333.396	374.164	12.152	507.64	158.564	30.576	9.702	22.932	193.942	111.818	17.1107	38.2796	5.56219	25.0988	6.29407	2.15459	6.6521	1.05121	6.29525	1.24598	3.20656	0.43411	2.65879	0.397535	371.606	1.83845	9.59205
JendaJohnson	Wildhorse Canyon	Upper	STM 6/JS-72	Aphyric	2962.66	9720	1116	0.666667	48.3924	2.32199	16.4248	13.039	0.19458	6.197	8.77793	3.36028	0.930465	0.361531	49.9172	126.42	63.112	28.714	327.222	379.946	15.68	493.332	160.622	33.124	9.8	21.168	196.98	115.15	16.885	38.0335	5.49211	25.0105	6.47371	2.19226	6.90273	1.09898	6.7001	1.34051	3.51987	0.480354	2.9375	0.446963	377.652	1.73359	9.49869
Nicole Moore	Tuffy Creek	Upper	NMSB-1		1587.97	5209.88		0.666667	48.4222	2.67633	15.2458	14.3908	0.200881	5.4095	8.60091	3.45802	1.17692	0.418572	44.0811	78.4	58.4	32	420.3	485.9	19.2	466.6	184.3	34.5	10.3	21.9	317.8	133.7	19.9634	44.3034	6.3732	28.7335	7.40936	2.3242	7.61992	1.1771	7.32009	1.45125	3.71681	0.521878	3.14751	0.494438	469.999	2.56214	10.056
Nicole Moore	Tuffy Creek	Upper	NMSB-2		1674.01	5492.15		0.333333	52.5948	2.65232	13.5335	13.5782	0.216749	3.94533	7.73063	3.56586	1.77692	0.405633	37.8629	12.7635	68.139	41.004	418.08	586.618	37.989	359.287	211.15	41.004	13.065	22.2105	203.412	134.871	21.7878	47.9871	7.00471	31.5289	8.10634	2.47156	8.54869	1.40138	8.50722	1.70058	4.42476	0.619073	3.73637	0.563694	579.962	3.72005	10.9092
Nicole Moore	Tuffy Creek	Upper	NMSB-3		1674.88	5495		0.333333	52.7252	2.62611	13.5301	13.6166	0.22092	3.87732	7.74997	3.39362	1.85373	0.406506	37.3887	15.1755	69.4455	39.4965	401.598	596.367	40.5015	358.383	213.663	43.215	12.3615	23.517	215.773	136.077	22.7039	49.6361	7.12335	31.9435	8.35839	2.45341	8.62812	1.42663	8.80744	1.76152	4.5942	0.634711	3.8824	0.57818	598.307	3.73566	11.0724
Nicole Moore	Tuffy Creek	Upper	NMSB-4		1680.98	5515.02		0.666667	52.6053	2.62412	13.6719	13.5592	0.214468	4.02752	7.79133	3.35341	1.7739	0.378828	38.3824	15.9795	74.772	40.2	420.09	615.562	39.2955	367.629	209.341	40.2	12.462	22.713	184.216	136.579	20.47	45.1783	6.54943	28.9526	7.59408	2.37519	7.95391	1.29409	7.9986	1.60552	4.15637	0.587075	3.58069	0.540919	597.039	3.60387	10.6037
Nicole Moore	SW tip of Mickey Butte	Upper	NMSB-45	Plag Phyric	1294.49	4247		0.666667	48.1	1.75792	16.8254	11.2264	0.172794	7.78202	10.176	3.02076	0.666942	0.27179	59.2452	162.006	115.977	28.743	302.002	265.421	9.045	536.67	107.635	24.8235	6.7335	19.698	159.996	96.48	10.6342	25.9783	3.74799	17.8458	4.52375	1.65875	4.98476	0.813126	4.91795	0.965064	2.49746	0.333765	1.98614	0.32572	258.828	0.680253	5.9393
Nicole Moore	SW tip of Mickey Butte	Upper	NMSB-46	Plag Phyric	1326.01	4350.44		0.666667	49.5866	2.99627	16.546	12.2747	0.165032	4.014	8.41095	3.82489	1.55119	0.630362	40.6805	39.0945	9.9495	28.2405	346.926	543.404	29.6475	493.053	245.923	42.9135	16.08	23.0145	225.823	128.539	25.2234	60.2561	8.44824	38.0793	9.40705	2.96708	9.6444	1.50893	8.94492	1.71169	4.49097	0.621205	3.72188	0.572719	534.03	2.53329	14.3314
Nicole Moore	SW tip of Mickey Butte	Upper	NMSB-47	Plag Phyric	1400.76	4595.66		0.666667	48.2231	2.15519	16.889	12.3275	0.168799	6.75196	8.96126	3.26479	0.911906	0.346472	53.4585	133.564	48.642	27.135	314.766	329.941	13.668	490.942	146.529	28.4415	10.251	20.904	223.009	113.263	14.543	34.6615	4.89358	22.7768	5.88463	2.0052	6.11552	0.982752	5.91964	1.16358	2.96408	0.429569	2.51612	0.396138	324.89	1.28642	8.29518
Average									49.8006	2.46905	16.0106	12.4989	0.193028	5.21426	8.49569	3.49421	1.35162	0.472004	46.2814	76.0936	62.3558	29.0782	344.877	499.611	22.6334	504.999	187.123	35.1568	11.281	21.9348	201.412	117.693	21.4683	48.5123	6.902	30.838	7.7294	2.42573	7.78031	1.2424	7.38532	1.45232	3.77574	0.52414	3.15658	0.489624	494.619	2.44838	11.2564
Std Dev									1.58996	0.403433	1.12364	1.07958	0.0172923	1.05446	0.860049	0.279428	0.458508	0.131362	5.63169	37.5242	39.5316	4.33506	52.8409	140.348	10.7431	74.3288	41.737	6.43102	2.43586	1.35196	68.0977	12.8095	5.62545	11.9698	1.62651	6.85172	1.57823	0.374242	1.48632	0.232298	1.35731	0.270405	0.710626	0.0985647	0.609793	0.0941391	139.977	1.00073	2.42921
Median									49.3492	2.4802	16.1454	12.4668	0.193432	5.32585	8.55205	3.46444	1.2585	0.434691	46.1406	75.999	62.05	28.4	340.35	479.165	19.995	492.577	183.5	34.645	11.2125	22.076	205.109	117.385	20.5099	45.4045	6.53622	28.9299	7.36865	2.37783	7.55667	1.21131	7.20322	1.4218	3.66435	0.510679	3.05134	0.473591	471.248	2.28421	10.8365
[truncated: 23 more columns]

## Sheet: Comparisons
	SiO2	TiO2	Al2O3	FeO*	MnO	MgO	CaO	Na2O	K2O	P2O5	Mg#	Ni	Cr	Sc	V	Ba	Rb	Sr	Zr	Y	Nb	Ga	Cu	Zn	La ppm	Ce ppm	Pr ppm	Nd ppm	Sm ppm	Eu ppm	Eu/Eu*	Gd ppm	Tb ppm	Dy ppm	Ho ppm	Er ppm	Tm ppm	Yb ppm	Lu ppm	Ba ppm	Th ppm	Nb ppm	Y ppm	Hf ppm	Ta ppm	U ppm	Pb ppm	Rb ppm	Cs ppm
Upper Avg	49.8006	2.46905	16.0106	12.4989	0.193028	5.21426	8.49569	3.49421	1.35162	0.472004	46.2814	76.0936	62.3557	29.0782	344.877	499.611	22.6334	504.999	187.123	35.1568	11.281	21.9348	201.412	117.693	21.4683	48.5123	6.902	30.838	7.7294	2.42573	0.943595	7.78031	1.2424	7.38532	1.45232	3.77574	0.52414	3.15658	0.489624	494.619	2.44838	11.2564	36.2016	4.96073	0.726977	0.739172	5.11119	22.6991	0.363814
Upper SD	1.58996	0.403433	1.12364	1.07958	0.0172923	1.05446	0.860049	0.279428	0.458508	0.131362	5.63169	37.5242	39.5316	4.33506	52.8409	140.348	10.7431	74.3288	41.737	6.43102	2.43586	1.35196	68.0977	12.8095	5.62545	11.9698	1.62651	6.85172	1.57823	0.374242		1.48632	0.232298	1.35731	0.270405	0.710626	0.0985647	0.609793	0.0941391	139.977	1.00073	2.42921	6.82235	1.05881	0.156474	0.380127	1.76919	10.8294	0.328888
Upper Median	49.3492	2.4802	16.1454	12.4668	0.193432	5.32585	8.55205	3.46444	1.2585	0.434691	46.1406	75.999	62.05	28.4	340.35	479.165	19.995	492.577	183.5	34.645	11.2125	22.076	205.109	117.385	20.5099	45.4045	6.53622	28.9299	7.36865	2.37783	0.962496	7.55667	1.21131	7.20322	1.4218	3.66435	0.510679	3.05134	0.473591	471.248	2.28421	10.8365	35.0355	4.85063	0.709434	0.686698	5.04917	20.1084	0.235357
Lower Avg	49.274	2.11537	15.7738	11.4372	0.179392	7.31735	10.0187	2.88352	0.722961	0.277746	56.6577	148.475	297.185	29.7037	330.523	238.849	11.9044	390.605	145.319	27.9783	9.62175	20.1983	165.885	98.6797	13.2017	31.5495	4.54477	20.8492	5.55321	1.90262	1.00493	5.91733	0.972106	5.81121	1.14024	2.92529	0.403844	2.38433	0.363638	229.875	1.4282	8.88325	27.9821	3.79985	0.599348	0.404171	2.59156	11.4427	0.5015
Lower SD	0.676224	0.325241	1.31051	0.880259	0.015763	1.6433	0.531046	0.298645	0.228285	0.060343	5.91469	64.998	178.976	3.0485	38.8431	64.3936	5.20804	68.1223	27.0877	3.98719	2.01647	1.80894	42.4067	9.51776	3.03817	6.5746	0.895615	3.90367	0.930659	0.270836		0.928256	0.148094	0.873425	0.17065	0.431656	0.0606521	0.355576	0.0556144	63.5042	0.497019	1.78091	4.14754	0.671002	0.120181	0.149719	0.782241	4.80644	1.37578
Lower Median	49.163	2.08052	15.3307	11.3762	0.179178	7.15964	10.1269	2.91143	0.689798	0.278023	56.2228	133.151	245.22	29.9	317.077	230.648	10.7535	382.302	144.82	27.4	9.7485	20.301	169.1	96.5	12.694	30.7938	4.40785	20.6659	5.50721	1.87429	1.00591	5.76709	0.96261	5.68193	1.11716	2.86467	0.3915	2.32423	0.353333	222.888	1.32576	8.61126	27.5622	3.7567	0.584459	0.381483	2.47928	9.85254	0.173638
New Lower Avg	49.7226	2.43272	15.8597	12.3998	0.192953	5.48997	8.94066	3.21596	1.2866	0.459108	47.3855	81.6841	82.0804	30.7001	342.334	459.851	25.1306	464.417	180.872	34.5998	11.183	20.6069	213.851	112.004	19.9907	46.2597	6.46399	28.9363	7.26842	2.35403	0.967197	7.43261	1.19289	7.18409	1.40767	3.68138	0.510342	3.09831	0.472599	448.376	2.30169	11.2502	35.1186	4.82727	0.739786	0.757223	4.71598	24.1873	0.385844
New Lower SD	1.18194	0.495913	0.728271	1.03272	0.0251852	1.52219	0.718196	0.317887	0.35711	0.135862	8.02664	41.6148	70.0862	2.6447	54.6687	141.859	10.4675	30.8897	44.3492	6.7666	2.56051	1.73454	59.006	14.3704	5.44485	12.2638	1.6763	7.18992	1.67262	0.429126		1.61294	0.248326	1.47378	0.283913	0.750576	0.104547	0.626231	0.0953348	141.879	0.839383	2.5304	7.0756	1.1616	0.166418	0.285644	1.63664	10.5328	0.303251
New Lower Median	49.5738	2.3805	15.885	11.9834	0.183765	5.40083	8.67422	3.30844	1.321	0.509743	45.6658	65.3335	52.074	30.019	314.523	471.566	24.2055	459.063	203.655	35.1945	12.0978	20.4375	205.084	111.501	22.8117	52.1555	7.18377	31.5773	7.62013	2.44708	0.961651	7.74297	1.2296	7.36301	1.43711	3.81748	0.525252	3.17659	0.479709	457.67	2.5339	12.2656	36.2378	5.3552	0.785985	0.799607	5.08442	23.017	0.290815
[truncated: 16 more columns]

## Sheet: Lower A Bootstrap
100 iterations
Average
Repeat Number	SiO2	TiO2	Al2O3	FeO*	MnO	MgO	CaO	Na2O	K2O	P2O5	Mg#	Ni	Cr	Sc	V	Ba	Rb	Sr	Zr	Y	Nb	Ga	Cu	Zn	La ppm	Ce ppm	Pr ppm	Nd ppm	Sm ppm	Eu ppm	Gd ppm	Tb ppm	Dy ppm	Ho ppm	Er ppm	Tm ppm	Yb ppm	Lu ppm	Ba ppm	Th ppm	Nb ppm	Y ppm	Hf ppm	Ta ppm	U ppm	Pb ppm	Rb ppm	Cs ppm	Sr ppm
1	49.9512	2.40707	15.786	12.3414	0.191713	5.45441	8.82686	3.25106	1.33303	0.457283	47.358	79.9861	81.0318	30.555	339.375	485.989	26.444	462.5	183.539	34.5461	11.2802	20.5125	215.047	111.958	20.2774	46.6751	6.50404	29.0463	7.25906	2.34955	7.40907	1.18794	7.16098	1.40421	3.66748	0.508083	3.08946	0.471546	474.49	2.35164	11.3777	35.0172	4.88252	0.74688	0.777006	4.81959	25.3969	0.411702	465.682
2	49.7937	2.5033	15.8096	12.4991	0.195271	5.28243	8.84404	3.25827	1.33523	0.479098	46.2715	76.1578	72.7367	30.8783	348.801	472.416	26.8265	464.823	187.205	35.6822	11.6116	20.8016	220.446	114.067	20.7809	48.0925	6.71647	30.0502	7.53092	2.42424	7.67248	1.23108	7.41017	1.45032	3.80165	0.526618	3.19771	0.487618	461.402	2.40476	11.6475	36.2206	5.00405	0.764904	0.792358	4.91214	25.9775	0.440121	468.316
3	49.5707	2.41821	15.934	12.4003	0.193347	5.57522	9.02028	3.17449	1.25887	0.454639	47.537	85.4859	80.8214	30.6971	338.865	449.679	25.2981	465.77	178.317	34.143	11.0744	20.5115	209.06	110.966	19.7397	45.6448	6.37701	28.5427	7.1857	2.33195	7.36096	1.1811	7.11213	1.39219	3.64301	0.505034	3.06502	0.467797	437.646	2.25028	11.1609	34.7154	4.75067	0.734048	0.743387	4.61017	24.2842	0.368724	468.271
4	49.6431	2.43784	15.8226	12.4397	0.191449	5.566	8.93344	3.22921	1.2816	0.455097	47.6553	83.169	81.8729	30.9575	348.512	451.629	25.3005	459.327	179.473	34.5314	11.1912	20.6444	214.255	112.489	19.7683	45.8325	6.41652	28.7657	7.24774	2.35393	7.40891	1.19063	7.1874	1.40787	3.6863	0.509946	3.08889	0.470723	440.282	2.23183	11.2281	35.0918	4.8048	0.739183	0.735377	4.58777	24.3401	0.39881	462.344
5	49.8721	2.49517	15.8258	12.4619	0.19183	5.23535	8.79857	3.28467	1.35247	0.482104	46.053	74.885	71.7709	30.7395	344.741	484.376	27.0048	463.617	188.537	35.6445	11.6542	20.8424	218.152	113.952	20.9537	48.3847	6.7483	30.1327	7.54205	2.42541	7.66965	1.2302	7.4099	1.44987	3.80174	0.525836	3.19692	0.486604	472.925	2.43761	11.7173	36.1884	5.02947	0.771242	0.806243	4.96798	26.0703	0.433626	466.651
6	49.848	2.44982	15.8627	12.3764	0.188916	5.40319	8.83599	3.25644	1.3143	0.464225	47.19	77.5531	76.7428	30.4524	341.235	478.602	24.9526	460.15	184.587	34.9124	11.3137	20.7021	211.366	112.656	20.3729	47.0582	6.55964	29.3303	7.34961	2.37428	7.50238	1.20371	7.25118	1.42037	3.71963	0.514779	3.12906	0.476623	466.525	2.39282	11.4251	35.4578	4.92255	0.752961	0.783964	4.84618	23.9366	0.362395	463.49
7	49.6582	2.51797	15.7945	12.5811	0.192206	5.30209	8.91244	3.24941	1.31581	0.476321	46.0484	77.811	77.2078	31.2462	348.529	466.095	25.5083	464.465	186.333	35.7119	11.5235	20.9151	225.608	114.332	20.5318	47.6252	6.66954	29.8869	7.53064	2.4283	7.68542	1.23378	7.42457	1.45482	3.80571	0.527655	3.19937	0.486967	454.597	2.34231	11.5362	36.2692	4.9808	0.758795	0.763464	4.82057	24.6105	0.396844	467.543
8	49.7921	2.46189	15.8561	12.4256	0.191387	5.36182	8.8512	3.26863	1.31644	0.474737	46.7399	77.4766	73.7155	30.638	342.689	469.321	25.7609	463.849	184.07	35.1897	11.4452	20.7616	213.668	112.998	20.5766	47.5429	6.63661	29.6346	7.4238	2.38939	7.5622	1.21309	7.30663	1.43126	3.7514	0.519036	3.15363	0.480009	457.795	2.39037	11.5056	35.7219	4.91823	0.757788	0.789243	4.87338	24.8354	0.401861	466.85
9	49.8574	2.42739	15.8305	12.3678	0.198272	5.43715	8.90872	3.20419	1.30611	0.462479	47.3233	80.4281	83.0144	30.4154	340.902	470.629	26.0281	468.957	182.995	34.5415	11.2697	20.4954	212.48	111.848	20.2668	46.7966	6.52423	29.1566	7.2855	2.35454	7.45071	1.19293	7.18138	1.40594	3.67358	0.510196	3.09703	0.474331	459.395	2.358	11.348	35.0914	4.86766	0.744182	0.780594	4.84579	25.0753	0.413344	472.31
10	49.5578	2.38462	15.8361	12.3774	0.186499	5.77879	9.02344	3.19619	1.22328	0.435913	48.6364	89.3109	93.2186	31.0321	342.199	444.987	23.2795	457.629	175.293	33.8567	10.8203	20.4462	212.28	110.952	19.0126	44.1567	6.19343	27.8364	7.05442	2.30846	7.22466	1.16406	7.02535	1.37867	3.60325	0.49857	3.02267	0.459848	433.644	2.12314	10.8544	34.3316	4.68609	0.715134	0.694634	4.38827	22.2938	0.339316	460.346
11	49.5054	2.42667	15.8077	12.4603	0.191024	5.68209	9.05125	3.18703	1.24362	0.444908	48.039	87.8314	91.9649	31.255	346.767	440.057	24.0772	462.59	176.484	34.2354	10.9344	20.5529	215.27	111.746	19.2483	44.7766	6.28507	28.2651	7.15702	2.33515	7.34423	1.1798	7.11041	1.39317	3.64296	0.504968	3.05946	0.465678	428.767	2.13523	10.9429	34.7398	4.72317	0.718237	0.696819	4.44883	23.0983	0.360458	465.363
12	49.7175	2.41441	15.8814	12.3493	0.188793	5.53489	8.96975	3.22937	1.25592	0.458656	47.5787	83.9323	90.5504	30.6641	338.387	446.865	23.809	464.7	178.146	34.3962	11.0448	20.6893	213.225	111.499	19.744	45.8013	6.40686	28.7372	7.2332	2.34312	7.38062	1.18644	7.13802	1.40022	3.66283	0.507203	3.07627	0.467142	435.883	2.27123	11.1127	34.9119	4.76866	0.731917	0.744104	4.63411	22.9117	0.390001	468.015
13	49.6279	2.47697	15.8436	12.5266	0.192982	5.38613	8.95212	3.22739	1.29987	0.46648	46.561	78.9814	71.1141	31.0268	346.83	454.756	25.6887	462.959	182.356	35.1985	11.4397	20.7747	226.512	113.085	20.3054	46.9525	6.5665	29.3906	7.3931	2.38147	7.5601	1.21453	7.31406	1.43401	3.74999	0.52022	3.15313	0.481162	442.557	2.3296	11.4489	35.7632	4.87671	0.7521	0.762618	4.75378	24.6918	0.38758	466.054
14	49.7696	2.4081	15.9815	12.309	0.191316	5.38854	8.94796	3.23071	1.31905	0.45423	47.0731	80.7797	73.2269	30.4716	338.087	463.882	26.4898	468.244	179.708	34.3134	11.2072	20.5919	214.806	111.149	19.9397	45.9881	6.41923	28.6902	7.20933	2.33699	7.36579	1.18307	7.12643	1.39682	3.65406	0.506648	3.08343	0.470552	452.386	2.30257	11.213	34.8494	4.78843	0.736673	0.759808	4.69934	25.539	0.408395	471.076
15	49.5998	2.45195	15.9638	12.4198	0.192594	5.41482	9.0166	3.19625	1.28591	0.458605	46.8999	81.3128	75.4541	30.8333	344.441	447.815	25.7854	464.963	180.1	34.7016	11.28	20.6764	222.673	111.901	19.8903	46.0953	6.44446	28.8797	7.28406	2.36071	7.44578	1.19823	7.21959	1.41206	3.70157	0.513106	3.11343	0.475248	436.139	2.27855	11.2766	35.2559	4.81272	0.742151	0.750362	4.63625	24.8308	0.402567	468.023
16	49.6356	2.42837	15.8173	12.4626	0.195362	5.6177	8.92344	3.19316	1.27047	0.456029	47.8969	82.9197	77.3849	30.7899	345.087	461.105	24.834	460.675	180.616	34.5266	11.2314	20.4428	213.873	112.075	19.9614	46.1604	6.44983	28.8243	7.24189	2.34728	7.40965	1.18943	7.17925	1.40632	3.68039	0.510148	3.08754	0.473261	449.431	2.28028	11.2914	35.0654	4.81768	0.744151	0.750823	4.68998	23.8438	0.359057	463.86
17	49.7819	2.41308	15.9187	12.3211	0.193384	5.43848	8.98385	3.21176	1.28041	0.45735	47.3905	80.6716	82.1184	30.4633	340.037	450.029	24.9686	467.53	178.961	34.4929	11.1697	20.5939	220.013	111.241	19.9201	46.0995	6.43657	28.8188	7.22943	2.33608	7.38749	1.18745	7.14554	1.40014	3.66334	0.508399	3.08813	0.47133	438.794	2.32485	11.1862	34.982	4.78274	0.73455	0.766099	4.72704	24.0486	0.405557	471.082
18	49.67	2.38155	15.9288	12.3237	0.19138	5.59459	9.01787	3.19096	1.25641	0.444763	48.1389	83.3313	83.1968	30.5734	337.783	448.163	23.3068	465.709	175.48	34.099	10.8784	20.4816	214.916	110.542	19.4541	45.0264	6.29744	28.1872	7.09329	2.30339	7.27647	1.16926	7.03698	1.38201	3.60809	0.501213	3.04636	0.465151	436.592	2.25602	10.9216	34.5062	4.68825	0.718816	0.734948	4.61737	22.3868	0.329513	469.11
19	49.7131	2.42304	15.9403	12.3573	0.192378	5.43252	8.99676	3.20396	1.28878	0.451886	47.2666	81.2616	83.0889	30.628	341.297	457.008	24.8504	466.406	179.753	34.4048	11.0465	20.6538	215.085	111.632	19.6999	45.6228	6.38253	28.5948	7.2023	2.34105	7.37849	1.18581	7.13941	1.40044	3.65344	0.507243	3.08536	0.470751	445.502	2.27551	11.0994	34.9095	4.79174	0.730698	0.746697	4.66059	23.9817	0.375857	469.412
20	49.7138	2.4911	15.8173	12.5156	0.193357	5.3633	8.89906	3.23349	1.30484	0.468181	46.5959	77.9307	73.4582	30.8511	347.996	469.235	25.9104	460.964	186.21	35.3055	11.5154	20.7454	221.33	113.624	20.4659	47.3339	6.61349	29.6023	7.43944	2.39971	7.59852	1.2208	7.35849	1.44128	3.76929	0.522437	3.16879	0.48403	457.076	2.36287	11.5521	35.923	4.96462	0.759675	0.77829	4.82157	24.9313	0.389074	463.905
21	49.6932	2.45139	15.8658	12.4362	0.191356	5.40513	9.00137	3.22239	1.26502	0.468157	46.823	81.1687	89.0264	30.7858	338.578	453.429	23.5596	469.641	181.477	34.8758	11.2244	20.7571	220.838	112.238	20.0648	46.577	6.52077	29.1956	7.35325	2.37331	7.50403	1.20506	7.2483	1.42088	3.71325	0.515397	3.12471	0.47572	442.148	2.31048	11.2255	35.4162	4.84251	0.739723	0.756619	4.76386	22.6507	0.370367	472.522
22	49.6744	2.40859	15.862	12.3849	0.191971	5.54972	9.02896	3.19039	1.25883	0.450262	47.6151	83.8449	94.0332	30.8696	341.714	443.574	23.6536	463.668	176.854	34.2482	10.872	20.6867	217.304	111.47	19.4611	45.156	6.32568	28.3859	7.14961	2.32483	7.33313	1.17844	7.09176	1.39256	3.62657	0.503499	3.05578	0.465102	432.131	2.23089	10.9905	34.6893	4.72873	0.724095	0.729283	4.57717	22.7606	0.372797	466.968
23	49.7235	2.46339	15.699	12.5029	0.192871	5.51972	8.91023	3.25104	1.26904	0.468405	47.54	79.4275	86.6605	30.8366	347.947	457.85	23.4387	461.736	182.51	35.0237	11.3056	20.7068	214.718	113.335	20.2424	46.958	6.5734	29.3959	7.37314	2.3732	7.5411	1.20769	7.2851	1.42714	3.73238	0.517148	3.13094	0.477204	445.815	2.32396	11.3263	35.5944	4.87891	0.745194	0.765425	4.82218	22.393	0.342913	464.442
24	49.6973	2.44203	15.8231	12.4384	0.196038	5.46247	9.00687	3.18786	1.29239	0.453496	47.2076	82.0004	88.3785	30.9657	348.41	450.84	25.5665	464.24	180.184	34.5002	11.1655	20.6543	224.161	112.272	19.7323	45.7737	6.40647	28.7409	7.23347	2.35028	7.41401	1.19078	7.1808	1.40556	3.66885	0.509414	3.08538	0.471676	439.413	2.2422	11.202	35.0405	4.8107	0.735977	0.738872	4.62431	24.5854	0.418383	467.512
25	49.5613	2.44514	15.7895	12.5094	0.191272	5.56665	9.00001	3.21907	1.26315	0.454507	47.3753	84.8971	84.0869	31.1393	345.969	446.519	24.6299	463.162	179.031	34.5101	11.1861	20.6735	219.063	112.452	19.7095	45.6924	6.40781	28.7429	7.25983	2.35286	7.43387	1.19363	7.1968	1.41212	3.68676	0.511226	3.092	0.471228	434.693	2.20274	11.1705	35.1361	4.78509	0.733501	0.720769	4.57229	23.6045	0.371428	465.691
26	49.693	2.37668	15.9623	12.3196	0.190227	5.52337	9.01964	3.19684	1.27638	0.441957	47.5909	84.1904	81.2189	30.6566	336.339	452.874	24.7366	465.904	176.289	33.9668	10.9675	20.5243	220.823	110.498	19.4214	44.8546	6.27448	28.0921	7.08536	2.30611	7.25298	1.16811	7.036	1.38319	3.60424	0.500608	3.04091	0.464506	441.445	2.2286	10.9865	34.438	4.6997	0.723345	0.728873	4.55542	23.8186	0.376084	469.029
27	49.8156	2.39017	15.8429	12.3188	0.19133	5.55131	8.89621	3.24442	1.2978	0.451448	47.8982	82.9377	81.8111	30.5221	340.258	467.84	25.6771	464.221	179.603	34.154	11.1426	20.4652	208.796	111.368	19.8438	45.8022	6.39827	28.5911	7.17387	2.3282	7.32592	1.17558	7.0945	1.39115	3.63767	0.503633	3.06014	0.466976	456.662	2.26941	11.1645	34.676	4.78602	0.733613	0.75266	4.685	24.6982	0.396552	466.902
28	49.6276	2.48812	15.9586	12.4758	0.18999	5.30055	8.92776	3.23839	1.32564	0.467611	46.2041	78.039	66.4546	30.9251	346.437	460.376	26.748	461.53	183.473	35.175	11.4766	20.8683	222.2	113.099	20.3187	46.9919	6.56499	29.395	7.40871	2.39493	7.56172	1.21621	7.32858	1.43397	3.76065	0.520439	3.15976	0.481206	448.222	2.33391	11.5115	35.7763	4.90541	0.758533	0.766005	4.71632	25.7704	0.40988	464.51
29	49.7393	2.48686	15.7825	12.4969	0.190897	5.39382	8.86418	3.25825	1.31706	0.470221	46.6465	78.8575	77.1148	31.0134	348.981	466.545	26.4568	458.57	184.991	35.3006	11.4552	20.8211	217.914	113.716	20.4523	47.3159	6.61087	29.624	7.43757	2.40057	7.59071	1.21853	7.34172	1.43737	3.76467	0.520583	3.16037	0.480326	454.665	2.34454	11.5469	35.8569	4.94818	0.758528	0.772743	4.77633	25.4603	0.418818	461.604
30	49.6642	2.41756	15.8467	12.3955	0.191974	5.56836	9.0076	3.20235	1.25102	0.45469	47.7685	83.4545	88.8994	30.7303	341.461	448.466	23.7056	464.522	178.472	34.3606	11.0541	20.5765	215.106	111.515	19.693	45.6697	6.391	28.6243	7.20393	2.33426	7.37463	1.18421	7.13559	1.39823	3.65471	0.506842	3.07383	0.468677	436.789	2.25736	11.0897	34.8736	4.7649	0.72993	0.743064	4.65137	22.7176	0.355541	467.351
31	49.7901	2.41219	16.0089	12.3127	0.193415	5.34095	8.95118	3.20681	1.32316	0.460607	46.8201	78.7715	74.2571	30.3611	337.001	461.848	26.1357	467.588	179.821	34.3352	11.224	20.6592	218.423	111.042	20.1111	46.3723	6.46081	28.8309	7.22294	2.33612	7.38108	1.18475	7.13664	1.3968	3.65457	0.506987	3.0795	0.470755	449.938	2.35333	11.3109	34.864	4.79167	0.746115	0.776752	4.76032	25.1262	0.410158	470.892
32	49.7385	2.30851	15.9982	12.1286	0.19184	5.76669	9.03843	3.16104	1.23193	0.436229	49.0549	89.7073	92.4542	30.1627	331.484	437.871	24.8911	465.745	170.893	33.0325	10.6431	20.2184	200.868	108.211	19.0652	44.0397	6.13796	27.4922	6.89189	2.24961	7.05655	1.13414	6.82768	1.33684	3.50229	0.484824	2.95134	0.449663	426.962	2.20377	10.7833	33.4237	4.56371	0.708283	0.735055	4.46869	23.9248	0.402968	468.993
33	49.6729	2.45182	15.8326	12.4398	0.192435	5.53085	8.91935	3.21383	1.2917	0.454694	47.5853	81.9616	79.9121	30.8578	347.947	459.84	25.369	459.792	181.368	34.6641	11.1971	20.6216	213.351	112.583	19.8978	46.1022	6.44369	28.9086	7.27403	2.36226	7.44921	1.19581	7.20728	1.41118	3.69467	0.511753	3.10333	0.473465	448.195	2.27592	11.275	35.2214	4.84872	0.74088	0.744444	4.65	24.3905	0.381682	463.236
34	49.9957	2.46922	15.8568	12.4166	0.192881	5.16674	8.76826	3.27878	1.37282	0.482126	45.9047	72.8281	69.9225	30.3627	336.453	500.54	26.393	467.988	189.386	35.3995	11.6417	20.787	219.143	113.286	21.144	48.6312	6.76722	30.1074	7.50853	2.40917	7.63912	1.22283	7.36153	1.44266	3.771	0.523036	3.17785	0.485661	488.659	2.5031	11.7322	35.9658	5.02883	0.773818	0.822874	5.09943	25.3897	0.401949	471.229
35	49.7326	2.45729	15.7934	12.4695	0.190931	5.45643	8.93111	3.22231	1.28616	0.460279	47.0747	80.9396	89.1991	30.9451	343.525	469.958	24.1081	462.05	183.864	34.8865	11.1889	20.7209	218.185	112.981	20.0026	46.3811	6.49232	29.0933	7.32906	2.37827	7.49398	1.20363	7.25154	1.42233	3.70935	0.514456	3.1209	0.475636	458.36	2.29323	11.2726	35.4063	4.89796	0.743491	0.749414	4.73039	23.1731	0.360339	465.025
36	49.6601	2.47441	15.8478	12.4561	0.1958	5.45409	8.9391	3.21077	1.29132	0.470578	47.0727	80.5784	80.2068	30.8569	348.582	451.135	26.1034	463.605	182.072	35.0151	11.3333	20.6948	213.23	112.781	20.2581	46.9881	6.56338	29.4062	7.3773	2.38337	7.53947	1.20891	7.27972	1.42154	3.73288	0.516647	3.13478	0.477575	439.763	2.32473	11.4197	35.5472	4.87458	0.750226	0.770028	4.74703	25.1649	0.422319	466.861
37	49.767	2.42713	15.8885	12.3751	0.192892	5.4522	8.94438	3.19945	1.29	0.463435	47.1966	81.1759	86.6927	30.5542	335.994	467.643	24.3521	467.661	181.597	34.5166	11.1274	20.6105	213.169	111.532	20.1059	46.5064	6.48797	28.9998	7.27256	2.35385	7.43638	1.19138	7.16646	1.40302	3.66836	0.509062	3.08983	0.471453	455.992	2.33969	11.2512	35.0149	4.83395	0.741794	0.766246	4.7911	23.3527	0.363913	470.921
38	49.9887	2.40366	15.8615	12.2657	0.192659	5.4013	8.85404	3.23873	1.33221	0.461502	47.2262	80.4704	86.4214	30.2758	335.416	484.154	26.6669	467.56	183.522	34.3202	11.2194	20.5268	208.099	111.339	20.281	46.7372	6.50477	29.0539	7.25298	2.3492	7.39729	1.18445	7.13198	1.39534	3.65011	0.505553	3.07755	0.469158	472.961	2.36651	11.3452	34.8289	4.87499	0.744957	0.786517	4.84293	25.6434	0.432457	470.604
39	49.8004	2.44218	15.6847	12.4643	0.194986	5.52758	8.92415	3.21862	1.28277	0.460251	47.4571	81.8668	91.6901	30.9096	345.524	468.096	25.0252	462.929	183.445	34.7765	11.2416	20.557	217.753	112.716	20.1206	46.5671	6.51109	29.1545	7.30752	2.36315	7.47909	1.19859	7.22384	1.41548	3.69248	0.512273	3.1073	0.474261	456.442	2.30065	11.3096	35.2821	4.88535	0.741399	0.761066	4.77969	23.9889	0.386944	465.732
40	49.7267	2.48521	15.7736	12.536	0.197656	5.35248	8.88943	3.24093	1.32667	0.471261	46.661	76.7191	73.757	30.8947	350.628	463.992	25.8738	465.113	184.04	35.24	11.4508	20.7888	219.017	113.817	20.4956	47.4021	6.63015	29.6265	7.42321	2.39029	7.60103	1.21664	7.33265	1.43739	3.75304	0.521085	3.15717	0.48284	452.13	2.35531	11.4867	35.8335	4.91663	0.754582	0.773609	4.8614	24.9309	0.394966	468.252
41	49.8036	2.38856	15.9038	12.2969	0.191094	5.51162	8.93457	3.22608	1.29156	0.452141	47.6505	82.175	79.0338	30.4449	338.013	457.852	25.7545	463.9	178.203	34.201	11.0978	20.5321	212.844	110.882	19.8815	45.8318	6.39274	28.594	7.16302	2.31812	7.32423	1.1763	7.08184	1.38941	3.63172	0.503245	3.06177	0.466532	446.162	2.31069	11.1816	34.678	4.7576	0.733689	0.763415	4.68939	24.765	0.401028	467.064
42	49.6404	2.48441	15.7757	12.557	0.194379	5.45363	8.8947	3.2324	1.30091	0.466415	46.9688	79.017	72.6494	31.0185	350.342	463.295	25.4371	460.121	183.889	35.2048	11.434	20.7226	218.777	113.696	20.3443	47.0693	6.58441	29.4569	7.40344	2.38903	7.57579	1.21521	7.32834	1.43643	3.75576	0.520641	3.15296	0.481818	451.159	2.32484	11.4767	35.8006	4.91346	0.754875	0.761966	4.7763	24.4512	0.370222	463.153
43	49.7154	2.51353	15.8316	12.5547	0.19622	5.2605	8.88467	3.24563	1.31752	0.480233	46.0026	75.2283	64.7297	30.8515	348.461	464.732	26.6653	464.385	187.036	35.8357	11.6761	20.8363	224.258	114.113	20.8993	48.267	6.74105	30.1412	7.55237	2.42012	7.70753	1.23764	7.4431	1.45948	3.81747	0.529662	3.21653	0.49114	452.749	2.43778	11.7089	36.4169	4.9979	0.768034	0.802648	4.94465	25.7993	0.413696	467.648
44	49.9072	2.41586	15.9288	12.3188	0.190212	5.33608	8.85164	3.25449	1.32717	0.469759	46.5924	79.8456	74.4791	30.2765	330.128	481.297	26.4847	469.526	183.669	34.5951	11.4054	20.6201	213.87	111.377	20.5814	47.3153	6.58346	29.3571	7.33955	2.36295	7.46415	1.19679	7.19678	1.41107	3.69261	0.511637	3.10889	0.473898	469.777	2.40986	11.4849	35.1761	4.88229	0.755207	0.794483	4.88781	25.4652	0.419947	472.579
45	49.7682	2.4202	15.8596	12.363	0.192793	5.49424	8.98371	3.19705	1.2599	0.461226	47.3834	82.5595	90.857	30.5799	337.06	455.046	24.1176	466.841	180.417	34.5331	11.1179	20.5895	217.611	111.365	19.9784	46.27	6.46	28.9362	7.25964	2.34642	7.41691	1.19101	7.16044	1.40295	3.66695	0.508859	3.0881	0.470657	443.682	2.32577	11.2082	35.0165	4.8122	0.737003	0.764772	4.74629	23.1607	0.385036	470.241
46	49.7593	2.52443	15.7208	12.5876	0.196968	5.25263	8.90549	3.24687	1.32277	0.483204	46.0864	73.7457	79.1454	31.0928	350.923	470.751	25.1184	466.43	188.017	36.0057	11.5817	20.8722	226.833	114.648	20.8457	48.338	6.7636	30.2245	7.57279	2.42952	7.74246	1.23976	7.46253	1.46043	3.81825	0.530237	3.2201	0.491302	458.858	2.41688	11.5947	36.4827	5.01903	0.761715	0.794843	5.00697	24.1818	0.378506	469.377
47	49.8753	2.40958	15.8269	12.3089	0.189334	5.47992	8.93257	3.24564	1.27387	0.457945	47.5026	82.1012	89.6422	30.4912	336.645	463.759	24.7289	466.123	181.29	34.5845	11.1267	20.5811	213.187	111.502	20.0128	46.2711	6.46151	28.9591	7.26049	2.34588	7.41005	1.19023	7.15373	1.404	3.66778	0.508341	3.09672	0.47033	452.549	2.33325	11.1818	35.0437	4.83496	0.732232	0.769672	4.76937	23.8008	0.393315	469.13
48	49.8883	2.41165	15.9124	12.3106	0.19464	5.37437	8.9018	3.21911	1.32519	0.461992	46.9907	80.1047	81.258	30.3601	336.327	477.536	26.5267	469.3	182.879	34.4019	11.2554	20.5397	212.602	111.382	20.236	46.6547	6.50118	29.0133	7.25932	2.35089	7.40774	1.18753	7.15287	1.40019	3.66012	0.507653	3.08738	0.471949	466.304	2.35387	11.3383	34.9228	4.85715	0.745949	0.781574	4.82394	25.5666	0.423116	472.259
49	49.7336	2.39928	15.9214	12.3458	0.191837	5.52386	8.94383	3.2114	1.27452	0.45452	47.686	82.1589	81.5532	30.3825	336.466	461.515	24.0587	465.283	179.102	34.1427	11.0454	20.565	208.272	111.187	19.8341	45.8111	6.39854	28.579	7.17689	2.32614	7.34274	1.17825	7.09927	1.39364	3.63633	0.504464	3.06136	0.467723	449.703	2.30234	11.1395	34.7005	4.76898	0.735417	0.756139	4.70991	23.1143	0.347354	468.215
50	49.7751	2.47469	15.8197	12.444	0.192439	5.39367	8.9143	3.23057	1.28565	0.469986	47.0242	78.1922	84.8285	30.6219	342.596	468.416	23.8769	465.391	184.977	35.1588	11.3045	20.7297	214.781	113.007	20.363	47.2231	6.59653	29.5318	7.41082	2.38998	7.57367	1.21407	7.30348	1.42989	3.74146	0.518982	3.15077	0.480238	456.663	2.3807	11.3711	35.7055	4.93272	0.748393	0.778691	4.87679	22.9251	0.351119	468.647
SD
Repeat Number	SiO2	TiO2	Al2O3	FeO*	MnO	MgO	CaO	Na2O	K2O	P2O5	Mg#	Ni	Cr	Sc	V	Ba	Rb	Sr	Zr	Y	Nb	Ga	Cu	Zn	La ppm	Ce ppm	Pr ppm	Nd ppm	Sm ppm	Eu ppm	Gd ppm	Tb ppm	Dy ppm	Ho ppm	Er ppm	Tm ppm	Yb ppm	Lu ppm	Ba ppm	Th ppm	Nb ppm	Y ppm	Hf ppm	Ta ppm	U ppm	Pb ppm	Rb ppm	Cs ppm	Sr ppm
1	1.22396	0.455825	0.738761	1.00877	0.0203165	1.46701	0.689322	0.30337	0.357901	0.128116	7.53822	39.9809	69.0229	2.74026	52.4006	143.123	10.9988	33.0666	42.0306	6.40316	2.47913	1.70066	54.9571	13.7403	5.2016	11.6202	1.58571	6.77656	1.5711	0.397819	1.50083	0.233446	1.39169	0.271616	0.71289	0.099043	0.590644	0.089311	143.785	0.813282	2.40633	6.71499	1.09633	0.15801	0.282296	1.57499	11.054	0.334017	34.0757
2	1.15483	0.476999	0.668319	0.997191	0.0251409	1.41591	0.684155	0.301459	0.333521	0.127346	7.61179	38.4193	64.4689	2.73017	54.0992	130.645	10.5224	28.7992	41.0304	6.51616	2.37442	1.70554	57.0212	13.6947	5.09172	11.4663	1.56636	6.75074	1.57315	0.40738	1.51962	0.235796	1.39737	0.268604	0.715009	0.0989261	0.597981	0.0899847	130.871	0.797236	2.38365	6.73296	1.0852	0.155486	0.276776	1.5227	10.6521	0.313704	29.5082
3	1.26342	0.522138	0.771695	1.02232	0.0260977	1.68807	0.750897	0.349836	0.376601	0.148282	8.69785	45.3312	71.1221	2.50653	54.7129	152	9.78663	31.3741	48.3562	7.16004	2.66265	1.85396	60.6538	15.1035	5.83553	13.2367	1.81274	7.77684	1.80578	0.461257	1.73706	0.265339	1.56349	0.30169	0.790521	0.111072	0.666469	0.101161	151.988	0.905921	2.61217	7.50846	1.25849	0.173095	0.301081	1.81469	9.84701	0.290371	31.6562
4	1.09175	0.500591	0.745235	1.02964	0.0223207	1.48332	0.704981	0.306612	0.361243	0.132278	7.9153	41.7471	69.5804	2.54707	54.3211	136.659	10.3767	29.7421	43.7452	6.8473	2.48778	1.79838	57.3935	14.8492	5.29139	11.9977	1.64807	7.10607	1.66031	0.432361	1.61048	0.247998	1.47887	0.284656	0.75369	0.104154	0.624373	0.0939526	136.267	0.793403	2.50859	7.10338	1.15988	0.165665	0.265914	1.56208	10.4519	0.296435	30.1825
5	1.12608	0.467984	0.68552	0.991043	0.022609	1.46189	0.649476	0.288912	0.335762	0.128587	7.87766	38.2701	63.5944	2.71665	54.9751	132.385	10.254	31.1255	40.6553	6.40698	2.3716	1.74856	57.4158	13.5677	5.0494	11.3755	1.5566	6.68511	1.57074	0.405664	1.50579	0.234155	1.38667	0.268368	0.710451	0.0985799	0.589028	0.0884582	132.594	0.786088	2.34588	6.6699	1.06923	0.155266	0.266526	1.51753	10.3724	0.313519	31.4453
6	1.02984	0.448042	0.711886	0.984946	0.0214762	1.31527	0.60086	0.272582	0.285848	0.123044	7.20381	34.9605	57.43	2.46986	52.8456	124.803	8.90032	29.4346	39.19	5.95799	2.2926	1.6327	56.0831	13.2373	4.76306	10.7948	1.48601	6.40824	1.5019	0.384563	1.44506	0.222511	1.32432	0.256573	0.674139	0.0935622	0.551907	0.0832815	125.292	0.716858	2.25076	6.317	1.02558	0.147762	0.246538	1.40822	9.00701	0.269535	30.1716
7	1.04398	0.485872	0.677223	0.959098	0.0234852	1.53998	0.679067	0.312486	0.346192	0.132649	8.26472	40.8604	70.7562	2.53817	55.1818	135.641	10.2558	29.3668	42.8009	6.66236	2.50788	1.79152	58.0326	13.9544	5.27324	11.8761	1.62592	6.96983	1.63616	0.422456	1.57211	0.243447	1.44423	0.277848	0.739329	0.102384	0.619603	0.0933412	135.295	0.808157	2.47175	6.94171	1.12504	0.163823	0.271574	1.56614	10.4046	0.295082	29.8309
8	1.10913	0.47187	0.722771	0.989706	0.0209622	1.46023	0.668185	0.293502	0.337255	0.132138	7.78762	39.3534	62.9503	2.63808	53.7633	130.61	9.85109	30.2634	42.5353	6.53989	2.44985	1.66398	56.2003	13.8672	5.27724	11.8924	1.6237	6.96254	1.62124	0.4169	1.55231	0.238815	1.41529	0.272883	0.723727	0.10038	0.600246	0.0904308	130.436	0.816381	2.43393	6.80221	1.1183	0.160586	0.27585	1.59094	9.92201	0.293866	30.6114
9	1.26824	0.471024	0.667366	1.04635	0.0277795	1.38737	0.717204	0.300528	0.349256	0.126939	7.2008	38.8716	66.5756	2.64734	53.0632	141.117	10.7757	31.5593	41.1159	6.32274	2.36958	1.54447	57.0089	13.3159	5.14481	11.4948	1.56293	6.68187	1.54095	0.390942	1.50386	0.231735	1.37322	0.264745	0.696983	0.0978802	0.584744	0.0904609	141.543	0.814886	2.37379	6.60817	1.07085	0.154869	0.284357	1.55848	10.7705	0.315935	32.4976
10	1.01315	0.496568	0.758855	0.965931	0.0185369	1.56211	0.718292	0.318264	0.356845	0.137828	8.30098	43.9318	76.3426	2.34158	52.4955	149.496	9.27785	26.9056	46.1361	6.96699	2.62141	1.85711	56.1604	14.8893	5.51847	12.4977	1.71672	7.36739	1.71707	0.442581	1.6495	0.253129	1.50777	0.290662	0.76994	0.10653	0.641132	0.0965682	148.98	0.828038	2.59357	7.25335	1.20994	0.172451	0.271362	1.63545	9.40952	0.252849	27.2786
11	1.0668	0.51151	0.717558	1.00203	0.0237734	1.57502	0.722723	0.325693	0.376589	0.135608	8.29206	43.595	77.209	2.43938	52.8539	145.009	10.2972	27.6548	45.1347	6.9976	2.58827	1.81595	58.3401	14.8347	5.43592	12.314	1.69353	7.27723	1.70785	0.44313	1.659	0.254551	1.51261	0.290923	0.77201	0.107359	0.647851	0.0982646	144.544	0.808547	2.54379	7.28537	1.18776	0.168199	0.266152	1.60936	10.3755	0.282087	28.171
12	1.02987	0.470899	0.638539	0.915639	0.019123	1.55316	0.717624	0.294362	0.365613	0.135062	8.18062	42.3264	76.3221	2.42643	51.7296	137.36	10.5927	29.5329	44.1877	6.54113	2.61027	1.66915	53.1385	13.6702	5.60154	12.4333	1.67956	7.1284	1.64525	0.422634	1.5623	0.240701	1.42983	0.274693	0.735608	0.101201	0.612985	0.0931976	136.492	0.879628	2.63555	6.85426	1.15678	0.175414	0.296166	1.65161	10.7079	0.283562	30.2112
13	1.16186	0.500571	0.792612	1.02462	0.0238641	1.56515	0.706619	0.339244	0.34932	0.137613	8.20677	42.8466	65.7994	2.63774	54.932	134.057	9.91585	30.9716	45.9235	7.00823	2.57949	1.79195	56.8466	15.0185	5.53175	12.5241	1.72078	7.40897	1.72355	0.442275	1.65776	0.255433	1.51525	0.293942	0.767007	0.107015	0.646866	0.0973665	133.839	0.85417	2.5337	7.29237	1.20779	0.166351	0.290227	1.69862	10.0682	0.297642	31.6238
14	1.20798	0.502181	0.749979	1.04473	0.0246138	1.50144	0.665327	0.319714	0.354903	0.13356	8.08785	40.4575	58.8544	2.69351	53.0264	136.596	10.466	29.452	44.007	6.90488	2.41487	1.7982	60.468	14.5491	5.23846	11.9289	1.64388	7.12939	1.6754	0.433744	1.62824	0.251028	1.47988	0.28617	0.748435	0.104716	0.631294	0.0938777	136.562	0.792753	2.39015	7.13462	1.15772	0.155258	0.268668	1.60313	10.459	0.320402	29.9363
15	1.14443	0.515285	0.727071	1.04135	0.0286571	1.56603	0.691885	0.332184	0.350193	0.137675	8.4513	42.357	64.7449	2.5744	55.2286	135.942	9.93071	29.1231	45.2188	7.05075	2.48643	1.85664	58.8996	14.9269	5.36549	12.2487	1.68983	7.30918	1.71566	0.446827	1.66535	0.257139	1.52009	0.293048	0.765997	0.10722	0.647738	0.097706	135.704	0.816237	2.48434	7.29378	1.19081	0.16366	0.273588	1.63201	10.0748	0.291512	29.4049
16	1.20751	0.494897	0.812856	1.04078	0.024885	1.45507	0.729868	0.326048	0.329534	0.139972	7.57743	42.2201	63.4455	2.50058	55.1986	143.953	8.87936	30.6293	45.4759	6.93401	2.50128	1.70915	55.6859	14.8923	5.48762	12.5148	1.72074	7.39816	1.70093	0.431943	1.64581	0.250918	1.49226	0.287133	0.754931	0.105334	0.629094	0.0955179	144.208	0.842893	2.49332	7.17884	1.19226	0.163686	0.286867	1.69075	8.94198	0.265484	31.2829
17	1.13501	0.46739	0.667914	1.00989	0.0267917	1.40646	0.69003	0.299018	0.340179	0.12634	7.50734	39.3662	66.5604	2.61449	51.3488	128.322	10.4859	28.9256	41.9662	6.45191	2.43118	1.55108	53.7815	13.5175	5.22145	11.6611	1.5868	6.79116	1.56897	0.402704	1.51845	0.234748	1.39295	0.268749	0.70634	0.0986805	0.596277	0.0916337	128.045	0.819643	2.44579	6.69461	1.10072	0.159641	0.284054	1.56551	10.5726	0.295318	29.8192
18	1.07432	0.462522	0.746523	0.988427	0.0236949	1.38019	0.654934	0.306021	0.312233	0.128153	7.30068	38.6071	62.2692	2.51045	49.9225	126.987	9.03514	27.2007	42.37	6.44551	2.46088	1.51471	55.0733	13.6067	5.15446	11.6668	1.60178	6.87786	1.59595	0.405518	1.5394	0.235502	1.39991	0.269374	0.710062	0.099326	0.594613	0.0908592	126.915	0.779933	2.37487	6.72277	1.10823	0.154239	0.26792	1.55806	9.05087	0.254886	28.3266
19	1.06656	0.48491	0.663957	1.02015	0.0270886	1.41836	0.633972	0.294968	0.3308	0.12435	7.81727	37.5797	63.5754	2.54502	52.7845	130.444	10.188	28.8248	40.7903	6.37357	2.39316	1.68925	61.7948	13.5371	4.88322	11.0771	1.52479	6.59634	1.56439	0.406381	1.52573	0.236334	1.40211	0.268996	0.709674	0.0993676	0.591773	0.0902467	130.374	0.72378	2.33744	6.6935	1.06954	0.152842	0.245169	1.43093	10.1987	0.292991	29.5339
20	1.1286	0.489141	0.739999	1.03821	0.0264683	1.45366	0.675385	0.312026	0.319625	0.131334	7.88078	39.8904	63.0821	2.56877	55.4622	136.117	9.21649	30.476	42.713	6.63057	2.404	1.79113	59.9594	14.3266	5.15079	11.6919	1.6095	6.95172	1.62217	0.416096	1.57723	0.243138	1.44028	0.278975	0.727461	0.101871	0.609785	0.0923154	136.273	0.794223	2.39827	6.9201	1.12166	0.157521	0.269144	1.55889	9.39025	0.282954	30.908
21	0.996091	0.471566	0.61416	0.956443	0.0247995	1.5351	0.688083	0.291034	0.353458	0.13405	8.27162	41.6124	74.098	2.41438	53.3435	138.777	9.77174	29.6204	42.9778	6.49888	2.53131	1.61072	55.1309	13.2193	5.46187	12.1366	1.64476	6.94603	1.61615	0.412931	1.55357	0.238852	1.41439	0.271467	0.722574	0.100837	0.608472	0.0939506	137.622	0.852929	2.54285	6.78165	1.1149	0.170716	0.282478	1.61758	9.83528	0.257109	29.9331
22	1.04121	0.46845	0.636023	0.959637	0.0236191	1.53647	0.692345	0.300254	0.36712	0.126689	8.0558	40.6442	76.5007	2.4898	52.1753	133.316	11.0986	31.7074	42.1214	6.25704	2.62565	1.6314	57.4047	13.3596	5.25034	11.6673	1.58456	6.73186	1.57925	0.406903	1.50472	0.2346	1.40615	0.270331	0.719518	0.0998163	0.593602	0.0922262	132.975	0.800471	2.54257	6.68137	1.09945	0.16931	0.271346	1.52238	11.1558	0.300371	32.7957
23	0.961399	0.445522	0.675395	1.03705	0.0232819	1.27469	0.656487	0.255633	0.32075	0.119501	6.87163	37.4908	67.736	2.48448	52.6961	126.03	8.57649	30.9032	38.6455	6.00465	2.32712	1.38031	53.9824	13.0817	4.94094	10.9967	1.49859	6.33407	1.47204	0.374053	1.44243	0.21948	1.31481	0.254147	0.67059	0.0939524	0.551741	0.086797	125.083	0.753025	2.33936	6.30628	1.00986	0.156567	0.249969	1.43775	8.54005	0.230074	31.1891
24	1.14506	0.49125	0.652333	1.06669	0.0292518	1.47022	0.700271	0.303427	0.372597	0.122566	7.8474	40.3865	73.1106	2.61291	54.5945	136.974	11.4697	32.7383	41.0039	6.48182	2.44028	1.71713	57.9988	13.9948	4.97959	11.1654	1.53162	6.56623	1.55075	0.40479	1.52059	0.237739	1.42332	0.274677	0.720475	0.100757	0.600985	0.0931998	136.839	0.751603	2.42523	6.79791	1.07778	0.160789	0.256851	1.45118	11.5186	0.318672	33.5705
25	1.1086	0.51559	0.770242	1.02739	0.0212618	1.60924	0.732465	0.328703	0.38303	0.139854	8.45146	45.1653	75.5135	2.47793	54.8867	145.807	10.2603	31.2821	46.7599	7.16012	2.62128	1.8399	58.7495	15.2709	5.69002	12.8126	1.7552	7.52074	1.75062	0.449439	1.6991	0.260107	1.54321	0.298651	0.784395	0.109248	0.660586	0.0996057	144.832	0.866694	2.62675	7.44661	1.22815	0.174199	0.285825	1.71421	10.3084	0.287269	31.6052
26	1.15501	0.49416	0.766034	0.998176	0.0225366	1.57453	0.691973	0.329801	0.360391	0.136647	8.35457	42.895	68.0316	2.56685	52.4511	141.886	10.5518	30.3524	45.954	6.97505	2.60418	1.81015	57.8821	14.6126	5.50467	12.4264	1.70453	7.33463	1.70912	0.437733	1.6408	0.253928	1.50581	0.291219	0.762406	0.106323	0.643284	0.0965558	141.61	0.840573	2.54882	7.2426	1.20201	0.166767	0.28539	1.67266	10.5931	0.304747	31.2534
27	1.17454	0.4806	0.756514	1.04101	0.0212876	1.42558	0.690211	0.294844	0.360871	0.130374	7.54344	40.5921	65.6122	2.65367	52.3999	142.145	10.3518	30.4216	42.8558	6.70365	2.40766	1.68523	56.7432	14.2449	5.25155	11.8398	1.62093	6.96415	1.61693	0.414514	1.57266	0.241044	1.43058	0.276528	0.729186	0.101518	0.607411	0.0913767	141.938	0.801703	2.41789	6.91799	1.12621	0.158335	0.270836	1.58283	10.3109	0.30668	30.8655
28	1.12632	0.516958	0.768388	1.02509	0.0246181	1.59012	0.662537	0.335306	0.341956	0.13853	8.60255	41.526	58.6614	2.60378	56.5637	132.207	9.82267	30.1087	45.3272	7.0468	2.48298	1.95903	61.1635	15.2593	5.29522	12.1719	1.68711	7.34275	1.73606	0.453892	1.67255	0.258834	1.53022	0.296144	0.773005	0.107553	0.647631	0.095762	132.212	0.792785	2.448	7.3315	1.19862	0.161174	0.264409	1.61495	10.0026	0.306475	30.2788
29	1.13933	0.484862	0.714171	0.991099	0.0212894	1.55756	0.699534	0.314174	0.360394	0.131632	8.15394	41.3817	71.9518	2.65927	54.2789	136.958	10.6254	30.8021	43.346	6.6175	2.54984	1.82672	58.2425	14.3744	5.31212	11.9391	1.63308	7.01442	1.64201	0.424799	1.56885	0.24378	1.45052	0.281674	0.742699	0.102836	0.616171	0.0929583	137.173	0.823274	2.49572	6.96627	1.14167	0.165246	0.278956	1.58983	10.8156	0.317861	31.3856
30	1.06384	0.474742	0.693763	1.01165	0.0253641	1.47016	0.693355	0.297907	0.346074	0.131013	7.8013	41.0502	71.1901	2.46554	52.6534	137.266	9.44714	30.2	42.7946	6.48818	2.49542	1.596	55.9549	13.7382	5.31189	11.907	1.62502	6.91144	1.60675	0.410326	1.55599	0.238424	1.41823	0.273343	0.720216	0.10094	0.601709	0.0932522	136.649	0.81687	2.47617	6.79739	1.11484	0.164907	0.272334	1.58648	9.48047	0.25779	30.6579
31	1.21713	0.485123	0.720511	1.03903	0.0269897	1.5161	0.669935	0.317967	0.352725	0.132961	8.05203	39.7409	59.4144	2.6017	54.6916	132.326	10.731	33.761	43.1648	6.56324	2.44693	1.72003	57.6621	14.0913	5.19051	11.7635	1.61635	6.94576	1.63211	0.4213	1.56852	0.243509	1.44607	0.279762	0.728762	0.102057	0.607001	0.0921544	132.499	0.789344	2.39738	6.88733	1.12754	0.158709	0.269383	1.5893	10.7318	0.318703	34.3631
32	1.31495	0.469497	0.703387	0.934971	0.0241878	1.5998	0.779585	0.329856	0.39174	0.139838	7.90251	43.9587	75.1476	2.53902	48.0296	148.238	11.2139	30.1603	46.1387	6.6519	2.63767	1.60882	51.1593	13.7682	5.78301	12.8978	1.74109	7.40785	1.68243	0.427495	1.59358	0.244413	1.44487	0.278001	0.737261	0.102644	0.619227	0.0950381	148.592	0.926139	2.62082	6.94966	1.201	0.172121	0.317843	1.78605	11.2652	0.318109	31.1093
33	1.12481	0.490078	0.731513	1.02023	0.0245776	1.40805	0.680738	0.308888	0.327589	0.127898	7.50391	38.9975	64.8587	2.53551	53.4896	133.557	9.9325	28.3126	42.2177	6.54481	2.40097	1.75957	58.1737	14.3918	5.02973	11.4608	1.58065	6.85945	1.60411	0.415894	1.56007	0.240213	1.42991	0.275564	0.726751	0.100707	0.602949	0.0907486	133.939	0.755987	2.38212	6.85559	1.11567	0.155135	0.260011	1.49404	10.0541	0.293899	29.2774
34	1.13844	0.444012	0.713777	0.999048	0.0222075	1.37444	0.604336	0.279189	0.307486	0.127066	7.43739	35.5545	55.3279	2.61542	55.0192	128.388	9.97886	34.2269	39.2119	6.07425	2.29037	1.62353	55.9027	12.9214	4.87767	10.9921	1.50643	6.44575	1.51316	0.382429	1.44673	0.224712	1.33253	0.258741	0.679683	0.0946979	0.560336	0.0842151	128.882	0.754236	2.23483	6.38089	1.01925	0.147926	0.260912	1.47773	9.97243	0.309041	34.8181
35	0.994137	0.466178	0.643416	0.966882	0.0238071	1.47357	0.660033	0.286315	0.334242	0.127516	7.99105	39.1593	72.2347	2.40871	54.3253	140.43	9.83716	30.9559	40.7717	6.21748	2.48589	1.72258	58.6479	13.2212	5.04685	11.3105	1.5464	6.58922	1.55202	0.397347	1.49208	0.23154	1.38208	0.265772	0.70722	0.0982715	0.58307	0.0896547	140.27	0.762399	2.42797	6.59238	1.06043	0.162322	0.254495	1.46033	9.92152	0.272802	31.5758
36	1.1924	0.493158	0.668569	1.01744	0.0275614	1.51536	0.729775	0.317934	0.361277	0.132447	7.89428	40.9526	70.25	2.64666	53.9472	134.355	10.5508	29.7774	43.0096	6.63089	2.48819	1.69484	57.2367	14.1481	5.31169	11.9756	1.63562	7.01555	1.63573	0.425401	1.57791	0.243548	1.44543	0.277893	0.737084	0.102635	0.614608	0.0943301	134.586	0.82644	2.47272	6.92886	1.13341	0.163459	0.280988	1.59881	10.679	0.305037	30.2842
37	1.14739	0.462279	0.66034	0.963117	0.0252732	1.52189	0.691223	0.304136	0.345693	0.13406	7.93174	39.9332	69.5824	2.44404	53.1531	141.764	10.052	32.0944	42.4186	6.23766	2.50365	1.61832	55.4389	13.1108	5.29295	11.8501	1.61368	6.83987	1.59387	0.404472	1.51928	0.234065	1.38965	0.267607	0.70898	0.0990544	0.588354	0.0908448	141.909	0.821542	2.43468	6.62354	1.09434	0.162905	0.278358	1.59715	10.0693	0.282762	32.7946
38	1.23025	0.456789	0.63456	0.993497	0.0243971	1.48391	0.69296	0.28974	0.371396	0.127054	7.70422	39.0873	70.4194	2.65586	51.945	145.325	11.422	33.1619	40.5492	6.14252	2.4046	1.66319	56.1375	12.955	5.1095	11.3449	1.53894	6.54357	1.52683	0.389901	1.46478	0.22795	1.35092	0.262203	0.692362	0.0965984	0.574166	0.0879074	145.797	0.806266	2.36934	6.48646	1.05095	0.157172	0.276422	1.53346	11.4308	0.336628	33.8866
39	1.17088	0.460873	0.645824	1.02637	0.0252666	1.46971	0.728344	0.29866	0.367329	0.125774	7.56587	41.1303	77.2208	2.63731	52.7989	146.996	10.6378	32.7037	41.3308	6.29118	2.52006	1.59378	56.163	13.3475	5.24918	11.6049	1.57462	6.65308	1.54117	0.38895	1.49106	0.230906	1.37937	0.268061	0.705698	0.0990347	0.588003	0.0922286	147.092	0.827451	2.46534	6.64443	1.07183	0.164019	0.281576	1.56068	10.699	0.301689	33.4957
40	1.14105	0.479398	0.730678	1.07371	0.0251798	1.31922	0.657849	0.294435	0.33268	0.120994	7.07543	36.8558	59.7114	2.69767	54.4375	122.912	10.3628	32.075	39.7678	6.36934	2.32369	1.5577	59.6473	13.8499	4.85732	10.9911	1.51144	6.52542	1.53513	0.396252	1.50679	0.232347	1.38646	0.267045	0.703743	0.0981893	0.582378	0.0888185	122.859	0.727545	2.29602	6.64891	1.05232	0.149764	0.251457	1.44114	10.3182	0.307268	32.8422
41	1.2315	0.475717	0.759585	1.00092	0.0212681	1.52666	0.714448	0.322991	0.36365	0.133335	7.83097	41.7189	68.0623	2.69101	51.0001	137.617	10.7637	30.9891	44.7959	6.68475	2.58023	1.68662	56.0317	14.2733	5.50109	12.3227	1.67887	7.20365	1.66199	0.423197	1.58715	0.244951	1.45267	0.28245	0.73961	0.103016	0.619693	0.0936513	137.832	0.862042	2.52488	7.00046	1.17335	0.164528	0.297088	1.68304	10.8376	0.321459	31.9572
42	1.13034	0.492564	0.788286	1.03967	0.0236808	1.43557	0.684244	0.31745	0.325772	0.13239	7.62177	40.2498	61.9062	2.5708	55.0705	132.788	9.2734	30.5312	43.4381	6.7401	2.44799	1.73529	58.9618	14.6781	5.2208	11.8968	1.64012	7.08679	1.65088	0.423213	1.6027	0.245712	1.46146	0.282222	0.740581	0.10318	0.616428	0.0929326	132.861	0.79052	2.41694	7.02449	1.14562	0.158251	0.26859	1.58263	9.36211	0.281419	31.1342
43	1.21	0.488737	0.755382	1.01186	0.0253714	1.48026	0.705032	0.33227	0.322743	0.134107	7.81003	40.3788	59.8872	2.74114	54.4151	129.524	9.62794	29.4678	44.4483	6.77593	2.50027	1.71736	59.0769	14.3854	5.41606	12.24	1.67335	7.22932	1.66968	0.427129	1.60525	0.247272	1.46092	0.282193	0.739862	0.103279	0.625113	0.0941454	129.835	0.858477	2.47205	7.03862	1.17025	0.160041	0.297938	1.6728	9.82408	0.303827	30.2603
44	1.2817	0.481928	0.746736	0.95181	0.018337	1.65577	0.730487	0.328566	0.376025	0.146204	8.50347	44.2111	68.6557	2.58522	52.5436	150.684	10.7583	33.1571	47.2469	6.9267	2.61131	1.814	54.742	14.3038	5.87016	13.1308	1.78205	7.59548	1.74568	0.440459	1.6513	0.254133	1.49407	0.290634	0.763189	0.106047	0.644354	0.0958528	150.647	0.942417	2.60634	7.21783	1.22613	0.172488	0.320669	1.83216	10.83	0.324686	33.7266
45	1.14496	0.4594	0.62704	0.944559	0.0254171	1.5528	0.734456	0.307223	0.357444	0.134507	8.02827	42.0964	76.3909	2.48165	51.7483	143.392	10.4082	31.0799	43.8096	6.36972	2.60798	1.5912	52.8817	13.1586	5.57185	12.3219	1.66296	7.0177	1.61117	0.407223	1.53043	0.236503	1.40379	0.27099	0.71739	0.100114	0.602937	0.093889	143.196	0.892901	2.5852	6.72476	1.13235	0.172096	0.304913	1.6767	10.5389	0.284686	31.9542
46	1.0255	0.439412	0.613838	1.02441	0.0284217	1.29703	0.629885	0.277774	0.311718	0.113583	7.09656	34.3943	65.4208	2.69247	53.1362	121.118	9.59828	30.1235	35.9318	5.79776	2.29224	1.41171	56.5678	12.231	4.58144	10.2147	1.39842	5.93582	1.4115	0.362359	1.37483	0.21394	1.2785	0.246746	0.653484	0.0920828	0.540711	0.0854605	121.168	0.696066	2.19329	6.11595	0.937585	0.145854	0.237287	1.3228	9.65212	0.276541	30.6762
47	1.10544	0.449058	0.626642	0.936645	0.0209283	1.485	0.704921	0.290381	0.35434	0.127805	7.76417	40.5054	75.4438	2.62454	48.496	140.879	10.5368	28.0581	42.4114	6.29192	2.55127	1.58164	54.7072	12.9242	5.4206	11.9339	1.60838	6.82347	1.56929	0.396692	1.4964	0.231238	1.36653	0.265284	0.703181	0.0979724	0.593066	0.0910796	140.681	0.869671	2.52065	6.61055	1.10132	0.165192	0.297878	1.61416	10.6698	0.298999	28.9885
48	1.24877	0.478373	0.67623	1.02498	0.0267117	1.50433	0.696306	0.30579	0.364534	0.132263	7.94315	40.0282	66.3145	2.64589	53.6886	145.049	10.9739	32.6567	42.2296	6.4942	2.42373	1.70643	58.5715	13.5141	5.21512	11.7126	1.59806	6.83345	1.5967	0.408645	1.54093	0.23893	1.41304	0.27277	0.718089	0.100664	0.600144	0.0915569	145.346	0.812493	2.39561	6.7819	1.09781	0.158379	0.2768	1.58423	10.9513	0.325997	33.2449
49	1.1106	0.47507	0.742784	1.00404	0.0227117	1.4421	0.66886	0.296884	0.328704	0.134072	7.68915	39.6141	62.1344	2.38588	53.2232	136.62	9.2471	31.6293	43.3062	6.44237	2.46148	1.62997	57.942	13.8193	5.29625	11.9648	1.63579	7.00466	1.62561	0.412555	1.56739	0.239231	1.4197	0.273011	0.719111	0.100429	0.595273	0.0906217	136.339	0.806656	2.44301	6.78121	1.1269	0.161375	0.27145	1.59994	9.18911	0.26494	32.2068
50	0.984304	0.443495	0.610882	0.979176	0.0264301	1.29991	0.630362	0.265711	0.290991	0.12082	7.17172	35.1849	64.3486	2.41951	52.5224	127.103	8.68334	28.4106	37.9508	5.80488	2.28925	1.48059	56.1379	12.3986	4.79102	10.7135	1.46213	6.226	1.45537	0.370788	1.41411	0.216952	1.28894	0.247715	0.656991	0.0919311	0.544567	0.0848232	126.981	0.736033	2.27317	6.14912	0.98508	0.150516	0.250794	1.39255	8.7745	0.241108	29.0238
[truncated: 3 more columns]

## Sheet: Lower B Bootstrap
100 iterations
Average
Repeat Number	SiO2	TiO2	Al2O3	FeO*	MnO	MgO	CaO	Na2O	K2O	P2O5	Mg#	Ni	Cr	Sc	V	Ba	Rb	Sr	Zr	Y	Nb	Ga	Cu	Zn	La ppm	Ce ppm	Pr ppm	Nd ppm	Sm ppm	Eu ppm	Gd ppm	Tb ppm	Dy ppm	Ho ppm	Er ppm	Tm ppm	Yb ppm	Lu ppm	Ba ppm	Th ppm	Nb ppm	Y ppm	Hf ppm	Ta ppm	U ppm	Pb ppm	Rb ppm	Cs ppm	Sr ppm
l_1	49.2448	2.06092	15.9659	11.2964	0.177373	7.32829	10.096	2.89168	0.671417	0.267194	57.0926	150.783	297.374	29.6079	325.859	228.559	10.6977	391.863	140.98	27.476	9.21124	20.1145	166.514	96.9758	12.6703	30.3067	4.38342	20.1594	5.39737	1.86183	5.76218	0.950142	5.6879	1.11292	2.85946	0.394938	2.33472	0.355777	219.948	1.32616	8.51343	27.3629	3.68756	0.578849	0.371146	2.44632	10.2837	0.359933	397.681
l_2	49.2793	2.09931	15.7525	11.3774	0.178841	7.34629	10.1252	2.87569	0.693285	0.272089	56.9616	149.447	300.941	30.0959	328.471	229.597	11.3612	386.434	143.981	27.8049	9.53203	20.0988	167.529	97.9792	12.9512	30.8842	4.46043	20.5164	5.47651	1.8856	5.85603	0.963566	5.76131	1.13043	2.90383	0.400508	2.36576	0.359625	221.083	1.36331	8.77222	27.7202	3.76132	0.593089	0.390912	2.48495	10.9131	0.630769	391.75
l_3	49.3073	2.06359	15.7532	11.3031	0.178203	7.429	10.1605	2.86082	0.67974	0.264618	57.3648	155.157	310.947	30.0028	326.106	223.98	11.1944	379.601	143.273	27.774	9.55898	20.0071	158.624	96.7518	12.7657	30.3314	4.38277	20.1102	5.40363	1.85757	5.78624	0.95667	5.71991	1.1216	2.8861	0.398651	2.35273	0.35882	215.677	1.37897	8.63814	27.5955	3.71823	0.586197	0.393052	2.46339	10.6412	0.283171	384.397
l_4	49.1394	2.03138	15.7907	11.3103	0.177566	7.68045	10.1592	2.79684	0.655825	0.258356	58.2301	163.88	338.98	29.8974	324.203	221.579	10.424	380.087	137.764	26.9161	8.97579	19.7836	159.52	96.2022	12.3342	29.5049	4.26353	19.6569	5.27484	1.82656	5.65888	0.9316	5.58619	1.09455	2.80988	0.388	2.29132	0.348135	213.123	1.30006	8.3236	26.8851	3.61836	0.5609	0.354603	2.38402	9.97045	0.292787	384.75
l_5	49.2175	2.11334	15.6101	11.4568	0.180435	7.47895	10.1143	2.84949	0.707946	0.271007	57.2166	151.173	321.148	30.3219	333.246	227.682	11.5649	378.386	143.695	28.0168	9.61326	20.0503	164.587	98.4503	13.0169	31.0455	4.48096	20.6164	5.49697	1.88986	5.88642	0.970099	5.80883	1.13942	2.91964	0.403227	2.38282	0.362811	218.557	1.39392	8.7903	27.9713	3.77274	0.593098	0.397066	2.51151	11.1032	0.534807	384.503
l_6	49.1525	2.13257	15.7194	11.5181	0.179963	7.37626	10.08	2.86236	0.701419	0.277433	56.7432	146.869	300.533	30.2169	333.147	233.812	11.2174	387.816	144.876	27.9547	9.54606	20.1388	171.265	98.757	13.094	31.321	4.51417	20.7751	5.5378	1.90548	5.92043	0.972507	5.81734	1.14056	2.93169	0.403423	2.38761	0.362155	225.353	1.35901	8.84714	27.9757	3.79229	0.597626	0.383692	2.50011	10.7996	0.655855	393.907
l_7	49.1896	2.04517	15.7367	11.3723	0.178745	7.64393	10.0641	2.8194	0.685686	0.26443	57.9578	159.867	331.116	29.72	323.611	223.349	11.0712	380.421	139.331	27.1246	9.1393	19.8986	159.234	96.7899	12.6335	30.1484	4.35344	20.028	5.35182	1.84776	5.7205	0.943509	5.64263	1.10535	2.83714	0.391881	2.31256	0.352578	214.852	1.34388	8.4617	27.1574	3.66026	0.570568	0.376013	2.44324	10.706	0.366283	386.439
l_8	49.1872	2.11664	15.8194	11.4262	0.18008	7.36817	10.0735	2.85829	0.698187	0.272303	56.9093	150.693	317.577	29.9018	328.895	228.763	10.8043	384.219	144.869	27.9339	9.70576	20.0486	167.861	98.031	13.0822	31.2458	4.5051	20.6497	5.53638	1.89476	5.88022	0.969768	5.79948	1.13932	2.9163	0.40244	2.38143	0.363953	219.874	1.4073	8.84457	27.9322	3.78971	0.59462	0.381971	2.53757	10.4138	0.302752	390.192
l_9	49.2923	2.08449	15.954	11.2872	0.177703	7.2613	10.0719	2.88665	0.710768	0.273629	56.8398	148.848	284.713	29.3994	324.612	231.923	11.7834	392.423	142.259	27.5436	9.27496	20.2554	162.618	97.4915	13.0031	30.9865	4.46596	20.5216	5.47158	1.88446	5.83188	0.959531	5.73241	1.12366	2.89191	0.399	2.34901	0.358668	222.999	1.38272	8.72187	27.5977	3.73407	0.586777	0.395457	2.51473	11.3126	0.557181	397.915
l_10	49.2409	2.05897	15.9854	11.2792	0.175919	7.34425	10.0977	2.87609	0.675707	0.26581	57.1383	152.9	300.904	29.3285	323.104	224.174	10.8705	389.841	140.905	27.2792	9.33572	20.1198	166.486	96.7295	12.7161	30.2815	4.37788	20.1095	5.38007	1.85586	5.74098	0.945023	5.65795	1.10901	2.84781	0.393187	2.3202	0.355061	215.666	1.35323	8.58883	27.2331	3.68856	0.582082	0.382148	2.45824	10.5188	0.460335	395.656
l_11	49.3303	2.11329	15.9037	11.3056	0.177273	7.1895	10.1226	2.89363	0.693444	0.270567	56.5638	144.755	285.933	29.7069	329.784	227.378	11.2743	385.316	145	27.8538	9.66616	20.3082	165.477	97.185	12.9997	31.0301	4.48243	20.5872	5.51009	1.89017	5.88263	0.968928	5.80415	1.139	2.9236	0.401911	2.38177	0.362244	218.472	1.38656	8.85025	27.9188	3.80126	0.597643	0.39001	2.50476	10.9788	0.494495	391.049
l_12	49.2969	2.10602	15.6376	11.4255	0.180107	7.42699	10.078	2.87406	0.70123	0.273745	57.1446	153.485	311.538	30.1033	331.603	234.184	11.3819	383.326	144.916	28.1246	9.7219	20.0626	163.867	98.5236	13.112	31.2415	4.50528	20.7317	5.51913	1.89557	5.91717	0.972194	5.81542	1.14108	2.92809	0.404431	2.38732	0.363287	225.052	1.39864	8.84573	28.0208	3.78459	0.595819	0.395335	2.54229	10.9672	0.393527	388.788
l_13	49.2496	2.09837	15.6204	11.4208	0.179939	7.52781	10.0988	2.84474	0.690275	0.26927	57.3906	156.793	324.513	30.165	329.651	223.856	11.3316	376.347	143.406	27.5994	9.485	19.9544	169.706	97.625	12.8198	30.6691	4.4249	20.3473	5.45623	1.8758	5.83643	0.962921	5.75317	1.13008	2.90002	0.400281	2.35945	0.359471	215.085	1.36454	8.71793	27.6917	3.75461	0.58719	0.386545	2.45978	10.9669	0.549838	382.136
l_14	49.2366	2.0616	15.9907	11.2817	0.17538	7.30046	10.1368	2.87376	0.676038	0.266955	56.9785	150.391	289.837	29.3767	324.393	224.166	11.0218	389.85	140.568	27.2477	9.29746	20.2386	161.369	96.5114	12.6299	30.1277	4.35557	20.0571	5.37343	1.8512	5.73229	0.945416	5.65645	1.10836	2.85005	0.392186	2.32248	0.352038	215.918	1.3015	8.53661	27.2109	3.68313	0.578441	0.376125	2.38273	10.6185	0.468544	396.003
l_15	49.2879	2.03378	15.6644	11.245	0.178135	7.73646	10.1142	2.81232	0.669676	0.258097	58.3892	168.868	341.166	29.8151	323.796	215.409	11.0162	373.971	138.157	26.8902	9.2948	19.7177	164.256	95.3229	12.4048	29.6256	4.28052	19.6708	5.2807	1.82126	5.66839	0.934789	5.59912	1.09796	2.82607	0.389402	2.29666	0.350545	206.899	1.3406	8.4497	26.9589	3.64636	0.569064	0.375785	2.40804	10.7387	0.243021	379.296
l_16	49.2685	2.10155	15.6536	11.4735	0.179156	7.46453	10.0001	2.85882	0.72267	0.277644	57.0835	153.939	322.16	29.8325	329.02	241.068	12.1294	386.027	145.29	28.0717	9.64439	20.0132	166.035	98.9584	13.2714	31.4968	4.53914	20.7845	5.53641	1.89715	5.90453	0.968491	5.80389	1.13801	2.91873	0.404021	2.3877	0.364076	232.103	1.43588	8.86017	27.9858	3.78683	0.598224	0.402184	2.592	11.5441	0.662896	391.506
l_17	49.3388	2.06859	15.8564	11.2678	0.176493	7.34134	10.1164	2.87476	0.692412	0.267023	57.1509	147.166	292.476	29.6411	325.013	224.775	11.4188	387.644	141.677	27.5048	9.36175	20.0426	164.62	97.0216	12.8364	30.5698	4.41004	20.2537	5.4168	1.86902	5.78666	0.953115	5.69787	1.1168	2.86906	0.396761	2.33946	0.357634	215.767	1.37344	8.71741	27.4352	3.71449	0.587633	0.394364	2.47405	10.9731	0.514894	392.644
l_18	49.2584	2.09647	15.5629	11.4099	0.180134	7.54866	10.1865	2.82574	0.663587	0.26779	57.5089	156.321	336.25	30.3736	329.557	225.35	10.8142	378.222	144.454	27.9428	9.70229	19.733	161.32	98.1925	12.8876	30.7556	4.43518	20.4289	5.46206	1.8784	5.85625	0.966055	5.77334	1.13016	2.89821	0.400078	2.36752	0.358825	216.383	1.3825	8.82521	27.7866	3.75716	0.596647	0.382617	2.47431	10.3484	0.398208	383.701
l_19	49.2568	2.07852	15.9322	11.2821	0.178437	7.30131	10.156	2.86828	0.6798	0.266513	56.9538	150.665	308.422	29.8129	327.292	227.305	10.6378	387.787	143.594	27.8157	9.42784	19.9707	160.446	97.0181	12.8144	30.6591	4.42323	20.3265	5.4702	1.87195	5.81882	0.960426	5.74097	1.12712	2.8852	0.399025	2.35706	0.359857	218.651	1.38383	8.63135	27.6643	3.73962	0.583424	0.379931	2.4995	10.1862	0.199744	393.443
l_20	49.123	2.07479	15.8312	11.387	0.178414	7.47132	10.097	2.88716	0.679823	0.27027	57.2302	154.283	309.873	29.6832	327.31	227.103	10.8035	391.902	141.011	27.4988	9.51281	20.0098	158.876	98.0512	12.7925	30.4614	4.39689	20.2844	5.41684	1.86668	5.79512	0.951642	5.68965	1.11783	2.8671	0.395402	2.33533	0.356425	218.723	1.30676	8.61013	27.4159	3.69124	0.579028	0.3742	2.41584	10.4249	0.559196	398.283
l_21	49.1391	2.0793	15.6866	11.4126	0.178958	7.58175	10.1191	2.86943	0.663855	0.269337	57.5525	158.561	331.038	30.1688	328.815	226.922	10.3315	386.106	140.544	27.4333	9.49555	19.9873	156.662	98.1367	12.7227	30.3812	4.38484	20.2246	5.41123	1.86542	5.78988	0.952964	5.68744	1.11955	2.87001	0.395373	2.33449	0.356174	217.568	1.32552	8.62685	27.4292	3.68716	0.580919	0.370187	2.42026	9.99657	0.494536	392.762
l_22	49.2061	2.07158	15.9025	11.3439	0.177329	7.3965	10.0742	2.8571	0.698902	0.272024	57.0841	151.81	311.567	29.4028	324.518	232.197	11.5846	395.367	141.696	27.227	9.43969	19.9997	166.278	97.3371	12.9201	30.8042	4.43644	20.3746	5.4386	1.8707	5.79117	0.94836	5.67483	1.11243	2.8586	0.39417	2.32975	0.354762	223.029	1.36599	8.65541	27.3356	3.70595	0.580337	0.381079	2.50664	11.1503	0.755212	401.124
l_23	49.1902	2.08666	15.6403	11.4113	0.181025	7.59318	10.0824	2.85383	0.687674	0.273359	57.6874	157.553	323.542	30.2016	328.232	233.772	11.0143	389.362	142.269	27.5414	9.55152	19.8881	161.888	98.2001	12.9745	30.8796	4.45236	20.4785	5.46016	1.87534	5.83296	0.957547	5.72447	1.12302	2.87707	0.397459	2.34714	0.358764	224.861	1.35307	8.78538	27.5552	3.73061	0.591483	0.375642	2.48008	10.57	0.466693	394.896
l_24	49.2556	2.11476	15.9332	11.4369	0.178566	7.17964	10.009	2.8986	0.717176	0.27659	56.3663	141.195	265.943	29.373	328.787	232.314	11.5891	389.427	143.763	27.6885	9.32416	20.3891	164.057	98.2656	13.1037	31.2384	4.50355	20.7061	5.5272	1.89889	5.89402	0.970038	5.7951	1.13845	2.92124	0.402625	2.37662	0.363306	224.065	1.38394	8.81095	27.9121	3.79077	0.590435	0.392364	2.51247	11.276	0.469857	396.389
l_25	49.1972	2.12101	15.8304	11.4554	0.178263	7.32536	10.0367	2.89058	0.68914	0.276003	56.7482	147.711	286.95	29.8777	330.681	233.617	11.0226	390.903	144.054	27.7771	9.56822	20.3294	167.776	98.4772	13.077	31.1758	4.49894	20.6998	5.51496	1.898	5.87538	0.966376	5.79012	1.13379	2.91062	0.400593	2.36907	0.361006	224.728	1.36379	8.86023	27.8008	3.77982	0.599375	0.386374	2.50485	10.6317	0.552282	396.585
l_26	49.3069	2.07396	16.0204	11.2343	0.176124	7.25291	10.0847	2.89324	0.684673	0.272757	56.8409	152.771	307.86	29.2834	321.888	234.518	10.8417	393.004	143.9	27.7195	9.70743	20.1199	162.131	96.8915	13.1003	30.9944	4.47849	20.4603	5.46261	1.87508	5.81398	0.956702	5.7188	1.12112	2.87809	0.397031	2.34496	0.357444	225.479	1.41062	8.78276	27.5592	3.7358	0.598144	0.387556	2.53708	10.4464	0.417872	397.922
l_27	49.2534	2.13021	15.7902	11.4146	0.179542	7.34825	10.0366	2.86368	0.707433	0.276132	56.9383	149.008	299.434	29.812	328.693	233.671	11.3639	382.563	146.2	27.8998	9.78776	20.1325	168.629	98.1716	13.2281	31.5594	4.54343	20.8241	5.55958	1.90473	5.9236	0.973702	5.8196	1.14212	2.93126	0.403804	2.38631	0.364246	224.719	1.42154	8.99887	28.0274	3.82545	0.605794	0.388453	2.55865	11.015	0.485668	388.53
l_28	49.2337	2.08178	15.8946	11.2701	0.177893	7.37046	10.1307	2.88173	0.68735	0.271668	57.2659	152.031	305.757	29.5712	326.606	230.771	11.2575	395.244	142.741	27.453	9.66658	20.0286	162.169	97.4851	12.937	30.8218	4.44265	20.4204	5.45275	1.86907	5.80628	0.952923	5.70099	1.11841	2.86705	0.395093	2.33962	0.357139	221.672	1.34366	8.7849	27.4853	3.73041	0.590873	0.37811	2.46415	10.8296	0.646802	401.268
l_29	49.2616	2.03221	15.8109	11.2231	0.176778	7.55843	10.1543	2.84349	0.67695	0.262356	57.9483	158.614	325.87	29.8246	322.539	221.779	10.9843	380.665	139.809	27.1877	9.32612	19.9009	159.916	95.7759	12.4924	29.8209	4.31026	19.8083	5.31244	1.83225	5.68657	0.938333	5.61138	1.10248	2.82521	0.390862	2.30462	0.351864	212.967	1.32569	8.43729	27.0452	3.64672	0.571701	0.379802	2.4054	10.582	0.65406	385.776
l_30	49.2153	2.10678	15.5628	11.5119	0.182313	7.56833	9.99541	2.85662	0.725525	0.274913	57.2689	159.759	331.13	29.7574	329.47	236.038	11.9883	377.077	146.691	28.1326	9.73787	19.992	162.698	99.1815	13.1868	31.3683	4.51792	20.7357	5.54014	1.89658	5.92049	0.975651	5.82951	1.1447	2.93431	0.407035	2.39711	0.366099	226.991	1.43708	8.82517	28.1017	3.81079	0.597476	0.405981	2.60076	11.4339	0.324123	382.648
l_31	49.2547	2.10395	15.8657	11.381	0.178567	7.31224	10.049	2.87007	0.709306	0.275583	56.839	148.023	300.652	29.6725	326.887	235.296	11.2892	389.995	144.522	27.7862	9.54595	20.2226	164.196	97.7295	13.1519	31.3168	4.51766	20.6966	5.53287	1.89606	5.88256	0.967243	5.79144	1.13481	2.90815	0.401195	2.37375	0.362926	226.511	1.39975	8.85596	27.8319	3.78947	0.59791	0.386675	2.54168	10.8956	0.502545	395.404
l_32	49.2632	2.0537	15.8886	11.2511	0.176475	7.4329	10.1398	2.85921	0.66725	0.267796	57.4074	155.413	323.574	29.7086	323.168	230.879	10.7747	391.832	141.85	27.4238	9.58216	20.0349	159.225	96.647	12.7945	30.4901	4.39568	20.1781	5.38566	1.85725	5.74237	0.944782	5.6546	1.10717	2.84452	0.391669	2.32442	0.353066	221.673	1.35178	8.64522	27.2494	3.68585	0.587026	0.372495	2.46816	10.2918	0.59271	396.525
l_33	49.2441	2.08009	15.8536	11.3227	0.177457	7.37637	10.1088	2.87102	0.696092	0.269763	57.1461	150.175	305.239	29.9686	327.243	229.994	11.2661	389.731	142.166	27.6377	9.55885	19.9681	166.506	97.0713	12.8263	30.5931	4.41788	20.3149	5.4366	1.86673	5.79758	0.953593	5.70378	1.11914	2.86969	0.396656	2.34248	0.357302	221.749	1.35653	8.63224	27.4894	3.71465	0.583831	0.38542	2.47614	10.7478	0.46972	395.217
l_34	49.2527	2.06347	15.8083	11.3051	0.177188	7.51405	10.0841	2.83731	0.689567	0.268096	57.5057	155.572	316.296	29.6079	322.533	226.269	11.2461	383.165	141.1	27.2077	9.44422	19.8616	162.462	96.9018	12.8411	30.5395	4.39781	20.2093	5.39068	1.8549	5.76473	0.947453	5.67202	1.11318	2.8517	0.39346	2.32578	0.354008	218.224	1.36292	8.69703	27.3109	3.70545	0.583086	0.38377	2.46174	10.943	0.672047	388.992
l_35	49.3056	2.0372	15.8999	11.2	0.176481	7.4073	10.2151	2.84303	0.653598	0.261806	57.4663	152.195	308.261	29.8017	321.486	220.049	10.4951	387.164	139.638	27.314	9.37504	19.9296	154.149	95.7946	12.6246	30.0579	4.34301	19.9787	5.34172	1.8498	5.7245	0.94288	5.65518	1.10693	2.84565	0.392637	2.32217	0.353096	211.347	1.3364	8.57469	27.2376	3.65715	0.578069	0.374023	2.40635	10.0492	0.410598	392.504
l_36	49.1451	2.08564	15.7886	11.4709	0.178033	7.45532	10.0983	2.8339	0.678874	0.265269	56.9813	154.897	311.254	30.0992	331.192	225.098	10.95	376.568	141.288	27.5736	9.11547	20.1645	166.018	97.5551	12.608	30.1411	4.36712	20.1012	5.41046	1.86148	5.7801	0.956623	5.72692	1.12341	2.89482	0.397045	2.35653	0.357372	216.656	1.34731	8.46989	27.5695	3.70548	0.578589	0.378672	2.45162	10.5907	0.451137	381.738
l_37	49.2688	2.0794	15.6497	11.3645	0.179057	7.57819	10.0972	2.84121	0.673097	0.268907	57.7493	158.756	334.556	29.9432	326.312	227.996	10.7765	381.086	143.029	27.5484	9.46746	19.8387	163.731	97.2965	12.8288	30.668	4.41921	20.299	5.4239	1.86262	5.79455	0.954326	5.7065	1.12072	2.87331	0.396411	2.34158	0.355695	219.219	1.36931	8.68973	27.4865	3.73292	0.585706	0.375481	2.46302	10.3749	0.431018	387.185
l_38	49.1752	2.0882	15.9502	11.3868	0.176802	7.29068	10.0842	2.89395	0.682349	0.271585	56.6279	147.879	288.136	29.664	328.941	230.797	10.7549	393.941	141.041	27.5204	9.32614	20.2009	168.406	97.6171	12.8172	30.5496	4.41191	20.3108	5.4286	1.87035	5.80376	0.95198	5.70514	1.12105	2.88074	0.397304	2.34832	0.35694	222.317	1.34003	8.59402	27.4899	3.69857	0.578425	0.381128	2.47448	10.4486	0.753872	399.92
l_39	49.2057	2.08336	15.5925	11.3791	0.179106	7.6837	10.1446	2.80036	0.666681	0.264958	58.0184	163.502	344.264	30.0593	327.082	220.021	10.7517	373.228	142.78	27.6535	9.54775	19.875	157.241	97.3346	12.8495	30.5834	4.41429	20.2916	5.42572	1.8698	5.82035	0.958486	5.74221	1.12639	2.88623	0.397261	2.34961	0.357054	210.654	1.38215	8.81146	27.6336	3.74289	0.593041	0.377582	2.44699	10.3722	0.315929	378.165
l_40	49.2838	2.12056	15.8409	11.3826	0.17925	7.21977	10.0954	2.89971	0.703172	0.274868	56.5321	144.066	290.076	29.9517	330.539	229.324	11.4978	384.584	145.781	28.0298	9.56807	20.2036	168.269	97.7533	13.0663	31.2519	4.50835	20.7129	5.54981	1.90148	5.92569	0.977519	5.83118	1.14507	2.94458	0.406318	2.40271	0.36466	221.031	1.39108	8.82766	28.0802	3.82043	0.597494	0.39416	2.51483	11.0996	0.510144	390.662
l_41	49.2958	2.11477	15.7802	11.4137	0.17962	7.26962	10.0705	2.88322	0.716153	0.276446	56.5496	144.684	302.298	30.0294	330.406	238.304	11.5881	390.655	145.518	28.0613	9.53263	20.2447	165.647	98.3422	13.2238	31.5335	4.53928	20.8632	5.56299	1.90451	5.9256	0.97493	5.82692	1.14298	2.93551	0.405129	2.3995	0.365158	229.706	1.42345	8.86497	28.0397	3.81138	0.599419	0.399415	2.60101	11.1449	0.538731	395.954
l_42	49.2575	2.0896	16.0066	11.3232	0.177831	7.16184	10.1174	2.8976	0.696202	0.272262	56.4397	143.198	280.507	29.6344	329.925	230.918	11.332	394.63	142.374	27.5402	9.28167	20.3515	163.502	97.1337	12.8866	30.7533	4.44272	20.441	5.46642	1.88134	5.83276	0.96111	5.74517	1.12664	2.89294	0.398874	2.35766	0.359323	222.383	1.34541	8.63278	27.6308	3.73748	0.581362	0.383127	2.48045	10.9037	0.527345	400.68
l_43	49.2108	2.11947	15.6648	11.5079	0.181197	7.39433	10.0797	2.86474	0.703201	0.273904	56.8741	147.538	298.842	30.5038	335.879	234.915	11.2974	387.744	143.662	27.8929	9.34052	20.1989	165.606	98.6555	12.9589	30.9697	4.47567	20.6063	5.51595	1.89209	5.8821	0.968773	5.7949	1.13597	2.91676	0.402839	2.37715	0.361624	225.928	1.35806	8.66985	27.85	3.76438	0.5875	0.384681	2.51304	10.839	0.430628	392.993
l_44	49.1618	2.05027	15.9676	11.3125	0.176907	7.38968	10.155	2.86215	0.661893	0.262239	57.2526	152.82	294.101	29.5878	326.122	219.356	10.569	388.004	138.34	27.153	9.06094	20.0221	162.11	96.5911	12.4143	29.6294	4.29756	19.7978	5.33218	1.84414	5.70732	0.941172	5.63751	1.10553	2.84146	0.392019	2.31678	0.352908	211.073	1.281	8.37957	27.1672	3.63495	0.567687	0.364857	2.3536	10.1695	0.415253	394.331
l_45	49.2332	2.0756	15.8381	11.3495	0.179202	7.4178	10.0437	2.88974	0.700273	0.272921	57.1999	153.454	301.88	29.4009	324.599	232.068	11.3267	394.103	141.9	27.3725	9.49648	20.2153	163.098	97.4845	12.9431	30.7745	4.44026	20.3881	5.42958	1.87592	5.80753	0.953325	5.70071	1.11734	2.8678	0.395785	2.33466	0.356449	223.643	1.34311	8.72501	27.4081	3.72524	0.588634	0.382684	2.46883	10.9307	0.37653	399.978
l_46	49.2708	2.10114	15.9691	11.3156	0.177273	7.18641	10.1014	2.89664	0.70629	0.275355	56.6175	144.967	279.781	29.5969	328.416	232.661	11.6118	390.096	143.799	27.7822	9.36096	20.4119	163.628	97.4284	13.0024	31.0621	4.4793	20.6019	5.50096	1.88972	5.87212	0.967467	5.78746	1.13493	2.91169	0.401385	2.37268	0.360678	224.001	1.37902	8.75003	27.8441	3.77427	0.589408	0.39269	2.51378	11.1985	0.607208	396.85
l_47	49.3633	2.1067	15.7745	11.3326	0.179095	7.25879	10.1033	2.88713	0.720399	0.27417	56.7052	147.833	298.38	29.8909	329.934	233.807	12.1306	386.857	145.668	28.0545	9.74656	20.1649	160.237	98.3444	13.1838	31.3625	4.52057	20.7565	5.54905	1.89562	5.90778	0.974224	5.81842	1.14144	2.92938	0.40414	2.38992	0.365237	225.02	1.42533	8.86377	28.052	3.80512	0.598364	0.407276	2.56375	11.5801	0.443319	393.175
l_48	49.2256	2.07395	15.7649	11.3368	0.179452	7.47327	10.1812	2.84864	0.653298	0.262966	57.4401	155.806	320.04	30.0527	327.763	218.128	10.4737	379.364	140.728	27.3765	9.30362	20.0069	163.107	96.8577	12.5711	30.1386	4.35354	20.0724	5.38375	1.85705	5.76164	0.952627	5.69891	1.11791	2.87129	0.395441	2.33801	0.355518	209.472	1.31853	8.58847	27.4289	3.70436	0.580892	0.368579	2.38259	10.1495	0.348519	385.915
l_49	49.0513	2.07442	16.1166	11.3368	0.177551	7.24279	10.1536	2.9191	0.660316	0.267458	56.6257	147.812	285.384	29.3877	327.046	225.596	9.95715	396.57	140.141	27.353	9.26759	20.3281	163.033	97.3356	12.5705	30.019	4.35352	20.1158	5.38684	1.86682	5.76907	0.949708	5.67792	1.11689	2.86516	0.395023	2.33443	0.354552	217.135	1.26335	8.45925	27.355	3.67071	0.573357	0.360518	2.38251	9.64991	0.444697	403.119
l_50	49.3335	2.12594	15.8265	11.3738	0.179686	7.16213	10.0906	2.92307	0.706468	0.278304	56.2465	145.178	295.965	29.811	329.744	237.407	11.4716	392.271	146.566	28.1598	9.65203	20.3066	163.783	98.6702	13.3202	31.733	4.57132	21.0025	5.57963	1.91875	5.9639	0.980635	5.8636	1.14808	2.94672	0.406612	2.39953	0.365427	228.648	1.42241	8.99347	28.1432	3.84452	0.609707	0.402545	2.58437	11.0517	0.393769	398.776
SD
Repeat Number	SiO2	TiO2	Al2O3	FeO*	MnO	MgO	CaO	Na2O	K2O	P2O5	Mg#	Ni	Cr	Sc	V	Ba	Rb	Sr	Zr	Y	Nb	Ga	Cu	Zn	La ppm	Ce ppm	Pr ppm	Nd ppm	Sm ppm	Eu ppm	Gd ppm	Tb ppm	Dy ppm	Ho ppm	Er ppm	Tm ppm	Yb ppm	Lu ppm	Ba ppm	Th ppm	Nb ppm	Y ppm	Hf ppm	Ta ppm	U ppm	Pb ppm	Rb ppm	Cs ppm	Sr ppm
1	0.633891	0.2933	1.28318	0.829105	0.0146161	1.52165	0.46896	0.293541	0.165456	0.0515497	5.30454	57.5603	161.075	2.81886	34.4683	52.7438	3.99754	68.8039	24.9816	3.50154	1.89543	1.57737	37.288	8.67869	2.37276	5.44068	0.747301	3.31628	0.80202	0.233718	0.804856	0.13077	0.758298	0.148043	0.386459	0.051912	0.30993	0.0481523	51.9633	0.368536	1.53961	3.62431	0.591241	0.110441	0.106022	0.568947	3.8026	1.02974	69.0962
2	0.622929	0.2912	1.25517	0.827669	0.0156537	1.52052	0.514734	0.293745	0.178903	0.0564769	5.47032	59.8143	154.681	3.23849	36.8971	56.8456	4.301	66.1461	24.9186	3.56462	2.03667	1.72141	40.7007	8.8733	2.61412	5.88931	0.807198	3.52993	0.837493	0.249232	0.830374	0.133821	0.787182	0.155221	0.389835	0.0544799	0.327329	0.0509506	56.3291	0.393604	1.67711	3.75925	0.615751	0.111097	0.109651	0.632364	3.89688	1.59899	66.4019
3	0.656437	0.300739	1.24378	0.806708	0.0132825	1.59273	0.459231	0.28948	0.204733	0.0568501	5.57768	62.8309	167.528	2.76352	37.4874	62.5374	4.65554	69.6853	25.2637	3.74891	1.88923	1.80487	42.1014	8.763	2.78279	6.20713	0.85733	3.74573	0.876616	0.256704	0.872901	0.136075	0.802609	0.158541	0.391625	0.0559114	0.324621	0.0507303	61.5334	0.450788	1.64422	3.79185	0.624426	0.111382	0.134524	0.728567	4.31921	0.783647	70.4274
4	0.668491	0.275289	1.22413	0.846933	0.0128836	1.54425	0.509383	0.287234	0.179443	0.0513883	5.15244	62.1906	180.468	2.7116	31.5851	56.4211	3.76767	66.9391	23.3246	3.46998	2.02512	1.67952	37.9042	8.91618	2.60064	5.74376	0.777243	3.39067	0.777351	0.235362	0.773246	0.122323	0.728948	0.140213	0.355117	0.0502475	0.296127	0.0472157	56.0831	0.411607	1.64676	3.51554	0.563804	0.106072	0.110368	0.630582	3.51018	0.543844	66.8776
5	0.743276	0.3336	1.16535	0.819066	0.014187	1.57225	0.498915	0.28925	0.214742	0.0581702	5.67376	63.7653	176.473	2.85319	39.3157	62.4102	4.9927	61.6211	28.1773	4.06904	2.0535	1.70041	45.5854	9.37639	2.87492	6.46669	0.881822	3.84346	0.918868	0.265119	0.912056	0.14557	0.858524	0.166872	0.42307	0.0592907	0.350796	0.0537612	61.1706	0.481499	1.80657	4.10544	0.668742	0.122715	0.143986	0.74824	4.5163	1.43234	62.2344
6	0.602481	0.345594	1.27482	0.87421	0.0158341	1.57621	0.544612	0.307911	0.212098	0.06198	5.66988	60.8961	167.182	3.19894	39.503	61.1799	4.68486	64.418	28.4929	4.07084	2.11664	1.81608	41.1731	9.86992	3.01194	6.79734	0.930382	4.10674	0.977053	0.288322	0.979144	0.157521	0.92671	0.181177	0.460118	0.0633505	0.376473	0.0587468	60.4566	0.456107	1.94149	4.40879	0.715725	0.128885	0.131993	0.739627	4.40998	1.5865	64.7203
7	0.700091	0.295089	1.24117	0.881741	0.0140735	1.56921	0.516703	0.288539	0.191156	0.0549593	5.23891	63.0604	190.346	2.70177	34.4493	55.3485	4.43739	65.1737	24.7897	3.57117	2.07435	1.68253	41.8633	8.7125	2.62384	5.90779	0.798435	3.48799	0.81869	0.238196	0.81113	0.128778	0.74797	0.146954	0.382389	0.0520425	0.306586	0.0484909	54.3792	0.433629	1.62645	3.64128	0.587095	0.109857	0.120977	0.660379	4.03827	1.01846	65.8913
8	0.711596	0.314664	1.38199	0.924437	0.0138045	1.59559	0.493496	0.287792	0.182517	0.0517067	5.41112	64.4215	178.252	3.11905	38.0073	54.695	4.13206	67.7093	25.001	3.78491	1.88445	1.72294	37.8809	8.98869	2.5059	5.69791	0.778646	3.43094	0.823145	0.238529	0.826005	0.133072	0.784356	0.155637	0.396775	0.0541368	0.324281	0.0492519	53.0425	0.410163	1.58469	3.79481	0.600921	0.10742	0.112793	0.619507	3.73145	0.967753	68.4435
9	0.699085	0.29342	1.31554	0.882752	0.0171908	1.55024	0.570814	0.288568	0.211311	0.0579129	5.59456	61.5429	152.611	3.02475	34.2882	61.1731	4.91829	71.3647	24.4929	3.33096	1.98222	1.69283	41.1453	9.02639	2.77993	6.24857	0.837114	3.608	0.850342	0.248468	0.831357	0.132292	0.77443	0.151619	0.389904	0.0545301	0.31691	0.050882	60.4011	0.473274	1.70692	3.66361	0.625698	0.112715	0.131748	0.738677	4.62832	1.50031	72.0733
10	0.662472	0.283216	1.45142	0.916874	0.0144734	1.57727	0.492727	0.285189	0.170674	0.0524546	5.34603	59.6781	159.543	3.041	35.9971	54.8906	4.14675	71.103	23.6961	3.55805	1.96066	1.68712	42.4553	9.01911	2.35069	5.34201	0.734287	3.205	0.773203	0.224064	0.762783	0.12436	0.729891	0.141561	0.364753	0.0505336	0.30514	0.0464545	54.4297	0.359179	1.46966	3.49772	0.554045	0.103902	0.105804	0.568947	3.74958	1.37527	70.9898
11	0.635593	0.310714	1.40636	0.89089	0.015904	1.55833	0.480273	0.29142	0.177501	0.0551176	5.53886	60.5195	156.478	3.2685	37.6243	53.8413	4.05879	72.2091	25.1429	3.63846	1.82472	1.82767	40.6835	9.11369	2.44984	5.70757	0.784538	3.48358	0.853382	0.247376	0.848263	0.138018	0.807997	0.158486	0.40804	0.0562741	0.335816	0.0518288	53.4389	0.364429	1.57116	3.82528	0.624683	0.107164	0.10544	0.590772	3.84176	1.39082	72.6556
12	0.647385	0.301224	1.09844	0.772571	0.0134824	1.50019	0.501167	0.284029	0.20312	0.0569613	5.60472	63.8295	163.637	2.74005	36.7921	59.7274	4.58612	65.6183	25.2795	3.58656	1.88627	1.70486	40.42	9.0518	2.70211	6.07632	0.83097	3.6257	0.870581	0.255769	0.859409	0.137453	0.805178	0.157374	0.398449	0.055527	0.329485	0.0517023	59.1197	0.436914	1.66778	3.82306	0.627749	0.110854	0.124641	0.682718	4.32535	1.05312	66.9203
13	0.648469	0.335838	1.30675	0.890695	0.0167744	1.67025	0.485915	0.309925	0.186619	0.0625801	5.79665	67.678	182.838	3.08654	41.0178	57.817	4.29658	66.7074	26.8626	3.87824	2.08283	2.04006	40.3061	9.55881	2.83931	6.53569	0.895412	3.99255	0.949577	0.283622	0.955286	0.152285	0.888642	0.17389	0.437355	0.0607582	0.360108	0.0549823	56.4945	0.405324	1.84905	4.20246	0.684397	0.120385	0.111335	0.658861	4.07533	1.50226	67.4032
14	0.576267	0.311835	1.39952	0.86706	0.0162055	1.57299	0.490564	0.298773	0.180998	0.0573638	5.53111	58.3331	161.39	3.14412	37.108	56.3973	4.15738	75.1205	25.654	3.69279	1.89593	1.72839	41.239	9.7598	2.65137	6.01076	0.826208	3.65539	0.870935	0.257909	0.866462	0.138359	0.808424	0.159695	0.400662	0.0561945	0.330077	0.0521511	56.3601	0.382094	1.70515	3.85325	0.629987	0.114008	0.109462	0.631211	3.85123	1.26395	75.7305
15	0.670439	0.30032	1.40565	0.92686	0.0144028	1.73285	0.48198	0.29373	0.171182	0.0526864	5.83296	69.5281	182.24	2.86743	37.1866	49.6565	3.80721	71.2342	23.6163	3.37026	1.85773	2.00587	37.8074	9.26682	2.43623	5.62229	0.773202	3.41821	0.828063	0.243806	0.821214	0.132283	0.765397	0.148458	0.383751	0.0525085	0.309769	0.0485475	48.8082	0.375075	1.54742	3.60443	0.596567	0.1054	0.10378	0.578912	3.71494	0.357049	71.5764
16	0.665347	0.325226	1.22127	0.831401	0.0157376	1.63077	0.485637	0.306295	0.2123	0.0622322	5.83918	65.1768	184.451	2.99186	38.6289	63.7738	4.95709	66.7692	26.9533	3.87366	2.0745	1.81285	42.4434	9.22193	2.86794	6.43435	0.882534	3.90084	0.928912	0.274361	0.92698	0.146547	0.863337	0.167892	0.419174	0.0583957	0.346733	0.0533889	62.4228	0.430357	1.77981	4.09071	0.658561	0.119408	0.134297	0.705561	4.52074	1.74916	67.205
17	0.692746	0.297999	1.23378	0.808602	0.0132107	1.57642	0.537984	0.292103	0.198522	0.0544193	5.57235	60.3063	155.392	2.88466	35.4522	56.7714	4.59477	67.2628	24.1796	3.40902	1.78161	1.77771	44.617	7.98679	2.55369	5.82862	0.796772	3.48087	0.83641	0.244774	0.822447	0.132126	0.785623	0.152537	0.393685	0.0545472	0.321936	0.0494069	55.8102	0.431058	1.61013	3.65238	0.621179	0.10864	0.126928	0.69656	4.29783	1.43551	67.6546
18	0.569925	0.338819	1.29411	0.86556	0.0152388	1.61741	0.481394	0.297004	0.193984	0.0595421	5.85428	65.3506	177.567	2.9581	40.5451	57.8884	4.28354	68.7411	27.7158	4.2015	2.02259	1.76449	46.6319	9.8752	2.78014	6.39605	0.878381	3.9152	0.948279	0.279627	0.941382	0.152314	0.898019	0.174854	0.432329	0.061067	0.367395	0.0555359	57.0901	0.405372	1.82736	4.26651	0.676717	0.120265	0.114639	0.675077	3.99308	1.04157	69.8138
19	0.687661	0.304936	1.35608	0.878575	0.0134457	1.62426	0.461684	0.299026	0.191383	0.0507684	5.67957	64.2972	172.165	2.97631	36.6995	57.491	4.33839	70.77	25.1451	3.76392	1.94926	1.47224	39.0335	8.95279	2.54501	5.75549	0.788086	3.42925	0.834151	0.240765	0.81902	0.132572	0.775791	0.153326	0.390335	0.0542378	0.319709	0.0498222	56.5623	0.440881	1.57829	3.72344	0.601007	0.106753	0.128611	0.652692	3.96355	0.266804	71.9404
20	0.638107	0.26236	1.31999	0.733558	0.0138999	1.683	0.481507	0.322601	0.179668	0.0529417	5.80337	64.6283	182.919	2.77164	32.7582	56.3406	4.12772	70.4096	21.7586	3.16492	1.79658	1.70162	44.2184	7.91334	2.26939	5.14321	0.705533	3.09247	0.741595	0.21526	0.719657	0.115112	0.673003	0.133079	0.342346	0.0474078	0.286316	0.0441445	56.1633	0.342316	1.37193	3.25882	0.519215	0.0908414	0.100205	0.569123	3.81619	1.61151	71.6392
21	0.607585	0.302526	1.26988	0.752709	0.013296	1.65436	0.506338	0.31923	0.191939	0.0583202	5.99838	65.0841	177.967	2.82364	36.4303	58.7338	4.23083	70.3323	24.6476	3.52585	1.86569	1.66425	43.6099	8.48001	2.71201	6.1238	0.83585	3.65703	0.868983	0.257011	0.860065	0.138117	0.803012	0.159418	0.403347	0.0558078	0.330552	0.0517991	57.8328	0.417239	1.73248	3.83289	0.622933	0.111938	0.113657	0.676169	4.01606	1.34317	71.6334
22	0.610474	0.307129	1.5035	0.895567	0.017639	1.69644	0.540931	0.316027	0.198044	0.058407	5.70549	65.0182	189.04	3.19775	36.2975	58.317	4.66814	72.9451	25.3104	3.70488	1.99776	1.896	41.9946	9.1324	2.63915	6.03951	0.817035	3.61022	0.869021	0.251849	0.863899	0.138711	0.813298	0.159383	0.413128	0.056356	0.336987	0.0522198	57.0582	0.404144	1.66376	3.9132	0.625197	0.110605	0.118444	0.643992	4.33159	1.9106	72.8888
23	0.608699	0.298111	1.14817	0.802194	0.0146764	1.56344	0.503114	0.297275	0.189379	0.0567771	5.69639	62.864	170.841	2.82676	35.965	61.1369	4.26111	63.6431	26.3542	3.85336	2.19893	1.64222	44.3802	9.13469	2.69458	6.00326	0.82812	3.57785	0.853137	0.25085	0.844832	0.136653	0.802334	0.156896	0.39389	0.0551371	0.330996	0.0508445	60.2256	0.41098	1.70158	3.85739	0.617059	0.115011	0.116951	0.658972	3.93643	1.2959	64.0215
24	0.691561	0.319712	1.24126	0.979194	0.0167579	1.42681	0.545284	0.287992	0.201655	0.0581573	5.30188	56.7045	144.589	2.94311	36.9833	59.997	4.59602	71.3088	24.8877	3.55789	1.93224	1.72045	43.3317	9.49891	2.65076	6.05318	0.825496	3.65802	0.868235	0.255584	0.8752	0.139251	0.820191	0.164783	0.422139	0.057763	0.337772	0.0521045	59.8946	0.427321	1.60862	3.89622	0.641178	0.107404	0.121863	0.68799	4.33379	1.40338	72.2313
25	0.600685	0.31384	1.28142	0.886165	0.0159773	1.51388	0.48283	0.28637	0.201569	0.0586524	5.44547	59.8976	161.006	2.99185	38.8911	61.0643	4.53096	67.5523	26.5727	3.95556	1.95746	1.676	43.9973	9.23619	2.69636	6.09526	0.840431	3.68303	0.885043	0.259596	0.883434	0.141948	0.831317	0.163344	0.409196	0.0574025	0.34342	0.0526739	60.2504	0.40107	1.6743	3.99843	0.626561	0.114355	0.118909	0.664099	4.08484	1.56337	67.4401
26	0.657757	0.285214	1.50066	0.893832	0.0151591	1.67927	0.504045	0.306665	0.199051	0.0549251	5.65576	63.7972	180.345	3.12959	33.9932	58.1826	4.39147	79.2147	22.6004	3.43042	1.79948	1.73803	41.3832	8.85124	2.51634	5.66672	0.777054	3.3746	0.803059	0.235153	0.782991	0.126129	0.737311	0.14386	0.362052	0.050992	0.302057	0.0487356	57.0242	0.383533	1.53232	3.50997	0.564144	0.104065	0.115272	0.621879	4.04164	1.25869	79.2407
27	0.669287	0.312031	1.30304	0.921161	0.0160968	1.50298	0.520759	0.283623	0.188613	0.0562704	5.25371	61.6192	166.323	3.00677	35.5761	55.229	4.04879	69.3915	23.3376	3.46953	1.81248	1.72495	40.5718	8.82418	2.52178	5.82816	0.796881	3.51835	0.842401	0.247207	0.833581	0.134826	0.789619	0.155024	0.400318	0.0546475	0.323204	0.0501953	54.1485	0.385755	1.56372	3.72297	0.604317	0.104129	0.104979	0.620657	3.9729	1.42087	69.5367
28	0.581876	0.285337	1.39473	0.80581	0.0163644	1.54376	0.456857	0.292903	0.168202	0.0545037	5.41614	59.8147	160.191	3.14061	35.878	56.7281	4.07541	72.3581	24.3414	3.64231	1.92832	1.53094	43.6281	9.04998	2.36715	5.38945	0.743956	3.26202	0.788631	0.228285	0.775217	0.126165	0.741826	0.144726	0.366057	0.050905	0.309924	0.0467824	56.179	0.327673	1.51396	3.56168	0.559863	0.103231	0.100726	0.535732	3.73784	1.72989	72.5256
29	0.65587	0.291977	1.26656	0.830987	0.0145438	1.6178	0.486128	0.313324	0.17886	0.0573781	5.58757	62.5917	168.172	2.99913	35.4196	59.0052	4.20373	67.3863	25.2864	3.5593	2.07277	1.69295	41.1652	8.68758	2.71	6.0616	0.827429	3.59928	0.83768	0.250082	0.828175	0.133038	0.775356	0.152074	0.388586	0.053621	0.317424	0.0495767	57.7116	0.413564	1.71588	3.70107	0.614425	0.114085	0.122024	0.644694	3.81904	1.63568	67.6847
30	0.644888	0.34243	1.13493	0.813914	0.0138798	1.72857	0.48531	0.315705	0.219711	0.062576	6.25605	71.5841	202.322	2.64282	37.6149	64.0234	4.82841	59.7852	27.5139	3.94687	1.94476	1.88323	41.0422	9.72705	3.03017	6.8585	0.933094	4.10236	0.978545	0.289798	0.976087	0.154431	0.90802	0.175322	0.4489	0.0620221	0.363013	0.0566024	63.0273	0.474753	1.87585	4.25138	0.698485	0.124148	0.140062	0.76423	4.5731	0.816208	60.8451
31	0.678232	0.316544	1.24607	0.869508	0.0146088	1.54464	0.519896	0.300168	0.195124	0.0574936	5.5026	60.2614	167.392	3.08399	36.0814	59.9463	4.28368	63.8562	27.0369	3.83083	2.11594	1.73907	41.5879	9.07922	2.7478	6.20229	0.846857	3.69014	0.89117	0.256871	0.879632	0.141713	0.834123	0.163037	0.420072	0.057439	0.344357	0.0534784	59.2782	0.419681	1.75748	3.98548	0.656428	0.118201	0.118975	0.671825	4.00701	1.40914	64.5218
32	0.524841	0.301885	1.45941	0.794171	0.0159276	1.68153	0.48105	0.319893	0.182815	0.0570988	5.77474	62.1453	175.902	3.05972	34.8835	57.6121	4.11709	77.9115	24.0514	3.51713	1.72251	1.61947	43.2066	8.74252	2.5098	5.75047	0.792371	3.50605	0.836516	0.249634	0.825396	0.132871	0.774855	0.149378	0.382408	0.0528246	0.313093	0.0487393	56.3498	0.34644	1.59549	3.62314	0.591595	0.108567	0.105686	0.594888	3.84816	1.62163	77.6752
33	0.675244	0.288519	1.24741	0.820137	0.0131738	1.57622	0.478764	0.306887	0.170935	0.0520525	5.5863	61.7308	166.877	3.0176	33.6789	53.6547	3.94332	69.4266	24.2231	3.56649	1.88609	1.52595	41.1121	8.46608	2.43618	5.50161	0.757191	3.31882	0.799474	0.234839	0.785312	0.127442	0.745175	0.145685	0.363585	0.0505873	0.305991	0.0464645	53.1403	0.392432	1.57932	3.56324	0.579382	0.106911	0.113096	0.596665	3.57316	1.29481	70.2779
34	0.64752	0.327834	1.41046	0.926903	0.0168757	1.77665	0.529918	0.326221	0.2067	0.0624352	6.06859	66.3881	184.926	3.00792	35.7045	61.9323	4.53211	73.3563	25.8342	3.82389	2.0651	2.00997	45.6829	9.65075	2.75388	6.31205	0.864651	3.85162	0.9009	0.268365	0.910171	0.145574	0.852556	0.16659	0.428212	0.0590092	0.349281	0.053249	61.5419	0.407459	1.6684	4.06005	0.650816	0.110117	0.122078	0.692434	4.28481	1.74125	73.2407
35	0.602052	0.305599	1.4029	0.87837	0.0152132	1.64577	0.470582	0.293292	0.202061	0.0543999	5.72421	60.1012	160.134	2.92433	36.7264	58.3368	4.75662	73.9098	25.4673	3.68877	1.92438	1.84111	42.9822	9.28128	2.55282	5.79841	0.8022	3.53714	0.856727	0.252457	0.845344	0.136406	0.797929	0.157985	0.404551	0.0557522	0.330515	0.051722	57.5422	0.401629	1.54195	3.81543	0.617685	0.106195	0.122459	0.666286	4.30739	1.22817	73.5148
36	0.632867	0.352971	1.4156	1.00486	0.0158642	1.72714	0.566626	0.326052	0.195844	0.063287	6.11649	67.3783	180.361	3.20088	39.8287	62.4737	4.10112	74.9411	28.3893	4.20507	2.13064	1.91939	43.32	10.325	3.06788	6.93541	0.946857	4.19688	0.984988	0.292434	0.987705	0.155846	0.917435	0.178863	0.448352	0.0630312	0.36912	0.0582328	61.846	0.463912	1.93634	4.38397	0.704493	0.131101	0.124846	0.742306	3.81455	1.08561	75.7675
37	0.623518	0.292213	1.23636	0.802862	0.0139385	1.58649	0.450088	0.299447	0.182137	0.0539556	5.33445	64.3701	186.658	2.99049	36.6424	53.0046	4.23104	67.8743	23.3879	3.35029	1.88242	1.79888	37.3379	8.39385	2.41401	5.50795	0.756901	3.36287	0.80085	0.240431	0.793877	0.128553	0.746646	0.147154	0.373195	0.0504995	0.305116	0.0471718	52.138	0.352325	1.58068	3.55017	0.580932	0.104166	0.10873	0.560256	3.8713	1.2159	68.8415
38	0.638696	0.301851	1.41887	0.867468	0.0153857	1.67776	0.526915	0.317403	0.211546	0.0581905	5.89034	64.1356	167.993	3.13635	37.0872	64.306	4.60831	75.2276	25.8911	3.83529	2.01688	1.8773	41.2656	9.27278	2.81061	6.25075	0.853066	3.70674	0.870262	0.253068	0.85589	0.13604	0.810283	0.157739	0.398866	0.0563257	0.334459	0.0523512	63.8192	0.461981	1.68858	3.87012	0.629657	0.112778	0.134629	0.739415	4.29871	1.88502	75.933
39	0.667299	0.32575	1.36998	0.935537	0.0159404	1.63346	0.491101	0.266674	0.203265	0.057957	5.64292	66.7023	174.728	3.03838	41.3747	59.2843	4.56983	64.0521	26.5639	3.97115	2.08148	1.81124	48.1004	9.58434	2.69716	6.15474	0.842677	3.69269	0.904634	0.26082	0.888177	0.14301	0.838576	0.163921	0.407976	0.0580846	0.347107	0.0532329	58.1915	0.395607	1.68939	4.03019	0.631507	0.111303	0.114661	0.650989	4.11207	1.00601	64.3679
40	0.685745	0.304477	1.29291	0.831679	0.015705	1.53723	0.479359	0.292	0.180466	0.0543007	5.40124	61.2898	169.14	3.15902	35.8204	53.3574	4.05211	70.046	23.8469	3.47333	1.75298	1.69323	38.213	8.34169	2.52324	5.78219	0.793058	3.49557	0.835584	0.246681	0.83632	0.133825	0.784389	0.155999	0.394213	0.0547651	0.319771	0.0500049	52.6124	0.412373	1.60226	3.67794	0.615305	0.107122	0.113316	0.63398	3.94502	1.43659	70.737
41	0.6574	0.313241	1.23066	0.75321	0.0125649	1.60836	0.53146	0.309257	0.212016	0.0571202	5.82807	62.0388	173.23	2.96402	34.6043	59.8374	4.66576	65.8502	26.569	3.81702	1.84534	1.71502	40.6876	8.45052	2.79993	6.29369	0.853514	3.7109	0.886523	0.256895	0.883641	0.14164	0.835519	0.163313	0.420716	0.0579023	0.342486	0.0530551	59.7704	0.485742	1.74952	3.95821	0.660122	0.118112	0.138277	0.757244	4.42697	1.39503	67.0129
42	0.665155	0.319953	1.41184	0.963873	0.0167918	1.56839	0.502082	0.294828	0.20024	0.0592234	5.53444	57.7053	162.42	3.15732	40.1102	59.6398	4.6747	71.5063	26.4187	3.80114	2.07653	1.79113	38.9501	10.1278	2.79483	6.30921	0.861079	3.81285	0.902187	0.266246	0.908733	0.145289	0.850751	0.168321	0.427576	0.0595819	0.348018	0.054687	59.1626	0.445765	1.74877	4.03963	0.660915	0.117359	0.133855	0.703019	4.35444	1.39734	71.5973
43	0.657542	0.331415	1.09196	0.836565	0.0145538	1.5035	0.538843	0.295772	0.220335	0.0591352	5.6295	59.9671	165.457	2.99127	37.8725	61.4624	4.94186	60.5028	29.3272	4.17823	2.20558	1.58228	39.3321	9.65183	3.1158	6.93332	0.940876	4.07897	0.965705	0.285665	0.972913	0.155695	0.918517	0.179953	0.456483	0.0632464	0.373222	0.0594111	60.5598	0.522343	2.00176	4.39988	0.723477	0.133627	0.148281	0.798727	4.5615	0.917951	61.0369
44	0.624605	0.299787	1.31532	0.861874	0.0158053	1.53231	0.448626	0.297516	0.180302	0.0547308	5.45453	58.633	158.634	2.82556	37.3812	58.7462	4.29398	72.3192	25.2425	3.72331	2.01163	1.70961	41.9413	9.33608	2.58332	5.78464	0.80092	3.53403	0.84983	0.249238	0.836717	0.13237	0.78078	0.153758	0.384692	0.0540485	0.31913	0.0500335	58.0141	0.37744	1.60469	3.7482	0.600025	0.109832	0.110526	0.612988	3.92148	1.28978	73.0802
45	0.624468	0.291503	1.29153	0.777168	0.0150942	1.61296	0.499817	0.290609	0.195507	0.0546389	5.58069	60.7703	172.013	2.9792	33.2722	57.0995	4.55956	62.4184	25.3134	3.55867	1.9022	1.89005	39.0852	8.79935	2.63261	5.89631	0.805977	3.52517	0.842263	0.244013	0.846463	0.136164	0.796649	0.157163	0.402062	0.0553205	0.329328	0.0508635	56.795	0.419205	1.65085	3.80558	0.624271	0.11221	0.121888	0.675604	4.32696	1.05626	62.2775
46	0.640556	0.343999	1.3264	0.975236	0.0177559	1.45844	0.492376	0.278754	0.207768	0.0629976	5.50428	57.7884	144.412	3.12812	41.003	64.1808	4.95449	68.9444	29.495	4.09746	2.22421	1.64971	40.1724	10.3181	3.01333	6.81168	0.929101	4.09484	0.976371	0.283575	0.983711	0.157177	0.912	0.181571	0.459903	0.0633756	0.370964	0.0582685	62.6273	0.461207	1.8918	4.38641	0.709677	0.127167	0.138758	0.72531	4.5595	1.5949	69.6033
47	0.656047	0.314379	1.31047	0.833033	0.0150868	1.59407	0.4758	0.298796	0.204574	0.0587054	5.87327	62.4372	169.547	2.89026	38.3247	59.6431	4.84482	70.9768	25.6808	3.6881	1.83274	1.6867	40.0416	9.32102	2.69777	6.13382	0.839709	3.70685	0.893513	0.259123	0.888456	0.141217	0.823366	0.163291	0.415346	0.057463	0.337102	0.0531782	58.8137	0.436427	1.63318	3.91502	0.636496	0.11019	0.130667	0.694658	4.5096	1.22339	72.3041
48	0.648479	0.299499	1.34005	0.817322	0.0158848	1.59265	0.412254	0.287947	0.162668	0.0519078	5.34518	60.6207	168.186	2.94475	37.2044	51.2603	4.06526	69.1621	24.2333	3.60216	1.90906	1.79563	39.5097	8.93527	2.34921	5.4197	0.750158	3.32944	0.801734	0.23822	0.800471	0.129781	0.750457	0.147754	0.375182	0.0517235	0.309248	0.0467481	50.3536	0.344289	1.53235	3.59984	0.575895	0.105002	0.0962526	0.544468	3.74485	1.03124	69.4077
49	0.527903	0.291029	1.35539	0.849668	0.0145032	1.61569	0.453481	0.312088	0.154583	0.0503167	5.69166	60.6516	165.557	2.9983	33.8149	52.6541	3.36733	69.2458	23.5382	3.48051	1.77754	1.66923	40.4762	9.0246	2.33601	5.31388	0.730044	3.25045	0.771743	0.233318	0.781718	0.127367	0.751125	0.147625	0.379029	0.0521465	0.312093	0.0478818	52.7414	0.332255	1.52512	3.60349	0.572087	0.104161	0.0964154	0.546054	3.11285	1.26921	69.5934
50	0.649704	0.317014	1.33113	0.839548	0.0147046	1.63452	0.497999	0.29098	0.200172	0.0546138	5.86713	61.4024	168.916	3.12083	37.4729	56.8427	4.75281	63.3291	25.8466	3.71009	1.92673	1.75034	39.9703	9.41148	2.58195	5.89795	0.808546	3.53974	0.864822	0.253767	0.870412	0.143097	0.834426	0.164898	0.426709	0.0588439	0.347984	0.0536805	56.5193	0.433387	1.63091	3.96191	0.642509	0.112669	0.129628	0.68786	4.46764	1.01577	62.5395
[truncated: 3 more columns]

## Sheet: Upper Bootstrap
100 iterations
Average
Repeat Number	SiO2	TiO2	Al2O3	FeO*	MnO	MgO	CaO	Na2O	K2O	P2O5	Mg#	Ni	Cr	Sc	V	Ba	Rb	Sr	Zr	Y	Nb	Ga	Cu	Zn	La ppm	Ce ppm	Pr ppm	Nd ppm	Sm ppm	Eu ppm	Gd ppm	Tb ppm	Dy ppm	Ho ppm	Er ppm	Tm ppm	Yb ppm	Lu ppm	Ba ppm	Th ppm	Nb ppm	Y ppm	Hf ppm	Ta ppm	U ppm	Pb ppm	Rb ppm	Cs ppm	Sr ppm
u_1	49.581	2.45621	16.0337	12.5308	0.192368	5.41643	8.54796	3.47426	1.30281	0.464455	47.109	83.6142	64.8634	28.9573	342.071	484.752	21.7533	504.589	184.109	34.741	11.1821	21.8113	203.542	117.311	20.8772	47.4391	6.73896	30.206	7.57825	2.3956	7.65768	1.22513	7.27642	1.4312	3.71683	0.515568	3.1047	0.482967	479.781	2.34043	11.0335	35.6621	4.87103	0.712118	0.687328	4.88539	21.6931	0.321877	515.464
u_2	49.6163	2.50118	16.0394	12.59	0.193477	5.23821	8.56709	3.46651	1.32235	0.465432	46.2455	78.0455	60.7153	29.1732	349.13	488.543	22.1605	497.595	187.892	35.6104	11.3339	22.1052	207.998	118.25	21.2506	48.0533	6.87925	30.8154	7.76702	2.44261	7.85331	1.25595	7.4745	1.47151	3.82148	0.530272	3.19374	0.495102	483.475	2.39885	11.286	36.6873	4.9874	0.730695	0.719031	5.00829	22.1619	0.359718	509.728
u_3	49.816	2.37607	16.2752	12.2869	0.189457	5.28602	8.42443	3.52011	1.35152	0.474328	47.0155	79.788	59.6544	27.6888	329.908	501.861	22.4991	519.122	181.494	33.845	10.9947	21.8232	191.539	115.207	21.4986	48.1488	6.83051	30.3904	7.53351	2.37771	7.53751	1.20147	7.11743	1.39833	3.63898	0.504847	3.03642	0.471338	497.763	2.37668	11.0906	34.9197	4.81582	0.711884	0.699276	4.95916	22.6431	0.320738	531.704
u_4	49.8852	2.41228	16.181	12.3407	0.189163	5.19141	8.41404	3.53998	1.36543	0.48074	46.4245	78.5227	62.2904	28.0719	332.662	511.406	22.9829	518.378	184.909	34.655	11.2861	21.8204	190.528	116.365	21.6889	48.5124	6.90099	30.7541	7.6306	2.3996	7.65062	1.21853	7.22125	1.41803	3.69307	0.512344	3.08744	0.479497	506.265	2.39694	11.1031	35.4941	4.86114	0.713645	0.720652	5.07846	22.9689	0.324002	528.792
u_5	49.6484	2.3765	16.2754	12.4046	0.189753	5.3585	8.52285	3.49395	1.27827	0.45175	47.1939	84.5922	63.017	28.0073	336.158	485	20.9603	517.321	177.534	33.5571	10.7437	21.7654	199.104	115.958	20.6191	46.353	6.5954	29.4797	7.37235	2.34219	7.41551	1.18355	7.04653	1.38598	3.60693	0.499627	3.0094	0.467532	479.606	2.30123	10.7354	34.5729	4.71163	0.693001	0.686337	4.82383	21.018	0.318339	529.261
u_6	49.6709	2.42645	16.1389	12.443	0.190937	5.37033	8.47586	3.50252	1.31158	0.469445	47.0598	83.1355	61.1945	28.2662	332.795	490.566	21.8675	506.742	184.841	34.7911	11.1186	21.7546	203.128	117.083	21.4725	48.1722	6.86384	30.6401	7.64966	2.40423	7.67882	1.22673	7.27421	1.42917	3.7208	0.517179	3.10977	0.482892	486.184	2.38485	11.1702	35.7541	4.88823	0.720364	0.725646	4.92502	21.9162	0.295531	517.919
u_7	49.7318	2.51484	15.9499	12.544	0.193943	5.17395	8.51415	3.51608	1.36458	0.496711	45.9741	71.5294	61.245	29.1682	348.569	509.469	22.0607	506.165	190.134	35.7925	11.52	22.014	201.053	119.24	22.29	50.1241	7.14279	31.8652	7.92979	2.47871	7.97585	1.26943	7.5209	1.47814	3.84681	0.53377	3.21027	0.49965	504.675	2.42269	11.5995	36.986	5.03185	0.740896	0.711075	5.14915	22.2673	0.319197	519.341
u_8	49.84	2.48145	16.0197	12.4538	0.191855	5.17704	8.461	3.51544	1.37769	0.482074	46.2141	75.3467	64.1733	28.4843	339.755	505.321	23.1346	501.169	190.449	35.3547	11.5483	21.8614	197.385	118.056	21.9606	49.5544	7.03131	31.3534	7.82229	2.44745	7.85688	1.25201	7.4403	1.46167	3.79531	0.527502	3.17659	0.492608	499.789	2.48464	11.5294	36.4017	5.03384	0.743799	0.732675	5.17783	23.2703	0.349154	512.584
u_9	49.8277	2.44144	16.0869	12.3564	0.191227	5.2418	8.51784	3.48901	1.36606	0.481574	46.6451	75.5607	61.4736	28.7513	341.436	504.708	22.4266	510.661	185.698	34.5727	11.1913	22.0162	195.407	116.39	21.6136	48.9473	6.93792	30.9242	7.7282	2.41841	7.72684	1.23317	7.30936	1.43629	3.72675	0.518128	3.11649	0.484261	500.007	2.41089	11.2432	35.6837	4.92675	0.723797	0.721924	5.10849	22.4304	0.365503	522.245
u_10	49.7392	2.43629	16.0858	12.516	0.191574	5.34831	8.43601	3.47011	1.32632	0.450331	46.8822	83.9709	64.15	28.6194	339.282	493.493	22.5005	498.702	184.688	34.7621	10.9786	21.8801	203.147	117.134	20.8949	47.2013	6.70313	29.9677	7.51602	2.37576	7.58868	1.21572	7.23298	1.42499	3.70833	0.514692	3.10204	0.480685	488.925	2.50389	10.9308	35.5588	4.88712	0.711607	0.746998	5.06476	22.4806	0.366033	509.523
u_11	49.5654	2.47358	15.9747	12.5986	0.194152	5.3875	8.59598	3.44478	1.30385	0.461361	46.8251	80.5814	64.5151	29.5205	347.513	482.958	21.5637	499.191	185.277	35.159	11.0638	21.8966	219.106	117.903	20.8832	47.4243	6.75963	30.2866	7.63292	2.40551	7.71264	1.23529	7.36619	1.45057	3.76781	0.523433	3.14664	0.489933	477.633	2.40192	11.0028	36.0619	4.91541	0.712226	0.7176	4.97453	21.5478	0.350452	510.532
u_12	49.8856	2.46165	15.9884	12.4823	0.193398	5.17272	8.4181	3.51328	1.39667	0.487855	46.0978	75.3945	60.0682	28.9949	343.19	515.367	23.2988	505.405	188.528	35.1316	11.3348	22.0731	194.842	117.857	21.9323	49.4432	7.00656	31.2266	7.782	2.43672	7.79797	1.24504	7.39282	1.45481	3.77401	0.525438	3.16732	0.490652	510.429	2.48201	11.3169	36.2085	4.98543	0.730949	0.753822	5.23787	23.3411	0.361304	515.974
u_13	49.4288	2.40882	16.2443	12.487	0.190609	5.44372	8.71126	3.43744	1.20917	0.438878	47.3799	84.6608	63.8626	28.8609	343.262	462.384	19.8271	515.276	176.35	33.7041	10.7756	21.8492	192.838	116.698	19.943	45.25	6.46891	29.0694	7.34454	2.34334	7.44073	1.18829	7.07075	1.38928	3.60972	0.500535	3.01008	0.466143	457.189	2.19403	10.6505	34.662	4.68897	0.688073	0.653376	4.58219	19.7158	0.29861	526.797
u_14	49.5538	2.43751	16.1423	12.5002	0.190554	5.39755	8.55876	3.47101	1.2922	0.456036	47.2085	84.046	65.4305	28.6687	342.491	482.074	21.3746	501.285	182.512	34.8484	11.0318	21.9138	212.022	117.086	20.9473	46.8385	6.73439	30.166	7.57576	2.38897	7.66531	1.22457	7.30322	1.43713	3.74495	0.520528	3.12474	0.486937	476.493	2.32927	10.9169	35.9502	4.82828	0.706021	0.700352	4.85555	21.4112	0.324718	512.665
u_15	49.8394	2.44988	16.0607	12.3393	0.190776	5.24562	8.5227	3.5017	1.36411	0.485797	46.715	76.3005	65.1172	28.6818	339.955	502.184	22.5024	508.252	186.883	34.9615	11.2474	21.8504	195.176	116.598	21.828	49.1164	6.99377	31.1929	7.77274	2.43676	7.81195	1.24557	7.36813	1.44776	3.76647	0.523345	3.14576	0.488939	497.292	2.37445	11.3394	36.1906	4.94657	0.727753	0.720446	5.04543	22.5916	0.332114	521.092
u_16	49.691	2.41144	16.0901	12.3588	0.190361	5.40585	8.68152	3.44264	1.27512	0.453214	47.4433	80.0533	71.0222	29.0691	343.277	473.55	21.1112	502.64	179.565	34.0342	10.9814	21.8166	195.296	115.677	20.5119	46.3325	6.60609	29.5557	7.42077	2.35501	7.5096	1.20036	7.13823	1.40387	3.65064	0.507502	3.04611	0.473338	469.014	2.262	10.8749	35.0499	4.75025	0.699358	0.683437	4.75811	21.106	0.328171	515.16
u_17	49.746	2.3746	16.2623	12.2629	0.189451	5.34997	8.61364	3.45007	1.30477	0.446316	47.4767	82.7488	73.8173	28.2508	336.479	479.174	21.8677	506.37	179.34	33.4443	10.7506	21.8115	198.67	114.291	20.6361	46.6149	6.61861	29.5215	7.41424	2.34207	7.45025	1.1926	7.07336	1.39187	3.61581	0.503245	3.0213	0.470058	474.883	2.32488	10.9012	34.6699	4.78376	0.706106	0.709114	4.84592	22.0419	0.358493	518.952
u_18	49.4928	2.39895	16.3096	12.3799	0.190774	5.41324	8.65915	3.46551	1.23618	0.45396	47.3713	85.594	64.7952	28.3393	335.955	474.599	19.6891	519.235	177.352	33.9654	10.8365	21.717	196.425	115.038	20.4163	46.1938	6.59364	29.5638	7.41869	2.3617	7.48577	1.19552	7.09908	1.39498	3.62301	0.502692	3.02347	0.468476	470.179	2.24017	10.7292	34.7808	4.71762	0.693293	0.647356	4.72284	19.6729	0.282092	530.409
u_19	49.8206	2.48975	15.9072	12.5298	0.193429	5.23393	8.51469	3.47777	1.36075	0.472095	46.3959	73.1957	64.4412	29.4825	349.836	501.638	22.9197	494.423	188.908	35.3523	11.3657	21.8974	195.969	118.049	21.4184	48.6008	6.89569	30.8303	7.74774	2.43326	7.8036	1.24755	7.42489	1.46149	3.79042	0.527685	3.17589	0.493032	496.23	2.47746	11.3528	36.3328	4.99349	0.732038	0.731503	5.15907	22.9834	0.381884	506.334
u_20	49.6893	2.41205	16.1428	12.4113	0.191165	5.34066	8.55816	3.49166	1.29958	0.463431	47.1055	80.8946	68.2168	28.4127	335.917	487.883	21.8416	511.422	181.407	33.9932	11.0805	21.83	195.088	116.21	20.8838	47.1748	6.69967	29.9254	7.4957	2.37234	7.53117	1.2027	7.14673	1.40478	3.64747	0.506386	3.04609	0.472571	482.978	2.28431	11.0414	34.9816	4.80989	0.71015	0.681271	4.79095	21.851	0.313292	522.607
u_21	49.9864	2.41046	16.0924	12.3211	0.191033	5.13984	8.47323	3.52162	1.38861	0.475359	46.334	73.3189	62.6988	28.7349	343.049	510.793	23.2148	518.024	183.789	34.3755	11.0012	21.9813	193.28	116.288	21.4785	48.3866	6.86393	30.5555	7.63762	2.39404	7.63391	1.2173	7.23446	1.42269	3.69574	0.513618	3.09663	0.481139	505.678	2.42297	11.0299	35.4667	4.87303	0.709702	0.741997	5.17006	23.2989	0.364914	529.191
u_22	49.9666	2.40317	15.9875	12.364	0.191843	5.24935	8.56568	3.47412	1.34104	0.45672	46.7294	79.0619	70.6696	29.3397	343.553	494.63	23.0805	498.361	182.376	34.4829	11.058	21.907	190.289	115.755	20.8272	46.8352	6.6565	29.7364	7.45518	2.35286	7.53142	1.20565	7.18949	1.41612	3.67799	0.510985	3.07825	0.477973	489.892	2.41172	10.9247	35.3126	4.82195	0.706745	0.749709	5.06403	23.061	0.390727	509.503
u_23	49.8157	2.41779	16.1042	12.3789	0.191399	5.28632	8.53777	3.48298	1.32477	0.460198	46.8616	80.653	69.9067	28.5658	337.329	493.538	22.0936	504.809	184.259	34.472	11.0929	21.6608	198.375	115.749	21.1166	47.8267	6.77373	30.2268	7.57313	2.38365	7.61165	1.21523	7.2309	1.42034	3.68512	0.511777	3.08367	0.477646	488.851	2.4279	11.1021	35.3423	4.89464	0.72062	0.725811	5.03289	22.0361	0.34505	515.28
u_24	49.8614	2.40828	16.0826	12.3816	0.190692	5.28957	8.44556	3.4953	1.37374	0.471207	46.8516	79.0251	64.2997	28.5512	337.274	504.35	23.5242	509.482	184.502	34.4746	11.1427	21.7076	196.101	115.831	21.3492	48.0304	6.80905	30.3455	7.56259	2.38151	7.60359	1.2127	7.20635	1.41732	3.68772	0.512914	3.08692	0.480261	499.468	2.40761	11.0652	35.3807	4.86256	0.71301	0.735975	5.04901	23.5409	0.363058	520.54
u_25	49.8107	2.48546	16.0305	12.4617	0.191675	5.19817	8.49616	3.50747	1.33947	0.478695	46.1526	76.4132	58.6068	28.8618	340.166	503.156	22.5207	502.284	190.307	35.4632	11.5892	21.9669	205.764	118.409	21.7974	49.2614	7.01842	31.3367	7.84433	2.45693	7.88525	1.25784	7.46045	1.46407	3.80733	0.527761	3.17558	0.493065	497.748	2.47502	11.4513	36.5281	5.02907	0.739293	0.752652	5.09079	22.4184	0.34676	513.795
u_26	49.8525	2.4464	15.9727	12.4288	0.193191	5.28814	8.5082	3.46604	1.371	0.473	46.8211	78.6937	65.1539	28.9921	342.162	496.816	23.0781	501.412	185.806	34.9759	11.1813	21.9094	194.714	116.634	21.4472	48.3158	6.88269	30.7089	7.68946	2.41578	7.74355	1.23928	7.35791	1.44992	3.76785	0.52339	3.15073	0.489637	492.136	2.43511	11.2529	36.0987	4.93677	0.726285	0.739037	5.07446	23.1121	0.394873	513.585
u_27	49.5086	2.4591	16.1848	12.5781	0.192425	5.28302	8.55999	3.47893	1.29544	0.459649	46.5628	81.7971	66.8572	28.7298	346.336	482.634	21.0906	508.689	182.319	34.6445	10.9723	21.9594	208.253	116.974	20.904	47.0768	6.74229	30.186	7.57859	2.40158	7.65887	1.22278	7.26927	1.43047	3.71731	0.515105	3.09876	0.480681	477.948	2.29985	10.9689	35.651	4.84775	0.709553	0.673241	4.85005	21.062	0.317202	520.762
u_28	49.8937	2.45067	15.9838	12.4701	0.193401	5.20697	8.49996	3.48396	1.34878	0.468668	46.2615	74.6054	58.731	29.3742	341.738	500.544	23.0716	500.562	187.246	35.5831	11.2241	21.803	201.369	116.754	21.4551	48.2778	6.8805	30.7585	7.72331	2.42332	7.78625	1.24644	7.42385	1.46146	3.80438	0.527922	3.1825	0.492639	496.153	2.49786	11.2039	36.4865	4.95217	0.725097	0.77863	5.15456	23.0548	0.379399	512.519
u_29	49.6569	2.41491	16.1663	12.2797	0.189082	5.43612	8.67816	3.44448	1.27945	0.454858	47.7768	83.1004	69.5572	28.5414	337.626	471.591	21.4274	500.494	182.149	34.5145	10.9773	21.8307	204.227	114.805	20.7283	46.8634	6.68219	29.9125	7.51862	2.37293	7.60115	1.21766	7.24467	1.42342	3.70421	0.515146	3.0888	0.481183	466.351	2.34674	11.0512	35.5495	4.8197	0.715342	0.717986	4.82972	21.4709	0.328063	512.186
u_30	49.9402	2.43428	16.1411	12.3641	0.191007	5.14288	8.43916	3.5113	1.36704	0.469037	46.1906	75.7954	63.5443	28.7261	341.394	506.575	23.1399	512.551	185.035	34.5664	11.0763	22.1277	196.406	116.866	21.3677	48.0328	6.8372	30.5167	7.63052	2.39397	7.66361	1.22391	7.25121	1.42591	3.71314	0.515017	3.09749	0.481151	500.92	2.44649	11.0249	35.6148	4.89013	0.711895	0.736924	5.10923	23.3168	0.370576	523.906
u_31	49.6947	2.43041	16.0199	12.522	0.193145	5.33824	8.57397	3.46241	1.30728	0.457954	46.7608	79.7143	66.7109	29.2814	343.355	485.797	21.8708	505.306	182.594	34.5785	10.967	21.8703	202.673	117.224	20.8708	47.1951	6.71771	30.0696	7.5446	2.38086	7.62364	1.21811	7.24606	1.42557	3.70645	0.514326	3.09256	0.479196	481.224	2.34943	10.9612	35.5748	4.85222	0.707641	0.711508	4.92034	21.9229	0.343328	517.486
u_32	50.1033	2.38802	15.9792	12.2709	0.191372	5.26156	8.41159	3.51221	1.40079	0.481059	46.6598	74.3516	61.8044	28.4651	328.856	514.214	23.7128	515.983	186.328	34.48	11.2478	21.446	193.405	116.123	22.0331	49.4532	6.98374	30.9899	7.6739	2.39518	7.66663	1.22097	7.23496	1.42244	3.7073	0.514411	3.09809	0.48214	509.458	2.53506	11.3073	35.5189	4.9292	0.723834	0.787773	5.27146	23.8687	0.373246	528.477
u_33	49.8127	2.46808	16.0427	12.4722	0.192197	5.20592	8.52961	3.4789	1.33235	0.465383	46.3327	76.0272	62.0041	28.8317	340.664	492.879	22.9507	499.923	186.769	35.0756	11.4414	21.9892	196.248	117.624	21.3752	48.1139	6.86462	30.662	7.69368	2.42443	7.76454	1.24102	7.38551	1.45151	3.77308	0.522973	3.15051	0.487781	488	2.45392	11.3776	36.2362	4.95211	0.735556	0.742295	5.01188	22.9546	0.37593	512.756
u_34	50.0089	2.45227	16.1059	12.3518	0.190457	5.04027	8.41172	3.54736	1.40431	0.487098	45.7444	71.4014	61.9579	28.2119	338.361	518.328	23.2754	513.552	188.99	35.0253	11.3275	22.0357	195.158	117.077	22.0535	49.5605	7.02855	31.2735	7.77685	2.42699	7.77973	1.23858	7.34328	1.44254	3.75331	0.521319	3.14118	0.487705	513.244	2.47815	11.348	36.0041	4.98243	0.728577	0.747165	5.26976	23.4364	0.351185	524.433
u_35	49.6429	2.35103	16.3011	12.2589	0.1896	5.40754	8.67485	3.46766	1.25731	0.449113	47.6894	83.6821	69.8549	28.363	333.916	473.352	20.9532	514.063	175.177	33.1228	10.7869	21.749	183.03	113.326	20.0883	45.5261	6.46386	28.9248	7.25385	2.31982	7.32776	1.17247	6.96847	1.37006	3.55406	0.49431	2.96782	0.460091	468.76	2.19793	10.6812	34.0739	4.64857	0.688623	0.655421	4.66639	21.0519	0.318573	525.565
u_36	49.5411	2.44926	16.166	12.4402	0.191383	5.37385	8.66832	3.45189	1.25963	0.458326	47.2075	79.2139	66.2333	28.867	340.754	475.672	20.6256	505.95	181.806	34.6193	10.9583	21.8521	203.056	115.97	20.7369	46.88	6.70896	30.071	7.57406	2.3987	7.65884	1.22529	7.27187	1.43039	3.71838	0.516169	3.10259	0.4815	470.693	2.29803	11.0205	35.671	4.8265	0.711124	0.680815	4.75917	20.7161	0.306	518.572
u_37	49.7147	2.48219	16.0114	12.5461	0.194092	5.27869	8.57144	3.46049	1.28933	0.451547	46.4905	79.029	65.0115	29.3356	345.136	481.881	21.9377	488.682	186.676	35.5482	11.1285	22.1398	209.244	118.091	21.1458	47.3504	6.80315	30.4824	7.69623	2.41309	7.80569	1.25237	7.43356	1.46652	3.82091	0.529912	3.18942	0.494728	476.698	2.45417	11.1677	36.6728	4.94551	0.725684	0.759944	4.97351	22.0934	0.354077	501.005
u_38	50.0205	2.48032	16.0301	12.362	0.19211	5.0898	8.4061	3.50121	1.43001	0.487853	45.9219	72.9485	61.7602	28.8124	338.921	517.388	24.6055	499.527	194.246	35.5827	11.7222	21.9483	201.949	117.495	22.2998	50.4635	7.12809	31.7203	7.91503	2.4668	7.91796	1.26364	7.50609	1.47522	3.82614	0.531854	3.20481	0.49642	512.775	2.60146	11.7504	36.6843	5.12402	0.759818	0.791659	5.3894	24.6784	0.400507	511.1
u_39	49.7149	2.4541	16.0656	12.4809	0.19299	5.28574	8.56473	3.47648	1.30294	0.461602	46.7145	77.4043	64.3899	29.2505	345.54	488.877	21.5486	504.635	183.439	35.0215	10.9748	22.0175	206.787	117.119	21.0535	47.428	6.78785	30.3981	7.6642	2.40563	7.72383	1.23521	7.33781	1.44416	3.7569	0.521121	3.13974	0.48721	484.134	2.36205	10.9765	36.0921	4.87925	0.708579	0.706726	4.91756	21.6108	0.322963	516.389
u_40	49.746	2.46319	16.0976	12.5126	0.193311	5.2061	8.4456	3.51005	1.35189	0.473642	46.2767	75.9909	67.7659	28.7622	345.465	503.642	22.5487	507.174	185.417	34.5899	11.1749	22.1162	197.318	117.01	21.4112	48.3407	6.86455	30.5956	7.65499	2.41595	7.70088	1.22782	7.29151	1.43448	3.73141	0.517992	3.11441	0.482753	498.644	2.41988	11.1809	35.7418	4.92285	0.72181	0.71262	5.0835	22.7092	0.330501	519.402
u_41	49.6976	2.51819	15.9557	12.5623	0.194928	5.21282	8.53312	3.49361	1.34899	0.482769	46.1753	74.911	60.6151	29.1253	352.403	499.155	22.0157	502.926	189.684	35.7041	11.2529	22.2374	208.792	118.616	21.865	49.2251	7.04504	31.4989	7.90447	2.46329	7.96672	1.27228	7.55164	1.48792	3.87167	0.537528	3.23394	0.503952	493.284	2.45466	11.3753	37.1346	5.03493	0.733076	0.735747	5.14517	22.3236	0.344307	515.777
u_42	49.6428	2.39653	16.2305	12.3859	0.191862	5.33922	8.66693	3.44203	1.26559	0.438652	47.1778	81.5835	70.7815	28.8511	342.933	472.879	20.8306	507.111	177.462	33.8688	10.6059	21.9969	206.179	115.574	20.2144	45.708	6.53321	29.2735	7.39838	2.34513	7.46568	1.19782	7.12791	1.40443	3.65304	0.506885	3.04777	0.472411	468.596	2.26167	10.6729	35.0123	4.74585	0.690703	0.685278	4.76447	20.9704	0.337068	519.908
u_43	49.8098	2.41376	16.1162	12.3504	0.191504	5.31378	8.47924	3.51282	1.33605	0.47645	46.9856	80.1639	63.3423	28.2862	336.92	503.457	21.5871	516.303	182.503	34.5469	10.9151	21.8568	186.196	116.307	21.5885	48.2889	6.88916	30.7115	7.6469	2.3988	7.65613	1.22109	7.2369	1.42053	3.6993	0.513334	3.09072	0.480904	498.944	2.38837	11.0593	35.5823	4.83816	0.71011	0.6978	5.03303	21.7495	0.311368	528.598
u_44	49.8891	2.44195	16.3444	12.2591	0.187696	5.07753	8.38253	3.55752	1.37726	0.482942	46.1006	76.6668	59.6965	27.3817	330.122	512.477	22.9812	515.638	190.03	34.8051	11.3643	22.0925	201.407	116.48	22.1748	49.736	7.06003	31.4031	7.81049	2.43956	7.79375	1.24082	7.35039	1.44191	3.7549	0.52072	3.13579	0.487277	507.068	2.51102	11.424	36.0306	5.01393	0.73694	0.75507	5.18957	23.2318	0.318705	527.016
u_45	49.6561	2.47318	15.9975	12.5521	0.19387	5.30309	8.49447	3.51541	1.32806	0.486186	46.5343	76.8691	62.2439	29.1804	346.528	498.245	21.7043	517.859	185.095	34.9732	11.2046	21.9488	201.99	118.075	21.4785	48.6809	6.92883	30.969	7.74781	2.43336	7.77279	1.24109	7.35973	1.44616	3.75328	0.522067	3.14093	0.486982	493.315	2.30329	11.1966	36.0549	4.91168	0.716379	0.685255	4.98204	21.7896	0.306155	530.722
u_46	49.8741	2.49893	15.9627	12.4918	0.194373	5.1376	8.45552	3.51617	1.38298	0.485878	45.8887	70.8795	61.2147	29.4111	346.105	512.461	23.248	498.914	190.964	35.618	11.4231	22.0622	208.065	117.992	22.0087	49.7402	7.06744	31.5528	7.89262	2.46616	7.94839	1.26858	7.52016	1.48111	3.84672	0.534684	3.21628	0.499606	507.676	2.51311	11.482	36.9424	5.06493	0.73841	0.767689	5.25596	23.5752	0.369212	512.193
u_47	49.7932	2.39482	16.1162	12.304	0.191239	5.38125	8.62556	3.43844	1.30803	0.447144	47.5249	80.5248	67.6363	28.7582	340.014	476.921	22.0642	498.469	181.203	34.1229	10.8487	21.8955	197.533	114.273	20.5692	46.5537	6.61366	29.5651	7.4406	2.35473	7.52348	1.20526	7.18411	1.41401	3.68171	0.510895	3.07355	0.476989	472.675	2.38579	10.9606	35.2539	4.81588	0.71093	0.732865	4.89119	22.232	0.361224	511.376
u_48	49.8589	2.44003	16.2391	12.3004	0.190004	5.15046	8.48531	3.50415	1.36033	0.471362	46.2968	77.4548	59.9223	28.2833	338.342	502.53	22.6985	508.481	187.642	34.9948	11.2883	22.0701	197.503	116.312	21.7211	48.6979	6.95529	30.9977	7.74985	2.42467	7.77777	1.24066	7.36703	1.44737	3.77336	0.523577	3.1504	0.489529	497.377	2.48547	11.2399	36.1545	4.96038	0.727451	0.763006	5.16088	22.8349	0.351415	519.41
u_49	49.6547	2.44926	16.0263	12.5226	0.191872	5.34973	8.55972	3.46411	1.32066	0.461097	46.9354	79.3338	62.7094	28.5674	343.622	484.545	21.6537	503.399	184.442	34.4985	11.0843	21.6791	199.634	117.167	21.2076	47.8758	6.80884	30.4167	7.61488	2.39777	7.67466	1.22275	7.27047	1.42894	3.71221	0.514425	3.09579	0.481322	480.196	2.38877	11.235	35.5668	4.90655	0.724903	0.6932	4.93698	21.7166	0.346391	516.242
u_50	50.0503	2.49354	15.9707	12.4357	0.192097	5.04325	8.3784	3.51866	1.43121	0.486155	45.5263	70.4257	57.4441	28.9606	340.833	520.033	24.7902	495.001	194.573	35.7413	11.728	22.1139	204.724	118.234	22.2362	50.2104	7.11075	31.6685	7.9066	2.46539	7.93207	1.26698	7.52021	1.47827	3.84664	0.534335	3.21848	0.500048	514.664	2.61945	11.6029	36.8241	5.11816	0.750259	0.8189	5.38039	24.8322	0.419179	506.163
SD
Repeat Number	SiO2	TiO2	Al2O3	FeO*	MnO	MgO	CaO	Na2O	K2O	P2O5	Mg#	Ni	Cr	Sc	V	Ba	Rb	Sr	Zr	Y	Nb	Ga	Cu	Zn	La ppm	Ce ppm	Pr ppm	Nd ppm	Sm ppm	Eu ppm	Gd ppm	Tb ppm	Dy ppm	Ho ppm	Er ppm	Tm ppm	Yb ppm	Lu ppm	Ba ppm	Th ppm	Nb ppm	Y ppm	Hf ppm	Ta ppm	U ppm	Pb ppm	Rb ppm	Cs ppm	Sr ppm
1	1.49955	0.411577	1.04201	1.08892	0.0176923	1.14455	0.892294	0.293927	0.45261	0.13442	6.00436	39.7407	38.8446	3.70314	47.5461	143.985	9.94808	71.0216	42.8091	6.56814	2.48303	1.34828	74.156	13.2527	5.90214	12.4611	1.71093	7.16656	1.65731	0.395404	1.54027	0.240519	1.40268	0.278853	0.734726	0.102809	0.631509	0.0976364	144.585	1.01157	2.56152	7.08448	1.10694	0.167219	0.368756	1.77142	10.0892	0.288755	70.4035
2	1.50065	0.407563	1.19952	1.09268	0.0175339	1.03806	0.762939	0.226899	0.424665	0.116671	5.67211	38.7926	38.6628	4.17165	48.8193	123.079	10.2074	61.6244	41.5708	6.6818	2.42071	1.19017	68.7393	13.0304	5.26722	11.5114	1.57905	6.75092	1.60896	0.387343	1.5393	0.239622	1.40761	0.280829	0.741333	0.103023	0.638523	0.0989079	122.428	0.947971	2.47604	7.19126	1.06448	0.159221	0.36474	1.6975	10.3353	0.330844	61.0106
3	1.5815	0.385481	0.996744	1.05773	0.0162694	1.08682	0.924593	0.323387	0.497273	0.142656	5.49686	35.4128	37.2714	3.61301	46.9611	156.061	10.9767	76.3667	41.2015	6.24443	2.33782	1.36281	72.4158	12.5327	6.07163	12.5445	1.70099	7.04896	1.57061	0.366278	1.44596	0.22552	1.302	0.258501	0.689107	0.0954079	0.587145	0.0924543	156.294	0.987412	2.36595	6.62878	1.04148	0.15204	0.366528	1.7944	11.2594	0.29099	74.0838
4	1.65591	0.379142	0.992331	1.05929	0.0165645	1.09917	0.932474	0.333327	0.473953	0.14417	5.69853	38.0141	40.7767	4.03244	47.1351	159.749	10.6592	79.1489	40.4989	6.20871	2.43483	1.37983	72.7309	12.7374	6.08887	12.4852	1.69192	7.0003	1.54461	0.364628	1.43032	0.22148	1.29056	0.256431	0.685032	0.0943854	0.582364	0.0904188	159.456	0.974441	2.37702	6.67044	1.01087	0.151872	0.362646	1.80045	10.7825	0.284021	78.5099
5	1.5929	0.358559	1.03466	1.10846	0.0160517	1.01214	0.841663	0.270093	0.455353	0.123855	5.21327	36.0936	35.7769	4.10826	52.0971	144.493	10.6105	73.3612	36.6243	5.74631	2.06284	1.29901	77.466	12.355	5.54499	11.2586	1.52848	6.31484	1.40653	0.323554	1.29417	0.200702	1.17464	0.237016	0.630939	0.0874978	0.542685	0.0849905	144.153	0.948199	2.09543	6.13354	0.919389	0.135774	0.35068	1.73018	10.8331	0.291888	72.0488
6	1.54168	0.382102	0.850151	1.01517	0.0154419	1.11225	0.954394	0.31996	0.483675	0.144462	5.8726	38.3006	41.022	3.30818	45.0217	156.853	10.0437	69.7326	42.6935	6.32028	2.34375	1.40408	77.6118	11.7056	6.21075	12.8829	1.75946	7.32013	1.63586	0.380255	1.49958	0.233531	1.3507	0.267889	0.713582	0.0985177	0.611136	0.0954785	155.989	1.01731	2.40927	6.8902	1.08826	0.155424	0.36162	1.84714	10.3917	0.252232	67.9985
7	1.36419	0.38996	1.05272	1.00456	0.0169641	1.05454	0.975402	0.343448	0.449567	0.141942	5.56631	31.8939	39.9068	4.23212	53.4977	154.627	9.11737	78.0492	39.9762	6.14812	2.28456	1.45739	75.0543	12.3161	5.78516	11.9473	1.63635	6.84043	1.52418	0.362652	1.41689	0.221632	1.28742	0.258234	0.68202	0.094177	0.586811	0.0924311	154.069	0.851381	2.17572	6.61333	1.0034	0.139511	0.303817	1.6849	9.29007	0.254232	76.0888
8	1.64586	0.424803	1.17682	1.15272	0.0190528	1.04228	0.908215	0.283303	0.476486	0.134779	5.59712	37.1445	41.7925	4.39951	51.835	148.135	10.8826	70.3533	42.8955	6.75695	2.43727	1.36629	72.6967	13.5543	5.77623	12.2146	1.6711	7.09328	1.65368	0.388554	1.54369	0.242407	1.42627	0.282045	0.738005	0.103652	0.637471	0.0977945	146.975	0.987689	2.43172	7.10424	1.07824	0.157005	0.381574	1.84597	11.0707	0.321061	69.5364
9	1.56701	0.418505	1.17411	1.15711	0.0179014	1.12141	0.958274	0.323926	0.480367	0.148244	5.85928	36.5557	41.7008	4.27308	56.6992	154.416	10.3649	77.0731	42.7253	6.41899	2.48847	1.40435	68.2691	12.9894	6.15198	12.8473	1.74915	7.26974	1.64568	0.38633	1.51446	0.235395	1.37543	0.273399	0.717257	0.0996439	0.616381	0.0947131	154.387	1.04722	2.53391	6.84754	1.09435	0.164954	0.38566	1.86592	10.4656	0.297823	74.6398
10	1.63131	0.355729	0.963872	0.959002	0.0138763	1.03821	0.800873	0.223001	0.439074	0.110307	5.41001	39.9731	38.8637	3.45252	41.1542	133.356	10.4803	60.0764	41.0261	5.86558	2.32359	1.1861	61.5983	12.3606	5.6661	11.7462	1.58883	6.61339	1.50049	0.341788	1.38238	0.212444	1.22925	0.243432	0.649383	0.0901724	0.556671	0.0872764	132.914	1.14042	2.44116	6.29602	1.03402	0.161166	0.417656	1.84395	10.5562	0.322457	60.6127
11	1.49273	0.391226	0.953844	0.988359	0.0152589	1.14095	0.852409	0.267601	0.451619	0.127128	5.98531	40.4498	39.2704	3.51189	45.1699	133.716	10.1121	65.3499	43.0914	6.27803	2.57106	1.28781	64.7947	12.4091	5.66602	12.1501	1.66674	7.00455	1.64812	0.390952	1.49945	0.23375	1.36999	0.267598	0.701336	0.0986929	0.605641	0.0923849	133.298	1.01332	2.60746	6.75506	1.10487	0.16909	0.364172	1.74536	10.3161	0.311984	64.5797
12	1.56774	0.41004	1.14494	1.14195	0.0172397	1.07669	0.930556	0.33675	0.482986	0.154165	5.76908	38.2333	39.1547	4.60928	55.0914	158.019	10.1659	83.9345	41.8568	6.14059	2.40498	1.30746	71.9359	13.3482	6.30684	13.0734	1.77618	7.3442	1.62963	0.385458	1.49429	0.231358	1.35816	0.270991	0.705695	0.097924	0.606751	0.0934033	157.666	0.960112	2.52734	6.77133	1.07395	0.161604	0.353164	1.80222	10.3462	0.309731	81.93
13	1.37696	0.374099	1.1545	1.05195	0.0165405	1.06914	0.839126	0.266319	0.430276	0.116475	5.49571	37.3418	37.3062	3.98154	49.6441	129.697	9.92361	66.9634	40.2585	6.15076	2.27194	1.35002	73.5546	12.1456	5.28522	11.2037	1.53412	6.47552	1.48797	0.35469	1.42055	0.220023	1.28145	0.257938	0.685621	0.0949163	0.59136	0.0921877	128.852	0.9519	2.29995	6.59742	1.01338	0.148982	0.348179	1.68516	9.98209	0.293839	65.2858
14	1.50519	0.381614	1.00992	1.06735	0.0169065	0.994033	0.739614	0.238279	0.411728	0.116524	5.17176	36.5303	36.4869	3.77291	47.9032	123.723	9.81388	63.0517	37.7665	6.3921	2.24296	1.2367	68.3642	12.2493	5.1481	10.7775	1.49618	6.32534	1.47603	0.352969	1.42416	0.224662	1.31517	0.262721	0.704335	0.0970258	0.596237	0.0922176	124.045	0.900497	2.29537	6.89163	0.96437	0.14747	0.33229	1.58956	9.99919	0.285511	62.4099
15	1.48423	0.388343	1.07307	1.02736	0.0179362	1.07673	0.966586	0.336203	0.487199	0.147145	5.59964	36.7293	42.8236	4.16915	51.5662	156.831	10.0658	78.255	42.0107	6.28463	2.35115	1.37106	72.2664	12.1102	6.02133	12.6074	1.70358	7.09156	1.57859	0.374722	1.48074	0.230113	1.3418	0.270095	0.712613	0.099688	0.614852	0.0966054	156.466	0.931225	2.32543	6.83429	1.04974	0.148022	0.349373	1.79816	10.3064	0.286323	76.296
16	1.40752	0.372534	1.00773	0.945651	0.016137	1.0707	0.864961	0.299374	0.433878	0.127969	5.72227	35.7602	41.2192	4.11615	49.8575	135.864	9.74191	67.6283	38.4699	5.94584	2.24508	1.51916	64.7808	11.923	5.2998	11.0072	1.51915	6.37449	1.43433	0.34511	1.35505	0.21297	1.24032	0.247979	0.663226	0.0923587	0.568101	0.0896873	135.19	0.854507	2.15281	6.41289	0.946105	0.135672	0.320185	1.62859	9.80334	0.297335	66.6707
17	1.56263	0.347026	1.08125	1.13995	0.01623	0.983702	0.854277	0.254986	0.442838	0.107518	5.0335	33.4127	42.2737	3.82124	48.2067	124.909	10.4628	59.0918	35.8801	5.30149	1.94118	1.2941	69.1248	11.9278	5.01315	10.322	1.39772	5.82104	1.31652	0.309078	1.24337	0.195005	1.13089	0.228291	0.604742	0.0839246	0.520979	0.082317	125.051	0.93374	2.04694	5.80892	0.908803	0.131821	0.351672	1.62593	10.8172	0.296113	56.295
18	1.49237	0.384633	1.02444	1.00023	0.0158113	1.13553	0.90008	0.302871	0.465996	0.137136	5.83937	37.1179	41.867	3.55327	45.4534	150.284	10.4213	68.5999	43.8539	6.55644	2.58696	1.46218	65.5997	12.2949	6.09737	12.7946	1.74906	7.32444	1.67712	0.389977	1.52829	0.23688	1.38208	0.271006	0.719887	0.0993154	0.60941	0.0954538	149.746	1.07167	2.55306	6.91236	1.10807	0.165538	0.386774	1.85138	10.4287	0.26233	67.8756
19	1.4683	0.39858	1.06006	1.08324	0.0171612	0.958684	0.780957	0.233883	0.392504	0.112095	5.33857	33.2135	37.682	4.14092	50.9317	124.807	9.4703	62.8868	39.1394	6.10997	2.32683	1.29638	65.2911	13.2302	4.9901	10.7319	1.48239	6.33446	1.48715	0.358372	1.41025	0.217528	1.28121	0.251235	0.657071	0.0912272	0.560085	0.0862503	123.254	0.864399	2.2495	6.31672	0.973048	0.145871	0.334013	1.60136	9.64093	0.311786	62.7566
20	1.47212	0.413727	1.11393	1.18139	0.0181926	1.02715	0.874546	0.291578	0.436944	0.130569	5.46302	35.175	35.5755	4.07271	51.7253	139.679	9.99738	73.7604	39.2056	6.24547	2.28546	1.46288	77.8752	13.1155	5.25346	11.1905	1.53636	6.50387	1.50653	0.364509	1.43102	0.226637	1.31698	0.263594	0.688434	0.0969566	0.594667	0.0919734	139.184	0.791669	2.24358	6.60547	0.986067	0.143375	0.296048	1.57718	10.2443	0.276385	71.7528
21	1.52137	0.411672	1.282	1.2021	0.018608	1.00999	0.864241	0.299132	0.447313	0.145949	5.40729	37.5826	41.5065	4.78961	56.3251	147.14	9.7333	87.3627	39.9948	6.27447	2.30336	1.20922	70.3931	13.4072	5.92877	12.3685	1.67728	7.00174	1.56977	0.376762	1.48458	0.229472	1.34727	0.272083	0.705952	0.0988713	0.612092	0.0935627	146.913	0.920338	2.4269	6.82529	1.02695	0.155329	0.337999	1.71598	9.89726	0.320498	84.4565
22	1.63344	0.370643	1.10659	1.04683	0.017018	1.03552	0.840281	0.263873	0.435195	0.124601	5.66853	39.1206	37.943	4.64073	52.8056	139.38	11.2363	71.6091	37.8745	6.01728	2.25565	1.44026	60.8722	12.9607	5.34685	11.1624	1.51106	6.29173	1.43708	0.341298	1.34477	0.21215	1.24839	0.250907	0.65852	0.0922956	0.567299	0.0875341	139.528	0.926634	2.26181	6.36452	0.947109	0.143488	0.365413	1.66299	11.3654	0.346778	71.4403
23	1.59856	0.393065	1.13884	1.14497	0.0175332	1.07828	0.916822	0.277645	0.465479	0.134303	5.7729	37.1387	43.069	4.05975	48.4102	144.565	10.7164	72.8772	43.0318	6.45457	2.3472	1.43056	69.6797	12.9328	5.88718	12.4858	1.69085	7.08396	1.62725	0.38161	1.50296	0.23543	1.37517	0.27426	0.718771	0.100853	0.622759	0.0960876	144.258	1.074	2.49972	6.87164	1.10096	0.162837	0.41065	1.86381	10.8773	0.315283	72.235
24	1.61128	0.390799	0.962707	1.11788	0.0161044	1.09315	0.876068	0.306046	0.456631	0.128667	5.57223	37.0458	36.9138	3.80547	49.1137	140.544	10.4184	74.4761	39.2183	5.87581	2.40041	1.2398	68.8165	13.1823	5.5287	11.5164	1.56404	6.49311	1.47674	0.35292	1.37384	0.213848	1.24937	0.246241	0.652284	0.0907736	0.557097	0.086111	140.798	0.925799	2.35919	6.27812	0.99101	0.152011	0.341676	1.67165	10.6451	0.304112	73.2988
25	1.58071	0.403228	1.00494	0.995425	0.0178214	1.16056	0.936945	0.293081	0.481475	0.141125	6.19503	39.714	41.1799	3.8872	50.9816	151.556	11.1539	68.3139	44.6194	6.73711	2.52212	1.55992	77.2139	11.8145	5.98541	12.8186	1.74058	7.32757	1.6774	0.401734	1.57175	0.246045	1.41837	0.284284	0.75542	0.104855	0.645948	0.100503	150.959	1.08519	2.51699	7.21186	1.13042	0.163261	0.406348	1.90491	11.1932	0.314218	67.9068
26	1.63547	0.371861	0.991382	0.998086	0.0152761	0.981481	0.865602	0.270785	0.492645	0.132556	5.18927	38.3615	37.2748	4.19055	50.4249	138.5	11.5529	75.8037	39.0274	6.07795	2.2787	1.22952	68.2788	11.4648	5.44746	11.5913	1.55263	6.44248	1.46412	0.344807	1.37514	0.216454	1.27935	0.256593	0.676388	0.0949698	0.586427	0.0914172	138.401	0.991114	2.30535	6.50763	0.985961	0.14884	0.385949	1.74022	11.5987	0.349521	74.6275
27	1.40835	0.321022	0.996625	0.959767	0.0149599	0.904572	0.76056	0.243631	0.415569	0.114839	4.7323	34.4795	37.997	3.87532	42.8872	119.545	9.45769	68.3554	34.5339	5.44005	2.00416	1.18514	64.906	10.8307	4.83236	10.1588	1.38391	5.79413	1.31833	0.314494	1.24814	0.196056	1.15134	0.230822	0.614809	0.0868182	0.529776	0.0836533	119.959	0.817767	2.04429	6.00708	0.866742	0.130247	0.326379	1.48012	9.61837	0.300767	67.3029
28	1.60876	0.369939	1.00411	0.987012	0.0151639	1.06888	0.832601	0.268403	0.45177	0.123824	5.77976	36.8965	37.2691	4.01373	48.193	135.932	10.8156	70.7152	41.2657	6.33074	2.51542	1.33995	66.7322	12.4371	5.49152	11.7297	1.5891	6.67153	1.54182	0.358576	1.42811	0.222457	1.31694	0.259041	0.686427	0.09482	0.585341	0.0903551	135.609	1.04396	2.35639	6.58384	1.03594	0.153919	0.40256	1.8004	10.8097	0.339072	70.4702
29	1.47362	0.386935	0.930623	1.04323	0.0157265	1.05053	0.788324	0.251823	0.436278	0.12062	5.56033	35.1753	43.7773	3.31763	46.7969	124.398	10.5485	58.9029	41.3833	6.50103	2.46051	1.39929	68.8058	12.0159	5.41481	11.4113	1.55894	6.57408	1.50582	0.360336	1.43574	0.222282	1.30992	0.25902	0.697108	0.0962009	0.593096	0.0927561	124.504	1.01211	2.38036	6.77114	1.01956	0.153974	0.375847	1.70599	10.6642	0.278316	58.96
30	1.52914	0.369713	1.16247	1.04465	0.0167924	1.05941	0.830507	0.28661	0.441704	0.122374	5.57211	38.4359	41.3175	4.36376	47.4928	138.677	10.4324	78.1091	39.815	5.98232	2.32281	1.363	67.1116	12.9875	5.54129	11.4824	1.55974	6.53663	1.46086	0.348745	1.38223	0.212164	1.23757	0.247832	0.656389	0.0910546	0.561187	0.0880069	138.661	0.942838	2.30027	6.37265	0.988276	0.146312	0.35054	1.70189	10.6044	0.32826	77.1514
31	1.51169	0.369841	1.06904	0.990661	0.0162886	1.12212	0.91457	0.309346	0.461546	0.130732	5.92954	38.8914	41.0467	4.13089	45.4975	143.154	10.2924	73.5419	41.8568	6.21057	2.32379	1.38666	69.0579	12.5342	5.73404	12.0191	1.63649	6.849	1.55029	0.366856	1.44279	0.225446	1.3088	0.262136	0.689912	0.0962112	0.597816	0.0923459	142.954	0.970305	2.38157	6.63452	1.05648	0.152538	0.366943	1.76734	10.5633	0.32737	72.4861
32	1.85558	0.366428	0.862591	0.943665	0.0146784	1.31945	1.13832	0.383023	0.570615	0.154994	6.63811	41.7306	43.9011	4.10259	49.1675	183.265	12.4159	82.1727	45.9543	6.36327	2.44762	1.36886	75.913	11.4898	6.8642	14.0808	1.8906	7.72602	1.69792	0.382303	1.4971	0.233831	1.34013	0.267223	0.713403	0.0991409	0.622119	0.0960068	182.231	1.24886	2.54855	6.80358	1.16868	0.168823	0.452917	2.19204	12.5833	0.342913	80.7221
33	1.56227	0.405341	1.14665	1.09964	0.0177185	1.01773	0.808928	0.23667	0.456429	0.117874	5.55274	36.2846	35.4278	4.29888	52.744	127.203	11.4258	67.1896	40.1852	6.59355	2.40215	1.43863	71.7025	12.9724	5.03502	10.9196	1.48644	6.34117	1.48381	0.358236	1.43282	0.226691	1.33279	0.267606	0.711046	0.0987634	0.608496	0.0950708	127.539	0.965967	2.24627	6.79419	1.00042	0.144577	0.379804	1.7005	11.3892	0.349514	67.0999
34	1.59066	0.35919	1.18458	1.09221	0.0174573	0.997664	0.9372	0.318509	0.45641	0.137445	5.24131	34.6204	40.0839	4.35389	50.2089	154.361	9.91289	81.5505	37.9256	5.75588	2.17622	1.33485	73.67	11.8268	5.63805	11.6185	1.56933	6.52271	1.43304	0.333435	1.32926	0.207382	1.20721	0.24313	0.639927	0.089941	0.550101	0.0868286	153.132	0.893955	2.1185	6.16249	0.935559	0.1357	0.342452	1.72773	10.1363	0.292699	79.759
35	1.49232	0.388146	1.138	1.09125	0.0178517	1.05263	0.797343	0.279871	0.426172	0.123525	5.37077	35.6969	35.068	4.14944	49.5621	135.632	10.3482	68.3722	37.2533	5.87872	2.31544	1.43668	64.519	12.5323	5.13674	10.9421	1.48516	6.21761	1.43297	0.348757	1.35343	0.212679	1.24225	0.248392	0.649095	0.0896013	0.549279	0.0842945	136.118	0.781683	2.26986	6.12969	0.943204	0.142773	0.313782	1.54173	10.5721	0.29296	66.6428
36	1.29588	0.392003	1.02779	1.03903	0.0169372	0.984558	0.789232	0.265133	0.40708	0.121439	5.31095	31.4786	37.9597	3.42341	48.917	124.779	9.13598	59.2254	39.5265	6.31712	2.41017	1.44778	71.5652	12.2646	4.98996	10.8738	1.50022	6.43218	1.50535	0.359092	1.43961	0.225111	1.31202	0.261281	0.692291	0.0955145	0.584901	0.0919095	124.672	0.854289	2.24479	6.60259	0.991154	0.143881	0.321074	1.53727	9.13555	0.247592	58.5939
37	1.46474	0.380622	1.17325	1.0255	0.0165131	1.05135	0.824079	0.237786	0.422929	0.113721	5.94933	36.5954	40.1693	3.9898	48.8196	126.774	10.2215	57.1196	40.8667	6.5129	2.25984	1.54372	70.7692	12.7806	5.33581	11.2305	1.56119	6.67489	1.54472	0.358518	1.46901	0.231427	1.34172	0.270784	0.725409	0.100151	0.617713	0.0978687	126.411	1.01992	2.25378	7.03245	1.0389	0.145609	0.374415	1.74793	10.2021	0.324833	56.4686
38	1.60837	0.41211	1.10035	1.14662	0.01726	1.09287	0.880418	0.298917	0.479066	0.139164	5.77693	36.8269	44.1796	4.28975	51.7065	145.718	10.9354	65.8515	42.8131	6.3166	2.40727	1.36995	63.5666	13.2983	5.88435	12.51	1.70233	7.19391	1.6511	0.39554	1.52964	0.236319	1.37489	0.269973	0.702051	0.0976688	0.603845	0.0927115	144.765	1.01289	2.51999	6.76381	1.09006	0.161965	0.384104	1.79891	11.1836	0.3184	64.3849
39	1.35841	0.393044	1.1557	1.10703	0.0178053	1.00136	0.799777	0.267648	0.402818	0.124607	5.5805	34.2997	40.2428	3.95631	47.6535	125.534	8.99956	70.7946	40.2126	6.61749	2.34713	1.36485	74.223	12.847	5.23532	11.258	1.56427	6.70499	1.56139	0.37491	1.49926	0.23561	1.38462	0.277282	0.732586	0.10148	0.6244	0.0974783	125.149	0.911423	2.32054	7.07845	1.03367	0.150449	0.337421	1.61375	8.98724	0.285004	70.0813
40	1.46458	0.387535	1.09851	1.03094	0.0163584	0.969524	0.772265	0.281058	0.414978	0.127791	5.22603	32.7776	39.7488	4.24788	49.4119	132.876	9.43047	69.2978	38.6038	5.7907	2.38934	1.34088	60.5885	12.8179	5.2793	11.135	1.51723	6.41754	1.45544	0.34393	1.35359	0.212619	1.23422	0.244023	0.63497	0.0882827	0.539903	0.0839857	133.091	0.840114	2.28263	6.065	0.952915	0.145025	0.326527	1.57794	9.47987	0.302884	69.2835
41	1.4305	0.396403	1.18584	1.01678	0.0167459	1.00226	0.8296	0.269632	0.452235	0.127721	5.27261	37.2458	36.8992	4.22135	53.8058	139.285	9.80574	73.4889	41.0542	6.49625	2.32615	1.29845	73.7776	12.0065	5.64024	11.9218	1.61402	6.79388	1.56556	0.364903	1.48155	0.233587	1.36351	0.277342	0.725619	0.102206	0.630155	0.0990325	139.155	0.949442	2.39557	7.04537	1.0386	0.154346	0.346502	1.75157	9.98994	0.287487	71.1034
42	1.4526	0.370837	1.19973	1.12202	0.0174662	0.986849	0.769932	0.241615	0.402229	0.10477	5.38504	35.2917	41.5181	4.23826	47.4172	115.496	9.76855	62.5017	36.9714	6.00034	2.12419	1.32581	68.4737	12.8839	4.78862	10.0312	1.39315	5.96114	1.39173	0.333946	1.34284	0.210572	1.2371	0.248604	0.656063	0.0909399	0.561674	0.0874764	115.194	0.865453	2.08287	6.3509	0.926012	0.13364	0.325314	1.53964	9.98597	0.310304	60.3217
43	1.54746	0.360856	0.89873	0.970645	0.0139227	1.09488	0.971934	0.320891	0.480944	0.140313	5.67199	37.846	39.8212	3.75292	48.5591	159.541	9.96923	78.2327	39.437	5.96844	2.27785	1.36006	68.6624	11.6097	6.01422	12.2066	1.65768	6.81299	1.49453	0.341785	1.35446	0.209814	1.22716	0.245498	0.655889	0.091151	0.566177	0.0884258	159.056	0.968262	2.28515	6.40184	0.987897	0.146282	0.350762	1.82277	10.2507	0.269393	76.4412
44	1.49818	0.358279	1.03788	1.03584	0.0162929	1.01342	0.855727	0.277455	0.458145	0.133637	5.14058	34.9525	42.0863	3.17757	42.7395	146.475	9.8855	71.1123	39.7566	5.83359	2.21195	1.3492	70.6702	11.0912	5.81811	12.0409	1.62312	6.76059	1.48524	0.35008	1.38742	0.215669	1.23424	0.247449	0.654344	0.0910824	0.558822	0.0883076	146.546	0.974193	2.31426	6.37071	0.993017	0.147339	0.349961	1.76345	10.3073	0.243675	68.0632
45	1.46742	0.410997	1.05348	1.01514	0.0165114	1.10797	0.915069	0.351636	0.453147	0.148911	5.82183	36.6416	39.5864	4.3695	52.9424	155.4	9.28624	89.1542	42.9207	6.48811	2.58151	1.22762	67.9101	12.4816	5.96835	12.5366	1.70495	7.10925	1.60562	0.385446	1.49044	0.233812	1.38183	0.272601	0.710903	0.0983491	0.61244	0.0940406	154.708	0.869049	2.4785	6.80134	1.07553	0.157355	0.321026	1.71984	9.3842	0.271565	87.3666
46	1.36985	0.381155	1.05256	0.947466	0.0159277	1.06799	0.821198	0.288058	0.407708	0.123163	5.75067	34.8625	38.7345	4.21071	47.3646	136.595	8.84591	68.3229	41.0343	6.17691	2.41274	1.3411	67.3044	12.447	5.40144	11.5716	1.58324	6.71336	1.54935	0.373584	1.4495	0.225401	1.31249	0.260325	0.680817	0.0938016	0.582597	0.0903139	136.469	0.877023	2.35736	6.58081	1.03394	0.151057	0.32178	1.64933	9.0565	0.283662	67.8584
47	1.48408	0.404945	1.08133	1.09743	0.0169796	1.00634	0.742927	0.223344	0.443456	0.111626	5.51459	35.6336	41.2054	3.75285	50.4009	114.053	10.9098	59.1269	40.4353	6.25903	2.3167	1.41118	66.5741	12.9527	5.07871	11.0207	1.50484	6.43187	1.51198	0.358357	1.45556	0.226841	1.31845	0.263482	0.697872	0.0970907	0.595001	0.0939186	114.007	0.959649	2.31912	6.67329	1.02372	0.149363	0.36767	1.63923	11.0985	0.326356	58.6135
48	1.63205	0.387876	1.10858	1.02646	0.0167623	1.10408	0.861936	0.274721	0.479701	0.132973	5.69578	39.3237	42.5711	3.85701	49.4938	144.607	11.1939	63.7849	42.4831	6.32852	2.40935	1.43241	65.1354	11.7294	5.96371	12.6119	1.7029	7.12809	1.61323	0.380251	1.50993	0.23422	1.34984	0.270026	0.718328	0.0987447	0.607358	0.0947774	143.983	1.07391	2.53215	6.90857	1.07982	0.163405	0.395735	1.85777	11.3869	0.312687	61.767
49	1.51644	0.384732	0.890904	1.08324	0.0159635	1.00393	0.894848	0.253033	0.476746	0.121019	5.41683	35.4423	38.0904	3.54818	50.2953	134.83	10.5111	63.6697	39.1146	6.0981	2.087	1.38133	76.204	11.9662	5.30764	11.287	1.5387	6.46968	1.50265	0.353461	1.412	0.220764	1.28419	0.257225	0.684292	0.0967121	0.594134	0.0932434	134.728	0.925381	2.17487	6.59233	0.995608	0.140856	0.35794	1.72703	10.973	0.309352	62.377
50	1.62824	0.392255	1.10042	1.03436	0.0174868	1.07562	0.86795	0.271342	0.458923	0.128116	5.78985	37.8961	39.0379	4.23202	51.3686	138.678	10.8872	65.5982	40.8586	6.03819	2.39008	1.43883	70.3523	12.4793	5.5935	11.8978	1.61617	6.79791	1.55727	0.368909	1.45318	0.225916	1.2994	0.258402	0.681302	0.0941965	0.580703	0.0897846	138.229	1.03408	2.38649	6.53094	1.04638	0.153927	0.386151	1.79197	11.0021	0.338937	64.2453
[truncated: 3 more columns]
